# Supplementary material for: Zika infection of neural progenitor cells perturbs transcription in neurodevelopmental pathways
Source: PLoS One. 2017 Apr 27;12(4):e0175744. doi: 10.1371/journal.pone.0175744 (PMC5407828; doi:10.1371/journal.pone.0175744)
Supplement: S1 Table — The 4610 transcripts across 3656 genes that are found to be differentially expressed using kallisto pseudoalignment and sleuth, ordered by p-value. The columns correspond to the Ensembl transcript ID (target_id), the p-value (pval), the false discovery rate (qval), the Ensembl gene ID (ens_gene) and the gene name (ext_gene). (CSV) [file pone.0175744.s001.csv]

	target_id	pval	qval	ens_gene	ext_gene
1	ENST00000433529.6	8.79E-10	1.76E-05	ENSG00000116001	TIA1
2	ENST00000295470.9	1.22E-09	1.76E-05	ENSG00000152795	HNRNPDL
3	ENST00000304567.9	1.36E-09	1.76E-05	ENSG00000171848	RRM2
4	ENST00000343737.5	1.67E-09	1.76E-05	ENSG00000075290	WNT8B
5	ENST00000253063.3	1.29E-09	1.76E-05	ENSG00000130766	SESN2
6	ENST00000303004.4	1.27E-09	1.76E-05	ENSG00000172216	CEBPB
7	ENST00000338663.11	1.80E-09	1.76E-05	ENSG00000168003	SLC3A2
8	ENST00000307365.3	7.92E-10	1.76E-05	ENSG00000168209	DDIT4
9	ENST00000265056.11	3.97E-09	3.14E-05	ENSG00000073111	MCM2
10	ENST00000523944.5	4.40E-09	3.14E-05	ENSG00000104738	MCM4
11	ENST00000264156.2	4.02E-09	3.14E-05	ENSG00000076003	MCM6
12	ENST00000394308.7	5.95E-09	3.59E-05	ENSG00000070669	ASNS
13	ENST00000330387.10	5.94E-09	3.59E-05	ENSG00000182158	CREB3L2
14	ENST00000439211.6	1.01E-08	3.95E-05	ENSG00000228716	DHFR
15	ENST00000375442.8	8.96E-09	3.95E-05	ENSG00000184205	TSPYL2
16	ENST00000610347.1	8.22E-09	3.95E-05	ENSG00000167615	LENG8
17	ENST00000580279.1	8.87E-09	3.95E-05	ENSG00000266524	GDF10
18	ENST00000252542.8	9.29E-09	3.95E-05	ENSG00000130254	SAFB2
19	ENST00000343380.5	8.69E-09	3.95E-05	ENSG00000101412	E2F1
20	ENST00000593576.1	1.00E-08	3.95E-05	ENSG00000269837	IPO5P1
21	ENST00000461283.5	1.16E-08	4.32E-05	ENSG00000131051	RBM39
22	ENST00000392066.7	1.53E-08	4.78E-05	ENSG00000123983	ACSL3
23	ENST00000265087.8	1.45E-08	4.78E-05	ENSG00000113739	STC2
24	ENST00000374523.8	1.42E-08	4.78E-05	ENSG00000204197	KIFC1
25	ENST00000472226.1	1.52E-08	4.78E-05	ENSG00000134884	ARGLU1
26	ENST00000634817.1	1.73E-08	5.02E-05	ENSG00000283085	TPBG
27	ENST00000535040.4	1.73E-08	5.02E-05	ENSG00000146242	TPBG
28	ENST00000217233.7	1.86E-08	5.13E-05	ENSG00000101255	TRIB3
29	ENST00000632612.1	1.90E-08	5.13E-05	ENSG00000278191	CARS
30	ENST00000367155.7	2.09E-08	5.46E-05	ENSG00000162873	KLHDC8A
31	ENST00000375366.3	2.25E-08	5.58E-05	ENSG00000204347	BTBD17
32	ENST00000253462.7	2.51E-08	5.58E-05	ENSG00000131153	GINS2
33	ENST00000234256.3	2.60E-08	5.58E-05	ENSG00000115902	SLC1A4
34	ENST00000229708.3	2.63E-08	5.58E-05	ENSG00000111981	ULBP1
35	ENST00000269397.8	2.54E-08	5.58E-05	ENSG00000141582	CBX4
36	ENST00000470592.5	2.42E-08	5.58E-05	ENSG00000065911	MTHFD2
37	ENST00000369409.8	2.51E-08	5.58E-05	ENSG00000092621	PHGDH
38	ENST00000409687.4	2.82E-08	5.81E-05	ENSG00000186193	SAPCD2
39	ENST00000530167.1	3.05E-08	6.01E-05	ENSG00000188486	H2AFX
40	ENST00000274063.4	3.07E-08	6.01E-05	ENSG00000145423	SFRP2
41	ENST00000409160.7	3.45E-08	6.59E-05	ENSG00000144485	HES6
42	ENST00000340384.4	3.62E-08	6.75E-05	ENSG00000188229	TUBB4B
43	ENST00000630669.2	4.19E-08	7.30E-05	ENSG00000280682	HYOU1
44	ENST00000617285.4	4.19E-08	7.30E-05	ENSG00000149428	HYOU1
45	ENST00000261772.12	4.16E-08	7.30E-05	ENSG00000090861	AARS
46	ENST00000393227.6	4.32E-08	7.37E-05	ENSG00000108848	LUC7L3
47	ENST00000389266.7	5.28E-08	8.45E-05	ENSG00000106105	GARS
48	ENST00000339464.8	5.13E-08	8.45E-05	ENSG00000188064	WNT7B
49	ENST00000261622.4	5.20E-08	8.45E-05	ENSG00000103257	SLC7A5
50	ENST00000314520.4	5.68E-08	8.90E-05	ENSG00000179455	MKRN3
51	ENST00000296657.6	5.89E-08	8.98E-05	ENSG00000164236	ANKRD33B
52	ENST00000592599.5	5.96E-08	8.98E-05	ENSG00000130254	SAFB2
53	ENST00000380752.9	6.23E-08	9.20E-05	ENSG00000139514	SLC7A1
54	ENST00000266970.8	6.38E-08	9.25E-05	ENSG00000123374	CDK2
55	ENST00000369466.8	7.53E-08	0.000107215	ENSG00000116830	TTF2
56	ENST00000310137.4	7.86E-08	0.000109933	ENSG00000239306	RBM14
57	ENST00000310847.8	8.14E-08	0.000111817	ENSG00000088448	ANKRD10
58	ENST00000480456.5	8.55E-08	0.0001155	ENSG00000154721	JAM2
59	ENST00000443831.1	9.04E-08	0.000120033	ENSG00000081479	LRP2
60	ENST00000234677.6	9.58E-08	0.000123069	ENSG00000031698	SARS
61	ENST00000358321.3	9.47E-08	0.000123069	ENSG00000099994	SUSD2
62	ENST00000370981.1	1.02E-07	0.000128911	ENSG00000162595	DIRAS3
63	ENST00000340535.11	1.04E-07	0.000128911	ENSG00000154305	MIA3
64	ENST00000354725.7	1.08E-07	0.000131646	ENSG00000197157	SND1
65	ENST00000373477.8	1.16E-07	0.000137723	ENSG00000134684	YARS
66	ENST00000495255.1	1.16E-07	0.000137723	ENSG00000070669	ASNS
67	ENST00000361170.6	1.24E-07	0.000142503	ENSG00000183856	IQGAP3
68	ENST00000263382.7	1.22E-07	0.000142503	ENSG00000105011	ASF1B
69	ENST00000454366.1	1.34E-07	0.000145898	ENSG00000075218	GTSE1
70	ENST00000323274.14	1.31E-07	0.000145898	ENSG00000176890	TYMS
71	ENST00000532292.2	1.34E-07	0.000145898	ENSG00000254585	MAGEL2
72	ENST00000280258.5	1.32E-07	0.000145898	ENSG00000150687	PRSS23
73	ENST00000602398.2	1.38E-07	0.000148556	ENSG00000139697	SBNO1
74	ENST00000330949.2	1.51E-07	0.000153624	ENSG00000182968	SOX1
75	ENST00000485922.2	1.55E-07	0.000153624	ENSG00000139880	CDH24
76	ENST00000524226.5	1.50E-07	0.000153624	ENSG00000078674	PCM1
77	ENST00000392456.3	1.54E-07	0.000153624	ENSG00000152492	CCDC50
78	ENST00000375643.7	1.50E-07	0.000153624	ENSG00000196305	IARS
79	ENST00000350051.7	1.55E-07	0.000153624	ENSG00000089685	BIRC5
80	ENST00000346473.7	1.58E-07	0.000155173	ENSG00000175197	DDIT3
81	ENST00000630287.2	1.63E-07	0.000157976	ENSG00000117394	SLC2A1
82	ENST00000231061.8	1.73E-07	0.000164821	ENSG00000113140	SPARC
83	ENST00000432425.5	1.77E-07	0.000166672	ENSG00000013441	CLK1
84	ENST00000216727.8	1.81E-07	0.000169109	ENSG00000100836	PABPN1
85	ENST00000634826.1	1.92E-07	0.000172732	ENSG00000283085	TPBG
86	ENST00000368223.3	1.88E-07	0.000172732	ENSG00000132688	NES
87	ENST00000543496.3	1.92E-07	0.000172732	ENSG00000146242	TPBG
88	ENST00000367976.3	2.05E-07	0.00017905	ENSG00000118523	CTGF
89	ENST00000340124.8	2.14E-07	0.00017905	ENSG00000166123	GPT2
90	ENST00000216037.10	2.12E-07	0.00017905	ENSG00000100219	XBP1
91	ENST00000476217.5	2.07E-07	0.00017905	ENSG00000114850	SSR3
92	ENST00000285071.8	2.15E-07	0.00017905	ENSG00000154803	FLCN
93	ENST00000340852.9	2.08E-07	0.00017905	ENSG00000101294	HM13
94	ENST00000393633.6	2.09E-07	0.00017905	ENSG00000223705	NSUN5P1
95	ENST00000300403.10	2.21E-07	0.000182658	ENSG00000088325	TPX2
96	ENST00000266085.6	2.26E-07	0.000182981	ENSG00000100234	TIMP3
97	ENST00000264748.6	2.34E-07	0.000182981	ENSG00000127418	FGFRL1
98	ENST00000617581.4	2.31E-07	0.000182981	ENSG00000164651	SP8
99	ENST00000256495.3	2.32E-07	0.000182981	ENSG00000134107	BHLHE40
100	ENST00000370536.4	2.32E-07	0.000182981	ENSG00000134595	SOX3
101	ENST00000379143.9	2.44E-07	0.000187663	ENSG00000132646	PCNA
102	ENST00000267569.5	2.59E-07	0.000187663	ENSG00000140044	JDP2
103	ENST00000380605.2	2.48E-07	0.000187663	ENSG00000088882	CPXM1
104	ENST00000394980.5	2.57E-07	0.000187663	ENSG00000138722	MMRN1
105	ENST00000261366.9	2.42E-07	0.000187663	ENSG00000113368	LMNB1
106	ENST00000229854.11	2.58E-07	0.000187663	ENSG00000112118	MCM3
107	ENST00000315579.9	2.59E-07	0.000187663	ENSG00000010292	NCAPD2
108	ENST00000301280.9	2.49E-07	0.000187663	ENSG00000167670	CHAF1A
109	ENST00000229201.4	2.67E-07	0.000189829	ENSG00000111602	TIMELESS
110	ENST00000489841.5	2.66E-07	0.000189829	ENSG00000166508	MCM7
111	ENST00000276533.3	2.79E-07	0.000190105	ENSG00000147536	GINS4
112	ENST00000313871.8	2.83E-07	0.000190105	ENSG00000197976	AKAP17A
113	ENST00000587309.5	2.87E-07	0.000190105	ENSG00000186185	KIF18B
114	ENST00000557154.5	2.89E-07	0.000190105	ENSG00000100650	SRSF5
115	ENST00000257868.9	2.86E-07	0.000190105	ENSG00000135414	GDF11
116	ENST00000256442.9	2.81E-07	0.000190105	ENSG00000134057	CCNB1
117	ENST00000371984.7	2.87E-07	0.000190105	ENSG00000085998	POMGNT1
118	ENST00000382011.9	2.86E-07	0.000190105	ENSG00000100297	MCM5
119	ENST00000263847.5	2.86E-07	0.000190105	ENSG00000110048	OSBP
120	ENST00000367446.7	3.08E-07	0.000198742	ENSG00000116747	TROVE2
121	ENST00000423517.6	3.07E-07	0.000198742	ENSG00000186472	PCLO
122	ENST00000471542.5	3.09E-07	0.000198742	ENSG00000173209	AHSA2
123	ENST00000252809.3	3.34E-07	0.000204192	ENSG00000130513	GDF15
124	ENST00000286760.5	3.36E-07	0.000204192	ENSG00000156232	WHAMM
125	ENST00000437081.1	3.24E-07	0.000204192	ENSG00000186472	PCLO
126	ENST00000611878.4	3.35E-07	0.000204192	ENSG00000274305	LENG8
127	ENST00000539084.5	3.35E-07	0.000204192	ENSG00000010292	NCAPD2
128	ENST00000619260.4	3.35E-07	0.000204192	ENSG00000276681	LENG8
129	ENST00000248098.7	3.23E-07	0.000204192	ENSG00000206053	HN1L
130	ENST00000326828.5	3.51E-07	0.000210088	ENSG00000080644	CHRNA3
131	ENST00000258494.13	3.51E-07	0.000210088	ENSG00000136010	ALDH1L2
132	ENST00000305737.6	3.67E-07	0.000216343	ENSG00000168769	TET2
133	ENST00000400337.6	3.65E-07	0.000216343	ENSG00000182871	COL18A1
134	ENST00000493076.5	3.74E-07	0.000218757	ENSG00000100297	MCM5
135	ENST00000375856.4	3.79E-07	0.000219816	ENSG00000185950	IRS2
136	ENST00000391976.6	3.84E-07	0.000221303	ENSG00000115677	HDLBP
137	ENST00000367188.4	3.94E-07	0.000225145	ENSG00000158615	PPP1R15B
138	ENST00000367922.7	3.97E-07	0.000225246	ENSG00000162733	DDR2
139	ENST00000514610.1	4.13E-07	0.000230727	ENSG00000112972	HMGCS1
140	ENST00000425608.5	4.11E-07	0.000230727	ENSG00000004534	RBM6
141	ENST00000389131.7	4.15E-07	0.000230727	ENSG00000134013	LOXL2
142	ENST00000376588.3	4.30E-07	0.000237347	ENSG00000135069	PSAT1
143	ENST00000506572.5	4.34E-07	0.000237639	ENSG00000134057	CCNB1
144	ENST00000492667.5	4.45E-07	0.000242237	ENSG00000075826	SEC31B
145	ENST00000254508.6	4.49E-07	0.000242655	ENSG00000132182	NUP210
146	ENST00000225174.7	4.61E-07	0.000244779	ENSG00000108179	PPIF
147	ENST00000624301.3	4.58E-07	0.000244779	ENSG00000276043	UHRF1
148	ENST00000439096.2	4.62E-07	0.000244779	ENSG00000105327	BBC3
149	ENST00000389887.9	4.72E-07	0.000246987	ENSG00000166105	GLB1L3
150	ENST00000372164.7	4.74E-07	0.000246987	ENSG00000108219	TSPAN14
151	ENST00000192788.5	4.76E-07	0.000246987	ENSG00000065060	UHRF1BP1
152	ENST00000633720.1	4.82E-07	0.000248428	ENSG00000278191	CARS
153	ENST00000269593.4	4.89E-07	0.000250243	ENSG00000141753	IGFBP4
154	ENST00000451137.6	4.93E-07	0.000250565	ENSG00000142871	CYR61
155	ENST00000622683.4	5.03E-07	0.000254435	ENSG00000275832	ARHGAP23
156	ENST00000471705.1	5.11E-07	0.000254923	ENSG00000031698	SARS
157	ENST00000468588.1	5.10E-07	0.000254923	ENSG00000031698	SARS
158	ENST00000306434.7	5.20E-07	0.000256084	ENSG00000168906	MAT2A
159	ENST00000403683.1	5.23E-07	0.000256084	ENSG00000203852	HIST2H3A
160	ENST00000369158.1	5.23E-07	0.000256084	ENSG00000203811	HIST2H3C
161	ENST00000356455.8	5.44E-07	0.000263935	ENSG00000175063	UBE2C
162	ENST00000566948.5	5.46E-07	0.000263935	ENSG00000047346	FAM214A
163	ENST00000415493.6	5.57E-07	0.000267902	ENSG00000173598	NUDT4
164	ENST00000270815.4	5.65E-07	0.000270003	ENSG00000142686	C1orf216
165	ENST00000559090.5	5.70E-07	0.000270459	ENSG00000021776	AQR
166	ENST00000311575.5	5.73E-07	0.000270459	ENSG00000174721	FGFBP3
167	ENST00000356433.9	5.86E-07	0.000271487	ENSG00000090932	DLL3
168	ENST00000366787.7	5.85E-07	0.000271487	ENSG00000186340	THBS2
169	ENST00000466490.6	5.80E-07	0.000271487	ENSG00000144867	SRPRB
170	ENST00000268150.12	5.97E-07	0.000274397	ENSG00000140545	MFGE8
171	ENST00000285407.10	5.99E-07	0.000274397	ENSG00000155090	KLF10
172	ENST00000379370.6	6.18E-07	0.000281033	ENSG00000188157	AGRN
173	ENST00000272937.9	6.21E-07	0.000281033	ENSG00000144485	HES6
174	ENST00000374403.3	6.28E-07	0.000282802	ENSG00000090889	KIF4A
175	ENST00000591776.5	6.32E-07	0.000282965	ENSG00000173812	EIF1
176	ENST00000332312.3	6.48E-07	0.000285192	ENSG00000183798	EMILIN3
177	ENST00000616261.1	6.46E-07	0.000285192	ENSG00000134684	YARS
178	ENST00000357765.6	6.45E-07	0.000285192	ENSG00000115446	UNC50
179	ENST00000336023.9	6.60E-07	0.000289062	ENSG00000123416	TUBA1B
180	ENST00000395863.7	6.75E-07	0.000293733	ENSG00000101144	BMP7
181	ENST00000409134.7	6.79E-07	0.00029382	ENSG00000164904	ALDH7A1
182	ENST00000572314.5	7.01E-07	0.000301635	ENSG00000140750	ARHGAP17
183	ENST00000568107.2	7.08E-07	0.000302931	ENSG00000261609	GAN
184	ENST00000221486.4	7.22E-07	0.000307263	ENSG00000104889	RNASEH2A
185	ENST00000394457.7	7.34E-07	0.000310659	ENSG00000173209	AHSA2
186	ENST00000311124.8	7.45E-07	0.000313618	ENSG00000173638	SLC19A1
187	ENST00000368653.7	7.54E-07	0.000314086	ENSG00000148773	MKI67
188	ENST00000312960.3	7.53E-07	0.000314086	ENSG00000181788	SIAH2
189	ENST00000297185.7	7.74E-07	0.00031585	ENSG00000113013	HSPA9
190	ENST00000163416.6	7.72E-07	0.00031585	ENSG00000066455	GOLGA5
191	ENST00000256649.8	7.67E-07	0.00031585	ENSG00000134253	TRIM45
192	ENST00000602367.1	7.65E-07	0.00031585	ENSG00000216775	RP1-152L7.5
193	ENST00000288207.6	7.92E-07	0.000321605	ENSG00000157456	CCNB2
194	ENST00000431879.7	8.20E-07	0.000326285	ENSG00000187109	NAP1L1
195	ENST00000399352.5	8.17E-07	0.000326285	ENSG00000205726	ITSN1
196	ENST00000300026.3	8.13E-07	0.000326285	ENSG00000166794	PPIB
197	ENST00000620514.1	8.15E-07	0.000326285	ENSG00000118418	HMGN3
198	ENST00000484907.1	8.37E-07	0.000330989	ENSG00000130177	CDC16
199	ENST00000280612.9	8.52E-07	0.000334663	ENSG00000151012	SLC7A11
200	ENST00000370501.3	8.54E-07	0.000334663	ENSG00000101188	NTSR1
201	ENST00000600004.1	8.92E-07	0.000347757	ENSG00000099326	MZF1
202	ENST00000238788.13	9.02E-07	0.000349834	ENSG00000119777	TMEM214
203	ENST00000306376.9	9.06E-07	0.000349834	ENSG00000244405	ETV5
204	ENST00000467843.6	9.13E-07	0.000350763	ENSG00000109046	WSB1
205	ENST00000319863.12	9.33E-07	0.000356453	ENSG00000177225	PDDC1
206	ENST00000603926.5	9.42E-07	0.000358315	ENSG00000124006	OBSL1
207	ENST00000395139.7	9.66E-07	0.000365656	ENSG00000068001	HYAL2
208	ENST00000374736.7	9.90E-07	0.000372754	ENSG00000165029	ABCA1
209	ENST00000520164.5	9.95E-07	0.000372811	ENSG00000221818	EBF2
210	ENST00000348225.6	1.00E-06	0.000372965	ENSG00000105894	PTN
211	ENST00000373001.3	1.01E-06	0.000373991	ENSG00000116954	RRAGC
212	ENST00000205143.4	1.02E-06	0.000377638	ENSG00000090932	DLL3
213	ENST00000310955.10	1.03E-06	0.000377638	ENSG00000117399	CDC20
214	ENST00000401878.7	1.03E-06	0.000377638	ENSG00000184863	RBM33
215	ENST00000285379.9	1.06E-06	0.000385709	ENSG00000104267	CA2
216	ENST00000372129.3	1.06E-06	0.000385709	ENSG00000133124	IRS4
217	ENST00000261177.9	1.08E-06	0.000389443	ENSG00000110900	TSPAN11
218	ENST00000305123.5	1.10E-06	0.000389443	ENSG00000169047	IRS1
219	ENST00000366794.9	1.09E-06	0.000389443	ENSG00000143799	PARP1
220	ENST00000327987.8	1.09E-06	0.000389443	ENSG00000174498	IGDCC3
221	ENST00000367342.8	1.10E-06	0.000389443	ENSG00000163362	C1orf106
222	ENST00000586802.5	1.11E-06	0.00039066	ENSG00000108840	HDAC5
223	ENST00000325495.8	1.12E-06	0.00039066	ENSG00000099783	HNRNPM
224	ENST00000249363.3	1.11E-06	0.00039066	ENSG00000128594	LRRC4
225	ENST00000377263.5	1.18E-06	0.000408306	ENSG00000178585	CTNNBIP1
226	ENST00000400198.7	1.17E-06	0.000408306	ENSG00000134884	ARGLU1
227	ENST00000265471.9	1.18E-06	0.000408306	ENSG00000149541	B3GAT3
228	ENST00000465682.5	1.19E-06	0.000410383	ENSG00000108773	KAT2A
229	ENST00000381280.4	1.24E-06	0.000419211	ENSG00000198732	SMOC1
230	ENST00000372621.8	1.23E-06	0.000419211	ENSG00000171793	CTPS1
231	ENST00000332707.9	1.24E-06	0.000419211	ENSG00000184575	XPOT
232	ENST00000320574.9	1.23E-06	0.000419211	ENSG00000177084	POLE
233	ENST00000357802.6	1.27E-06	0.000426851	ENSG00000182841	RRP7BP
234	ENST00000366812.5	1.28E-06	0.000427119	ENSG00000182827	ACBD3
235	ENST00000374759.7	1.30E-06	0.000430559	ENSG00000157637	SLC38A10
236	ENST00000553532.5	1.30E-06	0.000430559	ENSG00000111602	TIMELESS
237	ENST00000215631.8	1.32E-06	0.000434755	ENSG00000099860	GADD45B
238	ENST00000334661.4	1.32E-06	0.00043524	ENSG00000187091	PLCD1
239	ENST00000339772.9	1.34E-06	0.000438683	ENSG00000149328	GLB1L2
240	ENST00000315323.4	1.35E-06	0.000439251	ENSG00000180340	FZD2
241	ENST00000310325.9	1.37E-06	0.000444946	ENSG00000174080	CTSF
242	ENST00000370938.7	1.38E-06	0.000446451	ENSG00000116761	CTH
243	ENST00000254719.9	1.39E-06	0.000446773	ENSG00000132383	RPA1
244	ENST00000339468.7	1.39E-06	0.000446773	ENSG00000100027	YPEL1
245	ENST00000330651.10	1.40E-06	0.000448327	ENSG00000185386	MAPK11
246	ENST00000565736.1	1.44E-06	0.000457603	ENSG00000079616	KIF22
247	ENST00000300571.6	1.48E-06	0.000469088	ENSG00000167191	GPRC5B
248	ENST00000357484.9	1.48E-06	0.000469088	ENSG00000242498	ARPIN
249	ENST00000452918.6	1.50E-06	0.000471721	ENSG00000064607	SUGP2
250	ENST00000322886.11	1.51E-06	0.000471721	ENSG00000165891	E2F7
251	ENST00000389916.4	1.51E-06	0.000471721	ENSG00000196169	KIF19
252	ENST00000265729.6	1.56E-06	0.000477538	ENSG00000075142	SRI
253	ENST00000210444.5	1.57E-06	0.000477538	ENSG00000095380	NANS
254	ENST00000314797.10	1.55E-06	0.000477538	ENSG00000181789	COPG1
255	ENST00000532692.1	1.56E-06	0.000477538	ENSG00000064199	SPA17
256	ENST00000366991.4	1.56E-06	0.000477538	ENSG00000143476	DTL
257	ENST00000438806.5	1.57E-06	0.000477538	ENSG00000132424	PNISR
258	ENST00000531709.6	1.56E-06	0.000477538	ENSG00000162231	NXF1
259	ENST00000395738.2	1.61E-06	0.000485566	ENSG00000128165	ADM2
260	ENST00000327827.11	1.61E-06	0.000485616	ENSG00000182831	C16orf72
261	ENST00000316157.7	1.64E-06	0.000492812	ENSG00000107929	LARP4B
262	ENST00000360467.5	1.67E-06	0.000493651	ENSG00000134871	COL4A2
263	ENST00000313288.8	1.65E-06	0.000493651	ENSG00000013810	TACC3
264	ENST00000373631.7	1.66E-06	0.000493651	ENSG00000148204	CRB2
265	ENST00000336332.5	1.67E-06	0.000493651	ENSG00000070476	ZXDC
266	ENST00000361427.5	1.68E-06	0.00049476	ENSG00000198830	HMGN2
267	ENST00000261751.7	1.69E-06	0.000495467	ENSG00000117971	CHRNB4
268	ENST00000480614.1	1.69E-06	0.000495467	ENSG00000112715	VEGFA
269	ENST00000265634.3	1.72E-06	0.000500257	ENSG00000106236	NPTX2
270	ENST00000316660.6	1.75E-06	0.000501975	ENSG00000141682	PMAIP1
271	ENST00000334241.8	1.74E-06	0.000501975	ENSG00000186300	ZNF555
272	ENST00000246672.3	1.74E-06	0.000501975	ENSG00000126368	NR1D1
273	ENST00000321998.9	1.73E-06	0.000501975	ENSG00000167186	COQ7
274	ENST00000296181.8	1.76E-06	0.000503758	ENSG00000082781	ITGB5
275	ENST00000446198.5	1.78E-06	0.000506238	ENSG00000128567	PODXL
276	ENST00000352433.9	1.78E-06	0.000506238	ENSG00000164611	PTTG1
277	ENST00000274938.7	1.81E-06	0.000511708	ENSG00000146197	SCUBE3
278	ENST00000634683.1	1.82E-06	0.00051228	ENSG00000282899	E2F2
279	ENST00000361729.2	1.82E-06	0.00051228	ENSG00000007968	E2F2
280	ENST00000557589.1	1.83E-06	0.000513254	ENSG00000111602	TIMELESS
281	ENST00000377113.5	1.91E-06	0.00052968	ENSG00000204682	CASC10
282	ENST00000428760.5	1.92E-06	0.00052968	ENSG00000115966	ATF2
283	ENST00000539664.2	1.92E-06	0.00052968	ENSG00000255690	TRIL
284	ENST00000631057.2	1.93E-06	0.00052968	ENSG00000147257	GPC3
285	ENST00000296417.5	1.92E-06	0.00052968	ENSG00000164032	H2AFZ
286	ENST00000289316.2	1.95E-06	0.00053476	ENSG00000158373	HIST1H2BD
287	ENST00000217426.6	1.99E-06	0.000542001	ENSG00000101444	AHCY
288	ENST00000453258.6	1.99E-06	0.000542088	ENSG00000138185	ENTPD1
289	ENST00000393203.2	2.02E-06	0.000544454	ENSG00000134247	PTGFRN
290	ENST00000273153.9	2.01E-06	0.000544454	ENSG00000144655	CSRNP1
291	ENST00000275036.11	2.02E-06	0.000544454	ENSG00000118418	HMGN3
292	ENST00000311083.9	2.06E-06	0.000548726	ENSG00000175183	CSRP2
293	ENST00000367511.3	2.06E-06	0.000548726	ENSG00000135842	FAM129A
294	ENST00000602402.5	2.06E-06	0.000548726	ENSG00000102580	DNAJC3
295	ENST00000311413.4	2.08E-06	0.000552095	ENSG00000173456	RNF26
296	ENST00000358464.9	2.09E-06	0.000552153	ENSG00000282826	FRG1CP
297	ENST00000338682.7	2.10E-06	0.000554899	ENSG00000189127	ANKRD34B
298	ENST00000461988.5	2.13E-06	0.000558917	ENSG00000127948	POR
299	ENST00000303714.8	2.16E-06	0.000566925	ENSG00000169604	ANTXR1
300	ENST00000305632.9	2.17E-06	0.000567422	ENSG00000106638	TBL2
301	ENST00000329565.5	2.18E-06	0.000567482	ENSG00000184602	SNN
302	ENST00000313056.9	2.20E-06	0.000569088	ENSG00000181396	OGFOD3
303	ENST00000392038.6	2.21E-06	0.000569088	ENSG00000105221	AKT2
304	ENST00000579913.5	2.21E-06	0.000569088	ENSG00000214425	LRRC37A4P
305	ENST00000403663.6	2.22E-06	0.000569152	ENSG00000100106	TRIOBP
306	ENST00000433473.7	2.25E-06	0.000569355	ENSG00000131238	PPT1
307	ENST00000439080.6	2.24E-06	0.000569355	ENSG00000120948	TARDBP
308	ENST00000356674.7	2.22E-06	0.000569355	ENSG00000122566	HNRNPA2B1
309	ENST00000262460.4	2.24E-06	0.000569355	ENSG00000101003	GINS1
310	ENST00000617199.1	2.27E-06	0.000571747	ENSG00000140545	MFGE8
311	ENST00000526049.5	2.27E-06	0.000571747	ENSG00000131871	VIMP
312	ENST00000507004.1	2.31E-06	0.000579201	ENSG00000112972	HMGCS1
313	ENST00000359543.7	2.31E-06	0.000579428	ENSG00000213853	EMP2
314	ENST00000216605.12	2.33E-06	0.00058017	ENSG00000100714	MTHFD1
315	ENST00000377044.8	2.33E-06	0.00058017	ENSG00000135048	TMEM2
316	ENST00000317702.9	2.34E-06	0.000580397	ENSG00000176014	TUBB6
317	ENST00000260356.5	2.35E-06	0.000580397	ENSG00000137801	THBS1
318	ENST00000574816.5	2.36E-06	0.000582168	ENSG00000007168	PAFAH1B1
319	ENST00000337843.6	2.40E-06	0.000583835	ENSG00000133466	C1QTNF6
320	ENST00000227868.8	2.40E-06	0.000583835	ENSG00000110435	PDHX
321	ENST00000300738.9	2.39E-06	0.000583835	ENSG00000167325	RRM1
322	ENST00000360612.4	2.39E-06	0.000583835	ENSG00000198355	PIM3
323	ENST00000308987.5	2.44E-06	0.000585851	ENSG00000173207	CKS1B
324	ENST00000430246.6	2.43E-06	0.000585851	ENSG00000092199	HNRNPC
325	ENST00000371674.7	2.44E-06	0.000585851	ENSG00000244687	UBE2V1
326	ENST00000332235.7	2.44E-06	0.000585851	ENSG00000183186	C2CD4C
327	ENST00000432996.2	2.45E-06	0.000587016	ENSG00000214826	DDX12P
328	ENST00000342175.11	2.47E-06	0.000588794	ENSG00000283186	TTN
329	ENST00000283179.13	2.49E-06	0.000591186	ENSG00000153187	HNRNPU
330	ENST00000369912.2	2.49E-06	0.000591186	ENSG00000007350	TKTL1
331	ENST00000300302.9	2.50E-06	0.000591186	ENSG00000051108	HERPUD1
332	ENST00000488433.5	2.52E-06	0.000593512	ENSG00000178028	DMAP1
333	ENST00000349655.8	2.55E-06	0.000600875	ENSG00000152795	HNRNPDL
334	ENST00000333762.5	2.59E-06	0.000607192	ENSG00000184897	H1FX
335	ENST00000360468.7	2.62E-06	0.000612681	ENSG00000196547	MAN2A2
336	ENST00000216733.7	2.63E-06	0.000613523	ENSG00000100842	EFS
337	ENST00000305386.3	2.67E-06	0.00061722	ENSG00000168282	MGAT2
338	ENST00000483871.6	2.68E-06	0.00061722	ENSG00000124193	SRSF6
339	ENST00000243253.7	2.67E-06	0.00061722	ENSG00000058262	SEC61A1
340	ENST00000407004.7	2.68E-06	0.00061722	ENSG00000129351	ILF3
341	ENST00000275517.7	2.69E-06	0.000617384	ENSG00000146670	CDCA5
342	ENST00000619300.4	2.71E-06	0.000619813	ENSG00000121390	PSPC1
343	ENST00000263370.2	2.73E-06	0.000623358	ENSG00000086544	ITPKC
344	ENST00000300682.14	2.75E-06	0.000623358	ENSG00000167280	ENGASE
345	ENST00000485530.5	2.74E-06	0.000623358	ENSG00000136527	TRA2B
346	ENST00000442628.6	2.75E-06	0.000623694	ENSG00000185189	NRBP2
347	ENST00000591310.1	2.78E-06	0.000627506	ENSG00000130254	SAFB2
348	ENST00000495446.1	2.79E-06	0.000627966	ENSG00000183696	UPP1
349	ENST00000294485.5	2.80E-06	0.000629457	ENSG00000162490	DRAXIN
350	ENST00000391971.6	2.84E-06	0.000634682	ENSG00000168385	2-Sep
351	ENST00000476454.5	2.86E-06	0.000637695	ENSG00000067369	TP53BP1
352	ENST00000341446.8	2.90E-06	0.000644397	ENSG00000184992	BRI3BP
353	ENST00000314103.5	2.93E-06	0.000651277	ENSG00000159259	CHAF1B
354	ENST00000290524.8	3.01E-06	0.000664188	ENSG00000143390	RFX5
355	ENST00000372224.8	3.01E-06	0.000664188	ENSG00000142945	KIF2C
356	ENST00000542958.5	3.03E-06	0.000666643	ENSG00000184575	XPOT
357	ENST00000354336.7	3.09E-06	0.000677152	ENSG00000099942	CRKL
358	ENST00000406323.3	3.09E-06	0.000677152	ENSG00000183579	ZNRF3
359	ENST00000519824.6	3.11E-06	0.000678717	ENSG00000153310	FAM49B
360	ENST00000484256.1	3.14E-06	0.000682396	ENSG00000100219	XBP1
361	ENST00000254657.7	3.14E-06	0.000682396	ENSG00000132326	PER2
362	ENST00000375249.4	3.17E-06	0.000685311	ENSG00000130956	HABP4
363	ENST00000260113.6	3.18E-06	0.00068544	ENSG00000137558	PI15
364	ENST00000375011.3	3.19E-06	0.000685837	ENSG00000119514	GALNT12
365	ENST00000555085.1	3.23E-06	0.00069404	ENSG00000170348	TMED10
366	ENST00000592224.5	3.28E-06	0.000699854	ENSG00000160633	SAFB
367	ENST00000485303.5	3.28E-06	0.000699854	ENSG00000177707	NECTIN3
368	ENST00000554467.5	3.29E-06	0.000701092	ENSG00000182199	SHMT2
369	ENST00000595087.5	3.32E-06	0.000704042	ENSG00000011243	AKAP8L
370	ENST00000475367.1	3.34E-06	0.000704562	ENSG00000197694	SPTAN1
371	ENST00000474597.5	3.33E-06	0.000704562	ENSG00000124783	SSR1
372	ENST00000476901.1	3.35E-06	0.00070522	ENSG00000100416	TRMU
373	ENST00000319121.3	3.39E-06	0.000712144	ENSG00000178502	KLHL11
374	ENST00000227507.2	3.43E-06	0.000716961	ENSG00000110092	CCND1
375	ENST00000383794.6	3.43E-06	0.000716961	ENSG00000154781	CCDC174
376	ENST00000494255.5	3.46E-06	0.00072031	ENSG00000164548	TRA2A
377	ENST00000374299.7	3.48E-06	0.000723648	ENSG00000165349	SLC7A3
378	ENST00000455976.6	3.51E-06	0.000726897	ENSG00000128951	DUT
379	ENST00000394434.6	3.55E-06	0.000730629	ENSG00000133706	LARS
380	ENST00000290374.4	3.58E-06	0.000730629	ENSG00000159248	GJD2
381	ENST00000538167.2	3.55E-06	0.000730629	ENSG00000096093	EFHC1
382	ENST00000555004.2	3.58E-06	0.000730629	ENSG00000227051	C14orf132
383	ENST00000295927.3	3.57E-06	0.000730629	ENSG00000163661	PTX3
384	ENST00000258607.9	3.55E-06	0.000730629	ENSG00000136108	CKAP2
385	ENST00000426094.5	3.60E-06	0.000731778	ENSG00000007392	LUC7L
386	ENST00000376030.6	3.61E-06	0.000732819	ENSG00000189337	KAZN
387	ENST00000349995.9	3.68E-06	0.000744858	ENSG00000136152	COG3
388	ENST00000300093.8	3.71E-06	0.000749211	ENSG00000166851	PLK1
389	ENST00000249356.3	3.75E-06	0.000754832	ENSG00000128590	DNAJB9
390	ENST00000373055.5	3.77E-06	0.000757879	ENSG00000134690	CDCA8
391	ENST00000432648.7	3.82E-06	0.000760823	ENSG00000174574	AKIRIN1
392	ENST00000332810.3	3.80E-06	0.000760823	ENSG00000181026	AEN
393	ENST00000264028.4	3.81E-06	0.000760823	ENSG00000095139	ARCN1
394	ENST00000367734.3	3.83E-06	0.000760823	ENSG00000177468	OLIG3
395	ENST00000370316.7	3.86E-06	0.000765471	ENSG00000101198	NKAIN4
396	ENST00000291691.11	3.93E-06	0.000777485	ENSG00000160298	C21orf58
397	ENST00000543365.5	3.95E-06	0.000780426	ENSG00000180448	ARHGAP45
398	ENST00000405876.8	3.97E-06	0.00078151	ENSG00000139437	TCHP
399	ENST00000371327.2	4.02E-06	0.000789306	ENSG00000119969	HELLS
400	ENST00000445950.2	4.04E-06	0.000790716	ENSG00000078140	UBE2K
401	ENST00000291232.4	4.07E-06	0.000793008	ENSG00000159958	TNFRSF13C
402	ENST00000261834.9	4.07E-06	0.000793008	ENSG00000066739	ATG2B
403	ENST00000269919.10	4.09E-06	0.0007949	ENSG00000130517	PGPEP1
404	ENST00000371741.5	4.11E-06	0.00079649	ENSG00000158445	KCNB1
405	ENST00000358372.8	4.14E-06	0.000799361	ENSG00000146457	WTAP
406	ENST00000307584.5	4.13E-06	0.000799361	ENSG00000170681	MURC
407	ENST00000343348.10	4.16E-06	0.00080079	ENSG00000092421	SEMA6A
408	ENST00000338825.4	4.18E-06	0.000803358	ENSG00000187840	EIF4EBP1
409	ENST00000311893.13	4.24E-06	0.00081179	ENSG00000136003	ISCU
410	ENST00000423485.5	4.25E-06	0.00081179	ENSG00000131747	TOP2A
411	ENST00000394053.6	4.29E-06	0.000816447	ENSG00000065911	MTHFD2
412	ENST00000344425.7	4.29E-06	0.000816447	ENSG00000075043	KCNQ2
413	ENST00000531338.5	4.35E-06	0.000823267	ENSG00000151498	ACAD8
414	ENST00000375820.8	4.35E-06	0.000823267	ENSG00000187498	COL4A1
415	ENST00000623876.1	4.36E-06	0.000823721	ENSG00000175197	DDIT3
416	ENST00000272065.9	4.40E-06	0.000828208	ENSG00000143727	ACP1
417	ENST00000534837.5	4.43E-06	0.000831984	ENSG00000139200	PIANP
418	ENST00000617998.4	4.45E-06	0.000831984	ENSG00000181222	POLR2A
419	ENST00000324460.6	4.45E-06	0.000831984	ENSG00000044574	HSPA5
420	ENST00000607833.5	4.49E-06	0.000832565	ENSG00000204256	BRD2
421	ENST00000383566.8	4.51E-06	0.000832565	ENSG00000206481	MDC1
422	ENST00000451311.6	4.50E-06	0.000832565	ENSG00000205542	TMSB4X
423	ENST00000635101.1	4.50E-06	0.000832565	ENSG00000136021	SCYL2
424	ENST00000369486.7	4.52E-06	0.000832565	ENSG00000143061	IGSF3
425	ENST00000520884.5	4.50E-06	0.000832565	ENSG00000137055	PLAA
426	ENST00000366645.1	4.54E-06	0.000835602	ENSG00000116903	EXOC8
427	ENST00000313432.5	4.64E-06	0.000841092	ENSG00000174437	ATP2A2
428	ENST00000358171.7	4.65E-06	0.000841092	ENSG00000149257	SERPINH1
429	ENST00000548202.5	4.64E-06	0.000841092	ENSG00000166986	MARS
430	ENST00000356575.8	4.63E-06	0.000841092	ENSG00000162591	MEGF6
431	ENST00000247191.6	4.62E-06	0.000841092	ENSG00000126787	DLGAP5
432	ENST00000283006.6	4.64E-06	0.000841092	ENSG00000153044	CENPH
433	ENST00000274606.7	4.64E-06	0.000841092	ENSG00000145912	NHP2
434	ENST00000488642.6	4.75E-06	0.000858012	ENSG00000002016	RAD52
435	ENST00000320805.8	4.79E-06	0.000863252	ENSG00000176953	NFATC2IP
436	ENST00000444878.5	4.82E-06	0.000864754	ENSG00000131051	RBM39
437	ENST00000371429.3	4.82E-06	0.000864754	ENSG00000058804	NDC1
438	ENST00000432126.6	4.89E-06	0.000874309	ENSG00000081791	KIAA0141
439	ENST00000360586.7	4.92E-06	0.000877835	ENSG00000198554	WDHD1
440	ENST00000361875.7	4.94E-06	0.00087941	ENSG00000196428	TSC22D2
441	ENST00000370267.1	5.02E-06	0.000889179	ENSG00000117505	DR1
442	ENST00000559465.1	5.01E-06	0.000889179	ENSG00000103855	CD276
443	ENST00000392748.5	5.08E-06	0.000897925	ENSG00000110002	VWA5A
444	ENST00000375534.7	5.11E-06	0.000899812	ENSG00000117122	MFAP2
445	ENST00000340353.11	5.12E-06	0.000899812	ENSG00000166575	TMEM135
446	ENST00000361951.4	5.13E-06	0.000899812	ENSG00000117593	DARS2
447	ENST00000589851.1	5.13E-06	0.000899812	ENSG00000105426	PTPRS
448	ENST00000231134.7	5.21E-06	0.000902767	ENSG00000113209	PCDHB5
449	ENST00000332582.4	5.18E-06	0.000902767	ENSG00000184194	GPR173
450	ENST00000322213.8	5.22E-06	0.000902767	ENSG00000072501	SMC1A
451	ENST00000357585.3	5.17E-06	0.000902767	ENSG00000180616	SSTR2
452	ENST00000564678.1	5.21E-06	0.000902767	ENSG00000051108	HERPUD1
453	ENST00000194155.6	5.21E-06	0.000902767	ENSG00000112852	PCDHB2
454	ENST00000305885.2	5.25E-06	0.000903296	ENSG00000168496	FEN1
455	ENST00000296509.10	5.24E-06	0.000903296	ENSG00000164109	MAD2L1
456	ENST00000406925.5	5.26E-06	0.000903296	ENSG00000242028	HYPK
457	ENST00000319420.3	5.32E-06	0.00091149	ENSG00000180730	SHISA2
458	ENST00000372927.5	5.34E-06	0.00091149	ENSG00000102384	CENPI
459	ENST00000376495.4	5.34E-06	0.00091149	ENSG00000165312	OTUD1
460	ENST00000496459.2	5.44E-06	0.000924131	ENSG00000147274	RBMX
461	ENST00000448469.7	5.43E-06	0.000924131	ENSG00000100626	GALNT16
462	ENST00000571495.1	5.50E-06	0.000932754	ENSG00000007168	PAFAH1B1
463	ENST00000341259.6	5.57E-06	0.000941821	ENSG00000111252	SH2B3
464	ENST00000506231.5	5.77E-06	0.000973429	ENSG00000133706	LARS
465	ENST00000285679.10	5.79E-06	0.00097526	ENSG00000155313	USP25
466	ENST00000359678.9	5.82E-06	0.000978395	ENSG00000198130	HIBCH
467	ENST00000449376.5	5.86E-06	0.000978395	ENSG00000177479	ARIH2
468	ENST00000468812.5	5.83E-06	0.000978395	ENSG00000196262	PPIA
469	ENST00000347869.7	5.85E-06	0.000978395	ENSG00000003756	RBM5
470	ENST00000542575.6	5.87E-06	0.000978792	ENSG00000105281	SLC1A5
471	ENST00000166345.7	5.92E-06	0.000984561	ENSG00000071539	TRIP13
472	ENST00000559249.5	5.98E-06	0.000992074	ENSG00000100664	EIF5
473	ENST00000456764.1	6.02E-06	0.000996797	ENSG00000115457	IGFBP2
474	ENST00000433197.3	6.05E-06	0.000999707	ENSG00000178607	ERN1
475	ENST00000267814.13	6.09E-06	0.001004371	ENSG00000140263	SORD
476	ENST00000310775.11	6.13E-06	0.001008454	ENSG00000140525	FANCI
477	ENST00000366955.7	6.19E-06	0.00101611	ENSG00000117724	CENPF
478	ENST00000602300.5	6.26E-06	0.001026697	ENSG00000152795	HNRNPDL
479	ENST00000324472.8	6.30E-06	0.001030538	ENSG00000177990	DPY19L2
480	ENST00000634910.1	6.32E-06	0.001031022	ENSG00000274290	HIST1H2BE
481	ENST00000568223.6	6.33E-06	0.00103103	ENSG00000103260	METRN
482	ENST00000482504.1	6.41E-06	0.001042311	ENSG00000097033	SH3GLB1
483	ENST00000261254.7	6.46E-06	0.001043704	ENSG00000118971	CCND2
484	ENST00000478828.1	6.44E-06	0.001043704	ENSG00000134684	YARS
485	ENST00000379561.5	6.46E-06	0.001043704	ENSG00000150907	FOXO1
486	ENST00000381989.3	6.48E-06	0.001044106	ENSG00000102699	PARP4
487	ENST00000290378.4	6.54E-06	0.001052322	ENSG00000159251	ACTC1
488	ENST00000609078.1	6.61E-06	0.001058484	ENSG00000007168	PAFAH1B1
489	ENST00000249373.7	6.60E-06	0.001058484	ENSG00000128602	SMO
490	ENST00000325307.11	6.62E-06	0.001059042	ENSG00000029993	HMGB3
491	ENST00000233813.4	6.68E-06	0.001065768	ENSG00000115461	IGFBP5
492	ENST00000392521.6	6.70E-06	0.001066097	ENSG00000122966	CIT
493	ENST00000498615.1	6.71E-06	0.001066097	ENSG00000116729	WLS
494	ENST00000310351.8	6.73E-06	0.001066783	ENSG00000175455	CCDC14
495	ENST00000371384.3	6.76E-06	0.001069879	ENSG00000124098	FAM210B
496	ENST00000274031.7	6.79E-06	0.001071024	ENSG00000145391	SETD7
497	ENST00000487416.6	6.79E-06	0.001071024	ENSG00000214046	SMIM7
498	ENST00000489244.1	6.83E-06	0.001073788	ENSG00000206530	CFAP44
499	ENST00000282928.4	6.85E-06	0.001075411	ENSG00000152977	ZIC1
500	ENST00000448127.1	6.86E-06	0.00107559	ENSG00000070669	ASNS
501	ENST00000615253.4	6.91E-06	0.001077967	ENSG00000274205	MAPK15
502	ENST00000338033.8	6.91E-06	0.001077967	ENSG00000181085	MAPK15
503	ENST00000379542.9	6.92E-06	0.001078137	ENSG00000137210	TMEM14B
504	ENST00000264709.7	7.06E-06	0.001097783	ENSG00000119772	DNMT3A
505	ENST00000376945.3	7.08E-06	0.001098235	ENSG00000125285	SOX21
506	ENST00000368848.6	7.11E-06	0.001100211	ENSG00000143367	TUFT1
507	ENST00000604689.1	7.16E-06	0.001107116	ENSG00000074935	TUBE1
508	ENST00000258341.4	7.20E-06	0.001109034	ENSG00000135862	LAMC1
509	ENST00000395340.5	7.21E-06	0.001109034	ENSG00000101191	DIDO1
510	ENST00000301634.11	7.25E-06	0.00111083	ENSG00000167900	TK1
511	ENST00000353234.4	7.26E-06	0.00111083	ENSG00000165138	ANKS6
512	ENST00000542398.1	7.26E-06	0.00111083	ENSG00000082458	DLG3
513	ENST00000311322.8	7.28E-06	0.001111399	ENSG00000175445	LPL
514	ENST00000450791.6	7.35E-06	0.00111994	ENSG00000090615	GOLGA3
515	ENST00000321765.9	7.38E-06	0.001122502	ENSG00000076382	SPAG5
516	ENST00000357214.5	7.59E-06	0.001147953	ENSG00000116560	SFPQ
517	ENST00000310513.9	7.57E-06	0.001147953	ENSG00000149187	CELF1
518	ENST00000454323.1	7.59E-06	0.001147953	ENSG00000036257	CUL3
519	ENST00000586544.1	7.65E-06	0.001155209	ENSG00000129351	ILF3
520	ENST00000555818.5	7.68E-06	0.001156945	ENSG00000197555	SIPA1L1
521	ENST00000373064.9	7.70E-06	0.001158173	ENSG00000148339	SLC25A25
522	ENST00000452445.6	7.74E-06	0.001161101	ENSG00000184613	NELL2
523	ENST00000343788.10	7.78E-06	0.001165352	ENSG00000165416	SUGT1
524	ENST00000252599.8	7.80E-06	0.001165704	ENSG00000130309	COLGALT1
525	ENST00000284727.8	7.86E-06	0.001172849	ENSG00000154518	ATP5G3
526	ENST00000396821.7	7.87E-06	0.001172849	ENSG00000100201	DDX17
527	ENST00000606961.1	7.96E-06	0.001173412	ENSG00000137288	UQCC2
528	ENST00000369983.3	8.00E-06	0.001173412	ENSG00000107862	GBF1
529	ENST00000548630.1	7.99E-06	0.001173412	ENSG00000166986	MARS
530	ENST00000321612.6	7.93E-06	0.001173412	ENSG00000178445	GLDC
531	ENST00000295926.7	7.94E-06	0.001173412	ENSG00000163660	CCNL1
532	ENST00000300413.9	7.97E-06	0.001173412	ENSG00000167088	SNRPD1
533	ENST00000375400.7	8.00E-06	0.001173412	ENSG00000197321	SVIL
534	ENST00000276461.9	7.98E-06	0.001173412	ENSG00000147475	ERLIN2
535	ENST00000301678.7	8.04E-06	0.0011768	ENSG00000167930	FAM234A
536	ENST00000313349.3	8.08E-06	0.00117936	ENSG00000179833	SERTAD2
537	ENST00000411546.3	8.08E-06	0.00117936	ENSG00000183604	SMG1P5
538	ENST00000281031.4	8.15E-06	0.001182546	ENSG00000151366	NDUFC2
539	ENST00000263245.9	8.15E-06	0.001182546	ENSG00000242247	ARFGAP3
540	ENST00000222690.10	8.12E-06	0.001182546	ENSG00000105968	H2AFV
541	ENST00000463199.1	8.27E-06	0.001196048	ENSG00000067048	DDX3Y
542	ENST00000262394.6	8.27E-06	0.001196048	ENSG00000109046	WSB1
543	ENST00000286918.8	8.32E-06	0.001196345	ENSG00000156381	ANKRD9
544	ENST00000310380.10	8.31E-06	0.001196345	ENSG00000173950	XXYLT1
545	ENST00000631790.1	8.32E-06	0.001196345	ENSG00000282269	PRR4
546	ENST00000379938.6	8.35E-06	0.001197729	ENSG00000124782	RREB1
547	ENST00000380250.7	8.39E-06	0.00119789	ENSG00000073910	FRY
548	ENST00000382252.5	8.38E-06	0.00119789	ENSG00000205903	ZNF316
549	ENST00000253686.6	8.39E-06	0.00119789	ENSG00000131368	MRPS25
550	ENST00000532642.5	8.45E-06	0.001203996	ENSG00000117410	ATP6V0B
551	ENST00000251472.8	8.52E-06	0.001211542	ENSG00000105613	MAST1
552	ENST00000375765.4	8.58E-06	0.001213584	ENSG00000165023	DIRAS2
553	ENST00000556825.5	8.57E-06	0.001213584	ENSG00000182199	SHMT2
554	ENST00000583313.6	8.59E-06	0.001213584	ENSG00000265241	RBM8A
555	ENST00000263681.6	8.60E-06	0.001213584	ENSG00000077514	POLD3
556	ENST00000337827.8	8.73E-06	0.00122868	ENSG00000100626	GALNT16
557	ENST00000160827.8	8.75E-06	0.00122868	ENSG00000079616	KIF22
558	ENST00000360652.6	8.75E-06	0.00122868	ENSG00000132635	PCED1A
559	ENST00000381342.6	8.81E-06	0.001229749	ENSG00000125835	SNRPB
560	ENST00000308418.8	8.80E-06	0.001229749	ENSG00000172922	RNASEH2C
561	ENST00000369014.9	8.84E-06	0.001229749	ENSG00000143420	ENSA
562	ENST00000220913.9	8.80E-06	0.001229749	ENSG00000104472	CHRAC1
563	ENST00000263826.9	8.83E-06	0.001229749	ENSG00000117020	AKT3
564	ENST00000504260.5	8.85E-06	0.00122986	ENSG00000121073	SLC35B1
565	ENST00000319170.9	8.88E-06	0.001231709	ENSG00000173166	RAPH1
566	ENST00000297689.3	8.96E-06	0.001237349	ENSG00000165030	NFIL3
567	ENST00000508319.1	8.97E-06	0.001237349	ENSG00000112972	HMGCS1
568	ENST00000392951.8	8.94E-06	0.001237349	ENSG00000149591	TAGLN
569	ENST00000374525.5	9.08E-06	0.001241117	ENSG00000241978	AKAP2
570	ENST00000239938.4	9.05E-06	0.001241117	ENSG00000120738	EGR1
571	ENST00000369002.8	9.04E-06	0.001241117	ENSG00000025796	SEC63
572	ENST00000374980.2	9.08E-06	0.001241117	ENSG00000125977	EIF2S2
573	ENST00000521861.5	9.02E-06	0.001241117	ENSG00000147677	EIF3H
574	ENST00000395751.8	9.17E-06	0.001246717	ENSG00000072310	SREBF1
575	ENST00000296233.3	9.15E-06	0.001246717	ENSG00000163884	KLF15
576	ENST00000262293.8	9.14E-06	0.001246717	ENSG00000068489	PRR11
577	ENST00000538172.1	9.21E-06	0.001248602	ENSG00000111790	FGFR1OP2
578	ENST00000284486.8	9.21E-06	0.001248602	ENSG00000154319	FAM167A
579	ENST00000299092.3	9.27E-06	0.001253722	ENSG00000166073	GPR176
580	ENST00000464395.1	9.30E-06	0.001256147	ENSG00000107959	PITRM1
581	ENST00000511316.1	9.35E-06	0.001258887	ENSG00000164104	HMGB2
582	ENST00000349004.5	9.39E-06	0.001258887	ENSG00000101079	NDRG3
583	ENST00000354631.7	9.37E-06	0.001258887	ENSG00000107614	TRDMT1
584	ENST00000409804.5	9.38E-06	0.001258887	ENSG00000065911	MTHFD2
585	ENST00000420124.2	9.40E-06	0.001258887	ENSG00000272333	KMT2B
586	ENST00000398261.5	9.50E-06	0.001270482	ENSG00000109685	WHSC1
587	ENST00000476391.5	9.53E-06	0.001272362	ENSG00000116478	HDAC1
588	ENST00000370620.5	9.55E-06	0.001272737	ENSG00000129675	ARHGEF6
589	ENST00000227756.4	9.60E-06	0.001273987	ENSG00000110328	GALNT18
590	ENST00000280551.10	9.61E-06	0.001273987	ENSG00000150961	SEC24D
591	ENST00000428708.6	9.60E-06	0.001273987	ENSG00000175866	BAIAP2
592	ENST00000242804.8	9.66E-06	0.001278495	ENSG00000198342	ZNF442
593	ENST00000530769.5	9.74E-06	0.001287465	ENSG00000166012	TAF1D
594	ENST00000539345.6	9.78E-06	0.001288394	ENSG00000141556	TBCD
595	ENST00000369800.5	9.78E-06	0.001288394	ENSG00000214357	NEURL1B
596	ENST00000290039.5	9.80E-06	0.001288815	ENSG00000158966	CACHD1
597	ENST00000319211.4	9.87E-06	0.00129129	ENSG00000181104	F2R
598	ENST00000340368.8	9.87E-06	0.00129129	ENSG00000186480	INSIG1
599	ENST00000615671.1	9.84E-06	0.00129129	ENSG00000104064	GABPB1
600	ENST00000309993.2	9.98E-06	0.001303299	ENSG00000174579	MSL2
601	ENST00000476243.5	1.01E-05	0.001314962	ENSG00000166582	CENPV
602	ENST00000313552.10	1.01E-05	0.001316082	ENSG00000168395	ING5
603	ENST00000635036.1	1.03E-05	0.00132464	ENSG00000283085	TPBG
604	ENST00000334304.9	1.03E-05	0.00132464	ENSG00000152990	ADGRA3
605	ENST00000214869.6	1.03E-05	0.00132464	ENSG00000099203	TMED1
606	ENST00000369750.3	1.03E-05	0.00132464	ENSG00000146242	TPBG
607	ENST00000315091.7	1.02E-05	0.00132464	ENSG00000120948	TARDBP
608	ENST00000238647.4	1.02E-05	0.00132464	ENSG00000119669	IRF2BPL
609	ENST00000344293.5	1.03E-05	0.00132464	ENSG00000165632	TAF3
610	ENST00000244043.4	1.03E-05	0.001327004	ENSG00000124212	PTGIS
611	ENST00000308527.5	1.03E-05	0.001327004	ENSG00000173548	SNX33
612	ENST00000265077.7	1.04E-05	0.00132783	ENSG00000038427	VCAN
613	ENST00000348520.10	1.04E-05	0.00132783	ENSG00000126214	KLC1
614	ENST00000262947.7	1.05E-05	0.001337077	ENSG00000074842	MYDGF
615	ENST00000354906.7	1.05E-05	0.001341346	ENSG00000154305	MIA3
616	ENST00000315948.10	1.05E-05	0.001341346	ENSG00000176018	LYSMD3
617	ENST00000322957.6	1.06E-05	0.001346498	ENSG00000129654	FOXJ1
618	ENST00000216122.8	1.07E-05	0.001348124	ENSG00000100297	MCM5
619	ENST00000249014.4	1.06E-05	0.001348124	ENSG00000128283	CDC42EP1
620	ENST00000331569.5	1.07E-05	0.001349307	ENSG00000183779	ZNF703
621	ENST00000337714.7	1.07E-05	0.001349307	ENSG00000121057	AKAP1
622	ENST00000378387.3	1.09E-05	0.001365979	ENSG00000137135	ARHGEF39
623	ENST00000272732.10	1.09E-05	0.001365979	ENSG00000144306	SCRN3
624	ENST00000325327.3	1.09E-05	0.001365979	ENSG00000176619	LMNB2
625	ENST00000368654.7	1.09E-05	0.001365979	ENSG00000148773	MKI67
626	ENST00000458212.1	1.10E-05	0.001374314	ENSG00000173744	AGFG1
627	ENST00000219070.8	1.10E-05	0.001374664	ENSG00000087245	MMP2
628	ENST00000265028.7	1.11E-05	0.001389407	ENSG00000090520	DNAJB11
629	ENST00000329421.7	1.12E-05	0.001389423	ENSG00000175130	MARCKSL1
630	ENST00000311481.10	1.12E-05	0.001396869	ENSG00000174903	RAB1B
631	ENST00000341681.9	1.13E-05	0.001405025	ENSG00000011566	MAP4K3
632	ENST00000405995.5	1.14E-05	0.001405407	ENSG00000130723	PRRC2B
633	ENST00000497922.1	1.13E-05	0.001405407	ENSG00000171988	JMJD1C
634	ENST00000223642.2	1.14E-05	0.001408649	ENSG00000106804	C5
635	ENST00000308497.8	1.14E-05	0.001409656	ENSG00000173320	STOX2
636	ENST00000528586.1	1.15E-05	0.001414347	ENSG00000172375	C2CD2L
637	ENST00000340700.9	1.15E-05	0.00141763	ENSG00000100433	KCNK10
638	ENST00000374358.4	1.15E-05	0.00141763	ENSG00000183726	TMEM50A
639	ENST00000314666.10	1.16E-05	0.001422103	ENSG00000178921	PFAS
640	ENST00000335327.5	1.17E-05	0.001427451	ENSG00000132970	WASF3
641	ENST00000545888.6	1.18E-05	0.001445004	ENSG00000166986	MARS
642	ENST00000331821.7	1.19E-05	0.00144604	ENSG00000099901	RANBP1
643	ENST00000270722.9	1.19E-05	0.00144604	ENSG00000142611	PRDM16
644	ENST00000602540.5	1.19E-05	0.001447514	ENSG00000139289	PHLDA1
645	ENST00000370053.2	1.20E-05	0.001448554	ENSG00000197457	STMN3
646	ENST00000275418.11	1.20E-05	0.001448554	ENSG00000117868	ESYT2
647	ENST00000376980.7	1.20E-05	0.001448554	ENSG00000136770	DNAJC1
648	ENST00000619301.4	1.20E-05	0.001449241	ENSG00000152242	C18orf25
649	ENST00000400217.6	1.20E-05	0.001451855	ENSG00000101266	CSNK2A1
650	ENST00000380518.7	1.21E-05	0.001462294	ENSG00000139219	COL2A1
651	ENST00000423777.6	1.22E-05	0.001464451	ENSG00000169136	ATF5
652	ENST00000528814.1	1.22E-05	0.001465647	ENSG00000147535	PLPP5
653	ENST00000264249.7	1.23E-05	0.001469246	ENSG00000115526	CHST10
654	ENST00000358410.7	1.23E-05	0.001469246	ENSG00000138346	DNA2
655	ENST00000219837.11	1.23E-05	0.001471635	ENSG00000103550	KNOP1
656	ENST00000397276.6	1.23E-05	0.001471635	ENSG00000100836	PABPN1
657	ENST00000370508.5	1.24E-05	0.001475058	ENSG00000120053	GOT1
658	ENST00000370339.7	1.26E-05	0.001486095	ENSG00000149658	YTHDF1
659	ENST00000563887.1	1.25E-05	0.001486095	ENSG00000260548	RP6-24A23.6
660	ENST00000411986.6	1.25E-05	0.001486095	ENSG00000116761	CTH
661	ENST00000296412.12	1.26E-05	0.001486095	ENSG00000197894	ADH5
662	ENST00000373091.7	1.25E-05	0.001486095	ENSG00000163873	GRIK3
663	ENST00000397558.6	1.26E-05	0.001488112	ENSG00000135127	BICDL1
664	ENST00000316623.9	1.26E-05	0.001491655	ENSG00000166147	FBN1
665	ENST00000590083.5	1.27E-05	0.001495575	ENSG00000099625	CBARP
666	ENST00000507773.5	1.27E-05	0.001495575	ENSG00000121073	SLC35B1
667	ENST00000299563.4	1.29E-05	0.00151228	ENSG00000166439	RNF169
668	ENST00000268607.9	1.29E-05	0.001512785	ENSG00000140941	MAP1LC3B
669	ENST00000505658.5	1.30E-05	0.001522039	ENSG00000108848	LUC7L3
670	ENST00000226091.2	1.30E-05	0.001522039	ENSG00000108947	EFNB3
671	ENST00000262207.8	1.32E-05	0.001545108	ENSG00000121005	CRISPLD1
672	ENST00000563158.1	1.33E-05	0.00154617	ENSG00000069345	DNAJA2
673	ENST00000302101.5	1.34E-05	0.00154617	ENSG00000171786	NHLH1
674	ENST00000392876.7	1.33E-05	0.00154617	ENSG00000111696	NT5DC3
675	ENST00000299163.6	1.34E-05	0.00154617	ENSG00000166135	HIF1AN
676	ENST00000235090.9	1.34E-05	0.00154617	ENSG00000116455	WDR77
677	ENST00000273590.3	1.34E-05	0.00154617	ENSG00000145022	TCTA
678	ENST00000285018.4	1.33E-05	0.00154617	ENSG00000154764	WNT7A
679	ENST00000357164.3	1.34E-05	0.00154617	ENSG00000196743	GM2A
680	ENST00000284551.10	1.33E-05	0.00154617	ENSG00000154370	TRIM11
681	ENST00000254821.10	1.35E-05	0.001554257	ENSG00000132485	ZRANB2
682	ENST00000581150.6	1.36E-05	0.001555913	ENSG00000104904	OAZ1
683	ENST00000595831.5	1.36E-05	0.001555913	ENSG00000104980	TIMM44
684	ENST00000478910.5	1.36E-05	0.001557902	ENSG00000080845	DLGAP4
685	ENST00000395284.7	1.37E-05	0.001565102	ENSG00000170312	CDK1
686	ENST00000314744.5	1.37E-05	0.001565102	ENSG00000181965	NEUROG1
687	ENST00000472894.1	1.37E-05	0.001565102	ENSG00000196305	IARS
688	ENST00000442488.6	1.37E-05	0.001565102	ENSG00000128610	FEZF1
689	ENST00000303562.8	1.38E-05	0.001571391	ENSG00000170345	FOS
690	ENST00000438704.6	1.39E-05	0.001572991	ENSG00000164104	HMGB2
691	ENST00000302326.4	1.40E-05	0.001585845	ENSG00000169184	MN1
692	ENST00000591416.5	1.40E-05	0.001589307	ENSG00000141644	MBD1
693	ENST00000330459.7	1.41E-05	0.001590396	ENSG00000182481	KPNA2
694	ENST00000376759.7	1.41E-05	0.001590396	ENSG00000102317	RBM3
695	ENST00000493598.6	1.41E-05	0.001590396	ENSG00000163714	U2SURP
696	ENST00000602616.6	1.43E-05	0.001605403	ENSG00000187951	ARHGAP11B
697	ENST00000492779.5	1.43E-05	0.001605403	ENSG00000131051	RBM39
698	ENST00000323180.10	1.43E-05	0.001610577	ENSG00000135365	PHF21A
699	ENST00000522136.5	1.44E-05	0.001613233	ENSG00000113240	CLK4
700	ENST00000527401.5	1.45E-05	0.00162158	ENSG00000135365	PHF21A
701	ENST00000227266.9	1.46E-05	0.001625971	ENSG00000109861	CTSC
702	ENST00000591120.1	1.46E-05	0.001625971	ENSG00000130254	SAFB2
703	ENST00000631021.2	1.47E-05	0.001627274	ENSG00000281540	RCC2
704	ENST00000303236.7	1.47E-05	0.001627274	ENSG00000172071	EIF2AK3
705	ENST00000375436.8	1.47E-05	0.001627274	ENSG00000179051	RCC2
706	ENST00000313367.6	1.46E-05	0.001627274	ENSG00000070882	OSBPL3
707	ENST00000296701.10	1.47E-05	0.001628518	ENSG00000145868	FBXO38
708	ENST00000483894.5	1.48E-05	0.001635222	ENSG00000162613	FUBP1
709	ENST00000434813.3	1.48E-05	0.001635798	ENSG00000013441	CLK1
710	ENST00000507089.5	1.49E-05	0.001638705	ENSG00000109814	UGDH
711	ENST00000354666.3	1.49E-05	0.001639563	ENSG00000197977	ELOVL2
712	ENST00000290341.7	1.49E-05	0.001639563	ENSG00000159217	IGF2BP1
713	ENST00000274382.8	1.49E-05	0.001639563	ENSG00000145721	LIX1
714	ENST00000380172.8	1.49E-05	0.001639563	ENSG00000099810	MTAP
715	ENST00000317479.7	1.50E-05	0.001640331	ENSG00000176894	PXMP2
716	ENST00000561903.6	1.50E-05	0.001643623	ENSG00000197774	EME2
717	ENST00000307771.7	1.50E-05	0.001643623	ENSG00000169249	ZRSR2
718	ENST00000287598.10	1.51E-05	0.001650945	ENSG00000156970	BUB1B
719	ENST00000256545.8	1.52E-05	0.001655332	ENSG00000134153	EMC7
720	ENST00000422745.5	1.52E-05	0.001655332	ENSG00000070669	ASNS
721	ENST00000360629.3	1.52E-05	0.001655332	ENSG00000134884	ARGLU1
722	ENST00000338910.8	1.53E-05	0.001655332	ENSG00000121390	PSPC1
723	ENST00000456380.5	1.53E-05	0.001661917	ENSG00000136527	TRA2B
724	ENST00000338447.10	1.55E-05	0.001673853	ENSG00000110583	NAA40
725	ENST00000570069.5	1.55E-05	0.001677862	ENSG00000197774	EME2
726	ENST00000397062.7	1.56E-05	0.001685599	ENSG00000116044	NFE2L2
727	ENST00000495390.1	1.57E-05	0.001687835	ENSG00000090520	DNAJB11
728	ENST00000479237.5	1.57E-05	0.001687835	ENSG00000148341	SH3GLB2
729	ENST00000427120.6	1.58E-05	0.001692009	ENSG00000114770	ABCC5
730	ENST00000514463.1	1.57E-05	0.001692009	ENSG00000070476	ZXDC
731	ENST00000290551.4	1.58E-05	0.001697723	ENSG00000159388	BTG2
732	ENST00000284000.8	1.60E-05	0.001710953	ENSG00000153879	CEBPG
733	ENST00000273853.10	1.61E-05	0.001720033	ENSG00000145241	CENPC
734	ENST00000394249.7	1.61E-05	0.001721627	ENSG00000198901	PRC1
735	ENST00000434316.6	1.62E-05	0.001724473	ENSG00000150403	TMCO3
736	ENST00000318978.5	1.62E-05	0.001724473	ENSG00000178531	CTXN1
737	ENST00000342085.8	1.63E-05	0.001734256	ENSG00000140992	PDPK1
738	ENST00000609928.5	1.64E-05	0.001734256	ENSG00000169905	TOR1AIP2
739	ENST00000559844.5	1.64E-05	0.001734256	ENSG00000028528	SNX1
740	ENST00000272438.8	1.64E-05	0.001734256	ENSG00000144043	TEX261
741	ENST00000230419.8	1.64E-05	0.001736163	ENSG00000112655	PTK7
742	ENST00000483468.5	1.65E-05	0.001736163	ENSG00000135597	REPS1
743	ENST00000616623.4	1.65E-05	0.001736163	ENSG00000121671	CRY2
744	ENST00000260983.7	1.64E-05	0.001736163	ENSG00000138411	HECW2
745	ENST00000358655.8	1.67E-05	0.001748969	ENSG00000140105	WARS
746	ENST00000568294.5	1.66E-05	0.001748969	ENSG00000166503	RP11-382A20.3
747	ENST00000537515.5	1.68E-05	0.001758354	ENSG00000077232	DNAJC10
748	ENST00000372397.6	1.69E-05	0.001765558	ENSG00000157514	TSC22D3
749	ENST00000621158.4	1.70E-05	0.001771781	ENSG00000157613	CREB3L1
750	ENST00000426263.7	1.69E-05	0.001771781	ENSG00000117394	SLC2A1
751	ENST00000519716.6	1.71E-05	0.001781111	ENSG00000130477	UNC13A
752	ENST00000311601.5	1.72E-05	0.001782745	ENSG00000174705	SH3PXD2B
753	ENST00000332853.8	1.72E-05	0.001782745	ENSG00000165633	VSTM4
754	ENST00000560582.2	1.71E-05	0.001782745	ENSG00000151575	TEX9
755	ENST00000502553.5	1.72E-05	0.001784904	ENSG00000113407	TARS
756	ENST00000621075.1	1.73E-05	0.001785442	ENSG00000130703	OSBPL2
757	ENST00000419235.6	1.72E-05	0.001785442	ENSG00000112679	DUSP22
758	ENST00000428210.5	1.74E-05	0.001797845	ENSG00000082898	XPO1
759	ENST00000359540.7	1.75E-05	0.001802911	ENSG00000186716	BCR
760	ENST00000538780.1	1.75E-05	0.001803439	ENSG00000139438	FAM222A
761	ENST00000336079.7	1.78E-05	0.001825732	ENSG00000067048	DDX3Y
762	ENST00000333003.9	1.78E-05	0.001825732	ENSG00000120798	NR2C1
763	ENST00000273047.8	1.78E-05	0.001825732	ENSG00000144566	RAB5A
764	ENST00000308110.8	1.78E-05	0.001825732	ENSG00000172732	MUS81
765	ENST00000232905.3	1.78E-05	0.001827231	ENSG00000114784	EIF1B
766	ENST00000261313.2	1.79E-05	0.001833179	ENSG00000089220	PEBP1
767	ENST00000264657.9	1.79E-05	0.001833294	ENSG00000168610	STAT3
768	ENST00000577454.5	1.81E-05	0.001844794	ENSG00000188895	MSL1
769	ENST00000397679.5	1.81E-05	0.001848455	ENSG00000160298	C21orf58
770	ENST00000266646.2	1.82E-05	0.001849686	ENSG00000139269	INHBE
771	ENST00000001146.6	1.83E-05	0.001855786	ENSG00000003137	CYP26B1
772	ENST00000424877.5	1.83E-05	0.001858025	ENSG00000055609	KMT2C
773	ENST00000266732.8	1.84E-05	0.00186008	ENSG00000120802	TMPO
774	ENST00000322623.9	1.84E-05	0.00186008	ENSG00000175792	RUVBL1
775	ENST00000595146.1	1.85E-05	0.00186583	ENSG00000171606	ZNF274
776	ENST00000246314.10	1.85E-05	0.00186583	ENSG00000126070	AGO3
777	ENST00000258955.6	1.85E-05	0.00186583	ENSG00000136444	RSAD1
778	ENST00000632953.1	1.85E-05	0.00186583	ENSG00000278191	CARS
779	ENST00000400191.7	1.86E-05	0.00186678	ENSG00000133216	EPHB2
780	ENST00000356244.7	1.86E-05	0.001870058	ENSG00000100401	RANGAP1
781	ENST00000225688.3	1.87E-05	0.001872106	ENSG00000108551	RASD1
782	ENST00000302327.3	1.87E-05	0.001875563	ENSG00000168556	ING2
783	ENST00000282561.3	1.88E-05	0.001878576	ENSG00000152661	GJA1
784	ENST00000542922.5	1.88E-05	0.001880528	ENSG00000168003	SLC3A2
785	ENST00000377093.8	1.88E-05	0.001880528	ENSG00000054523	KIF1B
786	ENST00000634348.1	1.89E-05	0.001882323	ENSG00000116350	SRSF4
787	ENST00000560937.1	1.89E-05	0.001886205	ENSG00000140545	MFGE8
788	ENST00000220562.8	1.90E-05	0.001889124	ENSG00000012232	EXTL3
789	ENST00000265770.11	1.91E-05	0.001892418	ENSG00000015592	STMN4
790	ENST00000455205.5	1.91E-05	0.001895949	ENSG00000071553	ATP6AP1
791	ENST00000637938.1	1.93E-05	0.001912764	ENSG00000153404	PLEKHG4B
792	ENST00000556260.6	1.93E-05	0.001912768	ENSG00000078304	PPP2R5C
793	ENST00000310046.8	1.94E-05	0.001917508	ENSG00000173914	RBM4B
794	ENST00000336292.10	1.95E-05	0.001926002	ENSG00000182253	SYNM
795	ENST00000523505.1	1.96E-05	0.001933182	ENSG00000253276	CCDC71L
796	ENST00000397512.7	1.97E-05	0.001939678	ENSG00000177042	TMEM80
797	ENST00000498157.1	1.97E-05	0.001940072	ENSG00000143126	CELSR2
798	ENST00000378633.5	1.98E-05	0.001946884	ENSG00000008128	CDK11A
799	ENST00000376729.9	1.99E-05	0.001948647	ENSG00000101940	WDR13
800	ENST00000265641.9	1.99E-05	0.001948647	ENSG00000110090	CPT1A
801	ENST00000325144.4	2.00E-05	0.001949774	ENSG00000181472	ZBTB2
802	ENST00000377190.7	1.99E-05	0.001949774	ENSG00000162298	SYVN1
803	ENST00000373236.1	2.03E-05	0.001979431	ENSG00000079332	SAR1A
804	ENST00000523482.5	2.04E-05	0.001987427	ENSG00000147416	ATP6V1B2
805	ENST00000299164.3	2.05E-05	0.001988053	ENSG00000166106	ADAMTS15
806	ENST00000205194.4	2.04E-05	0.001988053	ENSG00000090971	NAT14
807	ENST00000245479.2	2.06E-05	0.002002774	ENSG00000125398	SOX9
808	ENST00000400137.8	2.07E-05	0.002009956	ENSG00000088832	FKBP1A
809	ENST00000375749.7	2.08E-05	0.002014058	ENSG00000101346	POFUT1
810	ENST00000394013.6	2.09E-05	0.002017584	ENSG00000181852	RNF41
811	ENST00000260453.3	2.09E-05	0.002017584	ENSG00000138587	MNS1
812	ENST00000513628.5	2.10E-05	0.002028347	ENSG00000133835	HSD17B4
813	ENST00000485275.2	2.12E-05	0.002039958	ENSG00000121931	LRIF1
814	ENST00000271764.6	2.12E-05	0.002044316	ENSG00000143486	EIF2D
815	ENST00000367006.8	2.13E-05	0.002050694	ENSG00000117625	RCOR3
816	ENST00000216019.11	2.14E-05	0.002056607	ENSG00000100201	DDX17
817	ENST00000241337.8	2.15E-05	0.002063311	ENSG00000213366	GSTM2
818	ENST00000358232.10	2.15E-05	0.002063311	ENSG00000134759	ELP2
819	ENST00000369923.4	2.17E-05	0.002066783	ENSG00000031698	SARS
820	ENST00000263634.7	2.16E-05	0.002066783	ENSG00000115239	ASB3
821	ENST00000253329.2	2.16E-05	0.002066783	ENSG00000131013	PPIL4
822	ENST00000381318.7	2.18E-05	0.002075689	ENSG00000205726	ITSN1
823	ENST00000371442.3	2.18E-05	0.00207753	ENSG00000125352	RNF113A
824	ENST00000463563.6	2.19E-05	0.00207753	ENSG00000163714	U2SURP
825	ENST00000454079.5	2.21E-05	0.002092525	ENSG00000004534	RBM6
826	ENST00000300086.4	2.21E-05	0.002092525	ENSG00000166848	TERF2IP
827	ENST00000591863.1	2.21E-05	0.002092525	ENSG00000121289	CEP89
828	ENST00000261797.6	2.20E-05	0.002092525	ENSG00000070614	NDST1
829	ENST00000294728.6	2.22E-05	0.002094015	ENSG00000162692	VCAM1
830	ENST00000311502.11	2.22E-05	0.002094205	ENSG00000196642	RABL6
831	ENST00000299213.9	2.23E-05	0.002102586	ENSG00000166173	LARP6
832	ENST00000472523.1	2.23E-05	0.002102586	ENSG00000152977	ZIC1
833	ENST00000574007.5	2.24E-05	0.002103749	ENSG00000185624	P4HB
834	ENST00000218516.3	2.26E-05	0.002111711	ENSG00000102393	GLA
835	ENST00000393800.6	2.26E-05	0.002111711	ENSG00000110075	PPP6R3
836	ENST00000388820.4	2.25E-05	0.002111711	ENSG00000136378	ADAMTS7
837	ENST00000356189.5	2.26E-05	0.002111711	ENSG00000176244	ACBD7
838	ENST00000511865.6	2.25E-05	0.002111711	ENSG00000129625	REEP5
839	ENST00000458669.1	2.25E-05	0.002111711	ENSG00000244257	PKD1P1
840	ENST00000361953.7	2.27E-05	0.002115305	ENSG00000111206	FOXM1
841	ENST00000350690.9	2.27E-05	0.002118339	ENSG00000183048	SLC25A10
842	ENST00000250113.11	2.29E-05	0.002129581	ENSG00000129245	FXR2
843	ENST00000478753.4	2.29E-05	0.002129581	ENSG00000179918	SEPHS2
844	ENST00000298355.7	2.29E-05	0.002129581	ENSG00000100505	TRIM9
845	ENST00000619579.1	2.30E-05	0.002132216	ENSG00000184277	TM2D3
846	ENST00000301057.7	2.30E-05	0.00213457	ENSG00000167543	TP53I13
847	ENST00000314355.6	2.31E-05	0.002136745	ENSG00000123975	CKS2
848	ENST00000002165.10	2.32E-05	0.002139057	ENSG00000001036	FUCA2
849	ENST00000473202.1	2.34E-05	0.002159866	ENSG00000135919	SERPINE2
850	ENST00000488380.5	2.35E-05	0.00216864	ENSG00000010322	NISCH
851	ENST00000486360.1	2.37E-05	0.002182648	ENSG00000143847	PPFIA4
852	ENST00000301738.8	2.38E-05	0.002186955	ENSG00000167977	KCTD5
853	ENST00000512392.5	2.38E-05	0.002188198	ENSG00000153922	CHD1
854	ENST00000372815.1	2.39E-05	0.002191117	ENSG00000116990	MYCL
855	ENST00000240100.6	2.40E-05	0.002198688	ENSG00000120875	DUSP4
856	ENST00000434821.5	2.40E-05	0.002198688	ENSG00000115170	ACVR1
857	ENST00000544898.5	2.41E-05	0.002204197	ENSG00000166548	TK2
858	ENST00000338660.5	2.42E-05	0.002208511	ENSG00000179403	VWA1
859	ENST00000380071.7	2.42E-05	0.002210744	ENSG00000133119	RFC3
860	ENST00000265465.7	2.44E-05	0.002218443	ENSG00000014138	POLA2
861	ENST00000360997.6	2.44E-05	0.002222442	ENSG00000168309	FAM107A
862	ENST00000253803.6	2.45E-05	0.002222442	ENSG00000275949	RP11-619A10.1
863	ENST00000357799.8	2.45E-05	0.002226299	ENSG00000163535	SGO2
864	ENST00000374695.7	2.46E-05	0.002230397	ENSG00000142798	HSPG2
865	ENST00000602725.5	2.48E-05	0.002244245	ENSG00000184007	PTP4A2
866	ENST00000373313.2	2.48E-05	0.002244245	ENSG00000204103	MAFB
867	ENST00000310942.8	2.49E-05	0.002252124	ENSG00000173894	CBX2
868	ENST00000301019.8	2.50E-05	0.002257698	ENSG00000167513	CDT1
869	ENST00000312397.9	2.51E-05	0.002258802	ENSG00000175467	SART1
870	ENST00000296350.9	2.53E-05	0.002272705	ENSG00000163975	MELTF
871	ENST00000497048.5	2.53E-05	0.002272705	ENSG00000136826	KLF4
872	ENST00000361189.6	2.53E-05	0.002272705	ENSG00000198961	PJA2
873	ENST00000335574.9	2.53E-05	0.002272705	ENSG00000101294	HM13
874	ENST00000358546.3	2.54E-05	0.002274321	ENSG00000080371	RAB21
875	ENST00000321562.8	2.55E-05	0.002286949	ENSG00000141756	FKBP10
876	ENST00000484667.2	2.58E-05	0.002302496	ENSG00000188290	HES4
877	ENST00000263390.7	2.58E-05	0.002302496	ENSG00000105085	MED26
878	ENST00000262809.8	2.59E-05	0.002308153	ENSG00000105656	ELL
879	ENST00000394048.9	2.59E-05	0.002311304	ENSG00000139641	ESYT1
880	ENST00000317276.8	2.60E-05	0.002314604	ENSG00000179094	PER1
881	ENST00000372836.4	2.60E-05	0.002314604	ENSG00000137161	CNPY3
882	ENST00000376887.8	2.61E-05	0.002317324	ENSG00000125257	ABCC4
883	ENST00000631006.2	2.61E-05	0.002317324	ENSG00000196935	SRGAP1
884	ENST00000312405.10	2.62E-05	0.002326274	ENSG00000130559	CAMSAP1
885	ENST00000371666.7	2.63E-05	0.002329754	ENSG00000131724	IL13RA1
886	ENST00000302692.6	2.63E-05	0.002329754	ENSG00000171612	SLC25A33
887	ENST00000486166.1	2.64E-05	0.002335152	ENSG00000102054	RBBP7
888	ENST00000312584.3	2.66E-05	0.002347639	ENSG00000173530	TNFRSF10D
889	ENST00000612785.1	2.68E-05	0.002363583	ENSG00000066279	ASPM
890	ENST00000354309.4	2.70E-05	0.002380449	ENSG00000204524	ZNF805
891	ENST00000340160.7	2.72E-05	0.002389975	ENSG00000157570	TSPAN18
892	ENST00000399300.6	2.73E-05	0.002390105	ENSG00000183808	RBM12B
893	ENST00000319248.12	2.72E-05	0.002390105	ENSG00000117450	PRDX1
894	ENST00000260731.4	2.73E-05	0.002390105	ENSG00000138160	KIF11
895	ENST00000479950.5	2.74E-05	0.002396014	ENSG00000124596	OARD1
896	ENST00000338970.10	2.74E-05	0.002396014	ENSG00000188846	RPL14
897	ENST00000488174.5	2.75E-05	0.002404008	ENSG00000147162	OGT
898	ENST00000371217.9	2.77E-05	0.002416426	ENSG00000119977	TCTN3
899	ENST00000391411.9	2.77E-05	0.002416426	ENSG00000212719	C17orf51
900	ENST00000380087.6	2.78E-05	0.002420143	ENSG00000102054	RBBP7
901	ENST00000425571.6	2.79E-05	0.002424897	ENSG00000228628	ATF6B
902	ENST00000377575.2	2.80E-05	0.002430199	ENSG00000182952	HMGN4
903	ENST00000378308.6	2.82E-05	0.002438693	ENSG00000124486	USP9X
904	ENST00000427136.6	2.82E-05	0.002438693	ENSG00000234539	ATF6B
905	ENST00000257696.4	2.81E-05	0.002438693	ENSG00000135245	HILPDA
906	ENST00000375203.7	2.82E-05	0.002438693	ENSG00000213676	ATF6B
907	ENST00000606738.2	2.84E-05	0.00244554	ENSG00000269113	TRABD2B
908	ENST00000369838.5	2.84E-05	0.00244554	ENSG00000198478	SH3BGRL2
909	ENST00000008527.9	2.83E-05	0.00244554	ENSG00000008405	CRY1
910	ENST00000240423.8	2.86E-05	0.002462318	ENSG00000121152	NCAPH
911	ENST00000568956.1	2.87E-05	0.002468057	ENSG00000261221	ZNF865
912	ENST00000215980.9	2.88E-05	0.002468297	ENSG00000100162	CENPM
913	ENST00000370094.7	2.89E-05	0.002468297	ENSG00000198408	MGEA5
914	ENST00000524502.2	2.88E-05	0.002468297	ENSG00000151498	ACAD8
915	ENST00000481690.2	2.88E-05	0.002468297	ENSG00000125772	GPCPD1
916	ENST00000394329.7	2.88E-05	0.002468297	ENSG00000196159	FAT4
917	ENST00000609740.1	2.90E-05	0.002476742	ENSG00000163006	CCDC138
918	ENST00000302165.4	2.91E-05	0.002480615	ENSG00000170604	IRF2BP1
919	ENST00000595245.1	2.92E-05	0.002481471	ENSG00000099326	MZF1
920	ENST00000636709.1	2.92E-05	0.002481471	ENSG00000175344	CHRNA7
921	ENST00000493232.5	2.92E-05	0.002481471	ENSG00000106009	BRAT1
922	ENST00000312828.3	2.91E-05	0.002481471	ENSG00000176641	RNF152
923	ENST00000382788.7	2.93E-05	0.002484138	ENSG00000159788	RGS12
924	ENST00000455036.7	2.93E-05	0.002484138	ENSG00000205189	ZBTB10
925	ENST00000427224.6	2.93E-05	0.002484138	ENSG00000101670	LIPG
926	ENST00000520580.5	2.94E-05	0.002485965	ENSG00000153914	SREK1
927	ENST00000393766.6	2.95E-05	0.002492874	ENSG00000052802	MSMO1
928	ENST00000461133.7	2.95E-05	0.002492874	ENSG00000163539	CLASP2
929	ENST00000377843.6	2.96E-05	0.002495144	ENSG00000113712	CSNK1A1
930	ENST00000287394.9	2.97E-05	0.002499009	ENSG00000156802	ATAD2
931	ENST00000263095.10	2.98E-05	0.002511573	ENSG00000083844	ZNF264
932	ENST00000636453.1	3.00E-05	0.002516953	ENSG00000283510	INO80D
933	ENST00000403263.5	3.00E-05	0.002516953	ENSG00000114933	INO80D
934	ENST00000472510.5	3.01E-05	0.002520849	ENSG00000067048	DDX3Y
935	ENST00000233809.8	3.02E-05	0.002529573	ENSG00000115457	IGFBP2
936	ENST00000006777.10	3.02E-05	0.002529573	ENSG00000005486	RHBDD2
937	ENST00000370963.8	3.03E-05	0.002530486	ENSG00000170899	GSTA4
938	ENST00000396029.7	3.03E-05	0.002530486	ENSG00000101126	ADNP
939	ENST00000394688.7	3.04E-05	0.002530735	ENSG00000166164	BRD7
940	ENST00000312499.5	3.03E-05	0.002530735	ENSG00000175643	RMI2
941	ENST00000328046.8	3.04E-05	0.002530735	ENSG00000174010	KLHL15
942	ENST00000357877.6	3.05E-05	0.002532696	ENSG00000135622	SEMA4F
943	ENST00000462436.1	3.05E-05	0.002533682	ENSG00000070669	ASNS
944	ENST00000318407.4	3.06E-05	0.002542726	ENSG00000176720	BOK
945	ENST00000395802.7	3.08E-05	0.002555411	ENSG00000124164	VAPB
946	ENST00000327111.7	3.11E-05	0.00256912	ENSG00000175745	NR2F1
947	ENST00000216513.4	3.10E-05	0.00256912	ENSG00000100625	SIX4
948	ENST00000534003.5	3.14E-05	0.002584992	ENSG00000109920	FNBP4
949	ENST00000302350.4	3.14E-05	0.002584992	ENSG00000168564	CDKN2AIP
950	ENST00000302450.10	3.14E-05	0.002584992	ENSG00000169607	CKAP2L
951	ENST00000304858.6	3.13E-05	0.002584992	ENSG00000170606	HSPA4
952	ENST00000242994.3	3.16E-05	0.002594399	ENSG00000123307	NEUROD4
953	ENST00000247461.8	3.16E-05	0.002594399	ENSG00000127022	CANX
954	ENST00000456315.6	3.16E-05	0.002594399	ENSG00000024526	DEPDC1
955	ENST00000275227.8	3.16E-05	0.002594399	ENSG00000146409	SLC18B1
956	ENST00000357736.8	3.19E-05	0.002610634	ENSG00000197063	MAFG
957	ENST00000247291.7	3.19E-05	0.002610634	ENSG00000126878	AIF1L
958	ENST00000370103.8	3.20E-05	0.002613856	ENSG00000118733	OLFM3
959	ENST00000389231.9	3.22E-05	0.002625242	ENSG00000111667	USP5
960	ENST00000447966.6	3.22E-05	0.002625242	ENSG00000110881	ASIC1
961	ENST00000216294.4	3.22E-05	0.002625242	ENSG00000023608	SNAPC1
962	ENST00000225969.8	3.24E-05	0.002628699	ENSG00000108826	MRPL27
963	ENST00000375533.5	3.24E-05	0.002628699	ENSG00000095739	BAMBI
964	ENST00000593886.1	3.23E-05	0.002628699	ENSG00000198521	ZNF43
965	ENST00000553635.5	3.24E-05	0.002628699	ENSG00000100650	SRSF5
966	ENST00000244741.9	3.25E-05	0.002632683	ENSG00000124762	CDKN1A
967	ENST00000270223.6	3.25E-05	0.002632856	ENSG00000185800	DMWD
968	ENST00000234626.10	3.28E-05	0.002657626	ENSG00000097046	CDC7
969	ENST00000308595.9	3.29E-05	0.00265892	ENSG00000173020	GRK2
970	ENST00000466242.5	3.31E-05	0.002671054	ENSG00000168137	SETD5
971	ENST00000346436.10	3.32E-05	0.002678872	ENSG00000011021	CLCN6
972	ENST00000427836.7	3.33E-05	0.002683814	ENSG00000178385	PLEKHM3
973	ENST00000300146.9	3.35E-05	0.002697402	ENSG00000166889	PATL1
974	ENST00000352301.8	3.37E-05	0.002712268	ENSG00000138668	HNRNPD
975	ENST00000359546.8	3.38E-05	0.002713381	ENSG00000145920	CPLX2
976	ENST00000228345.9	3.38E-05	0.002713381	ENSG00000002016	RAD52
977	ENST00000259008.6	3.40E-05	0.002723654	ENSG00000136492	BRIP1
978	ENST00000316594.5	3.42E-05	0.002736767	ENSG00000126945	HNRNPH2
979	ENST00000370509.4	3.42E-05	0.002736767	ENSG00000143162	CREG1
980	ENST00000272102.9	3.42E-05	0.002736767	ENSG00000143761	ARF1
981	ENST00000317233.8	3.44E-05	0.002743368	ENSG00000144218	AFF3
982	ENST00000382247.5	3.49E-05	0.002780725	ENSG00000163257	DCAF16
983	ENST00000425248.5	3.50E-05	0.002787707	ENSG00000158623	COPG2
984	ENST00000572447.5	3.50E-05	0.002787707	ENSG00000129195	FAM64A
985	ENST00000325390.7	3.52E-05	0.002796317	ENSG00000180178	FAR2P1
986	ENST00000404034.5	3.54E-05	0.002805388	ENSG00000100425	BRD1
987	ENST00000228872.8	3.54E-05	0.002805388	ENSG00000111276	CDKN1B
988	ENST00000377988.6	3.53E-05	0.002805388	ENSG00000137103	TMEM8B
989	ENST00000239223.3	3.55E-05	0.002808455	ENSG00000120129	DUSP1
990	ENST00000320717.7	3.55E-05	0.00280972	ENSG00000115419	GLS
991	ENST00000313341.3	3.56E-05	0.002811714	ENSG00000178403	NEUROG2
992	ENST00000615315.1	3.56E-05	0.002812867	ENSG00000174456	C12orf76
993	ENST00000469838.5	3.57E-05	0.002812867	ENSG00000003756	RBM5
994	ENST00000330871.3	3.59E-05	0.002830035	ENSG00000184557	SOCS3
995	ENST00000552695.5	3.61E-05	0.002843188	ENSG00000198855	FICD
996	ENST00000401730.5	3.61E-05	0.00284319	ENSG00000104852	SNRNP70
997	ENST00000452385.5	3.62E-05	0.002844193	ENSG00000177479	ARIH2
998	ENST00000504142.1	3.62E-05	0.002844648	ENSG00000164199	ADGRV1
999	ENST00000409753.7	3.63E-05	0.00284934	ENSG00000189159	HN1
1000	ENST00000461407.5	3.66E-05	0.002866834	ENSG00000082898	XPO1
1001	ENST00000344120.4	3.67E-05	0.00286971	ENSG00000187678	SPRY4
1002	ENST00000287156.8	3.68E-05	0.002870621	ENSG00000156587	UBE2L6
1003	ENST00000407215.7	3.68E-05	0.002870621	ENSG00000141295	SCRN2
1004	ENST00000378714.7	3.67E-05	0.002870621	ENSG00000065328	MCM10
1005	ENST00000406386.7	3.69E-05	0.002874479	ENSG00000100106	TRIOBP
1006	ENST00000317216.2	3.70E-05	0.002877413	ENSG00000179388	EGR3
1007	ENST00000395344.7	3.70E-05	0.002877413	ENSG00000110514	MADD
1008	ENST00000340541.4	3.75E-05	0.002900682	ENSG00000101558	VAPA
1009	ENST00000409631.5	3.75E-05	0.002900682	ENSG00000079156	OSBPL6
1010	ENST00000378075.3	3.74E-05	0.002900682	ENSG00000204950	LRRC10B
1011	ENST00000585953.5	3.75E-05	0.002900682	ENSG00000141425	RPRD1A
1012	ENST00000375169.7	3.75E-05	0.002900682	ENSG00000196632	WNK3
1013	ENST00000485732.5	3.74E-05	0.002900682	ENSG00000177943	MAMDC4
1014	ENST00000225927.6	3.76E-05	0.002901275	ENSG00000108784	NAGLU
1015	ENST00000332780.3	3.76E-05	0.002901275	ENSG00000185909	KLHDC8B
1016	ENST00000356205.8	3.77E-05	0.002903786	ENSG00000143570	SLC39A1
1017	ENST00000473583.1	3.77E-05	0.002903889	ENSG00000168237	GLYCTK
1018	ENST00000283033.9	3.77E-05	0.002903889	ENSG00000153066	TXNDC11
1019	ENST00000332598.6	3.79E-05	0.002910211	ENSG00000184840	TMED9
1020	ENST00000470040.5	3.80E-05	0.002915729	ENSG00000143774	GUK1
1021	ENST00000366923.7	3.80E-05	0.002915729	ENSG00000136628	EPRS
1022	ENST00000379412.9	3.80E-05	0.002915729	ENSG00000134333	LDHA
1023	ENST00000448876.5	3.83E-05	0.002930647	ENSG00000073803	MAP3K13
1024	ENST00000261921.7	3.83E-05	0.002930647	ENSG00000129038	LOXL1
1025	ENST00000323468.9	3.83E-05	0.002930647	ENSG00000178202	KDELC2
1026	ENST00000633194.1	3.85E-05	0.002933063	ENSG00000274205	MAPK15
1027	ENST00000316843.8	3.84E-05	0.002933063	ENSG00000131899	LLGL1
1028	ENST00000341460.5	3.85E-05	0.002933063	ENSG00000097096	SYDE2
1029	ENST00000533830.1	3.85E-05	0.002933063	ENSG00000181085	MAPK15
1030	ENST00000450114.6	3.86E-05	0.002936156	ENSG00000166483	WEE1
1031	ENST00000372491.3	3.88E-05	0.002947625	ENSG00000188483	IER5L
1032	ENST00000477523.1	3.94E-05	0.002986545	ENSG00000015568	RGPD5
1033	ENST00000463822.1	3.94E-05	0.002986545	ENSG00000183054	RGPD6
1034	ENST00000393160.7	3.95E-05	0.002990291	ENSG00000160271	RALGDS
1035	ENST00000309739.5	3.96E-05	0.00299155	ENSG00000172602	RND1
1036	ENST00000354619.9	3.96E-05	0.00299155	ENSG00000086619	ERO1B
1037	ENST00000583408.5	3.96E-05	0.002995019	ENSG00000108651	UTP6
1038	ENST00000380244.7	3.97E-05	0.002996856	ENSG00000089280	FUS
1039	ENST00000216471.4	3.98E-05	0.002999561	ENSG00000100583	SAMD15
1040	ENST00000310924.6	3.99E-05	0.003002871	ENSG00000167291	TBC1D16
1041	ENST00000264956.10	3.99E-05	0.003004439	ENSG00000072840	EVC
1042	ENST00000510927.5	4.00E-05	0.003008921	ENSG00000145348	TBCK
1043	ENST00000405392.5	4.01E-05	0.003008921	ENSG00000138031	ADCY3
1044	ENST00000607016.1	4.02E-05	0.003010109	ENSG00000272325	NUDT3
1045	ENST00000001008.5	4.02E-05	0.003010109	ENSG00000004478	FKBP4
1046	ENST00000358701.9	4.02E-05	0.003010109	ENSG00000165661	QSOX2
1047	ENST00000372045.5	4.02E-05	0.00301133	ENSG00000101938	CHRDL1
1048	ENST00000291906.4	4.04E-05	0.003019935	ENSG00000160447	PKN3
1049	ENST00000507359.3	4.06E-05	0.003023657	ENSG00000183775	KCTD16
1050	ENST00000320676.11	4.06E-05	0.003023657	ENSG00000147274	RBMX
1051	ENST00000371222.3	4.06E-05	0.003023657	ENSG00000177606	JUN
1052	ENST00000302017.3	4.05E-05	0.003023657	ENSG00000181444	ZNF467
1053	ENST00000393196.7	4.07E-05	0.003029228	ENSG00000239672	NME1
1054	ENST00000264444.6	4.12E-05	0.003060315	ENSG00000059728	MXD1
1055	ENST00000397224.8	4.14E-05	0.003067238	ENSG00000100350	FOXRED2
1056	ENST00000287538.9	4.14E-05	0.003067238	ENSG00000156925	ZIC3
1057	ENST00000294618.11	4.13E-05	0.003067238	ENSG00000130158	DOCK6
1058	ENST00000409769.6	4.16E-05	0.003082668	ENSG00000013441	CLK1
1059	ENST00000305352.6	4.17E-05	0.003084474	ENSG00000170989	S1PR1
1060	ENST00000433628.2	4.20E-05	0.003098429	ENSG00000148842	CNNM2
1061	ENST00000620214.1	4.20E-05	0.003098429	ENSG00000105443	CYTH2
1062	ENST00000460284.5	4.25E-05	0.003137488	ENSG00000079246	XRCC5
1063	ENST00000600806.5	4.26E-05	0.003137488	ENSG00000099783	HNRNPM
1064	ENST00000261973.11	4.27E-05	0.003144831	ENSG00000119707	RBM25
1065	ENST00000338492.8	4.30E-05	0.003160485	ENSG00000151640	DPYSL4
1066	ENST00000522356.1	4.30E-05	0.00316109	ENSG00000206077	ZDHHC11B
1067	ENST00000603821.1	4.32E-05	0.003168763	ENSG00000109670	FBXW7
1068	ENST00000487404.5	4.33E-05	0.003173618	ENSG00000134684	YARS
1069	ENST00000369905.8	4.33E-05	0.003175123	ENSG00000138107	ACTR1A
1070	ENST00000262717.8	4.37E-05	0.00320121	ENSG00000101542	CDH20
1071	ENST00000306085.10	4.38E-05	0.003203492	ENSG00000169871	TRIM56
1072	ENST00000472018.5	4.40E-05	0.003206192	ENSG00000185324	CDK10
1073	ENST00000219542.3	4.40E-05	0.003206192	ENSG00000103260	METRN
1074	ENST00000595279.1	4.40E-05	0.003206192	ENSG00000167657	DAPK3
1075	ENST00000398844.6	4.40E-05	0.003206192	ENSG00000113615	SEC24A
1076	ENST00000428423.5	4.40E-05	0.003206192	ENSG00000174353	STAG3L3
1077	ENST00000368463.7	4.43E-05	0.003220599	ENSG00000163346	PBXIP1
1078	ENST00000228437.9	4.46E-05	0.003239837	ENSG00000110851	PRDM4
1079	ENST00000289373.4	4.47E-05	0.003244052	ENSG00000158164	TMSB15A
1080	ENST00000223951.10	4.48E-05	0.003249242	ENSG00000107105	ELAVL2
1081	ENST00000253144.13	4.48E-05	0.003249242	ENSG00000130844	ZNF331
1082	ENST00000549154.1	4.49E-05	0.003254522	ENSG00000135476	ESPL1
1083	ENST00000322954.10	4.51E-05	0.003262398	ENSG00000137831	UACA
1084	ENST00000313733.7	4.53E-05	0.00326897	ENSG00000130703	OSBPL2
1085	ENST00000371187.7	4.53E-05	0.00326897	ENSG00000162599	NFIA
1086	ENST00000427476.4	4.53E-05	0.00326897	ENSG00000105443	CYTH2
1087	ENST00000257787.5	4.54E-05	0.00326897	ENSG00000135334	AKIRIN2
1088	ENST00000614397.4	4.56E-05	0.00328071	ENSG00000276726	DNAJA3
1089	ENST00000355296.8	4.56E-05	0.00328071	ENSG00000103423	DNAJA3
1090	ENST00000373719.7	4.57E-05	0.003284444	ENSG00000147162	OGT
1091	ENST00000340941.10	4.58E-05	0.003286958	ENSG00000131844	MCCC2
1092	ENST00000286201.2	4.59E-05	0.003288474	ENSG00000155760	FZD7
1093	ENST00000248054.9	4.59E-05	0.003288474	ENSG00000127511	SIN3B
1094	ENST00000600748.5	4.59E-05	0.003288474	ENSG00000104980	TIMM44
1095	ENST00000490942.1	4.60E-05	0.003292678	ENSG00000164548	TRA2A
1096	ENST00000612582.1	4.62E-05	0.003298631	ENSG00000099954	CECR2
1097	ENST00000303221.9	4.62E-05	0.003298631	ENSG00000170571	EMB
1098	ENST00000216832.8	4.62E-05	0.003299716	ENSG00000100941	PNN
1099	ENST00000467731.1	4.64E-05	0.003310609	ENSG00000156304	SCAF4
1100	ENST00000233379.8	4.65E-05	0.003311124	ENSG00000115042	FAHD2A
1101	ENST00000377670.8	4.65E-05	0.003311124	ENSG00000124440	HIF3A
1102	ENST00000635193.1	4.66E-05	0.003315383	ENSG00000060718	COL11A1
1103	ENST00000338483.6	4.67E-05	0.003318733	ENSG00000185022	MAFF
1104	ENST00000262225.7	4.68E-05	0.003318733	ENSG00000086598	TMED2
1105	ENST00000281821.6	4.68E-05	0.003321666	ENSG00000116106	EPHA4
1106	ENST00000369042.5	4.70E-05	0.00332356	ENSG00000178409	BEND3
1107	ENST00000566749.5	4.69E-05	0.00332356	ENSG00000149923	PPP4C
1108	ENST00000380668.9	4.70E-05	0.003326403	ENSG00000101911	PRPS2
1109	ENST00000373912.7	4.71E-05	0.003329635	ENSG00000117748	RPA2
1110	ENST00000561679.5	4.73E-05	0.003330438	ENSG00000196123	KIAA0895L
1111	ENST00000620489.1	4.73E-05	0.003330438	ENSG00000138835	RGS3
1112	ENST00000357654.7	4.73E-05	0.003330438	ENSG00000012048	BRCA1
1113	ENST00000360409.7	4.72E-05	0.003330438	ENSG00000118257	NRP2
1114	ENST00000584561.1	4.74E-05	0.003331573	ENSG00000178999	AURKB
1115	ENST00000359933.5	4.77E-05	0.003349011	ENSG00000066739	ATG2B
1116	ENST00000262812.8	4.78E-05	0.003354939	ENSG00000105669	COPE
1117	ENST00000348911.10	4.79E-05	0.003358909	ENSG00000100241	SBF1
1118	ENST00000512576.2	4.80E-05	0.003359153	ENSG00000128050	PAICS
1119	ENST00000343813.9	4.80E-05	0.003359153	ENSG00000116237	ICMT
1120	ENST00000511119.1	4.80E-05	0.003360704	ENSG00000038219	BOD1L1
1121	ENST00000359114.8	4.82E-05	0.003364991	ENSG00000273899	NOL12
1122	ENST00000537123.1	4.82E-05	0.003364991	ENSG00000256304	CCDC150P1
1123	ENST00000361833.6	4.83E-05	0.003366565	ENSG00000152092	ASTN1
1124	ENST00000529813.1	4.84E-05	0.003371155	ENSG00000170242	USP47
1125	ENST00000566827.5	4.84E-05	0.003371155	ENSG00000140937	CDH11
1126	ENST00000368097.8	4.85E-05	0.003371155	ENSG00000158710	TAGLN2
1127	ENST00000439326.7	4.86E-05	0.003379063	ENSG00000223547	ZNF844
1128	ENST00000347739.3	4.89E-05	0.003390242	ENSG00000120889	TNFRSF10B
1129	ENST00000494312.5	4.89E-05	0.003390242	ENSG00000122952	ZWINT
1130	ENST00000406606.7	4.89E-05	0.003390242	ENSG00000160293	VAV2
1131	ENST00000630647.2	4.91E-05	0.003398278	ENSG00000281434	NDUFA10
1132	ENST00000252711.6	4.91E-05	0.003398278	ENSG00000130414	NDUFA10
1133	ENST00000332822.4	4.92E-05	0.003398278	ENSG00000183691	NOG
1134	ENST00000281928.7	4.92E-05	0.003398278	ENSG00000123066	MED13L
1135	ENST00000302274.7	4.95E-05	0.003416978	ENSG00000170522	ELOVL6
1136	ENST00000397359.7	4.98E-05	0.003433283	ENSG00000139880	CDH24
1137	ENST00000361565.8	4.99E-05	0.003435783	ENSG00000198700	IPO9
1138	ENST00000299565.9	4.99E-05	0.003435783	ENSG00000169684	CHRNA5
1139	ENST00000361070.8	5.00E-05	0.003439261	ENSG00000168411	RFWD3
1140	ENST00000449985.6	5.01E-05	0.003444049	ENSG00000179029	TMEM107
1141	ENST00000329271.7	5.02E-05	0.00345029	ENSG00000164284	GRPEL2
1142	ENST00000230301.8	5.03E-05	0.003451023	ENSG00000112539	C6orf118
1143	ENST00000238618.7	5.05E-05	0.003462565	ENSG00000119640	ACYP1
1144	ENST00000463202.5	5.07E-05	0.003470066	ENSG00000105856	HBP1
1145	ENST00000602795.5	5.10E-05	0.003491264	ENSG00000101158	NELFCD
1146	ENST00000485292.1	5.11E-05	0.003494023	ENSG00000188529	SRSF10
1147	ENST00000396148.1	5.13E-05	0.003501028	ENSG00000123080	CDKN2C
1148	ENST00000556808.1	5.18E-05	0.003528333	ENSG00000184205	TSPYL2
1149	ENST00000367033.3	5.17E-05	0.003528333	ENSG00000076356	PLXNA2
1150	ENST00000358227.4	5.17E-05	0.003528333	ENSG00000137038	TMEM261
1151	ENST00000260363.8	5.24E-05	0.003551265	ENSG00000137807	KIF23
1152	ENST00000590258.2	5.23E-05	0.003551265	ENSG00000134779	TPGS2
1153	ENST00000375256.4	5.23E-05	0.003551265	ENSG00000165244	ZNF367
1154	ENST00000409121.6	5.24E-05	0.003551265	ENSG00000144134	RABL2A
1155	ENST00000499247.2	5.23E-05	0.003551265	ENSG00000141232	TOB1
1156	ENST00000441222.7	5.24E-05	0.003551265	ENSG00000109189	USP46
1157	ENST00000392485.2	5.22E-05	0.003551265	ENSG00000161547	SRSF2
1158	ENST00000333129.3	5.30E-05	0.003579702	ENSG00000182263	FIGN
1159	ENST00000371817.7	5.29E-05	0.003579702	ENSG00000130635	COL5A1
1160	ENST00000368655.4	5.32E-05	0.003595821	ENSG00000143614	GATAD2B
1161	ENST00000588350.1	5.36E-05	0.003617041	ENSG00000161082	CELF5
1162	ENST00000406438.4	5.37E-05	0.003617984	ENSG00000176994	SMCR8
1163	ENST00000372281.7	5.37E-05	0.003617984	ENSG00000133678	TMEM254
1164	ENST00000368521.9	5.38E-05	0.003618156	ENSG00000143612	C1orf43
1165	ENST00000619360.4	5.39E-05	0.003618156	ENSG00000146232	NFKBIE
1166	ENST00000381410.4	5.38E-05	0.003618156	ENSG00000178996	SNX18
1167	ENST00000312814.10	5.39E-05	0.003618156	ENSG00000146802	TMEM168
1168	ENST00000549030.1	5.40E-05	0.003619883	ENSG00000179364	PACS2
1169	ENST00000319331.3	5.43E-05	0.003642303	ENSG00000175928	LRRN1
1170	ENST00000242576.6	5.45E-05	0.003645291	ENSG00000076248	UNG
1171	ENST00000370487.4	5.45E-05	0.003645291	ENSG00000101189	MRGBP
1172	ENST00000327268.8	5.47E-05	0.003659733	ENSG00000108932	SLC16A6
1173	ENST00000378116.8	5.49E-05	0.003664334	ENSG00000148468	FAM171A1
1174	ENST00000353341.8	5.50E-05	0.003668939	ENSG00000138668	HNRNPD
1175	ENST00000612932.4	5.52E-05	0.003682337	ENSG00000274211	SOCS7
1176	ENST00000456318.5	5.53E-05	0.003682793	ENSG00000163882	POLR2H
1177	ENST00000372396.3	5.56E-05	0.00369841	ENSG00000066135	KDM4A
1178	ENST00000361093.9	5.59E-05	0.003712761	ENSG00000159131	GART
1179	ENST00000355665.7	5.59E-05	0.003712761	ENSG00000083896	YTHDC1
1180	ENST00000613637.3	5.59E-05	0.003712761	ENSG00000275272	YTHDC1
1181	ENST00000610365.4	5.60E-05	0.003712761	ENSG00000273749	CYFIP1
1182	ENST00000311212.8	5.63E-05	0.003727377	ENSG00000120963	ZNF706
1183	ENST00000231173.5	5.64E-05	0.003727377	ENSG00000113248	PCDHB15
1184	ENST00000449870.5	5.64E-05	0.003727377	ENSG00000129351	ILF3
1185	ENST00000262464.8	5.64E-05	0.003727377	ENSG00000138829	FBN2
1186	ENST00000354724.7	5.66E-05	0.003739175	ENSG00000164683	HEY1
1187	ENST00000403734.2	5.67E-05	0.003745486	ENSG00000234857	HNRNPUL2-BSCL2
1188	ENST00000523116.5	5.69E-05	0.003753343	ENSG00000104660	LEPROTL1
1189	ENST00000429094.6	5.71E-05	0.003765091	ENSG00000184613	NELL2
1190	ENST00000216780.8	5.73E-05	0.003773889	ENSG00000100889	PCK2
1191	ENST00000484167.5	5.74E-05	0.003774565	ENSG00000168385	2-Sep
1192	ENST00000393399.6	5.77E-05	0.003793477	ENSG00000137509	PRCP
1193	ENST00000311459.11	5.80E-05	0.003807861	ENSG00000125375	ATP5S
1194	ENST00000379887.8	5.80E-05	0.003808519	ENSG00000166233	ARIH1
1195	ENST00000576409.5	5.81E-05	0.003811273	ENSG00000123472	ATPAF1
1196	ENST00000344726.9	5.83E-05	0.003815946	ENSG00000118418	HMGN3
1197	ENST00000345365.10	5.84E-05	0.003817108	ENSG00000185379	RAD51D
1198	ENST00000497139.5	5.84E-05	0.003817108	ENSG00000112715	VEGFA
1199	ENST00000215829.7	5.86E-05	0.003831901	ENSG00000100028	SNRPD3
1200	ENST00000243563.7	5.87E-05	0.003834358	ENSG00000077312	SNRPA
1201	ENST00000529977.5	5.89E-05	0.003840547	ENSG00000184014	DENND5A
1202	ENST00000396161.9	5.90E-05	0.003843327	ENSG00000213762	ZNF134
1203	ENST00000635191.1	5.91E-05	0.003843493	ENSG00000282873	BCL7A
1204	ENST00000156825.5	5.91E-05	0.003843493	ENSG00000071655	MBD3
1205	ENST00000538010.5	5.91E-05	0.003843493	ENSG00000110987	BCL7A
1206	ENST00000258662.2	5.92E-05	0.003844919	ENSG00000136159	NUDT15
1207	ENST00000314737.9	5.92E-05	0.003845509	ENSG00000004777	ARHGAP33
1208	ENST00000581185.5	5.93E-05	0.003847457	ENSG00000109046	WSB1
1209	ENST00000481135.1	5.94E-05	0.003847575	ENSG00000036257	CUL3
1210	ENST00000263256.6	5.95E-05	0.003851205	ENSG00000100418	DESI1
1211	ENST00000230431.10	5.95E-05	0.003851205	ENSG00000112667	DNPH1
1212	ENST00000636215.1	5.98E-05	0.00386208	ENSG00000175105	ZNF654
1213	ENST00000264036.5	5.98E-05	0.00386208	ENSG00000076706	MCAM
1214	ENST00000550164.5	5.99E-05	0.003863481	ENSG00000139613	SMARCC2
1215	ENST00000404933.6	5.99E-05	0.0038637	ENSG00000102172	SMS
1216	ENST00000219169.8	6.01E-05	0.003868232	ENSG00000102898	NUTF2
1217	ENST00000520314.2	6.01E-05	0.003868232	ENSG00000214776	RP11-726G1.1
1218	ENST00000537796.1	6.03E-05	0.00386932	ENSG00000089818	NECAP1
1219	ENST00000317945.6	6.02E-05	0.00386932	ENSG00000109881	CCDC34
1220	ENST00000495893.6	6.02E-05	0.00386932	ENSG00000173889	PHC3
1221	ENST00000627745.1	6.05E-05	0.003873556	ENSG00000281665	KIAA1143
1222	ENST00000296121.5	6.05E-05	0.003873556	ENSG00000163807	KIAA1143
1223	ENST00000508361.5	6.04E-05	0.003873556	ENSG00000113407	TARS
1224	ENST00000262027.9	6.09E-05	0.003901203	ENSG00000166986	MARS
1225	ENST00000393386.6	6.12E-05	0.003913973	ENSG00000106278	PTPRZ1
1226	ENST00000633063.1	6.13E-05	0.003916526	ENSG00000033030	ZCCHC8
1227	ENST00000578195.6	6.15E-05	0.003924529	ENSG00000264538	SUZ12P1
1228	ENST00000398168.5	6.16E-05	0.003928071	ENSG00000274276	CBSL
1229	ENST00000286371.7	6.18E-05	0.003936831	ENSG00000069849	ATP1B3
1230	ENST00000477922.3	6.19E-05	0.003936972	ENSG00000257743	MGAM2
1231	ENST00000447699.6	6.20E-05	0.003936972	ENSG00000196305	IARS
1232	ENST00000463004.5	6.19E-05	0.003936972	ENSG00000131051	RBM39
1233	ENST00000403681.6	6.20E-05	0.003936972	ENSG00000149948	HMGA2
1234	ENST00000632823.1	6.19E-05	0.003936972	ENSG00000278563	MGAM2
1235	ENST00000411764.5	6.24E-05	0.003959029	ENSG00000034053	APBA2
1236	ENST00000534976.5	6.25E-05	0.00396328	ENSG00000089053	ANAPC5
1237	ENST00000461503.2	6.28E-05	0.003978284	ENSG00000163508	EOMES
1238	ENST00000310074.7	6.29E-05	0.003982962	ENSG00000173011	TADA2B
1239	ENST00000377707.3	6.33E-05	0.004000871	ENSG00000107338	SHB
1240	ENST00000341541.7	6.35E-05	0.004013863	ENSG00000151500	THYN1
1241	ENST00000511757.1	6.38E-05	0.004029269	ENSG00000114120	SLC25A36
1242	ENST00000242591.9	6.39E-05	0.004030039	ENSG00000122970	IFT81
1243	ENST00000230056.7	6.39E-05	0.004030039	ENSG00000112312	GMNN
1244	ENST00000554659.5	6.42E-05	0.004040342	ENSG00000100568	VTI1B
1245	ENST00000264926.6	6.44E-05	0.004049733	ENSG00000070950	RAD18
1246	ENST00000296255.7	6.44E-05	0.004049733	ENSG00000163902	RPN1
1247	ENST00000306846.7	6.45E-05	0.004052065	ENSG00000172239	PAIP1
1248	ENST00000394323.2	6.45E-05	0.004052065	ENSG00000213462	ERV3-1
1249	ENST00000263026.9	6.55E-05	0.004101704	ENSG00000103319	EEF2K
1250	ENST00000293349.10	6.55E-05	0.004101704	ENSG00000068137	PLEKHH3
1251	ENST00000303372.6	6.54E-05	0.004101704	ENSG00000168778	TCTN2
1252	ENST00000392321.3	6.56E-05	0.004107536	ENSG00000196458	ZNF605
1253	ENST00000461952.1	6.58E-05	0.004113743	ENSG00000122406	RPL5
1254	ENST00000515673.6	6.60E-05	0.004122634	ENSG00000170153	RNF150
1255	ENST00000372457.8	6.63E-05	0.004135374	ENSG00000159479	MED8
1256	ENST00000355693.4	6.63E-05	0.004135374	ENSG00000181924	COA4
1257	ENST00000306721.7	6.65E-05	0.00414333	ENSG00000144354	CDCA7
1258	ENST00000580036.5	6.65E-05	0.00414333	ENSG00000101670	LIPG
1259	ENST00000305921.7	6.68E-05	0.004150336	ENSG00000170836	PPM1D
1260	ENST00000366935.7	6.68E-05	0.004150336	ENSG00000092978	GPATCH2
1261	ENST00000308775.6	6.69E-05	0.004150336	ENSG00000173402	DAG1
1262	ENST00000335350.10	6.68E-05	0.004150336	ENSG00000107731	UNC5B
1263	ENST00000481819.5	6.69E-05	0.004151282	ENSG00000096746	HNRNPH3
1264	ENST00000532628.5	6.73E-05	0.004173784	ENSG00000231738	TSPAN19
1265	ENST00000461048.5	6.74E-05	0.004173784	ENSG00000168385	2-Sep
1266	ENST00000552671.5	6.76E-05	0.004185639	ENSG00000135476	ESPL1
1267	ENST00000559607.1	6.81E-05	0.004209907	ENSG00000166716	ZNF592
1268	ENST00000320954.10	6.81E-05	0.004209907	ENSG00000170275	CRTAP
1269	ENST00000404816.6	6.86E-05	0.004232867	ENSG00000049323	LTBP1
1270	ENST00000452510.6	6.91E-05	0.004260803	ENSG00000145833	DDX46
1271	ENST00000260643.6	6.92E-05	0.004262849	ENSG00000138073	PREB
1272	ENST00000613830.4	6.92E-05	0.004262849	ENSG00000091129	NRCAM
1273	ENST00000310455.3	6.96E-05	0.004281026	ENSG00000173281	PPP1R3B
1274	ENST00000525088.5	6.96E-05	0.004281026	ENSG00000175634	RPS6KB2
1275	ENST00000592993.1	6.97E-05	0.004283506	ENSG00000125503	PPP1R12C
1276	ENST00000382353.5	7.01E-05	0.004304174	ENSG00000102678	FGF9
1277	ENST00000415095.5	7.03E-05	0.004314566	ENSG00000186522	10-Sep
1278	ENST00000381334.9	7.05E-05	0.004315529	ENSG00000134851	TMEM165
1279	ENST00000608100.5	7.04E-05	0.004315529	ENSG00000128944	KNSTRN
1280	ENST00000637572.1	7.06E-05	0.004318934	ENSG00000173575	CHD2
1281	ENST00000427750.2	7.12E-05	0.0043569	ENSG00000149115	TNKS1BP1
1282	ENST00000377453.8	7.15E-05	0.004363628	ENSG00000102805	CLN5
1283	ENST00000592396.1	7.15E-05	0.004363628	ENSG00000160633	SAFB
1284	ENST00000543721.1	7.16E-05	0.004363628	ENSG00000048540	LMO3
1285	ENST00000254770.2	7.15E-05	0.004363628	ENSG00000132434	LANCL2
1286	ENST00000395405.5	7.19E-05	0.004382727	ENSG00000122952	ZWINT
1287	ENST00000393928.5	7.21E-05	0.004386321	ENSG00000141696	P3H4
1288	ENST00000304363.8	7.21E-05	0.004386649	ENSG00000110066	KMT5B
1289	ENST00000359653.4	7.24E-05	0.004395139	ENSG00000019995	ZRANB1
1290	ENST00000444376.6	7.24E-05	0.004395139	ENSG00000153187	HNRNPU
1291	ENST00000262428.4	7.24E-05	0.004395139	ENSG00000103187	COTL1
1292	ENST00000464087.6	7.26E-05	0.004400139	ENSG00000003756	RBM5
1293	ENST00000233741.8	7.29E-05	0.00441033	ENSG00000115392	FANCL
1294	ENST00000366672.4	7.30E-05	0.00441033	ENSG00000143641	GALNT2
1295	ENST00000397488.6	7.29E-05	0.00441033	ENSG00000007516	BAIAP3
1296	ENST00000480319.5	7.28E-05	0.00441033	ENSG00000183506	PI4KAP2
1297	ENST00000310806.8	7.32E-05	0.004420554	ENSG00000129534	MIS18BP1
1298	ENST00000480171.7	7.33E-05	0.004424335	ENSG00000144283	PKP4
1299	ENST00000555443.5	7.36E-05	0.004429581	ENSG00000165516	KLHDC2
1300	ENST00000267750.8	7.36E-05	0.004429581	ENSG00000128463	EMC4
1301	ENST00000551954.1	7.37E-05	0.004429581	ENSG00000092841	MYL6
1302	ENST00000625158.1	7.36E-05	0.004429581	ENSG00000279576	AP000769.1
1303	ENST00000354884.8	7.37E-05	0.004429581	ENSG00000165915	SLC39A13
1304	ENST00000478340.2	7.43E-05	0.004463665	ENSG00000198755	RPL10A
1305	ENST00000606389.5	7.44E-05	0.004463665	ENSG00000115977	AAK1
1306	ENST00000481869.1	7.44E-05	0.004465012	ENSG00000188290	HES4
1307	ENST00000626021.2	7.51E-05	0.004498634	ENSG00000112245	PTP4A1
1308	ENST00000370113.7	7.51E-05	0.004498634	ENSG00000162694	EXTL2
1309	ENST00000160740.7	7.52E-05	0.00449973	ENSG00000079432	CIC
1310	ENST00000505625.5	7.52E-05	0.00449973	ENSG00000015479	MATR3
1311	ENST00000399777.1	7.56E-05	0.00451568	ENSG00000099968	BCL2L13
1312	ENST00000394294.7	7.57E-05	0.004517531	ENSG00000108306	FBXL20
1313	ENST00000583931.5	7.61E-05	0.00453953	ENSG00000143401	ANP32E
1314	ENST00000256996.8	7.61E-05	0.00453953	ENSG00000134574	DDB2
1315	ENST00000382159.7	7.66E-05	0.004564676	ENSG00000176533	GNG7
1316	ENST00000619158.1	7.71E-05	0.004590584	ENSG00000140937	CDH11
1317	ENST00000351223.7	7.72E-05	0.004594039	ENSG00000132780	NASP
1318	ENST00000296953.6	7.76E-05	0.004601485	ENSG00000164463	CREBRF
1319	ENST00000536163.5	7.75E-05	0.004601485	ENSG00000257093	KIAA1147
1320	ENST00000262648.7	7.75E-05	0.004601485	ENSG00000011201	ANOS1
1321	ENST00000575464.5	7.75E-05	0.004601485	ENSG00000262599	KIAA1147
1322	ENST00000249806.10	7.79E-05	0.004615611	ENSG00000128973	CLN6
1323	ENST00000313899.11	7.80E-05	0.004618052	ENSG00000138668	HNRNPD
1324	ENST00000307885.4	7.81E-05	0.004618757	ENSG00000174233	ADCY6
1325	ENST00000428621.5	7.86E-05	0.004645143	ENSG00000162994	CLHC1
1326	ENST00000007414.7	7.86E-05	0.004646573	ENSG00000006025	OSBPL7
1327	ENST00000317897.4	7.88E-05	0.004654706	ENSG00000177383	MAGEF1
1328	ENST00000306773.4	7.91E-05	0.004665561	ENSG00000171246	NPTX1
1329	ENST00000407418.7	7.91E-05	0.004665561	ENSG00000183741	CBX6
1330	ENST00000454127.2	7.92E-05	0.004665705	ENSG00000169239	CA5B
1331	ENST00000371068.10	7.94E-05	0.004671711	ENSG00000096093	EFHC1
1332	ENST00000615792.1	7.94E-05	0.004671711	ENSG00000183049	CAMK1D
1333	ENST00000266037.9	7.96E-05	0.004676495	ENSG00000088538	DOCK3
1334	ENST00000321407.2	7.96E-05	0.004676936	ENSG00000179562	GCC1
1335	ENST00000290158.8	8.02E-05	0.004696247	ENSG00000108424	KPNB1
1336	ENST00000370025.8	8.01E-05	0.004696247	ENSG00000134186	PRPF38B
1337	ENST00000217026.4	8.01E-05	0.004696247	ENSG00000101057	MYBL2
1338	ENST00000494766.5	8.02E-05	0.004696247	ENSG00000130177	CDC16
1339	ENST00000476266.5	8.06E-05	0.004715631	ENSG00000105221	AKT2
1340	ENST00000432191.6	8.09E-05	0.004725367	ENSG00000134283	PPHLN1
1341	ENST00000369297.1	8.09E-05	0.004725367	ENSG00000135333	EPHA7
1342	ENST00000411486.6	8.10E-05	0.004726112	ENSG00000123485	HJURP
1343	ENST00000216951.6	8.13E-05	0.004740909	ENSG00000100983	GSS
1344	ENST00000357903.7	8.15E-05	0.004748136	ENSG00000142192	APP
1345	ENST00000240587.4	8.15E-05	0.004748136	ENSG00000121297	TSHZ3
1346	ENST00000592540.5	8.17E-05	0.004754701	ENSG00000161888	SPC24
1347	ENST00000465271.5	8.18E-05	0.004760232	ENSG00000143771	CNIH4
1348	ENST00000480479.5	8.20E-05	0.004765125	ENSG00000221978	CCNL2
1349	ENST00000510626.5	8.22E-05	0.004768215	ENSG00000197386	HTT
1350	ENST00000331327.4	8.22E-05	0.004768215	ENSG00000185129	PURA
1351	ENST00000578542.5	8.22E-05	0.004768215	ENSG00000068489	PRR11
1352	ENST00000300737.8	8.27E-05	0.004778435	ENSG00000167323	STIM1
1353	ENST00000378372.7	8.26E-05	0.004778435	ENSG00000187522	HSPA14
1354	ENST00000301904.3	8.26E-05	0.004778435	ENSG00000168077	SCARA3
1355	ENST00000554357.5	8.27E-05	0.004778435	ENSG00000100815	TRIP11
1356	ENST00000588875.2	8.28E-05	0.004778435	ENSG00000166562	SEC11C
1357	ENST00000524765.1	8.28E-05	0.004778435	ENSG00000109956	B3GAT1
1358	ENST00000495707.1	8.29E-05	0.004781733	ENSG00000196584	XRCC2
1359	ENST00000503802.5	8.31E-05	0.004781733	ENSG00000172869	DMXL1
1360	ENST00000596243.5	8.30E-05	0.004781733	ENSG00000104946	TBC1D17
1361	ENST00000476609.1	8.31E-05	0.004781733	ENSG00000071054	MAP4K4
1362	ENST00000526924.5	8.31E-05	0.004781733	ENSG00000161692	DBF4B
1363	ENST00000548622.1	8.32E-05	0.004783473	ENSG00000166598	HSP90B1
1364	ENST00000415092.5	8.34E-05	0.004786098	ENSG00000230456	DDR1
1365	ENST00000611155.4	8.34E-05	0.004786098	ENSG00000100219	XBP1
1366	ENST00000231524.13	8.37E-05	0.004801158	ENSG00000113595	TRIM23
1367	ENST00000381261.8	8.41E-05	0.004814451	ENSG00000197976	AKAP17A
1368	ENST00000345005.8	8.41E-05	0.004814451	ENSG00000179335	CLK3
1369	ENST00000299130.7	8.41E-05	0.004814451	ENSG00000107949	BCCIP
1370	ENST00000568871.1	8.42E-05	0.004815061	ENSG00000047346	FAM214A
1371	ENST00000240185.7	8.43E-05	0.004815532	ENSG00000120948	TARDBP
1372	ENST00000257209.8	8.46E-05	0.004824728	ENSG00000134775	FHOD3
1373	ENST00000369700.3	8.45E-05	0.004824728	ENSG00000146250	PRSS35
1374	ENST00000465604.1	8.47E-05	0.004829615	ENSG00000117632	STMN1
1375	ENST00000220514.7	8.48E-05	0.00483029	ENSG00000104147	OIP5
1376	ENST00000370542.1	8.48E-05	0.004830301	ENSG00000143013	LMO4
1377	ENST00000373132.3	8.50E-05	0.004838492	ENSG00000196182	STK40
1378	ENST00000551070.5	8.53E-05	0.004844965	ENSG00000111615	KRR1
1379	ENST00000280527.6	8.53E-05	0.004844965	ENSG00000150938	CRIM1
1380	ENST00000497970.5	8.54E-05	0.004847797	ENSG00000134253	TRIM45
1381	ENST00000310421.4	8.55E-05	0.004849769	ENSG00000175073	VCPIP1
1382	ENST00000334126.11	8.57E-05	0.004858596	ENSG00000168014	C2CD3
1383	ENST00000296733.5	8.59E-05	0.004865644	ENSG00000164287	CDC20B
1384	ENST00000374231.8	8.61E-05	0.004875381	ENSG00000137288	UQCC2
1385	ENST00000581066.2	8.67E-05	0.004897758	ENSG00000266472	MRPS21
1386	ENST00000269601.9	8.66E-05	0.004897758	ENSG00000141759	TXNL4A
1387	ENST00000306336.5	8.67E-05	0.004897758	ENSG00000168887	C2orf68
1388	ENST00000396057.5	8.71E-05	0.004915485	ENSG00000171956	FOXB1
1389	ENST00000261597.8	8.74E-05	0.004930214	ENSG00000080986	NDC80
1390	ENST00000399489.5	8.75E-05	0.004932694	ENSG00000189403	HMGB1
1391	ENST00000382496.9	8.77E-05	0.004940904	ENSG00000112902	SEMA5A
1392	ENST00000337970.7	8.78E-05	0.004940904	ENSG00000169813	HNRNPF
1393	ENST00000216639.7	8.79E-05	0.004945598	ENSG00000100749	VRK1
1394	ENST00000206020.7	8.80E-05	0.004947449	ENSG00000091640	SPAG7
1395	ENST00000556184.5	8.83E-05	0.004957758	ENSG00000100650	SRSF5
1396	ENST00000381886.8	8.85E-05	0.004965623	ENSG00000187555	USP7
1397	ENST00000327304.9	8.87E-05	0.004972809	ENSG00000107371	EXOSC3
1398	ENST00000246868.6	8.87E-05	0.004972809	ENSG00000126524	SBDS
1399	ENST00000382584.8	8.90E-05	0.00498512	ENSG00000163728	TTC14
1400	ENST00000222969.9	8.93E-05	0.00499319	ENSG00000106245	BUD31
1401	ENST00000470305.1	8.94E-05	0.00499319	ENSG00000187742	SECISBP2
1402	ENST00000396398.7	8.94E-05	0.00499319	ENSG00000198951	NAGA
1403	ENST00000268383.6	8.94E-05	0.00499319	ENSG00000140743	CDR2
1404	ENST00000249749.6	8.96E-05	0.004999859	ENSG00000128917	DLL4
1405	ENST00000343738.10	8.98E-05	0.005005614	ENSG00000250251	PKD1P6
1406	ENST00000579690.5	8.99E-05	0.005008046	ENSG00000083896	YTHDC1
1407	ENST00000627168.2	8.99E-05	0.005008046	ENSG00000275272	YTHDC1
1408	ENST00000510451.5	9.00E-05	0.00500833	ENSG00000178177	LCORL
1409	ENST00000476832.1	9.03E-05	0.005015943	ENSG00000119523	ALG2
1410	ENST00000320027.9	9.03E-05	0.005015943	ENSG00000120694	HSPH1
1411	ENST00000361217.8	9.04E-05	0.005018717	ENSG00000198837	DENND4B
1412	ENST00000264914.8	9.05E-05	0.00502319	ENSG00000113273	ARSB
1413	ENST00000590806.5	9.07E-05	0.005028367	ENSG00000079805	DNM2
1414	ENST00000438444.5	9.08E-05	0.00502998	ENSG00000106603	COA1
1415	ENST00000273432.8	9.10E-05	0.005040788	ENSG00000144893	MED12L
1416	ENST00000587391.5	9.13E-05	0.005048862	ENSG00000075702	WDR62
1417	ENST00000349556.4	9.13E-05	0.005049396	ENSG00000213066	FGFR1OP
1418	ENST00000164024.4	9.16E-05	0.005059508	ENSG00000008300	CELSR3
1419	ENST00000275532.7	9.17E-05	0.005065165	ENSG00000243335	KCTD7
1420	ENST00000493793.1	9.20E-05	0.005073232	ENSG00000085832	EPS15
1421	ENST00000315005.7	9.20E-05	0.005073232	ENSG00000161692	DBF4B
1422	ENST00000591991.1	9.23E-05	0.005079481	ENSG00000160633	SAFB
1423	ENST00000262554.6	9.24E-05	0.005079481	ENSG00000090054	SPTLC1
1424	ENST00000352618.8	9.23E-05	0.005079481	ENSG00000111247	RAD51AP1
1425	ENST00000234160.4	9.24E-05	0.005079481	ENSG00000115806	GORASP2
1426	ENST00000585374.5	9.26E-05	0.005083	ENSG00000196365	LONP1
1427	ENST00000270112.6	9.25E-05	0.005083	ENSG00000142149	HUNK
1428	ENST00000370096.7	9.32E-05	0.005113831	ENSG00000060718	COL11A1
1429	ENST00000361288.8	9.36E-05	0.005132208	ENSG00000064995	TAF11
1430	ENST00000610722.4	9.40E-05	0.00514767	ENSG00000125885	MCM8
1431	ENST00000334801.7	9.43E-05	0.00515825	ENSG00000186174	BCL9L
1432	ENST00000375535.3	9.44E-05	0.00515825	ENSG00000117122	MFAP2
1433	ENST00000615648.1	9.44E-05	0.00515825	ENSG00000261150	EPPK1
1434	ENST00000463088.5	9.45E-05	0.00515825	ENSG00000124596	OARD1
1435	ENST00000445819.5	9.45E-05	0.00515825	ENSG00000177943	MAMDC4
1436	ENST00000392524.6	9.48E-05	0.005171297	ENSG00000170144	HNRNPA3
1437	ENST00000370951.5	9.50E-05	0.005177915	ENSG00000116754	SRSF11
1438	ENST00000498707.5	9.50E-05	0.005177915	ENSG00000163638	ADAMTS9
1439	ENST00000262435.13	9.54E-05	0.0051891	ENSG00000108854	SMURF2
1440	ENST00000368192.8	9.54E-05	0.0051891	ENSG00000117036	ETV3
1441	ENST00000507407.1	9.55E-05	0.005194409	ENSG00000066230	SLC9A3
1442	ENST00000336798.11	9.60E-05	0.005212463	ENSG00000162512	SDC3
1443	ENST00000480029.5	9.60E-05	0.005212463	ENSG00000163714	U2SURP
1444	ENST00000296318.11	9.62E-05	0.005216818	ENSG00000144730	IL17RD
1445	ENST00000420613.6	9.65E-05	0.00522343	ENSG00000139620	KANSL2
1446	ENST00000380384.5	9.65E-05	0.00522343	ENSG00000137154	RPS6
1447	ENST00000491811.5	9.65E-05	0.00522343	ENSG00000116729	WLS
1448	ENST00000374232.7	9.65E-05	0.00522343	ENSG00000148158	SNX30
1449	ENST00000353533.9	9.67E-05	0.005226513	ENSG00000065559	MAP2K4
1450	ENST00000398881.3	9.71E-05	0.005245497	ENSG00000214736	TOMM6
1451	ENST00000367145.3	9.74E-05	0.005261428	ENSG00000158715	SLC45A3
1452	ENST00000367240.6	9.82E-05	0.00529788	ENSG00000143847	PPFIA4
1453	ENST00000407067.1	9.85E-05	0.005310621	ENSG00000110492	MDK
1454	ENST00000311330.3	9.86E-05	0.005313983	ENSG00000174807	CD248
1455	ENST00000503782.1	9.87E-05	0.005315998	ENSG00000213347	MXD3
1456	ENST00000346329.7	9.88E-05	0.005316312	ENSG00000085733	CTTN
1457	ENST00000631853.1	9.91E-05	0.005323637	ENSG00000282243	LRIG1
1458	ENST00000273261.7	9.91E-05	0.005323637	ENSG00000144749	LRIG1
1459	ENST00000614294.2	9.91E-05	0.005323637	ENSG00000275932	DUSP14
1460	ENST00000520687.1	9.94E-05	0.00533382	ENSG00000113140	SPARC
1461	ENST00000371733.7	9.95E-05	0.00533382	ENSG00000085832	EPS15
1462	ENST00000616279.4	9.97E-05	0.005341759	ENSG00000134318	ROCK2
1463	ENST00000377724.7	9.99E-05	0.005351298	ENSG00000122741	DCAF10
1464	ENST00000310454.10	0.000100585	0.005382728	ENSG00000115159	GPD2
1465	ENST00000381937.8	0.000101222	0.005404483	ENSG00000152620	NADK2
1466	ENST00000615034.1	0.000101143	0.005404483	ENSG00000277114	CNOT3
1467	ENST00000396926.7	0.000101081	0.005404483	ENSG00000070718	AP3M2
1468	ENST00000455834.5	0.000101267	0.005404483	ENSG00000114735	HEMK1
1469	ENST00000274311.2	0.000101497	0.00541308	ENSG00000152684	PELO
1470	ENST00000053867.7	0.000102348	0.005439397	ENSG00000030582	GRN
1471	ENST00000248929.13	0.000102407	0.005439397	ENSG00000100359	SGSM3
1472	ENST00000483571.5	0.000102386	0.005439397	ENSG00000126773	PCNX4
1473	ENST00000330062.7	0.000102274	0.005439397	ENSG00000182054	IDH2
1474	ENST00000305364.8	0.000102185	0.005439397	ENSG00000104228	TRIM35
1475	ENST00000471229.6	0.000102115	0.005439397	ENSG00000102401	ARMCX3
1476	ENST00000557026.5	0.000102808	0.005456949	ENSG00000119638	NEK9
1477	ENST00000366731.9	0.00010289	0.005457641	ENSG00000162910	MRPL55
1478	ENST00000265036.9	0.00010316	0.005468239	ENSG00000035499	DEPDC1B
1479	ENST00000262133.10	0.000103318	0.005472917	ENSG00000103479	RBL2
1480	ENST00000314393.5	0.000103923	0.00549382	ENSG00000178764	ZHX2
1481	ENST00000276390.6	0.00010381	0.00549382	ENSG00000147416	ATP6V1B2
1482	ENST00000286091.8	0.0001039	0.00549382	ENSG00000155660	PDIA4
1483	ENST00000498408.1	0.000104124	0.005497053	ENSG00000105856	HBP1
1484	ENST00000359221.7	0.000104094	0.005497053	ENSG00000109339	MAPK10
1485	ENST00000244221.8	0.000104346	0.005502377	ENSG00000124374	PAIP2B
1486	ENST00000331456.6	0.000104366	0.005502377	ENSG00000183763	TRAIP
1487	ENST00000274562.13	0.000104786	0.005519145	ENSG00000133706	LARS
1488	ENST00000474361.6	0.000104825	0.005519145	ENSG00000197976	AKAP17A
1489	ENST00000300933.8	0.000105073	0.005523235	ENSG00000167460	TPM4
1490	ENST00000279907.11	0.000105006	0.005523235	ENSG00000111647	UHRF1BP1L
1491	ENST00000240093.7	0.000105114	0.005523235	ENSG00000104290	FZD3
1492	ENST00000484213.1	0.000105237	0.00552601	ENSG00000117528	ABCD3
1493	ENST00000614588.1	0.000105667	0.005544876	ENSG00000205903	ZNF316
1494	ENST00000504830.5	0.000105846	0.005549348	ENSG00000151388	ADAMTS12
1495	ENST00000279873.11	0.000105924	0.005549348	ENSG00000150347	ARID5B
1496	ENST00000602849.1	0.000105965	0.005549348	ENSG00000162775	RBM15
1497	ENST00000509479.6	0.000106079	0.005550119	ENSG00000196782	MAML3
1498	ENST00000311765.3	0.000106121	0.005550119	ENSG00000172840	PDP2
1499	ENST00000233893.9	0.000106257	0.005551133	ENSG00000115541	HSPE1
1500	ENST00000268616.8	0.000106282	0.005551133	ENSG00000140948	ZCCHC14
1501	ENST00000529604.1	0.000106537	0.005560721	ENSG00000134569	LRP4
1502	ENST00000592727.3	0.000106656	0.005563221	ENSG00000104904	OAZ1
1503	ENST00000414849.6	0.000106825	0.005568352	ENSG00000137804	NUSAP1
1504	ENST00000466917.1	0.000106917	0.005569427	ENSG00000135250	SRPK2
1505	ENST00000275053.8	0.000107079	0.005574181	ENSG00000146263	MMS22L
1506	ENST00000476371.1	0.000107231	0.005578354	ENSG00000120333	MRPS14
1507	ENST00000367001.4	0.000107464	0.005586747	ENSG00000170385	SLC30A1
1508	ENST00000373425.7	0.000107737	0.005597251	ENSG00000136859	ANGPTL2
1509	ENST00000343638.9	0.000107936	0.005600169	ENSG00000108312	UBTF
1510	ENST00000394861.2	0.000107928	0.005600169	ENSG00000171150	SOCS5
1511	ENST00000356166.10	0.000108022	0.005600898	ENSG00000156860	FBRS
1512	ENST00000332118.10	0.000108413	0.005617484	ENSG00000182934	SRPRA
1513	ENST00000550078.1	0.000108625	0.005624741	ENSG00000257315	ZBED6
1514	ENST00000428128.1	0.000108781	0.005625359	ENSG00000187627	RGPD1
1515	ENST00000607599.5	0.000108737	0.005625359	ENSG00000258289	CHURC1
1516	ENST00000483350.1	0.000108875	0.005626548	ENSG00000004534	RBM6
1517	ENST00000370986.8	0.000110096	0.00568587	ENSG00000116717	GADD45A
1518	ENST00000313655.4	0.000110219	0.005688486	ENSG00000136982	DSCC1
1519	ENST00000489294.1	0.000110319	0.005689865	ENSG00000152332	UHMK1
1520	ENST00000448108.6	0.000110418	0.00569124	ENSG00000166012	TAF1D
1521	ENST00000488010.5	0.000110752	0.005704692	ENSG00000144747	TMF1
1522	ENST00000356341.7	0.000111546	0.005741817	ENSG00000149269	PAK1
1523	ENST00000443108.5	0.000111679	0.005744917	ENSG00000228409	CCT6P1
1524	ENST00000285930.8	0.000112501	0.005783381	ENSG00000085662	AKR1B1
1525	ENST00000296218.7	0.000113099	0.005793019	ENSG00000163879	DNALI1
1526	ENST00000433877.6	0.000112855	0.005793019	ENSG00000111011	RSRC2
1527	ENST00000561648.5	0.000113132	0.005793019	ENSG00000102935	ZNF423
1528	ENST00000298532.2	0.000113044	0.005793019	ENSG00000165684	SNAPC4
1529	ENST00000361060.5	0.000113024	0.005793019	ENSG00000198380	GFPT1
1530	ENST00000277225.9	0.000112943	0.005793019	ENSG00000148143	ZNF462
1531	ENST00000332687.10	0.00011346	0.00580603	ENSG00000131263	RLIM
1532	ENST00000452853.6	0.000113838	0.005821566	ENSG00000070087	PFN2
1533	ENST00000379731.4	0.000114182	0.005835364	ENSG00000086062	B4GALT1
1534	ENST00000341567.8	0.000114352	0.005840243	ENSG00000106609	TMEM248
1535	ENST00000490303.5	0.000114641	0.005851161	ENSG00000058063	ATP11B
1536	ENST00000366862.9	0.000114834	0.005857198	ENSG00000143756	FBXO28
1537	ENST00000510191.5	0.000115465	0.005885572	ENSG00000133706	LARS
1538	ENST00000381237.5	0.000115638	0.005887971	ENSG00000104635	SLC39A14
1539	ENST00000320330.7	0.000115663	0.005887971	ENSG00000280789	PAGR1
1540	ENST00000477128.5	0.000115802	0.005891239	ENSG00000108651	UTP6
1541	ENST00000382713.9	0.000115989	0.005896932	ENSG00000206052	DOK6
1542	ENST00000295633.7	0.000116463	0.005913358	ENSG00000163430	FSTL1
1543	ENST00000333279.2	0.000116452	0.005913358	ENSG00000183831	ANKRD45
1544	ENST00000549258.5	0.000116768	0.005921361	ENSG00000134294	SLC38A2
1545	ENST00000550136.1	0.000116772	0.005921361	ENSG00000185920	PTCH1
1546	ENST00000331224.10	0.000116951	0.005926613	ENSG00000185559	DLK1
1547	ENST00000367075.3	0.000117273	0.005939094	ENSG00000092820	EZR
1548	ENST00000581487.1	0.000117368	0.005940036	ENSG00000183723	CMTM4
1549	ENST00000262177.8	0.000117593	0.00594757	ENSG00000105993	DNAJB6
1550	ENST00000357949.4	0.00011787	0.005957734	ENSG00000197019	SERTAD1
1551	ENST00000485668.5	0.000118292	0.005975256	ENSG00000222009	BTBD19
1552	ENST00000393083.2	0.000118545	0.005982357	ENSG00000105894	PTN
1553	ENST00000299767.9	0.000118586	0.005982357	ENSG00000166598	HSP90B1
1554	ENST00000496121.5	0.000119326	0.005984994	ENSG00000156261	CCT8
1555	ENST00000257527.8	0.000118966	0.005984994	ENSG00000135074	ADAM19
1556	ENST00000557529.1	0.00011901	0.005984994	ENSG00000182199	SHMT2
1557	ENST00000421200.1	0.000119191	0.005984994	ENSG00000167615	LENG8
1558	ENST00000361677.5	0.000119123	0.005984994	ENSG00000198863	RUNDC1
1559	ENST00000216106.5	0.000119088	0.005984994	ENSG00000100281	HMGXB4
1560	ENST00000283632.4	0.000119217	0.005984994	ENSG00000153561	RMND5A
1561	ENST00000611220.1	0.000119191	0.005984994	ENSG00000276681	LENG8
1562	ENST00000594199.2	0.000119276	0.005984994	ENSG00000269743	SLC25A53
1563	ENST00000590485.1	0.000119467	0.00598825	ENSG00000160633	SAFB
1564	ENST00000375078.3	0.000119998	0.006006231	ENSG00000162545	CAMK2N1
1565	ENST00000301391.7	0.000120075	0.006006231	ENSG00000167740	CYB5D2
1566	ENST00000528173.5	0.000119974	0.006006231	ENSG00000149091	DGKZ
1567	ENST00000243389.7	0.000120132	0.006006231	ENSG00000123643	SLC36A1
1568	ENST00000286657.9	0.000120479	0.006019749	ENSG00000156140	ADAMTS3
1569	ENST00000557094.5	0.000121259	0.00605484	ENSG00000140105	WARS
1570	ENST00000521840.1	0.000121415	0.006055065	ENSG00000156170	NDUFAF6
1571	ENST00000495270.1	0.000121418	0.006055065	ENSG00000136908	DPM2
1572	ENST00000444051.1	0.000121607	0.006060605	ENSG00000204623	ZNRD1ASP
1573	ENST00000473835.6	0.000121766	0.006060836	ENSG00000163714	U2SURP
1574	ENST00000278756.7	0.000121699	0.006060836	ENSG00000084234	APLP2
1575	ENST00000637033.1	0.000121981	0.006066236	ENSG00000175344	CHRNA7
1576	ENST00000368986.8	0.000122029	0.006066236	ENSG00000112333	NR2E1
1577	ENST00000369893.9	0.000122173	0.00606952	ENSG00000156398	SFXN2
1578	ENST00000368235.7	0.000122514	0.006082616	ENSG00000163382	NAXE
1579	ENST00000463260.5	0.000123069	0.006106308	ENSG00000221978	CCNL2
1580	ENST00000552740.5	0.000123191	0.006108473	ENSG00000175197	DDIT3
1581	ENST00000368409.7	0.000123449	0.006117042	ENSG00000243364	EFNA4
1582	ENST00000332499.3	0.00012352	0.006117042	ENSG00000186834	HEXIM1
1583	ENST00000294623.8	0.000123609	0.006117596	ENSG00000162613	FUBP1
1584	ENST00000395969.6	0.000123798	0.006123064	ENSG00000006715	VPS41
1585	ENST00000316626.5	0.000124034	0.006123162	ENSG00000082701	GSK3B
1586	ENST00000329630.9	0.000123955	0.006123162	ENSG00000196456	ZNF775
1587	ENST00000446373.1	0.000123985	0.006123162	ENSG00000170629	DPY19L2P2
1588	ENST00000573536.1	0.000124289	0.006131885	ENSG00000074755	ZZEF1
1589	ENST00000473021.1	0.000124625	0.00614457	ENSG00000185624	P4HB
1590	ENST00000290231.10	0.000125129	0.006165563	ENSG00000124160	NCOA5
1591	ENST00000264596.3	0.000125273	0.006168775	ENSG00000109674	NEIL3
1592	ENST00000266735.9	0.000125445	0.006169503	ENSG00000139343	SNRPF
1593	ENST00000409204.4	0.000125374	0.006169503	ENSG00000280165	PCDH20
1594	ENST00000515803.5	0.000125913	0.006188608	ENSG00000145555	MYO10
1595	ENST00000450169.6	0.000126058	0.006191837	ENSG00000106355	LSM5
1596	ENST00000439977.6	0.000126499	0.006209639	ENSG00000051108	HERPUD1
1597	ENST00000611270.1	0.000126678	0.006214519	ENSG00000033800	PIAS1
1598	ENST00000246841.3	0.000127096	0.006227227	ENSG00000126500	FLRT1
1599	ENST00000296273.6	0.000127076	0.006227227	ENSG00000163918	RFC4
1600	ENST00000520140.5	0.000127589	0.006246028	ENSG00000155975	VPS37A
1601	ENST00000383807.5	0.000127639	0.006246028	ENSG00000144554	FANCD2
1602	ENST00000409356.1	0.000127787	0.006249369	ENSG00000144485	HES6
1603	ENST00000251691.4	0.000127993	0.00625554	ENSG00000112379	ARFGEF3
1604	ENST00000525606.5	0.000128233	0.006263366	ENSG00000110321	EIF4G2
1605	ENST00000037869.7	0.000129325	0.006312743	ENSG00000035141	FAM136A
1606	ENST00000479872.5	0.000129986	0.006341061	ENSG00000143179	UCK2
1607	ENST00000247843.6	0.000130143	0.00634478	ENSG00000127337	YEATS4
1608	ENST00000343526.8	0.000130483	0.006357393	ENSG00000122779	TRIM24
1609	ENST00000260118.6	0.000130885	0.006373028	ENSG00000137563	GGH
1610	ENST00000376634.8	0.000130993	0.006374315	ENSG00000197969	VPS13A
1611	ENST00000526143.2	0.000131215	0.006381136	ENSG00000186174	BCL9L
1612	ENST00000234590.8	0.000131452	0.006388691	ENSG00000074800	ENO1
1613	ENST00000546299.1	0.000131891	0.006402123	ENSG00000170456	DENND5B
1614	ENST00000377560.9	0.000131886	0.006402123	ENSG00000173064	HECTD4
1615	ENST00000264039.6	0.00013264	0.006430506	ENSG00000063660	GPC1
1616	ENST00000398665.7	0.000132572	0.006430506	ENSG00000104885	DOT1L
1617	ENST00000484882.1	0.00013276	0.006432332	ENSG00000157851	DPYSL5
1618	ENST00000344063.6	0.000132928	0.006432528	ENSG00000108107	RPL28
1619	ENST00000300584.7	0.000132854	0.006432528	ENSG00000167202	TBC1D2B
1620	ENST00000409262.7	0.000133372	0.006450019	ENSG00000187605	TET3
1621	ENST00000252816.10	0.000133815	0.006467469	ENSG00000130520	LSM4
1622	ENST00000392348.6	0.000134191	0.006477608	ENSG00000029363	BCLAF1
1623	ENST00000304987.3	0.000134176	0.006477608	ENSG00000170145	SIK2
1624	ENST00000492048.5	0.000134437	0.006485487	ENSG00000101680	LAMA1
1625	ENST00000337120.9	0.00013453	0.006485994	ENSG00000178188	SH2B1
1626	ENST00000466318.5	0.000135821	0.006536283	ENSG00000264619	MSH5-SAPCD1
1627	ENST00000495073.5	0.000135821	0.006536283	ENSG00000255419	MSH5-SAPCD1
1628	ENST00000496558.5	0.000135823	0.006536283	ENSG00000066032	CTNNA2
1629	ENST00000377403.6	0.000136074	0.006536304	ENSG00000049239	H6PD
1630	ENST00000519943.1	0.000136047	0.006536304	ENSG00000169045	HNRNPH1
1631	ENST00000581312.5	0.000136001	0.006536304	ENSG00000264522	OTUD7B
1632	ENST00000550023.5	0.00013617	0.006536922	ENSG00000111615	KRR1
1633	ENST00000495883.1	0.000136573	0.006549521	ENSG00000132639	SNAP25
1634	ENST00000396210.7	0.0001366	0.006549521	ENSG00000008394	MGST1
1635	ENST00000403825.7	0.0001367	0.006550293	ENSG00000006652	IFRD1
1636	ENST00000264741.9	0.000137448	0.006582133	ENSG00000144668	ITGA9
1637	ENST00000357578.7	0.000137757	0.006592918	ENSG00000112294	ALDH5A1
1638	ENST00000540112.1	0.00013816	0.006608134	ENSG00000006118	TMEM132A
1639	ENST00000303921.2	0.000138527	0.006621666	ENSG00000170775	GPR37
1640	ENST00000336755.9	0.000138761	0.006623242	ENSG00000147905	ZCCHC7
1641	ENST00000227378.7	0.000138662	0.006623242	ENSG00000109971	HSPA8
1642	ENST00000368926.5	0.000138907	0.006623242	ENSG00000143443	C1orf56
1643	ENST00000325167.9	0.000138916	0.006623242	ENSG00000176108	CHMP6
1644	ENST00000532297.5	0.000138983	0.006623242	ENSG00000162231	NXF1
1645	ENST00000569524.5	0.000139297	0.006630605	ENSG00000178761	FAM219B
1646	ENST00000270538.7	0.000139307	0.006630605	ENSG00000104980	TIMM44
1647	ENST00000337943.9	0.000139503	0.006632604	ENSG00000183010	PYCR1
1648	ENST00000372715.6	0.000139518	0.006632604	ENSG00000119333	WDR34
1649	ENST00000591101.5	0.000139745	0.006639371	ENSG00000130254	SAFB2
1650	ENST00000402966.1	0.000140252	0.006651774	ENSG00000184208	C22orf46
1651	ENST00000462994.1	0.00014023	0.006651774	ENSG00000198408	MGEA5
1652	ENST00000367498.7	0.000140261	0.006651774	ENSG00000116679	IVNS1ABP
1653	ENST00000258149.9	0.00014072	0.006669335	ENSG00000135679	MDM2
1654	ENST00000409028.8	0.000140801	0.006669335	ENSG00000071082	RPL31
1655	ENST00000358344.7	0.000140889	0.006669463	ENSG00000197451	HNRNPAB
1656	ENST00000559450.5	0.000141229	0.006681517	ENSG00000090661	CERS4
1657	ENST00000237264.8	0.000142444	0.006734929	ENSG00000028839	TBPL1
1658	ENST00000504466.1	0.000142935	0.006754082	ENSG00000113161	HMGCR
1659	ENST00000320389.11	0.000143662	0.006769249	ENSG00000130294	KIF1A
1660	ENST00000570462.5	0.000143688	0.006769249	ENSG00000262860	LSM14A
1661	ENST00000291592.5	0.00014363	0.006769249	ENSG00000160233	LRRC3
1662	ENST00000466182.5	0.000143462	0.006769249	ENSG00000105875	WDR91
1663	ENST00000599939.1	0.000143659	0.006769249	ENSG00000104980	TIMM44
1664	ENST00000439578.5	0.000144038	0.006781636	ENSG00000152700	SAR1B
1665	ENST00000359847.3	0.000144417	0.00679542	ENSG00000148053	NTRK2
1666	ENST00000369239.9	0.000144551	0.006797609	ENSG00000132424	PNISR
1667	ENST00000485542.5	0.000145182	0.00682322	ENSG00000116489	CAPZA1
1668	ENST00000338333.4	0.000145394	0.006829089	ENSG00000188573	FBLL1
1669	ENST00000037243.6	0.000146012	0.006853988	ENSG00000034713	GABARAPL2
1670	ENST00000487045.6	0.000146328	0.006859265	ENSG00000089280	FUS
1671	ENST00000209873.8	0.000146303	0.006859265	ENSG00000094914	AAAS
1672	ENST00000299162.9	0.000146387	0.006859265	ENSG00000139445	FOXN4
1673	ENST00000282849.9	0.000146711	0.006866227	ENSG00000140873	ADAMTS18
1674	ENST00000272091.7	0.000146657	0.006866227	ENSG00000143751	SDE2
1675	ENST00000373696.7	0.000146948	0.006873163	ENSG00000147174	ACRC
1676	ENST00000424296.6	0.000147035	0.006873163	ENSG00000155085	AK9
1677	ENST00000391440.2	0.000147258	0.006873958	ENSG00000212747	FAM127C
1678	ENST00000581302.5	0.000147223	0.006873958	ENSG00000101782	RIOK3
1679	ENST00000497519.1	0.000147324	0.006873958	ENSG00000122406	RPL5
1680	ENST00000533538.5	0.000147403	0.006873958	ENSG00000141279	NPEPPS
1681	ENST00000250405.9	0.000147759	0.006886505	ENSG00000129473	BCL2L2
1682	ENST00000369763.4	0.000147905	0.006889181	ENSG00000121931	LRIF1
1683	ENST00000488213.5	0.000148115	0.006894067	ENSG00000163882	POLR2H
1684	ENST00000465539.1	0.000148186	0.006894067	ENSG00000257267	ZNF271P
1685	ENST00000372853.8	0.000148362	0.006898153	ENSG00000167118	URM1
1686	ENST00000340879.8	0.000149169	0.00692581	ENSG00000068745	IP6K2
1687	ENST00000372236.8	0.000149275	0.00692581	ENSG00000170734	POLH
1688	ENST00000369940.6	0.00014931	0.00692581	ENSG00000146243	IRAK1BP1
1689	ENST00000428304.6	0.000149087	0.00692581	ENSG00000100439	ABHD4
1690	ENST00000405675.7	0.000150101	0.006958371	ENSG00000213923	CSNK1E
1691	ENST00000291495.5	0.000150268	0.006961982	ENSG00000160161	CILP2
1692	ENST00000368277.3	0.000150989	0.006981652	ENSG00000160783	PMF1
1693	ENST00000609519.5	0.000151227	0.006981652	ENSG00000011243	AKAP8L
1694	ENST00000295760.11	0.000151098	0.006981652	ENSG00000163520	FBLN2
1695	ENST00000519807.5	0.000150813	0.006981652	ENSG00000008988	RPS20
1696	ENST00000394023.7	0.000151149	0.006981652	ENSG00000139613	SMARCC2
1697	ENST00000409939.7	0.000151186	0.006981652	ENSG00000169221	TBC1D10B
1698	ENST00000460297.1	0.000151542	0.006992101	ENSG00000103202	NME4
1699	ENST00000266744.3	0.000151879	0.007003529	ENSG00000139352	ASCL1
1700	ENST00000564138.5	0.000152053	0.007007389	ENSG00000197943	PLCG2
1701	ENST00000471217.5	0.000152241	0.00701194	ENSG00000095564	BTAF1
1702	ENST00000273317.4	0.000152577	0.007023293	ENSG00000144791	LIMD1
1703	ENST00000271332.3	0.000153871	0.007074553	ENSG00000143126	CELSR2
1704	ENST00000490826.1	0.000153796	0.007074553	ENSG00000134684	YARS
1705	ENST00000491735.1	0.000154157	0.007083559	ENSG00000067064	IDI1
1706	ENST00000360718.5	0.000154289	0.007085455	ENSG00000161011	SQSTM1
1707	ENST00000544599.5	0.000154407	0.007086698	ENSG00000155957	TMBIM4
1708	ENST00000633531.1	0.00015494	0.007107026	ENSG00000105854	PON2
1709	ENST00000359035.4	0.000155038	0.007107358	ENSG00000198546	ZNF511
1710	ENST00000539683.2	0.000155263	0.007113484	ENSG00000103510	KAT8
1711	ENST00000219281.7	0.000156007	0.007143411	ENSG00000103005	USB1
1712	ENST00000622427.4	0.000156227	0.007149323	ENSG00000151150	ANK3
1713	ENST00000218348.7	0.000156416	0.007153764	ENSG00000102226	USP11
1714	ENST00000419781.5	0.00015712	0.007176782	ENSG00000082258	CCNT2
1715	ENST00000335154.9	0.000157019	0.007176782	ENSG00000161791	FMNL3
1716	ENST00000539644.5	0.000157194	0.007176782	ENSG00000179195	ZNF664
1717	ENST00000437952.1	0.000157394	0.007177565	ENSG00000120686	UFM1
1718	ENST00000242480.3	0.000157333	0.007177565	ENSG00000122877	EGR2
1719	ENST00000375068.5	0.000157715	0.007187991	ENSG00000102316	MAGED2
1720	ENST00000301905.8	0.000157856	0.00719024	ENSG00000168078	PBK
1721	ENST00000340866.9	0.00015849	0.007211447	ENSG00000116791	CRYZ
1722	ENST00000530731.5	0.000158598	0.007211447	ENSG00000154144	TBRG1
1723	ENST00000273375.7	0.000158549	0.007211447	ENSG00000144840	RABL3
1724	ENST00000421249.2	0.000159208	0.007234987	ENSG00000164944	KIAA1429
1725	ENST00000449193.6	0.000159422	0.00723807	ENSG00000180592	SKIDA1
1726	ENST00000435224.2	0.00015946	0.00723807	ENSG00000166016	ABTB2
1727	ENST00000328965.8	0.000159589	0.007239731	ENSG00000184232	OAF
1728	ENST00000288828.8	0.000159809	0.007245484	ENSG00000157954	WIPI2
1729	ENST00000264867.6	0.000160626	0.007275694	ENSG00000109819	PPARGC1A
1730	ENST00000548796.1	0.000160661	0.007275694	ENSG00000179364	PACS2
1731	ENST00000262158.6	0.000161165	0.007291638	ENSG00000101665	SMAD7
1732	ENST00000261296.6	0.000161248	0.007291638	ENSG00000088451	TGDS
1733	ENST00000347471.8	0.000161292	0.007291638	ENSG00000139613	SMARCC2
1734	ENST00000609199.1	0.000161717	0.007306632	ENSG00000011007	TCEB3
1735	ENST00000566063.1	0.000162461	0.007336012	ENSG00000166233	ARIH1
1736	ENST00000269214.9	0.000163633	0.007384693	ENSG00000141446	ESCO1
1737	ENST00000458659.2	0.000163958	0.007395119	ENSG00000102804	TSC22D1
1738	ENST00000332859.10	0.00016495	0.00743558	ENSG00000184900	SUMO3
1739	ENST00000625177.3	0.000165276	0.007439817	ENSG00000124226	RNF114
1740	ENST00000352967.8	0.000165219	0.007439817	ENSG00000143498	TAF1A
1741	ENST00000452075.7	0.000165329	0.007439817	ENSG00000234420	ZNF37BP
1742	ENST00000528420.5	0.000165653	0.007450092	ENSG00000198382	UVRAG
1743	ENST00000554218.1	0.000166138	0.007467628	ENSG00000139971	C14orf37
1744	ENST00000337090.7	0.000166253	0.007468498	ENSG00000182923	CEP63
1745	ENST00000351193.6	0.000166663	0.007482644	ENSG00000169251	NMD3
1746	ENST00000164133.6	0.000166794	0.00748424	ENSG00000068971	PPP2R5B
1747	ENST00000485534.5	0.00016766	0.007510208	ENSG00000215425	DDX39B
1748	ENST00000461254.5	0.00016766	0.007510208	ENSG00000230624	DDX39B
1749	ENST00000494457.5	0.00016766	0.007510208	ENSG00000229496	DDX39B
1750	ENST00000449141.2	0.000168049	0.007523307	ENSG00000125868	DSTN
1751	ENST00000424306.5	0.000168229	0.007527074	ENSG00000234062	RP11-308D16.2
1752	ENST00000340438.5	0.000168397	0.007528662	ENSG00000189369	GSPT2
1753	ENST00000302759.10	0.000168553	0.007528662	ENSG00000169679	BUB1
1754	ENST00000534079.5	0.000168543	0.007528662	ENSG00000166012	TAF1D
1755	ENST00000531178.1	0.000169079	0.007543579	ENSG00000167797	CDK2AP2
1756	ENST00000581396.5	0.000169071	0.007543579	ENSG00000175662	TOM1L2
1757	ENST00000373606.7	0.000169688	0.00755783	ENSG00000101363	MANBAL
1758	ENST00000368679.8	0.000169646	0.00755783	ENSG00000148848	ADAM12
1759	ENST00000504435.1	0.000169622	0.00755783	ENSG00000178950	GAK
1760	ENST00000268154.8	0.000169811	0.00755901	ENSG00000140548	ZNF710
1761	ENST00000548783.1	0.000171448	0.007620991	ENSG00000175183	CSRP2
1762	ENST00000262990.8	0.000171495	0.007620991	ENSG00000109445	ZNF330
1763	ENST00000343307.4	0.000171322	0.007620991	ENSG00000187676	B3GLCT
1764	ENST00000349780.8	0.000171626	0.00762246	ENSG00000136861	CDK5RAP2
1765	ENST00000582436.5	0.000171929	0.007631603	ENSG00000109118	PHF12
1766	ENST00000469862.1	0.000172092	0.007634514	ENSG00000117724	CENPF
1767	ENST00000375759.7	0.000172293	0.007639117	ENSG00000065526	SPEN
1768	ENST00000216714.7	0.000173647	0.007694763	ENSG00000100823	APEX1
1769	ENST00000319285.4	0.000173926	0.00770277	ENSG00000179958	DCTPP1
1770	ENST00000533387.5	0.000174062	0.00770444	ENSG00000151498	ACAD8
1771	ENST00000619199.4	0.000174391	0.00771029	ENSG00000133657	ATP13A3
1772	ENST00000470161.6	0.000174316	0.00771029	ENSG00000185619	PCGF3
1773	ENST00000402297.5	0.000174641	0.007712658	ENSG00000218739	CEBPZOS
1774	ENST00000257934.8	0.000174548	0.007712658	ENSG00000135476	ESPL1
1775	ENST00000559891.1	0.0001749	0.00771976	ENSG00000184277	TM2D3
1776	ENST00000621533.4	0.000175354	0.007731052	ENSG00000146457	WTAP
1777	ENST00000414212.5	0.000175279	0.007731052	ENSG00000118965	WDR35
1778	ENST00000464757.1	0.000175934	0.007739203	ENSG00000203667	COX20
1779	ENST00000225388.8	0.000175845	0.007739203	ENSG00000108256	NUFIP2
1780	ENST00000346786.2	0.000175749	0.007739203	ENSG00000101335	MYL9
1781	ENST00000477892.5	0.000175919	0.007739203	ENSG00000114023	FAM162A
1782	ENST00000483273.2	0.000176294	0.007750716	ENSG00000233954	UQCRHL
1783	ENST00000344529.4	0.000176629	0.007761089	ENSG00000135845	PIGC
1784	ENST00000336349.5	0.00017751	0.007795395	ENSG00000179119	SPTY2D1
1785	ENST00000302475.8	0.000178259	0.007823905	ENSG00000171444	MCC
1786	ENST00000356998.7	0.000178624	0.00783557	ENSG00000100060	MFNG
1787	ENST00000570917.5	0.00017899	0.00784284	ENSG00000153066	TXNDC11
1788	ENST00000356309.7	0.000178921	0.00784284	ENSG00000146918	NCAPG2
1789	ENST00000270233.10	0.000179221	0.007848545	ENSG00000187244	BCAM
1790	ENST00000438378.2	0.000179822	0.007870479	ENSG00000152117	AC093838.4
1791	ENST00000485800.6	0.000180002	0.007872963	ENSG00000075826	SEC31B
1792	ENST00000357258.8	0.00018008	0.007872963	ENSG00000181722	ZBTB20
1793	ENST00000285697.8	0.000180435	0.007884114	ENSG00000155330	C16orf87
1794	ENST00000415912.6	0.000180666	0.007885689	ENSG00000117298	ECE1
1795	ENST00000381638.6	0.000180673	0.007885689	ENSG00000074755	ZZEF1
1796	ENST00000487297.5	0.000181035	0.007892722	ENSG00000185917	SETD4
1797	ENST00000313408.11	0.000180988	0.007892722	ENSG00000115286	NDUFS7
1798	ENST00000379485.1	0.000181477	0.007904577	ENSG00000165572	KBTBD6
1799	ENST00000527082.5	0.000181509	0.007904577	ENSG00000151498	ACAD8
1800	ENST00000460357.1	0.000181862	0.007915522	ENSG00000204852	TCTN1
1801	ENST00000606613.1	0.000182467	0.007933062	ENSG00000233822	HIST1H2BN
1802	ENST00000355327.7	0.000182437	0.007933062	ENSG00000187720	THSD4
1803	ENST00000470430.1	0.000182796	0.007941782	ENSG00000187522	HSPA14
1804	ENST00000561095.1	0.00018287	0.007941782	ENSG00000140534	TICRR
1805	ENST00000368657.7	0.000183014	0.007942694	ENSG00000074935	TUBE1
1806	ENST00000263960.6	0.000183094	0.007942694	ENSG00000115520	COQ10B
1807	ENST00000439504.6	0.00018401	0.00797361	ENSG00000168010	ATG16L2
1808	ENST00000433688.2	0.000183986	0.00797361	ENSG00000188070	C11orf95
1809	ENST00000352151.9	0.00018412	0.007973959	ENSG00000161791	FMNL3
1810	ENST00000367696.6	0.000184359	0.007979911	ENSG00000135870	RC3H1
1811	ENST00000496060.1	0.000184861	0.007994534	ENSG00000144026	ZNF514
1812	ENST00000555228.5	0.000184901	0.007994534	ENSG00000140043	PTGR2
1813	ENST00000495049.5	0.000185478	0.008012333	ENSG00000156976	EIF4A2
1814	ENST00000536839.1	0.00018562	0.008012333	ENSG00000077458	FAM76B
1815	ENST00000465139.6	0.000185546	0.008012333	ENSG00000140350	ANP32A
1816	ENST00000321301.6	0.000186116	0.008024912	ENSG00000175768	TOMM5
1817	ENST00000479475.1	0.00018609	0.008024912	ENSG00000177943	MAMDC4
1818	ENST00000399262.6	0.00018645	0.008034896	ENSG00000171988	JMJD1C
1819	ENST00000311417.6	0.000186931	0.008046321	ENSG00000172667	ZMAT3
1820	ENST00000303305.10	0.000186842	0.008046321	ENSG00000170515	PA2G4
1821	ENST00000602348.5	0.000187023	0.008046321	ENSG00000106133	NSUN5P2
1822	ENST00000534854.6	0.000187419	0.00805007	ENSG00000015153	YAF2
1823	ENST00000420536.1	0.000187361	0.00805007	ENSG00000100316	RPL3
1824	ENST00000423698.6	0.000187271	0.00805007	ENSG00000012061	ERCC1
1825	ENST00000269141.7	0.000187701	0.008057758	ENSG00000170558	CDH2
1826	ENST00000490716.5	0.000187886	0.008061308	ENSG00000102710	SUPT20H
1827	ENST00000411772.5	0.000189362	0.008106858	ENSG00000067369	TP53BP1
1828	ENST00000395595.7	0.000189319	0.008106858	ENSG00000079974	RABL2B
1829	ENST00000559133.5	0.00018922	0.008106858	ENSG00000166147	FBN1
1830	ENST00000261917.3	0.000189257	0.008106858	ENSG00000138622	HCN4
1831	ENST00000368644.5	0.000189697	0.008112324	ENSG00000108010	GLRX3
1832	ENST00000514900.5	0.000189631	0.008112324	ENSG00000172771	EFCAB12
1833	ENST00000380636.1	0.000190372	0.008136757	ENSG00000205542	TMSB4X
1834	ENST00000603357.2	0.000191084	0.008162764	ENSG00000180346	TIGD2
1835	ENST00000156471.9	0.000192074	0.00820057	ENSG00000021776	AQR
1836	ENST00000367627.7	0.000192372	0.008208805	ENSG00000186283	TOR3A
1837	ENST00000487714.1	0.000192894	0.008226617	ENSG00000070669	ASNS
1838	ENST00000585788.1	0.00019365	0.00824022	ENSG00000161091	MFSD12
1839	ENST00000227214.10	0.000193638	0.00824022	ENSG00000021300	PLEKHB1
1840	ENST00000413817.7	0.000193619	0.00824022	ENSG00000205593	DENND6B
1841	ENST00000310300.10	0.000193739	0.00824022	ENSG00000077454	LRCH4
1842	ENST00000258888.5	0.000193386	0.00824022	ENSG00000136383	ALPK3
1843	ENST00000524416.1	0.000194003	0.008246951	ENSG00000051009	FAM160A2
1844	ENST00000310864.10	0.000194188	0.008247351	ENSG00000173226	IQCB1
1845	ENST00000418032.3	0.000194223	0.008247351	ENSG00000167491	GATAD2A
1846	ENST00000277120.7	0.000194716	0.008263827	ENSG00000148053	NTRK2
1847	ENST00000361453.3	0.000196236	0.008323843	ENSG00000198763	MT-ND2
1848	ENST00000475255.5	0.000196438	0.008327887	ENSG00000187764	SEMA4D
1849	ENST00000395851.5	0.00019659	0.008329808	ENSG00000141027	NCOR1
1850	ENST00000492299.1	0.000197295	0.008355163	ENSG00000162374	ELAVL4
1851	ENST00000228515.5	0.000198371	0.008391658	ENSG00000110925	CSRNP2
1852	ENST00000504065.5	0.000198366	0.008391658	ENSG00000108848	LUC7L3
1853	ENST00000376166.5	0.000198863	0.008405231	ENSG00000136754	ABI1
1854	ENST00000370544.9	0.000198906	0.008405231	ENSG00000143013	LMO4
1855	ENST00000465287.1	0.000199928	0.008443872	ENSG00000100105	PATZ1
1856	ENST00000223641.4	0.000200852	0.00847832	ENSG00000106803	SEC61B
1857	ENST00000368003.5	0.000201045	0.008481883	ENSG00000143222	UFC1
1858	ENST00000254351.8	0.000201487	0.008495968	ENSG00000115884	SDC1
1859	ENST00000406189.3	0.000201698	0.008500288	ENSG00000176624	MEX3C
1860	ENST00000568239.1	0.000202338	0.00852269	ENSG00000157106	SMG1
1861	ENST00000608424.5	0.000202871	0.008540542	ENSG00000178252	WDR6
1862	ENST00000534590.5	0.000203525	0.008558848	ENSG00000185627	PSMD13
1863	ENST00000471995.5	0.000203427	0.008558848	ENSG00000003756	RBM5
1864	ENST00000591601.5	0.000203837	0.008567395	ENSG00000099875	MKNK2
1865	ENST00000489173.1	0.000205489	0.008630768	ENSG00000168237	GLYCTK
1866	ENST00000235150.4	0.000205616	0.008630768	ENSG00000116514	RNF19B
1867	ENST00000494261.1	0.000205675	0.008630768	ENSG00000163539	CLASP2
1868	ENST00000252575.10	0.000206093	0.008643662	ENSG00000130287	NCAN
1869	ENST00000209728.8	0.000206615	0.008660915	ENSG00000094804	CDC6
1870	ENST00000579849.5	0.000207217	0.008681498	ENSG00000006042	TMEM98
1871	ENST00000526774.5	0.000207548	0.008690713	ENSG00000052841	TTC17
1872	ENST00000369172.8	0.000208183	0.008691257	ENSG00000165669	FAM204A
1873	ENST00000487509.6	0.000207806	0.008691257	ENSG00000089280	FUS
1874	ENST00000425792.5	0.000208333	0.008691257	ENSG00000182247	UBE2E2
1875	ENST00000394894.7	0.000208169	0.008691257	ENSG00000112984	KIF20A
1876	ENST00000340611.8	0.000208334	0.008691257	ENSG00000106009	BRAT1
1877	ENST00000438466.5	0.000207946	0.008691257	ENSG00000124194	GDAP1L1
1878	ENST00000455242.1	0.000208337	0.008691257	ENSG00000197550	RP11-460N11.2
1879	ENST00000369023.7	0.000208904	0.008710278	ENSG00000107672	NSMCE4A
1880	ENST00000379516.6	0.000209853	0.008745172	ENSG00000205302	SNX2
1881	ENST00000371065.8	0.000210673	0.008774681	ENSG00000213625	LEPROT
1882	ENST00000472531.5	0.000211018	0.00877505	ENSG00000196418	ZNF124
1883	ENST00000379773.6	0.000211011	0.00877505	ENSG00000145349	CAMK2D
1884	ENST00000429715.1	0.000210874	0.00877505	ENSG00000005810	MYCBP2
1885	ENST00000367295.5	0.00021139	0.008785863	ENSG00000134369	NAV1
1886	ENST00000495432.1	0.000211635	0.008788354	ENSG00000129680	MAP7D3
1887	ENST00000472072.5	0.000211674	0.008788354	ENSG00000115687	PASK
1888	ENST00000475590.5	0.000212779	0.008829528	ENSG00000003756	RBM5
1889	ENST00000462025.1	0.000213152	0.008840332	ENSG00000003756	RBM5
1890	ENST00000488653.6	0.000213271	0.008840607	ENSG00000175455	CCDC14
1891	ENST00000295417.3	0.00021381	0.008858259	ENSG00000163251	FZD5
1892	ENST00000443236.5	0.000213989	0.008860977	ENSG00000160111	CPAMD8
1893	ENST00000260563.4	0.000214328	0.008870322	ENSG00000137996	RTCA
1894	ENST00000525846.6	0.000215479	0.008913245	ENSG00000205746	RP11-1212A22.1
1895	ENST00000402676.6	0.000215874	0.008924901	ENSG00000131016	AKAP12
1896	ENST00000347063.8	0.000216687	0.008953777	ENSG00000145428	RNF175
1897	ENST00000320892.10	0.000216841	0.008955413	ENSG00000151692	RNF144A
1898	ENST00000463816.2	0.000217435	0.008965766	ENSG00000198546	ZNF511
1899	ENST00000395530.6	0.000217392	0.008965766	ENSG00000128487	SPECC1
1900	ENST00000381395.5	0.000217229	0.008965766	ENSG00000167244	IGF2
1901	ENST00000399075.6	0.000217625	0.008967884	ENSG00000164096	C4orf3
1902	ENST00000596750.2	0.00021786	0.008967884	ENSG00000011243	AKAP8L
1903	ENST00000436108.6	0.000217889	0.008967884	ENSG00000177830	CHID1
1904	ENST00000315732.2	0.000217944	0.008967884	ENSG00000181817	LSM10
1905	ENST00000424873.5	0.000218426	0.008982981	ENSG00000178162	FAR2P2
1906	ENST00000476784.5	0.000218917	0.00899129	ENSG00000182670	TTC3
1907	ENST00000397410.9	0.000219087	0.00899129	ENSG00000011243	AKAP8L
1908	ENST00000325747.9	0.000218746	0.00899129	ENSG00000103995	CEP152
1909	ENST00000394642.7	0.000219025	0.00899129	ENSG00000006042	TMEM98
1910	ENST00000276659.9	0.000219266	0.008993917	ENSG00000147655	RSPO2
1911	ENST00000610190.1	0.000219643	0.009002668	ENSG00000007168	PAFAH1B1
1912	ENST00000366617.3	0.000219709	0.009002668	ENSG00000183780	SLC35F3
1913	ENST00000303052.12	0.000220405	0.009026461	ENSG00000169118	CSNK1G1
1914	ENST00000629843.2	0.000220913	0.009037822	ENSG00000056487	PHF21B
1915	ENST00000539757.1	0.000220846	0.009037822	ENSG00000111788	RP11-22B23.1
1916	ENST00000350878.8	0.000221556	0.009059411	ENSG00000071054	MAP4K4
1917	ENST00000225964.9	0.000221725	0.009061584	ENSG00000108821	COL1A1
1918	ENST00000396396.5	0.000222215	0.009076874	ENSG00000154330	PGM5
1919	ENST00000300179.6	0.000222786	0.009090702	ENSG00000166924	NYAP1
1920	ENST00000221114.7	0.000222685	0.009090702	ENSG00000104671	DCTN6
1921	ENST00000421367.6	0.000222907	0.009090935	ENSG00000107566	ERLIN1
1922	ENST00000622254.1	0.000223293	0.009101909	ENSG00000168175	MAPK1IP1L
1923	ENST00000612465.1	0.000223431	0.009102792	ENSG00000276256	AC011043.1
1924	ENST00000303155.9	0.000223887	0.009116643	ENSG00000171208	NETO2
1925	ENST00000524109.1	0.000224588	0.009135691	ENSG00000113013	HSPA9
1926	ENST00000216797.9	0.000224494	0.009135691	ENSG00000100906	NFKBIA
1927	ENST00000538334.1	0.000225491	0.009167654	ENSG00000089053	ANAPC5
1928	ENST00000257963.8	0.000225648	0.009169281	ENSG00000135503	ACVR1B
1929	ENST00000629624.1	0.000226336	0.009192494	ENSG00000186007	LEMD1
1930	ENST00000360796.9	0.000227901	0.009251252	ENSG00000168000	BSCL2
1931	ENST00000333479.11	0.000228399	0.009266673	ENSG00000184445	KNTC1
1932	ENST00000287766.8	0.000230637	0.009325101	ENSG00000157103	SLC6A1
1933	ENST00000409916.5	0.000230157	0.009325101	ENSG00000115540	MOB4
1934	ENST00000392502.8	0.000230457	0.009325101	ENSG00000164548	TRA2A
1935	ENST00000360187.8	0.0002306	0.009325101	ENSG00000196458	ZNF605
1936	ENST00000558320.5	0.000230673	0.009325101	ENSG00000137871	ZNF280D
1937	ENST00000261637.4	0.000230196	0.009325101	ENSG00000120800	UTP20
1938	ENST00000373850.5	0.000230597	0.009325101	ENSG00000119397	CNTRL
1939	ENST00000310958.10	0.000230944	0.009331265	ENSG00000260916	CCPG1
1940	ENST00000260746.5	0.000231218	0.009337519	ENSG00000138175	ARL3
1941	ENST00000612828.4	0.000231812	0.009347062	ENSG00000154529	CNTNAP3B
1942	ENST00000396478.3	0.000231649	0.009347062	ENSG00000197429	IPP
1943	ENST00000578529.5	0.000231785	0.009347062	ENSG00000079134	THOC1
1944	ENST00000054650.8	0.00023237	0.009355118	ENSG00000041988	THAP3
1945	ENST00000366691.3	0.000232253	0.009355118	ENSG00000116574	RHOU
1946	ENST00000467789.5	0.000232143	0.009355118	ENSG00000114850	SSR3
1947	ENST00000610179.5	0.000232789	0.009367168	ENSG00000125779	PANK2
1948	ENST00000495562.5	0.000232936	0.00936826	ENSG00000159346	ADIPOR1
1949	ENST00000436881.2	0.000233367	0.009375981	ENSG00000232434	C9orf172
1950	ENST00000380843.8	0.00023327	0.009375981	ENSG00000101365	IDH3B
1951	ENST00000474586.5	0.000233557	0.009378783	ENSG00000164548	TRA2A
1952	ENST00000466213.5	0.000233954	0.00938994	ENSG00000116560	SFPQ
1953	ENST00000614884.1	0.000234701	0.009415095	ENSG00000134574	DDB2
1954	ENST00000440177.6	0.000234972	0.00942112	ENSG00000105722	ERF
1955	ENST00000409111.2	0.000235944	0.009446512	ENSG00000138411	HECW2
1956	ENST00000297157.7	0.000235967	0.009446512	ENSG00000164610	RP9
1957	ENST00000369454.3	0.000235835	0.009446512	ENSG00000155961	RAB39B
1958	ENST00000498426.5	0.000236484	0.009462374	ENSG00000162687	KCNT2
1959	ENST00000377482.9	0.000237182	0.009485469	ENSG00000116285	ERRFI1
1960	ENST00000557290.1	0.000237628	0.009498439	ENSG00000100567	PSMA3
1961	ENST00000301458.9	0.000237861	0.009502906	ENSG00000167775	CD320
1962	ENST00000534358.5	0.00023805	0.009505608	ENSG00000118058	KMT2A
1963	ENST00000466832.5	0.000238361	0.009513193	ENSG00000136527	TRA2B
1964	ENST00000263733.4	0.000239024	0.009534792	ENSG00000116199	FAM20B
1965	ENST00000254942.7	0.000240258	0.0095694	ENSG00000132604	TERF2
1966	ENST00000309602.4	0.000240119	0.0095694	ENSG00000173621	LRFN4
1967	ENST00000273541.12	0.000240248	0.0095694	ENSG00000240682	ISY1
1968	ENST00000610854.1	0.000241449	0.00961066	ENSG00000277586	NEFL
1969	ENST00000301488.7	0.000241539	0.00961066	ENSG00000167797	CDK2AP2
1970	ENST00000409658.7	0.000241733	0.009613479	ENSG00000136709	WDR33
1971	ENST00000278193.6	0.00024229	0.009630769	ENSG00000148943	LIN7C
1972	ENST00000527850.5	0.00024244	0.009631822	ENSG00000014138	POLA2
1973	ENST00000373664.7	0.000242625	0.009634302	ENSG00000080839	RBL1
1974	ENST00000367975.6	0.000242865	0.00963893	ENSG00000143252	SDHC
1975	ENST00000569446.2	0.000243108	0.00964368	ENSG00000261678	SCRT1
1976	ENST00000420906.6	0.000244166	0.009680747	ENSG00000109685	WHSC1
1977	ENST00000486374.5	0.000244307	0.009681446	ENSG00000107863	ARHGAP21
1978	ENST00000513349.5	0.000244557	0.009686464	ENSG00000113360	DROSHA
1979	ENST00000588238.1	0.000245056	0.009701305	ENSG00000167671	UBXN6
1980	ENST00000400928.7	0.000245402	0.009705205	ENSG00000162572	SCNN1D
1981	ENST00000338797.10	0.000245388	0.009705205	ENSG00000105662	CRTC1
1982	ENST00000555393.5	0.000245567	0.009706816	ENSG00000100968	NFATC4
1983	ENST00000456470.1	0.000245887	0.009714598	ENSG00000100379	KCTD17
1984	ENST00000275428.8	0.000246517	0.009729645	ENSG00000006625	GGCT
1985	ENST00000420892.1	0.000246507	0.009729645	ENSG00000166033	HTRA1
1986	ENST00000338779.10	0.000247386	0.009758553	ENSG00000132613	MTSS1L
1987	ENST00000262244.5	0.000247498	0.009758553	ENSG00000120162	MOB3B
1988	ENST00000282058.10	0.000248018	0.009774139	ENSG00000152240	HAUS1
1989	ENST00000329492.5	0.000248543	0.009789897	ENSG00000008735	MAPK8IP2
1990	ENST00000425673.5	0.000248898	0.009798955	ENSG00000090924	PLEKHG2
1991	ENST00000264228.8	0.000250097	0.009841215	ENSG00000128039	SRD5A3
1992	ENST00000380285.7	0.000250609	0.009856413	ENSG00000028528	SNX1
1993	ENST00000578586.1	0.000250882	0.009862178	ENSG00000181396	OGFOD3
1994	ENST00000222374.2	0.000252327	0.00991401	ENSG00000105767	CADM4
1995	ENST00000630362.2	0.000252682	0.009918021	ENSG00000281917	SLC16A1
1996	ENST00000369626.7	0.000252682	0.009918021	ENSG00000155380	SLC16A1
1997	ENST00000263921.7	0.000253972	0.009963676	ENSG00000109220	CHIC2
1998	ENST00000595541.1	0.000254158	0.00996597	ENSG00000127511	SIN3B
1999	ENST00000588847.5	0.000254296	0.009966391	ENSG00000078687	TNRC6C
[truncated: 2,611 more rows]
