# Supplementary material for: Zika infection of neural progenitor cells perturbs transcription in neurodevelopmental pathways
Source: PLoS One. 2017 Apr 27;12(4):e0175744. doi: 10.1371/journal.pone.0175744 (PMC5407828; doi:10.1371/journal.pone.0175744)
Supplement: S2 Table — A list of the differentially expressed genes (gene), their expression levels (val_1, val_2), log 2 fold change (log2.fold_change), and p-values (p_value). (CSV) [file pone.0175744.s002.csv]

gene	sample_1	sample_2	value_1	value_2	log2.fold_change.	p_value
ACACA	Mock	ZIKV	21.3177	27.3666	0.360364	0.00005
RDH11	Mock	ZIKV	46.2791	59.8818	0.371756	0.00005
GAK	Mock	ZIKV	19.3778	25.247	0.381709	0.00005
SACM1L	Mock	ZIKV	17.4955	22.7955	0.381767	0.00005
MYSM1	Mock	ZIKV	14.0997	18.3948	0.383629	0.00005
NACAD	Mock	ZIKV	29.6269	38.6582	0.383866	0.00005
N4BP1	Mock	ZIKV	9.0134	11.761	0.383872	0.00005
PLEKHB2	Mock	ZIKV	24.0748	31.4199	0.384152	0.00005
PPP1R15A	Mock	ZIKV	56.1941	73.4216	0.385787	0.00005
SOBP	Mock	ZIKV	10.7266	14.0164	0.385922	0.00005
COPB1	Mock	ZIKV	45.003	58.8779	0.387703	0.00005
RB1CC1	Mock	ZIKV	22.4146	29.3315	0.388012	0.00005
ATF2	Mock	ZIKV	27.1342	35.5135	0.388258	0.00005
CLIP3	Mock	ZIKV	70.206	91.9533	0.389306	0.00005
TNRC6A	Mock	ZIKV	24.5284	32.1439	0.390087	0.00005
ETF1	Mock	ZIKV	24.9856	32.7727	0.391395	0.00005
LIG4	Mock	ZIKV	12.4207	16.2997	0.3921	0.00005
OXA1L	Mock	ZIKV	45.4672	59.6858	0.392562	0.00005
PPP1R9B	Mock	ZIKV	16.1782	21.2395	0.392694	0.00005
NDUFS1	Mock	ZIKV	27.544	36.2279	0.395362	0.00005
APPBP2	Mock	ZIKV	14.0266	18.4636	0.396518	0.00005
PRR12	Mock	ZIKV	12.2326	16.1071	0.396969	0.00005
GSK3B	Mock	ZIKV	35.1576	46.2939	0.396985	0.00005
PPP3CA	Mock	ZIKV	14.2777	18.8045	0.397316	0.00005
TTC17	Mock	ZIKV	33.867	44.6507	0.398802	0.00005
BCAT1	Mock	ZIKV	26.4883	34.9284	0.399043	0.00005
USP7	Mock	ZIKV	36.3469	47.9564	0.399889	0.00005
CTNNA2	Mock	ZIKV	44.9359	59.3016	0.400203	0.00005
PTEN	Mock	ZIKV	12.4027	16.3703	0.400432	0.00005
CLCN3	Mock	ZIKV	23.9439	31.6062	0.400548	0.00005
MEX3B	Mock	ZIKV	38.1293	50.3369	0.400718	0.00005
SOX4	Mock	ZIKV	166.438	219.73	0.400741	0.00005
TSPYL1	Mock	ZIKV	17.6186	23.2609	0.400809	0.00005
CDK5R1	Mock	ZIKV	39.5099	52.1716	0.401052	0.00005
RBM26	Mock	ZIKV	25.7148	33.9794	0.402061	0.00005
MAU2	Mock	ZIKV	25.3067	33.4433	0.402201	0.00005
PNPLA8	Mock	ZIKV	12.2223	16.1569	0.40264	0.00005
LOC100507217	Mock	ZIKV	80.6178	106.591	0.402918	0.00005
ARID3B	Mock	ZIKV	23.9031	31.6074	0.403065	0.00005
XAB2	Mock	ZIKV	25.7978	34.1341	0.403967	0.00005
STX12	Mock	ZIKV	27.2573	36.1137	0.405905	0.00005
CTTNBP2NL	Mock	ZIKV	11.4394	15.1635	0.406593	0.00005
ZNF445	Mock	ZIKV	12.09	16.0304	0.406996	0.00005
DROSHA	Mock	ZIKV	19.453	25.8234	0.408683	0.00005
SETD2	Mock	ZIKV	20.5122	27.2773	0.411219	0.00005
CHD2	Mock	ZIKV	32.427	43.122	0.411229	0.00005
MED13	Mock	ZIKV	16.6664	22.1633	0.411233	0.00005
ATXN2L	Mock	ZIKV	57.1324	75.9787	0.411286	0.00005
MTMR12	Mock	ZIKV	10.5385	14.0165	0.411451	0.00005
RFX3	Mock	ZIKV	27.9242	37.1546	0.412023	0.00005
TAOK1	Mock	ZIKV	31.5836	42.0405	0.412608	0.00005
IPO13	Mock	ZIKV	12.2867	16.3577	0.412867	0.00005
HIPK1	Mock	ZIKV	17.7916	23.6916	0.413185	0.00005
GRB10	Mock	ZIKV	34.5476	46.008	0.413297	0.00005
SEC24B	Mock	ZIKV	19.1788	25.5443	0.413486	0.00005
EPHA4	Mock	ZIKV	24.2346	32.3287	0.415749	0.00005
SC5DL	Mock	ZIKV	15.2832	20.3991	0.416566	0.00005
PLEKHA5	Mock	ZIKV	20.6868	27.6148	0.416731	0.00005
COPS4	Mock	ZIKV	28.841	38.5407	0.418261	0.00005
C12orf49	Mock	ZIKV	20.6248	27.5615	0.418275	0.00005
EPHA2	Mock	ZIKV	33.6597	44.9841	0.418393	0.00005
HOOK3	Mock	ZIKV	11.6179	15.5281	0.418534	0.00005
UBR5	Mock	ZIKV	35.91	47.9964	0.418539	0.00005
NSF	Mock	ZIKV	16.5409	22.1097	0.418636	0.00005
ASCC2	Mock	ZIKV	15.2746	20.4245	0.41917	0.00005
AHDC1	Mock	ZIKV	17.9549	24.0241	0.420101	0.00005
C11orf84	Mock	ZIKV	25.8391	34.5746	0.420153	0.00005
RAPGEF2	Mock	ZIKV	29.1679	39.034	0.420348	0.00005
NSDHL	Mock	ZIKV	25.0723	33.5537	0.420378	0.00005
PPP1CB	Mock	ZIKV	40.4437	54.1543	0.421162	0.00005
ARFGAP1	Mock	ZIKV	26.424	35.3838	0.421239	0.00005
SMURF1	Mock	ZIKV	13.0435	17.4668	0.42128	0.00005
XIAP	Mock	ZIKV	9.81741	13.1474	0.421368	0.00005
CLSTN3	Mock	ZIKV	34.0455	45.6016	0.42162	0.00005
BTBD10	Mock	ZIKV	19.7615	26.4703	0.421677	0.00005
MTF2	Mock	ZIKV	33.1057	44.3467	0.421747	0.00005
MADD	Mock	ZIKV	20.4305	27.3695	0.421848	0.00005
ATP13A1	Mock	ZIKV	18.8944	25.3138	0.421965	0.00005
JAKMIP2	Mock	ZIKV	9.9234	13.299	0.422409	0.00005
STRN3	Mock	ZIKV	16.6729	22.3469	0.422566	0.00005
SDHA	Mock	ZIKV	28.0405	37.5945	0.423008	0.00005
ZBTB41	Mock	ZIKV	7.42342	9.95294	0.423039	0.00005
SV2A	Mock	ZIKV	22.8289	30.6271	0.42395	0.00005
BTG1	Mock	ZIKV	19.0452	25.5563	0.424254	0.00005
SPCS2	Mock	ZIKV	40.3348	54.1594	0.425186	0.00005
GOLT1B	Mock	ZIKV	17.5863	23.6229	0.425737	0.00005
GORASP1	Mock	ZIKV	17.2442	23.1759	0.426518	0.00005
MAP1B	Mock	ZIKV	183.499	246.73	0.427162	0.00005
SMIM15	Mock	ZIKV	13.3657	17.9715	0.427178	0.00005
CHD8	Mock	ZIKV	24.6835	33.2055	0.427872	0.00005
CACNA1B	Mock	ZIKV	7.1503	9.62391	0.428618	0.00005
MIER1	Mock	ZIKV	8.69855	11.7147	0.429468	0.00005
MVD	Mock	ZIKV	57.9326	78.0321	0.429691	0.00005
SYT4	Mock	ZIKV	41.3637	55.727	0.430011	0.00005
FLJ14186	Mock	ZIKV	10.1777	13.7165	0.430499	0.00005
PKN1	Mock	ZIKV	45.6577	61.5463	0.430814	0.00005
KLF12	Mock	ZIKV	17.9704	24.2307	0.431208	0.00005
UNC13B	Mock	ZIKV	35.6178	48.0418	0.431692	0.00005
TAF4	Mock	ZIKV	9.47824	12.7854	0.431811	0.00005
PHF21B	Mock	ZIKV	61.4769	82.933	0.431901	0.00005
ZRANB1	Mock	ZIKV	24.7088	33.3411	0.432278	0.00005
CCNY	Mock	ZIKV	22.6023	30.5024	0.432454	0.00005
SCN8A	Mock	ZIKV	6.47268	8.7351	0.432462	0.00005
SPIRE1	Mock	ZIKV	15.4053	20.7906	0.432509	0.00005
CLASP2	Mock	ZIKV	64.1468	86.5747	0.432568	0.00005
STAM	Mock	ZIKV	12.089	16.316	0.432598	0.00005
UVRAG	Mock	ZIKV	10.9791	14.8234	0.433106	0.00005
BRPF3	Mock	ZIKV	18.581	25.1002	0.433876	0.00005
PRKAB1	Mock	ZIKV	16.9515	22.901	0.433993	0.00005
SUCLG1	Mock	ZIKV	35.0114	47.3197	0.434618	0.00005
OIP5-AS1	Mock	ZIKV	28.2311	38.1639	0.434927	0.00005
SP3	Mock	ZIKV	20.7656	28.0887	0.435793	0.00005
RALGPS2	Mock	ZIKV	12.7636	17.2732	0.436502	0.00005
USP47	Mock	ZIKV	21.9737	29.7387	0.436565	0.00005
NISCH	Mock	ZIKV	55.1547	74.6495	0.436648	0.00005
PGBD1	Mock	ZIKV	9.46152	12.8063	0.436714	0.00005
RAB3A	Mock	ZIKV	39.6893	53.7654	0.437929	0.00005
CALB1	Mock	ZIKV	16.4815	22.3323	0.438282	0.00005
ALDH2	Mock	ZIKV	29.0674	39.3882	0.438362	0.00005
COG6	Mock	ZIKV	9.83586	13.3348	0.43907	0.00005
RANBP6	Mock	ZIKV	19.7559	26.7878	0.439297	0.00005
SNRNP48	Mock	ZIKV	8.27058	11.2188	0.439863	0.00005
CD164	Mock	ZIKV	20.8709	28.3269	0.440682	0.00005
CWC25	Mock	ZIKV	9.25501	12.5668	0.441307	0.00005
ARFGEF2	Mock	ZIKV	8.15456	11.0754	0.441677	0.00005
NXPE3	Mock	ZIKV	5.49115	7.45881	0.441836	0.00005
RPRD2	Mock	ZIKV	13.5563	18.414	0.441847	0.00005
SLC9A6	Mock	ZIKV	11.7404	15.9484	0.441922	0.00005
SRSF8	Mock	ZIKV	16.968	23.0497	0.44193	0.00005
CNNM4	Mock	ZIKV	6.48027	8.80675	0.442555	0.00005
ISLR2	Mock	ZIKV	86.02	116.943	0.443055	0.00005
SEC23IP	Mock	ZIKV	7.98036	10.8501	0.443185	0.00005
REV1	Mock	ZIKV	12.9475	17.6058	0.443378	0.00005
CBLL1	Mock	ZIKV	9.13551	12.4276	0.443988	0.00005
SHC2	Mock	ZIKV	34.5248	46.9695	0.44409	0.00005
SUZ12	Mock	ZIKV	21.4414	29.1725	0.444214	0.00005
EEF1A2	Mock	ZIKV	50.0556	68.1275	0.444704	0.00005
CDKN1A	Mock	ZIKV	53.9696	73.4565	0.444744	0.00005
HSPA4L	Mock	ZIKV	19.19	26.1227	0.444948	0.00005
PPP1R2	Mock	ZIKV	18.1889	24.7629	0.445118	0.00005
RANBP2	Mock	ZIKV	16.5857	22.5817	0.445214	0.00005
L1CAM	Mock	ZIKV	44.5806	60.6998	0.445278	0.00005
TET1	Mock	ZIKV	7.07065	9.62739	0.445302	0.00005
RAPGEF6	Mock	ZIKV	12.772	17.3943	0.445628	0.00005
UBE2J2	Mock	ZIKV	20.7814	28.3053	0.44578	0.00005
MRPS35	Mock	ZIKV	18.6642	25.4219	0.445802	0.00005
RBM6	Mock	ZIKV	76.8382	104.673	0.445995	0.00005
PRKCI	Mock	ZIKV	15.3813	20.9587	0.446369	0.00005
IGF2R	Mock	ZIKV	25.3783	34.5877	0.446665	0.00005
SASH1	Mock	ZIKV	7.75069	10.5667	0.447123	0.00005
ZNF777	Mock	ZIKV	9.76958	13.3243	0.447692	0.00005
MORC3	Mock	ZIKV	11.5887	15.8081	0.447951	0.00005
RAB40C	Mock	ZIKV	14.3378	19.5628	0.448292	0.00005
NMNAT2	Mock	ZIKV	20.1135	27.4509	0.448686	0.00005
MANF	Mock	ZIKV	59.3645	81.0439	0.449104	0.00005
MMS19	Mock	ZIKV	21.9018	29.9064	0.449403	0.00005
SRRM3	Mock	ZIKV	8.83211	12.0645	0.449935	0.00005
SERP1	Mock	ZIKV	32.2561	44.08	0.450551	0.00005
SAMM50	Mock	ZIKV	24.7107	33.7689	0.45056	0.00005
BICD1	Mock	ZIKV	11.1369	15.2198	0.450591	0.00005
CLOCK	Mock	ZIKV	5.77719	7.89651	0.450847	0.00005
SPTAN1	Mock	ZIKV	85.7415	117.203	0.450948	0.00005
RNF2	Mock	ZIKV	14.7405	20.1519	0.451136	0.00005
ATE1	Mock	ZIKV	14.8413	20.2967	0.451626	0.00005
ACBD5	Mock	ZIKV	8.67978	11.8742	0.452094	0.00005
UNC5C	Mock	ZIKV	13.6737	18.708	0.452257	0.00005
ZNF516	Mock	ZIKV	8.76706	11.9974	0.452555	0.00005
PPP6R1	Mock	ZIKV	20.6211	28.2196	0.452576	0.00005
EFHA2	Mock	ZIKV	6.49446	8.88913	0.452833	0.00005
ELK4	Mock	ZIKV	5.7794	7.91119	0.452976	0.00005
PTBP3	Mock	ZIKV	13.9964	19.1664	0.453529	0.00005
ZFR	Mock	ZIKV	50.1003	68.607	0.453536	0.00005
ARL5A	Mock	ZIKV	16.531	22.6396	0.453676	0.00005
TAX1BP1	Mock	ZIKV	48.7233	66.7281	0.453684	0.00005
DCK	Mock	ZIKV	18.4623	25.2911	0.454048	0.00005
TACC1	Mock	ZIKV	4.53077	6.20793	0.454358	0.00005
MARK3	Mock	ZIKV	36.0535	49.4018	0.454422	0.00005
AP1AR	Mock	ZIKV	16.7447	22.9468	0.454583	0.00005
TMEM178B	Mock	ZIKV	10.7844	14.7819	0.454887	0.00005
DRG1	Mock	ZIKV	34.9335	47.8999	0.455411	0.00005
FUBP3	Mock	ZIKV	32.0658	44.0003	0.456478	0.00005
UFSP2	Mock	ZIKV	12.8717	17.6632	0.456547	0.00005
ACTR8	Mock	ZIKV	11.5591	15.8632	0.456661	0.00005
CLTB	Mock	ZIKV	37.477	51.4732	0.457814	0.00005
CYLD	Mock	ZIKV	5.12987	7.04924	0.458546	0.00005
RHOT1	Mock	ZIKV	34.4885	47.3931	0.45856	0.00005
ARIH1	Mock	ZIKV	21.6381	29.7447	0.459061	0.00005
TESK1	Mock	ZIKV	12.8755	17.7117	0.460073	0.00005
COPS2	Mock	ZIKV	23.2981	32.0498	0.460102	0.00005
CAPZA2	Mock	ZIKV	36.4714	50.1728	0.460138	0.00005
RRN3	Mock	ZIKV	14.6287	20.1327	0.460739	0.00005
ARHGEF11	Mock	ZIKV	13.0303	17.9365	0.46103	0.00005
LEMD3	Mock	ZIKV	13.2509	18.2402	0.461036	0.00005
DNMT3A	Mock	ZIKV	31.0072	42.6925	0.461381	0.00005
MTRF1L	Mock	ZIKV	10.1845	14.0244	0.461568	0.00005
NRIP1	Mock	ZIKV	12.8677	17.7196	0.461586	0.00005
TRIM8	Mock	ZIKV	26.5608	36.5843	0.461927	0.00005
C5orf30	Mock	ZIKV	13.0209	17.9371	0.462111	0.00005
PPP3R1	Mock	ZIKV	22.4747	30.9651	0.462343	0.00005
PRKAB2	Mock	ZIKV	11.1216	15.325	0.462518	0.00005
WWC2	Mock	ZIKV	8.70487	11.9964	0.462701	0.00005
RBM25	Mock	ZIKV	67.7827	93.4132	0.462709	0.00005
ZNF672	Mock	ZIKV	12.3258	16.989	0.462916	0.00005
TRA2B	Mock	ZIKV	49.921	68.8156	0.463089	0.00005
DAPK3	Mock	ZIKV	28.5624	39.373	0.463093	0.00005
CHP1	Mock	ZIKV	23.2622	32.07	0.463238	0.00005
TSC22D1	Mock	ZIKV	60.6945	83.6859	0.46342	0.00005
SPTLC1	Mock	ZIKV	26.4628	36.4952	0.463745	0.00005
TBC1D10B	Mock	ZIKV	22.093	30.4692	0.463764	0.00005
BTBD1	Mock	ZIKV	21.6211	29.8302	0.46433	0.00005
ZNF259	Mock	ZIKV	16.38	22.6057	0.464748	0.00005
DHX36	Mock	ZIKV	29.1802	40.2734	0.464835	0.00005
SLC25A36	Mock	ZIKV	44.1753	60.975	0.464977	0.00005
ZCCHC3	Mock	ZIKV	23.5004	32.4489	0.465481	0.00005
SCAMP1	Mock	ZIKV	12.4772	17.2312	0.465732	0.00005
RAB3B	Mock	ZIKV	6.96452	9.62191	0.466299	0.00005
CRELD2	Mock	ZIKV	19.6385	27.14	0.466738	0.00005
TNIK	Mock	ZIKV	11.7325	16.2158	0.466892	0.00005
DDX39B	Mock	ZIKV	182.556	252.319	0.466909	0.00005
CACNA2D1	Mock	ZIKV	27.104	37.476	0.467461	0.00005
SCAPER	Mock	ZIKV	8.9371	12.3595	0.467739	0.00005
TMX4	Mock	ZIKV	23.9355	33.1029	0.467806	0.00005
FNBP4	Mock	ZIKV	36.118	49.9638	0.468167	0.00005
PHRF1	Mock	ZIKV	10.1476	14.0381	0.468205	0.00005
ZNF317	Mock	ZIKV	8.77808	12.1438	0.468238	0.00005
R3HDM4	Mock	ZIKV	30.149	41.7142	0.468432	0.00005
RNF168	Mock	ZIKV	7.04879	9.75473	0.468727	0.00005
RNF139	Mock	ZIKV	18.3303	25.3681	0.468783	0.00005
LGR4	Mock	ZIKV	10.0682	13.936	0.469009	0.00005
CXXC5	Mock	ZIKV	49.26	68.1855	0.46905	0.00005
SMEK2	Mock	ZIKV	24.0926	33.3581	0.469447	0.00005
ZNF641	Mock	ZIKV	7.24127	10.0318	0.470269	0.00005
CNGB1	Mock	ZIKV	10.3884	14.3938	0.470483	0.00005
XPO6	Mock	ZIKV	28.3797	39.3233	0.470523	0.00005
TULP4	Mock	ZIKV	8.62144	11.9464	0.47057	0.00005
DNAJB14	Mock	ZIKV	9.7199	13.4702	0.470753	0.00005
ANKRD11	Mock	ZIKV	39.7328	55.0787	0.471166	0.00005
FAM91A1	Mock	ZIKV	9.71551	13.4697	0.471361	0.00005
MOB1B	Mock	ZIKV	16.7456	23.2172	0.471418	0.00005
PIK3C2B	Mock	ZIKV	14.0546	19.4863	0.47142	0.00005
THAP5	Mock	ZIKV	13.2293	18.3438	0.471565	0.00005
ZNF35	Mock	ZIKV	6.70237	9.30027	0.472601	0.00005
PRPF18	Mock	ZIKV	12.4456	17.2769	0.47321	0.00005
HSF2	Mock	ZIKV	24.3387	33.7884	0.47328	0.00005
AFF1	Mock	ZIKV	8.70976	12.0918	0.47332	0.00005
ACVR1B	Mock	ZIKV	20.9038	29.0215	0.473353	0.00005
PRKAR2A	Mock	ZIKV	16.0116	22.2302	0.473404	0.00005
PDIK1L	Mock	ZIKV	7.09121	9.84831	0.473844	0.00005
RAB8B	Mock	ZIKV	26.3001	36.5272	0.473903	0.00005
CTTNBP2	Mock	ZIKV	3.91746	5.44144	0.47407	0.00005
BCAR1	Mock	ZIKV	21.6534	30.0807	0.474249	0.00005
GPATCH2L	Mock	ZIKV	13.7121	19.054	0.474646	0.00005
TSNAX	Mock	ZIKV	22.7301	31.5967	0.475169	0.00005
DCP2	Mock	ZIKV	8.62602	11.9938	0.475517	0.00005
EMC3	Mock	ZIKV	29.1842	40.5857	0.475786	0.00005
CSNK1G3	Mock	ZIKV	11.3607	15.8012	0.47598	0.00005
RNF11	Mock	ZIKV	45.8187	63.7292	0.476017	0.00005
SMAD2	Mock	ZIKV	7.89811	10.9864	0.476135	0.00005
CIC	Mock	ZIKV	26.8873	37.4137	0.476642	0.00005
ASUN	Mock	ZIKV	7.84563	10.9197	0.47697	0.00005
NR2F6	Mock	ZIKV	29.5367	41.1215	0.477384	0.00005
LRRFIP2	Mock	ZIKV	15.3446	21.3667	0.477633	0.00005
RSL1D1	Mock	ZIKV	20.5689	28.6496	0.478048	0.00005
TTC33	Mock	ZIKV	7.24141	10.0909	0.478718	0.00005
GPHN	Mock	ZIKV	11.4156	15.9094	0.478872	0.00005
KIAA1430	Mock	ZIKV	12.7102	17.716	0.479057	0.00005
RND3	Mock	ZIKV	53.6291	74.756	0.479172	0.00005
NRP1	Mock	ZIKV	23.5636	32.8486	0.479272	0.00005
HINT3	Mock	ZIKV	18.0604	25.1773	0.479294	0.00005
KCTD3	Mock	ZIKV	20.3912	28.4346	0.479701	0.00005
DSTN	Mock	ZIKV	42.9514	59.8972	0.479783	0.00005
CACNA1C	Mock	ZIKV	4.53982	6.33165	0.479945	0.00005
SYNE1	Mock	ZIKV	2.29744	3.20432	0.479992	0.00005
WDR75	Mock	ZIKV	20.5732	28.696	0.480083	0.00005
BBS7	Mock	ZIKV	10.6532	14.8597	0.480116	0.00005
MAPT	Mock	ZIKV	20.4844	28.5731	0.480128	0.00005
MED23	Mock	ZIKV	9.93608	13.8603	0.480208	0.00005
PANK3	Mock	ZIKV	48.0681	67.057	0.480307	0.00005
PPM1A	Mock	ZIKV	15.2719	21.3173	0.481144	0.00005
CRK	Mock	ZIKV	19.8616	27.7417	0.482075	0.00005
DNMBP	Mock	ZIKV	3.75362	5.2437	0.482301	0.00005
SUPT20H	Mock	ZIKV	36.1092	50.4569	0.482684	0.00005
TCEA2	Mock	ZIKV	23.42	32.7291	0.482831	0.00005
SPEN	Mock	ZIKV	23.3458	32.6262	0.482865	0.00005
NAA60	Mock	ZIKV	19.5402	27.3115	0.48306	0.00005
RCOR1	Mock	ZIKV	10.5807	14.7946	0.483641	0.00005
HECTD4	Mock	ZIKV	18.9484	26.5014	0.483994	0.00005
WAC	Mock	ZIKV	36.5494	51.125	0.484182	0.00005
TET3	Mock	ZIKV	19.9359	27.8908	0.484419	0.00005
LPIN1	Mock	ZIKV	17.5233	24.5162	0.484458	0.00005
MSMO1	Mock	ZIKV	80.1916	112.199	0.484542	0.00005
CLSTN2	Mock	ZIKV	10.0719	14.0938	0.484733	0.00005
WASL	Mock	ZIKV	14.3299	20.0526	0.484756	0.00005
UBXN7	Mock	ZIKV	21.6928	30.3725	0.485547	0.00005
EMC8	Mock	ZIKV	15.2681	21.3772	0.485557	0.00005
SCAF4	Mock	ZIKV	20.4326	28.6095	0.485621	0.00005
KTN1	Mock	ZIKV	39.8118	55.7676	0.48623	0.00005
TAPT1	Mock	ZIKV	8.59078	12.034	0.486254	0.00005
SEC16A	Mock	ZIKV	19.5049	27.3235	0.486304	0.00005
CELSR3	Mock	ZIKV	21.8125	30.5668	0.48681	0.00005
EIF2B2	Mock	ZIKV	20.1998	28.3077	0.48685	0.00005
FAM179B	Mock	ZIKV	6.31284	8.84711	0.486918	0.00005
RNF111	Mock	ZIKV	9.25239	12.9688	0.487144	0.00005
CCAR1	Mock	ZIKV	46.4776	65.1556	0.487355	0.00005
IL6ST	Mock	ZIKV	6.69516	9.38614	0.487414	0.00005
MYCBP2	Mock	ZIKV	11.171	15.6627	0.487568	0.00005
TMEM11	Mock	ZIKV	10.5826	14.8379	0.487596	0.00005
SERINC3	Mock	ZIKV	25.6809	36.0145	0.487883	0.00005
USP11	Mock	ZIKV	89.7676	125.908	0.488098	0.00005
MANBA	Mock	ZIKV	6.17492	8.66129	0.488162	0.00005
SURF4	Mock	ZIKV	53.6877	75.3173	0.488391	0.00005
LRRC58	Mock	ZIKV	5.9804	8.39069	0.488547	0.00005
GUK1	Mock	ZIKV	62.2955	87.4209	0.48885	0.00005
COPB2	Mock	ZIKV	45.0224	63.1876	0.488998	0.00005
KLHDC2	Mock	ZIKV	35.1307	49.3056	0.489021	0.00005
FOXN3	Mock	ZIKV	11.2716	15.8231	0.489349	0.00005
GOLPH3	Mock	ZIKV	28.9169	40.6013	0.489612	0.00005
RNF31	Mock	ZIKV	13.4925	18.9451	0.489661	0.00005
AVL9	Mock	ZIKV	13.6492	19.1663	0.489758	0.00005
BNIP3	Mock	ZIKV	23.7632	33.3701	0.489827	0.00005
MEX3C	Mock	ZIKV	21.9689	30.8751	0.490986	0.00005
PELI1	Mock	ZIKV	22.2096	31.2264	0.491584	0.00005
LRCH4	Mock	ZIKV	18.4334	25.9174	0.491597	0.00005
ZBTB11	Mock	ZIKV	7.65105	10.7578	0.491649	0.00005
RIMKLB	Mock	ZIKV	25.0237	35.1892	0.491838	0.00005
YPEL5	Mock	ZIKV	36.8376	51.8031	0.491861	0.00005
MNT	Mock	ZIKV	14.4939	20.3829	0.49191	0.00005
SCOC	Mock	ZIKV	61.8391	86.9694	0.491987	0.00005
CCNL1	Mock	ZIKV	46.5612	65.4841	0.492016	0.00005
ZNF410	Mock	ZIKV	19.7879	27.8337	0.492217	0.00005
CBX6	Mock	ZIKV	10.3914	14.622	0.49275	0.00005
CLUAP1	Mock	ZIKV	9.11949	12.8379	0.493385	0.00005
C6orf62	Mock	ZIKV	47.9474	67.5178	0.493813	0.00005
HID1	Mock	ZIKV	13.248	18.6627	0.494379	0.00005
AAK1	Mock	ZIKV	5.1987	7.32513	0.494703	0.00005
MLL	Mock	ZIKV	20.8063	29.3181	0.494776	0.00005
ZBTB44	Mock	ZIKV	9.26132	13.0523	0.495019	0.00005
TJP1	Mock	ZIKV	20.9623	29.5459	0.495162	0.00005
SELT	Mock	ZIKV	25.2483	35.5934	0.495423	0.00005
AP3B1	Mock	ZIKV	11.7127	16.5133	0.495554	0.00005
EPT1	Mock	ZIKV	11.8196	16.666	0.495728	0.00005
FLJ45340	Mock	ZIKV	15.0424	21.2133	0.495929	0.00005
ACSL4	Mock	ZIKV	13.2445	18.6823	0.496272	0.00005
NDUFAF5	Mock	ZIKV	6.30434	8.89342	0.496393	0.00005
PITPNM1	Mock	ZIKV	38.3458	54.1118	0.496876	0.00005
SETD5	Mock	ZIKV	42.253	59.653	0.49754	0.00005
ADCY9	Mock	ZIKV	5.03693	7.11186	0.497682	0.00005
CNOT3	Mock	ZIKV	25.8113	36.4463	0.49777	0.00005
HSPA13	Mock	ZIKV	36.0304	50.8897	0.498157	0.00005
NOL10	Mock	ZIKV	6.88785	9.72855	0.498171	0.00005
PPP4R2	Mock	ZIKV	39.2966	55.516	0.498499	0.00005
THOC1	Mock	ZIKV	25.8532	36.5257	0.498566	0.00005
RASA3	Mock	ZIKV	13.4326	18.9793	0.498683	0.00005
CAB39	Mock	ZIKV	29.5821	41.7992	0.498753	0.00005
PPP1R16A	Mock	ZIKV	18.5109	26.1567	0.498808	0.00005
ZNF510	Mock	ZIKV	7.1678	10.1285	0.498819	0.00005
PDIA4	Mock	ZIKV	59.6727	84.3264	0.498913	0.00005
ZNF12	Mock	ZIKV	7.34797	10.384	0.498951	0.00005
FAM65A	Mock	ZIKV	15.8088	22.3499	0.499544	0.00005
RSF1	Mock	ZIKV	22.2379	31.4485	0.499971	0.00005
TBCEL	Mock	ZIKV	6.80261	9.62314	0.500419	0.00005
SYT13	Mock	ZIKV	16.9297	23.9534	0.500675	0.00005
KLHDC10	Mock	ZIKV	15.1295	21.4065	0.50068	0.00005
RHEB	Mock	ZIKV	45.7655	64.7585	0.500807	0.00005
NFU1	Mock	ZIKV	20.5656	29.1032	0.500944	0.00005
SLMAP	Mock	ZIKV	9.07743	12.849	0.501303	0.00005
ARL8A	Mock	ZIKV	24.5867	34.8112	0.501671	0.00005
PRPF4	Mock	ZIKV	12.0792	17.1028	0.501698	0.00005
VPS37D	Mock	ZIKV	14.255	20.1918	0.502297	0.00005
RAB31	Mock	ZIKV	10.5587	14.9619	0.502867	0.00005
SYF2	Mock	ZIKV	22.4668	31.8425	0.503162	0.00005
BOD1L1	Mock	ZIKV	15.5251	22.0204	0.504238	0.00005
SLC9A7	Mock	ZIKV	2.80427	3.97778	0.504339	0.00005
DYRK2	Mock	ZIKV	13.7327	19.4795	0.504342	0.00005
ZNF212	Mock	ZIKV	7.8787	11.1774	0.504556	0.00005
ZYG11B	Mock	ZIKV	9.85215	13.9818	0.505036	0.00005
NFX1	Mock	ZIKV	11.7206	16.6415	0.505735	0.00005
CCNG2	Mock	ZIKV	18.6211	26.4405	0.505808	0.00005
STK40	Mock	ZIKV	21.9746	31.2105	0.506194	0.00005
MTSS1L	Mock	ZIKV	21.3148	30.2907	0.50702	0.00005
DOCK4	Mock	ZIKV	5.34453	7.59666	0.507302	0.00005
CPEB4	Mock	ZIKV	9.40253	13.3699	0.507869	0.00005
SIK1	Mock	ZIKV	5.3925	7.66845	0.507981	0.00005
NGDN	Mock	ZIKV	22.832	32.4724	0.508156	0.00005
FAM222B	Mock	ZIKV	10.4477	14.8606	0.508304	0.00005
EDEM3	Mock	ZIKV	9.72263	13.834	0.508802	0.00005
PPFIA1	Mock	ZIKV	20.4284	29.0688	0.508893	0.00005
KIAA1671	Mock	ZIKV	3.32452	4.73086	0.508957	0.00005
PPP1R12A	Mock	ZIKV	22.2015	31.5935	0.50897	0.00005
UBR4	Mock	ZIKV	26.3646	37.5361	0.509677	0.00005
SOCS6	Mock	ZIKV	7.2533	10.3278	0.509829	0.00005
TSC1	Mock	ZIKV	11.7669	16.7574	0.510056	0.00005
PEX13	Mock	ZIKV	7.4703	10.646	0.511079	0.00005
15-Sep	Mock	ZIKV	44.9733	64.0982	0.511213	0.00005
GOPC	Mock	ZIKV	14.8936	21.2293	0.511364	0.00005
RNF10	Mock	ZIKV	37.2631	53.1209	0.511534	0.00005
VTI1A	Mock	ZIKV	5.16027	7.35809	0.511885	0.00005
ZNF8	Mock	ZIKV	9.25503	13.1971	0.511915	0.00005
SLC25A46	Mock	ZIKV	18.4365	26.2902	0.511962	0.00005
GADD45A	Mock	ZIKV	62.5887	89.2547	0.512025	0.00005
CSRNP2	Mock	ZIKV	19.3533	27.6107	0.512645	0.00005
RPN1	Mock	ZIKV	79.623	113.649	0.513322	0.00005
ATP1A3	Mock	ZIKV	100.677	143.727	0.513593	0.00005
TMEM170B	Mock	ZIKV	15.3075	21.854	0.513659	0.00005
MTPAP	Mock	ZIKV	4.91354	7.01617	0.513921	0.00005
ZFAND3	Mock	ZIKV	53.149	75.8945	0.513953	0.00005
TEX10	Mock	ZIKV	11.0868	15.8327	0.514066	0.00005
DESI2	Mock	ZIKV	14.1334	20.1846	0.514147	0.00005
WDR91	Mock	ZIKV	4.58906	6.55542	0.514492	0.00005
DNAJA2	Mock	ZIKV	23.7317	33.9101	0.514902	0.00005
KDM3A	Mock	ZIKV	21.9437	31.3595	0.515098	0.00005
NCOA3	Mock	ZIKV	8.00989	11.4497	0.515461	0.00005
TMTC1	Mock	ZIKV	2.2821	3.26372	0.516154	0.00005
CLK2	Mock	ZIKV	23.5621	33.7024	0.516385	0.00005
TSC22D4	Mock	ZIKV	7.75957	11.1006	0.516585	0.00005
DNTTIP1	Mock	ZIKV	20.9457	29.9646	0.516602	0.00005
FAM171B	Mock	ZIKV	9.69728	13.8744	0.51677	0.00005
CEP120	Mock	ZIKV	10.8991	15.5952	0.516903	0.00005
GTF2F1	Mock	ZIKV	39.6268	56.7028	0.516943	0.00005
SCYL2	Mock	ZIKV	29.7364	42.5792	0.51792	0.00005
PAPOLG	Mock	ZIKV	5.80699	8.31899	0.518616	0.00005
UBE2J1	Mock	ZIKV	21.534	30.8527	0.518781	0.00005
DFNB31	Mock	ZIKV	12.0285	17.2362	0.518978	0.00005
ANKRD46	Mock	ZIKV	21.5495	30.8839	0.5192	0.00005
PFDN4	Mock	ZIKV	23.3157	33.4178	0.519317	0.00005
KIAA1033	Mock	ZIKV	12.9949	18.6295	0.519638	0.00005
IFRD1	Mock	ZIKV	23.294	33.3967	0.519746	0.00005
SMAP1	Mock	ZIKV	21.1571	30.3499	0.52055	0.00005
ATAD1	Mock	ZIKV	29.1986	41.8974	0.520962	0.00005
ZNHIT6	Mock	ZIKV	3.74107	5.37007	0.521491	0.00005
GDF1	Mock	ZIKV	19.3306	27.757	0.521968	0.00005
TBC1D22B	Mock	ZIKV	6.43024	9.23343	0.521995	0.00005
DDX55	Mock	ZIKV	12.8634	18.4721	0.522068	0.00005
FLYWCH1	Mock	ZIKV	13.7471	19.7467	0.522488	0.00005
FEM1A	Mock	ZIKV	9.52145	13.6796	0.522773	0.00005
BBX	Mock	ZIKV	11.8033	16.9625	0.523159	0.00005
RNF181	Mock	ZIKV	40.0219	57.5154	0.523159	0.00005
PTAR1	Mock	ZIKV	11.9751	17.2184	0.523906	0.00005
RPS6KA4	Mock	ZIKV	4.95984	7.13287	0.52419	0.00005
TFAM	Mock	ZIKV	11.0086	15.8322	0.524228	0.00005
MID1IP1	Mock	ZIKV	11.2832	16.2328	0.524738	0.00005
MAP3K2	Mock	ZIKV	8.59231	12.362	0.524794	0.00005
P4HA1	Mock	ZIKV	12.6083	18.1445	0.52516	0.00005
KDM6A	Mock	ZIKV	9.00903	12.9653	0.525213	0.00005
SNX30	Mock	ZIKV	12.0592	17.3563	0.525317	0.00005
ATP6V1A	Mock	ZIKV	23.9689	34.5059	0.525677	0.00005
KANSL2	Mock	ZIKV	15.3639	22.1184	0.525703	0.00005
CELF1	Mock	ZIKV	41.1441	59.234	0.52574	0.00005
C5orf22	Mock	ZIKV	13.7497	19.7955	0.525774	0.00005
NAP1L3	Mock	ZIKV	16.9212	24.3691	0.526224	0.00005
SNX9	Mock	ZIKV	8.2817	11.9276	0.526299	0.00005
TOM1L2	Mock	ZIKV	12.4285	17.9054	0.526747	0.00005
SIRT1	Mock	ZIKV	13.6635	19.686	0.526842	0.00005
METTL16	Mock	ZIKV	7.75677	11.1764	0.52693	0.00005
TMEM66	Mock	ZIKV	168.497	242.786	0.526964	0.00005
NOB1	Mock	ZIKV	13.5686	19.5511	0.526974	0.00005
VIPAS39	Mock	ZIKV	11.3057	16.2958	0.527446	0.00005
OAZ1	Mock	ZIKV	213.443	307.675	0.527551	0.00005
TRIO	Mock	ZIKV	27.0634	39.0158	0.527711	0.00005
CNTN1	Mock	ZIKV	3.92298	5.65684	0.528048	0.00005
WDR45B	Mock	ZIKV	33.481	48.3111	0.529011	0.00005
CDK5R2	Mock	ZIKV	6.56779	9.47824	0.529212	0.00005
FBXO38	Mock	ZIKV	12.9098	18.6328	0.529382	0.00005
SCN3B	Mock	ZIKV	10.0866	14.5595	0.529522	0.00005
FAT3	Mock	ZIKV	7.21427	10.4201	0.530443	0.00005
FER	Mock	ZIKV	5.72205	8.26588	0.530637	0.00005
FAF1	Mock	ZIKV	17.2567	24.9309	0.530783	0.00005
RAB3GAP2	Mock	ZIKV	11.3036	16.3349	0.531182	0.00005
ZNF282	Mock	ZIKV	9.68326	13.9979	0.531649	0.00005
SRPR	Mock	ZIKV	31.3029	45.2612	0.531979	0.00005
BAI1	Mock	ZIKV	2.72702	3.94334	0.532095	0.00005
ACOX1	Mock	ZIKV	5.65767	8.18259	0.532349	0.00005
KDM6B	Mock	ZIKV	25.1169	36.3374	0.532795	0.00005
FBXO3	Mock	ZIKV	21.5427	31.1809	0.533465	0.00005
RPS6KB1	Mock	ZIKV	10.0637	14.5686	0.533694	0.00005
POFUT2	Mock	ZIKV	16.8355	24.3905	0.534817	0.00005
FAM73A	Mock	ZIKV	3.75299	5.43796	0.535023	0.00005
CREB5	Mock	ZIKV	3.37215	4.88622	0.535048	0.00005
ZBTB10	Mock	ZIKV	15.0662	21.836	0.535399	0.00005
SLC25A12	Mock	ZIKV	10.0043	14.504	0.535837	0.00005
ZNF10	Mock	ZIKV	6.07842	8.81315	0.535961	0.00005
UBR2	Mock	ZIKV	9.66568	14.0145	0.535976	0.00005
VAPA	Mock	ZIKV	22.1565	32.132	0.536278	0.00005
PTPN13	Mock	ZIKV	27.7584	40.2709	0.536811	0.00005
TMED7	Mock	ZIKV	23.6883	34.3787	0.53734	0.00005
RAP2B	Mock	ZIKV	8.72718	12.6671	0.537502	0.00005
ZBTB38	Mock	ZIKV	2.75425	3.99784	0.537564	0.00005
LRP1	Mock	ZIKV	33.29	48.3297	0.537822	0.00005
CCNT2	Mock	ZIKV	21.3165	30.96	0.538433	0.00005
PTPRE	Mock	ZIKV	3.70448	5.38042	0.538449	0.00005
LHFP	Mock	ZIKV	17.5652	25.5173	0.53876	0.00005
KIAA1468	Mock	ZIKV	9.64199	14.0092	0.538969	0.00005
C5orf51	Mock	ZIKV	12.6786	18.4213	0.538978	0.00005
EIF5	Mock	ZIKV	58.9038	85.585	0.538998	0.00005
SNRNP27	Mock	ZIKV	28.1477	40.9132	0.539549	0.00005
COG1	Mock	ZIKV	12.4277	18.0666	0.539771	0.00005
ABHD10	Mock	ZIKV	16.4596	23.9331	0.540079	0.00005
NKAP	Mock	ZIKV	13.5043	19.6369	0.540144	0.00005
TLK1	Mock	ZIKV	15.1829	22.0796	0.540269	0.00005
RHBDD2	Mock	ZIKV	87.0409	126.591	0.540407	0.00005
CCDC117	Mock	ZIKV	9.17807	13.3523	0.540823	0.00005
LRIG2	Mock	ZIKV	6.38774	9.29601	0.541306	0.00005
KLHL2	Mock	ZIKV	8.33326	12.1286	0.541454	0.00005
CEP104	Mock	ZIKV	7.73992	11.2678	0.541808	0.00005
KDM4A	Mock	ZIKV	22.6525	32.9865	0.542206	0.00005
ZZEF1	Mock	ZIKV	9.4785	13.8039	0.542346	0.00005
FAM131A	Mock	ZIKV	17.904	26.0847	0.542922	0.00005
PITRM1	Mock	ZIKV	18.2285	26.5623	0.54318	0.00005
SESN3	Mock	ZIKV	13.6142	19.8407	0.543351	0.00005
DOCK3	Mock	ZIKV	9.32638	13.5922	0.543394	0.00005
RAP1A	Mock	ZIKV	14.5229	21.171	0.543761	0.00005
UBE2B	Mock	ZIKV	19.0738	27.8058	0.543798	0.00005
GSPT2	Mock	ZIKV	19.0739	27.8222	0.544636	0.00005
7-Mar	Mock	ZIKV	32.1906	46.9564	0.544682	0.00005
EFR3A	Mock	ZIKV	5.55804	8.10774	0.544723	0.00005
PRKACB	Mock	ZIKV	21.3643	31.168	0.544866	0.00005
ZC3H8	Mock	ZIKV	9.49659	13.8559	0.545022	0.00005
TET2	Mock	ZIKV	12.1256	17.6938	0.545188	0.00005
FERMT2	Mock	ZIKV	14.5359	21.215	0.545466	0.00005
HELZ2	Mock	ZIKV	5.19818	7.58674	0.545474	0.00005
PHLDA3	Mock	ZIKV	21.0214	30.6867	0.54575	0.00005
MAP2K4	Mock	ZIKV	23.8032	34.7526	0.545963	0.00005
UFL1	Mock	ZIKV	12.6992	18.5413	0.546007	0.00005
PIM2	Mock	ZIKV	4.6691	6.81943	0.546507	0.00005
SFSWAP	Mock	ZIKV	25.521	37.2925	0.547197	0.00005
JHDM1D	Mock	ZIKV	8.19216	11.9711	0.547241	0.00005
SLU7	Mock	ZIKV	18.4033	26.8932	0.547277	0.00005
NAB2	Mock	ZIKV	15.8656	23.1853	0.547309	0.00005
ZCCHC14	Mock	ZIKV	16.8048	24.5605	0.547469	0.00005
KPNA5	Mock	ZIKV	11.9621	17.4829	0.547477	0.00005
RASGEF1B	Mock	ZIKV	9.80748	14.3368	0.547767	0.00005
PELI2	Mock	ZIKV	8.43008	12.325	0.547968	0.00005
ZNF292	Mock	ZIKV	18.7945	27.4805	0.548099	0.00005
FARSA	Mock	ZIKV	20.7517	30.3432	0.548142	0.00005
DSEL	Mock	ZIKV	2.04535	2.99087	0.54822	0.00005
PHF23	Mock	ZIKV	20.1926	29.5316	0.54843	0.00005
ATP6V1E1	Mock	ZIKV	40.1198	58.7478	0.550221	0.00005
BRMS1L	Mock	ZIKV	7.85022	11.4981	0.550585	0.00005
MRPS31P5	Mock	ZIKV	10.3763	15.2042	0.55117	0.00005
EHBP1L1	Mock	ZIKV	2.30523	3.37899	0.551678	0.00005
ABL2	Mock	ZIKV	7.6315	11.1913	0.552334	0.00005
SUPT6H	Mock	ZIKV	27.6518	40.5532	0.552443	0.00005
CASP3	Mock	ZIKV	35.0784	51.4667	0.553057	0.00005
PAN3	Mock	ZIKV	16.2472	23.8532	0.553995	0.00005
RIOK1	Mock	ZIKV	7.66548	11.2541	0.554001	0.00005
MIER3	Mock	ZIKV	13.7104	20.135	0.554442	0.00005
PPP1R12C	Mock	ZIKV	25.8392	37.9475	0.554444	0.00005
PDE12	Mock	ZIKV	6.024	8.85255	0.555371	0.00005
PKIB	Mock	ZIKV	12.6658	18.6146	0.555498	0.00005
FADD	Mock	ZIKV	8.30034	12.2002	0.555661	0.00005
TMEFF2	Mock	ZIKV	7.93353	11.6637	0.555996	0.00005
CCNT1	Mock	ZIKV	11.118	16.3467	0.556095	0.00005
TAB2	Mock	ZIKV	31.4056	46.1799	0.556242	0.00005
SUPT5H	Mock	ZIKV	41.8327	61.5629	0.557432	0.00005
TPPP	Mock	ZIKV	6.00398	8.83874	0.557922	0.00005
TRUB1	Mock	ZIKV	12.5041	18.4096	0.558055	0.00005
RAB3GAP1	Mock	ZIKV	15.2967	22.5281	0.558503	0.00005
SLC6A1	Mock	ZIKV	5.74485	8.46091	0.558544	0.00005
RIMKLA	Mock	ZIKV	1.06859	1.57392	0.558656	0.00005
HCN4	Mock	ZIKV	5.39275	7.94441	0.558918	0.00005
PRDM4	Mock	ZIKV	19.6265	28.92	0.559267	0.00005
GAPVD1	Mock	ZIKV	8.93734	13.1701	0.559349	0.00005
ZNF70	Mock	ZIKV	3.47064	5.11787	0.560342	0.00005
TMEM63C	Mock	ZIKV	5.23783	7.72463	0.560497	0.00005
ZNF148	Mock	ZIKV	6.14648	9.06683	0.560838	0.00005
ASB7	Mock	ZIKV	4.37474	6.45334	0.56085	0.00005
CD2AP	Mock	ZIKV	4.39639	6.48534	0.560865	0.00005
DIP2C	Mock	ZIKV	13.9067	20.5151	0.560907	0.00005
MPHOSPH10	Mock	ZIKV	12.9811	19.1586	0.56158	0.00005
DDX49	Mock	ZIKV	18.3613	27.1051	0.561902	0.00005
CXorf40B	Mock	ZIKV	12.6392	18.6627	0.56225	0.00005
RNF126	Mock	ZIKV	24.3419	35.956	0.562792	0.00005
CNST	Mock	ZIKV	5.42227	8.01192	0.563251	0.00005
SNAPC4	Mock	ZIKV	9.99343	14.7742	0.564025	0.00005
LOC150776	Mock	ZIKV	13.5148	19.9826	0.564206	0.00005
NEFL	Mock	ZIKV	48.7176	72.0468	0.564492	0.00005
GNAO1	Mock	ZIKV	8.54766	12.6411	0.56452	0.00005
DCP1A	Mock	ZIKV	14.4073	21.319	0.565341	0.00005
TYK2	Mock	ZIKV	8.57653	12.6917	0.565424	0.00005
NRBF2	Mock	ZIKV	9.35224	13.843	0.56577	0.00005
FAM76A	Mock	ZIKV	4.68225	6.93165	0.565994	0.00005
ZNF420	Mock	ZIKV	4.49161	6.65058	0.566245	0.00005
CPE	Mock	ZIKV	104.798	155.181	0.566331	0.00005
MYO9A	Mock	ZIKV	5.8317	8.63945	0.567023	0.00005
KIAA1715	Mock	ZIKV	12.2942	18.2153	0.567168	0.00005
BRD1	Mock	ZIKV	23.8756	35.379	0.567353	0.00005
ERRFI1	Mock	ZIKV	20.9931	31.108	0.567373	0.00005
HEXIM1	Mock	ZIKV	9.43278	13.9805	0.567662	0.00005
LONRF1	Mock	ZIKV	14.8243	21.9732	0.567787	0.00005
PCSK1N	Mock	ZIKV	53.3496	79.0999	0.568198	0.00005
SEC61B	Mock	ZIKV	95.7032	141.902	0.568255	0.00005
DMPK	Mock	ZIKV	38.8365	57.589	0.568381	0.00005
PLCL1	Mock	ZIKV	4.17793	6.19822	0.569066	0.00005
SETD8	Mock	ZIKV	19.3255	28.6741	0.569244	0.00005
PPP2R5B	Mock	ZIKV	19.6128	29.1019	0.569316	0.00005
BIRC2	Mock	ZIKV	20.0242	29.7163	0.569514	0.00005
TTC8	Mock	ZIKV	12.7398	18.9101	0.569812	0.00005
COL4A3BP	Mock	ZIKV	9.55571	14.1847	0.569896	0.00005
C9orf91	Mock	ZIKV	2.57783	3.82691	0.570021	0.00005
CCDC130	Mock	ZIKV	24.0371	35.6912	0.570309	0.00005
MIB2	Mock	ZIKV	18.9544	28.1474	0.570468	0.00005
CLP1	Mock	ZIKV	7.64353	11.3508	0.57048	0.00005
ADO	Mock	ZIKV	10.6941	15.8894	0.571253	0.00005
SNTB2	Mock	ZIKV	4.86624	7.23232	0.57165	0.00005
RUSC2	Mock	ZIKV	14.5859	21.6865	0.572227	0.00005
HEG1	Mock	ZIKV	2.20763	3.28293	0.572483	0.00005
FBXO31	Mock	ZIKV	6.89299	10.2511	0.572573	0.00005
MRPL1	Mock	ZIKV	12.7179	18.9187	0.572952	0.00005
TRIM4	Mock	ZIKV	3.10064	4.61268	0.57304	0.00005
SEC61G	Mock	ZIKV	111.144	165.354	0.573121	0.00005
BAIAP2	Mock	ZIKV	27.0185	40.1976	0.573163	0.00005
FNBP1	Mock	ZIKV	13.3729	19.8987	0.573364	0.00005
KAT2B	Mock	ZIKV	4.35616	6.48208	0.5734	0.00005
STK17A	Mock	ZIKV	6.35601	9.461	0.57387	0.00005
USP36	Mock	ZIKV	5.38439	8.01658	0.574202	0.00005
YIF1A	Mock	ZIKV	24.5598	36.5665	0.574223	0.00005
SRPK2	Mock	ZIKV	26.6384	39.6674	0.574446	0.00005
ELL2	Mock	ZIKV	3.82847	5.70204	0.574711	0.00005
SEC31A	Mock	ZIKV	47.8507	71.2762	0.57488	0.00005
NEK4	Mock	ZIKV	13.0448	19.4365	0.575291	0.00005
KAZN	Mock	ZIKV	7.70736	11.4878	0.575794	0.00005
SMCR8	Mock	ZIKV	5.77453	8.60757	0.575903	0.00005
RGL1	Mock	ZIKV	4.12309	6.14858	0.576528	0.00005
ARF1	Mock	ZIKV	137.058	204.402	0.576624	0.00005
TTBK2	Mock	ZIKV	9.33071	13.9172	0.576806	0.00005
NDUFV3	Mock	ZIKV	21.9989	32.8125	0.576813	0.00005
TBCCD1	Mock	ZIKV	5.34701	7.97616	0.576962	0.00005
TMED9	Mock	ZIKV	75.077	112.005	0.577121	0.00005
GIT2	Mock	ZIKV	9.50816	14.1914	0.577775	0.00005
RYBP	Mock	ZIKV	17.1158	25.5584	0.578471	0.00005
CEP57	Mock	ZIKV	31.237	46.648	0.57856	0.00005
FKBP4	Mock	ZIKV	32.2473	48.2251	0.580604	0.00005
SRFBP1	Mock	ZIKV	3.94697	5.90332	0.580782	0.00005
FIP1L1	Mock	ZIKV	26.1257	39.1048	0.581877	0.00005
ZNF253	Mock	ZIKV	13.6552	20.4409	0.582003	0.00005
C20orf111	Mock	ZIKV	15.1753	22.7219	0.58236	0.00005
MED10	Mock	ZIKV	22.057	33.0398	0.58297	0.00005
BCLAF1	Mock	ZIKV	47.7782	71.5717	0.583039	0.00005
UTP6	Mock	ZIKV	18.6729	27.9784	0.58337	0.00005
NELFA	Mock	ZIKV	21.7844	32.6414	0.58341	0.00005
ELP4	Mock	ZIKV	18.9828	28.4497	0.583723	0.00005
METTL22	Mock	ZIKV	13.5697	20.3411	0.584012	0.00005
SUCLA2	Mock	ZIKV	20.7037	31.0426	0.584365	0.00005
DYRK4	Mock	ZIKV	7.71619	11.5747	0.585013	0.00005
LNPEP	Mock	ZIKV	2.80191	4.20309	0.585038	0.00005
SEPT7P2	Mock	ZIKV	7.28079	10.9236	0.58528	0.00005
PLCB4	Mock	ZIKV	15.9886	23.9893	0.585352	0.00005
PIAS4	Mock	ZIKV	13.2487	19.8829	0.585673	0.00005
CNOT4	Mock	ZIKV	10.6435	15.9734	0.585695	0.00005
LMNA	Mock	ZIKV	34.1237	51.2353	0.586365	0.00005
TNFRSF10B	Mock	ZIKV	63.4428	95.2919	0.586897	0.00005
SYT14	Mock	ZIKV	3.07359	4.61729	0.587122	0.00005
RPS19BP1	Mock	ZIKV	37.1592	55.851	0.587864	0.00005
FYTTD1	Mock	ZIKV	26.6145	40.0023	0.58787	0.00005
PCSK9	Mock	ZIKV	2.2446	3.37453	0.588228	0.00005
DUSP6	Mock	ZIKV	27.0222	40.6452	0.588944	0.00005
DDRGK1	Mock	ZIKV	31.0146	46.6539	0.589051	0.00005
YY1AP1	Mock	ZIKV	23.1249	34.7911	0.589273	0.00005
NRP2	Mock	ZIKV	37.3661	56.2206	0.589369	0.00005
CEP290	Mock	ZIKV	11.9379	17.9626	0.589442	0.00005
CSNK1G1	Mock	ZIKV	5.7606	8.66803	0.589486	0.00005
FAM175B	Mock	ZIKV	8.03728	12.095	0.589628	0.00005
MRPS30	Mock	ZIKV	15.0029	22.5816	0.589903	0.00005
ANKRD50	Mock	ZIKV	12.1649	18.3114	0.590013	0.00005
OSTC	Mock	ZIKV	68.9333	103.779	0.590247	0.00005
CBLB	Mock	ZIKV	11.1051	16.7193	0.590293	0.00005
HPCAL4	Mock	ZIKV	3.82858	5.76476	0.590448	0.00005
ONECUT1	Mock	ZIKV	7.92496	11.9373	0.591001	0.00005
PHLPP2	Mock	ZIKV	6.90462	10.4047	0.591596	0.00005
BRD4	Mock	ZIKV	24.8814	37.4941	0.591599	0.00005
COMMD10	Mock	ZIKV	16.7917	25.3052	0.591683	0.00005
IFFO2	Mock	ZIKV	3.5392	5.33444	0.591915	0.00005
LINS	Mock	ZIKV	3.89901	5.87818	0.592262	0.00005
MAP7D1	Mock	ZIKV	52.7505	79.5459	0.592601	0.00005
MED13L	Mock	ZIKV	19.396	29.2539	0.59287	0.00005
ATP6V1G1	Mock	ZIKV	91.8608	138.556	0.592944	0.00005
GOLPH3L	Mock	ZIKV	5.29188	7.98202	0.592972	0.00005
PCDH19	Mock	ZIKV	7.60825	11.4793	0.593399	0.00005
SHANK1	Mock	ZIKV	5.31392	8.01841	0.593539	0.00005
FAM135A	Mock	ZIKV	8.39802	12.6753	0.593902	0.00005
CIR1	Mock	ZIKV	17.3728	26.2454	0.595238	0.00005
CAMK4	Mock	ZIKV	5.8473	8.83719	0.595816	0.00005
DCAF10	Mock	ZIKV	7.5593	11.4269	0.596111	0.00005
USO1	Mock	ZIKV	26.6112	40.2286	0.59619	0.00005
LRRC16B	Mock	ZIKV	8.69075	13.1416	0.596589	0.00005
BCAS2	Mock	ZIKV	33.9262	51.3059	0.596726	0.00005
PCDH17	Mock	ZIKV	11.9904	18.1339	0.596816	0.00005
SLC22A15	Mock	ZIKV	2.85838	4.32375	0.597085	0.00005
TMTC3	Mock	ZIKV	5.64062	8.5349	0.597521	0.00005
TOR1AIP2	Mock	ZIKV	8.63161	13.0607	0.597533	0.00005
NBEAL1	Mock	ZIKV	1.88397	2.85069	0.597534	0.00005
ABTB2	Mock	ZIKV	10.9237	16.5335	0.597926	0.00005
H3F3B	Mock	ZIKV	331.163	501.34	0.598247	0.00005
FEM1C	Mock	ZIKV	8.1525	12.3427	0.59834	0.00005
RYR2	Mock	ZIKV	0.989781	1.49864	0.598468	0.00005
ENOPH1	Mock	ZIKV	24.7104	37.4181	0.59862	0.00005
DENND4B	Mock	ZIKV	15.99	24.214	0.598666	0.00005
UTP15	Mock	ZIKV	3.22205	4.88213	0.599529	0.00005
LOC493754	Mock	ZIKV	6.04764	9.16468	0.599712	0.00005
TOPORS	Mock	ZIKV	7.07135	10.7167	0.599802	0.00005
SCG2	Mock	ZIKV	60.6945	91.984	0.599817	0.00005
FOXK2	Mock	ZIKV	22.6044	34.2717	0.60041	0.00005
MECP2	Mock	ZIKV	15.6728	23.7713	0.600962	0.00005
CLPX	Mock	ZIKV	14.8508	22.5348	0.601612	0.00005
CNEP1R1	Mock	ZIKV	6.90273	10.4759	0.601829	0.00005
ARHGEF1	Mock	ZIKV	7.22537	10.9659	0.601876	0.00005
MKLN1	Mock	ZIKV	11.4755	17.4194	0.602141	0.00005
EML2	Mock	ZIKV	5.26253	7.99104	0.602626	0.00005
TMEM64	Mock	ZIKV	5.15335	7.82783	0.603103	0.00005
RRM2B	Mock	ZIKV	14.124	21.4546	0.603133	0.00005
CGRRF1	Mock	ZIKV	11.2646	17.1116	0.603181	0.00005
UHRF1BP1L	Mock	ZIKV	7.46922	11.3476	0.603353	0.00005
RBM18	Mock	ZIKV	11.4207	17.3518	0.603438	0.00005
KLHL36	Mock	ZIKV	6.78436	10.3129	0.604159	0.00005
ATP6V1B2	Mock	ZIKV	49.4171	75.1204	0.604194	0.00005
BCL11A	Mock	ZIKV	8.97897	13.6583	0.605159	0.00005
KIF5B	Mock	ZIKV	63.0246	95.9465	0.606316	0.00005
MKNK2	Mock	ZIKV	35.1344	53.4939	0.60649	0.00005
RASA2	Mock	ZIKV	8.20278	12.4897	0.60656	0.00005
ZNF584	Mock	ZIKV	6.40695	9.75982	0.607218	0.00005
PIKFYVE	Mock	ZIKV	14.5027	22.094	0.607332	0.00005
TECTA	Mock	ZIKV	1.94031	2.956	0.60736	0.00005
MRPS18B	Mock	ZIKV	18.4218	28.0689	0.607555	0.00005
CLIC4	Mock	ZIKV	45.796	69.7892	0.607781	0.00005
TYW5	Mock	ZIKV	4.05406	6.17908	0.608024	0.00005
KCNT2	Mock	ZIKV	8.35	12.7287	0.608242	0.00005
SLC38A1	Mock	ZIKV	41.6439	63.5223	0.609158	0.00005
KCTD1	Mock	ZIKV	10.1842	15.5394	0.609599	0.00005
TOLLIP	Mock	ZIKV	9.92389	15.1503	0.610373	0.00005
TRA2A	Mock	ZIKV	75.8316	115.789	0.610633	0.00005
FSTL5	Mock	ZIKV	20.8767	31.8782	0.610676	0.00005
GLIS2	Mock	ZIKV	12.6172	19.2707	0.611018	0.00005
ZNF213	Mock	ZIKV	7.78988	11.8988	0.611148	0.00005
AKIRIN2	Mock	ZIKV	35.5631	54.3488	0.611868	0.00005
ADRBK1	Mock	ZIKV	26.7052	40.8191	0.612125	0.00005
OSBPL2	Mock	ZIKV	18.0754	27.6363	0.612537	0.00005
LATS1	Mock	ZIKV	12.8676	19.6993	0.614396	0.00005
RUNDC1	Mock	ZIKV	9.31485	14.2684	0.615221	0.00005
RRP8	Mock	ZIKV	6.82613	10.4563	0.615234	0.00005
ELOVL4	Mock	ZIKV	8.55446	13.1105	0.615978	0.00005
COPE	Mock	ZIKV	74.6035	114.414	0.616948	0.00005
GIGYF2	Mock	ZIKV	16.0065	24.5678	0.618111	0.00005
MN1	Mock	ZIKV	20.4764	31.4429	0.618772	0.00005
ARHGAP26	Mock	ZIKV	1.16259	1.78686	0.620082	0.00005
ROCK2	Mock	ZIKV	14.6105	22.4637	0.620593	0.00005
CPEB2	Mock	ZIKV	7.34025	11.2864	0.62068	0.00005
DNM3	Mock	ZIKV	3.05924	4.70559	0.621204	0.00005
TBC1D15	Mock	ZIKV	8.13063	12.5093	0.621564	0.00005
THUMPD2	Mock	ZIKV	6.82729	10.5065	0.621901	0.00005
EIF1B	Mock	ZIKV	129.263	198.925	0.621921	0.00005
TMEM41B	Mock	ZIKV	16.5104	25.4109	0.622069	0.00005
NOP58	Mock	ZIKV	37.6609	57.9687	0.622208	0.00005
SDAD1	Mock	ZIKV	12.0053	18.5022	0.624024	0.00005
LIN54	Mock	ZIKV	5.09414	7.85094	0.624025	0.00005
PPM1K	Mock	ZIKV	5.52567	8.51744	0.624271	0.00005
TMEM128	Mock	ZIKV	15.5781	24.0128	0.624284	0.00005
ZNF622	Mock	ZIKV	9.43305	14.5416	0.624394	0.00005
TNRC6C	Mock	ZIKV	12.4069	19.1321	0.624854	0.00005
RC3H2	Mock	ZIKV	15.6173	24.1031	0.626079	0.00005
CCDC9	Mock	ZIKV	7.11762	10.9878	0.62643	0.00005
NEURL	Mock	ZIKV	3.3325	5.1462	0.626905	0.00005
MED15	Mock	ZIKV	20.1706	31.1512	0.627038	0.00005
CCDC6	Mock	ZIKV	10.9942	16.9858	0.62758	0.00005
ATP6V1H	Mock	ZIKV	25.1345	38.8558	0.628458	0.00005
ZZZ3	Mock	ZIKV	13.7342	21.2338	0.628586	0.00005
FBXO42	Mock	ZIKV	11.9596	18.4975	0.629167	0.00005
DYRK1A	Mock	ZIKV	23.5842	36.4772	0.629175	0.00005
DUSP4	Mock	ZIKV	14.0139	21.6762	0.629251	0.00005
FBXO45	Mock	ZIKV	5.15558	7.97752	0.629805	0.00005
ZCCHC2	Mock	ZIKV	4.88553	7.56178	0.630213	0.00005
POLR3D	Mock	ZIKV	11.3579	17.5809	0.630311	0.00005
FRS2	Mock	ZIKV	10.0816	15.6105	0.630794	0.00005
USP32	Mock	ZIKV	9.75053	15.0988	0.630881	0.00005
FBXL20	Mock	ZIKV	6.61015	10.2379	0.631162	0.00005
FBXL3	Mock	ZIKV	8.39069	12.9989	0.631531	0.00005
YTHDF1	Mock	ZIKV	24.8807	38.5591	0.632045	0.00005
CLCN6	Mock	ZIKV	19.0206	29.4828	0.632311	0.00005
RBM20	Mock	ZIKV	1.01975	1.58117	0.632771	0.00005
MAP9	Mock	ZIKV	9.67714	15.0054	0.632825	0.00005
CHD1	Mock	ZIKV	22.7817	35.3255	0.632837	0.00005
LARP1B	Mock	ZIKV	11.6368	18.0517	0.633447	0.00005
AFTPH	Mock	ZIKV	11.2537	17.4628	0.63388	0.00005
CDK17	Mock	ZIKV	13.7532	21.3467	0.634252	0.00005
RSBN1L	Mock	ZIKV	10.9813	17.0468	0.634456	0.00005
ASCL1	Mock	ZIKV	16.2743	25.2744	0.635083	0.00005
BEND3P3	Mock	ZIKV	4.69976	7.29968	0.635244	0.00005
MBIP	Mock	ZIKV	11.6225	18.0534	0.63535	0.00005
TBC1D12	Mock	ZIKV	4.14623	6.44319	0.635975	0.00005
CLK3	Mock	ZIKV	16.8707	26.2265	0.636501	0.00005
HOMER1	Mock	ZIKV	4.81725	7.48871	0.636506	0.00005
HDAC5	Mock	ZIKV	28.1726	43.7966	0.636528	0.00005
CEBPG	Mock	ZIKV	27.9947	43.526	0.636723	0.00005
BCL2L13	Mock	ZIKV	14.3426	22.3003	0.636764	0.00005
GCC2	Mock	ZIKV	7.08789	11.025	0.637354	0.00005
NDUFAF2	Mock	ZIKV	17.9309	27.8917	0.63739	0.00005
NDEL1	Mock	ZIKV	9.47782	14.7436	0.637459	0.00005
RHBDD3	Mock	ZIKV	15.0404	23.3979	0.637532	0.00005
RCHY1	Mock	ZIKV	7.30319	11.3624	0.637666	0.00005
CECR2	Mock	ZIKV	20.8232	32.4102	0.638256	0.00005
TMEM241	Mock	ZIKV	2.43222	3.78777	0.639072	0.00005
ECD	Mock	ZIKV	9.48591	14.7779	0.639585	0.00005
ZNF627	Mock	ZIKV	14.262	22.2194	0.639637	0.00005
C10orf12	Mock	ZIKV	3.63652	5.66858	0.640427	0.00005
PGM3	Mock	ZIKV	12.2458	19.0886	0.640428	0.00005
YAF2	Mock	ZIKV	6.87635	10.7197	0.640551	0.00005
AGAP6	Mock	ZIKV	9.93926	15.4954	0.640632	0.00005
UGCG	Mock	ZIKV	8.94272	13.9441	0.64087	0.00005
RAB12	Mock	ZIKV	17.1185	26.6949	0.641013	0.00005
ST6GALNAC4	Mock	ZIKV	6.68588	10.4306	0.641629	0.00005
FBXO25	Mock	ZIKV	6.17089	9.62875	0.64187	0.00005
LIPG	Mock	ZIKV	28.308	44.1714	0.6419	0.00005
LRCH2	Mock	ZIKV	13.1517	20.53	0.642488	0.00005
TBC1D17	Mock	ZIKV	15.1161	23.6016	0.642793	0.00005
ITSN2	Mock	ZIKV	3.11969	4.87199	0.643109	0.00005
PTPN23	Mock	ZIKV	15.7907	24.6614	0.643181	0.00005
FBXW7	Mock	ZIKV	19.9544	31.1717	0.643533	0.00005
PLAG1	Mock	ZIKV	6.0797	9.50548	0.644759	0.00005
PIK3CA	Mock	ZIKV	10.9726	17.1555	0.644767	0.00005
RAB3C	Mock	ZIKV	11.9889	18.7473	0.644981	0.00005
EFNA3	Mock	ZIKV	13.5475	21.1902	0.645366	0.00005
ACSS2	Mock	ZIKV	16.4748	25.7777	0.64586	0.00005
USPL1	Mock	ZIKV	10.138	15.8753	0.647008	0.00005
KIF1A	Mock	ZIKV	87.9412	137.712	0.647038	0.00005
SIK2	Mock	ZIKV	11.2898	17.6802	0.647113	0.00005
PDPK1	Mock	ZIKV	16.7952	26.3066	0.647375	0.00005
CCSER1	Mock	ZIKV	3.89136	6.09767	0.647983	0.00005
HSD17B12	Mock	ZIKV	34.0044	53.286	0.648036	0.00005
PRMT10	Mock	ZIKV	5.01831	7.86634	0.648491	0.00005
ZNF205	Mock	ZIKV	10.5839	16.5922	0.648632	0.00005
EPRS	Mock	ZIKV	25.7723	40.4198	0.649239	0.00005
ST8SIA3	Mock	ZIKV	1.7195	2.69733	0.649538	0.00005
SYNGR3	Mock	ZIKV	11.0551	17.3445	0.649764	0.00005
ZNF436	Mock	ZIKV	4.05606	6.36433	0.649931	0.00005
AP3D1	Mock	ZIKV	43.8871	68.8685	0.650047	0.00005
GORASP2	Mock	ZIKV	30.4287	47.7604	0.650384	0.00005
SLC17A5	Mock	ZIKV	2.46571	3.87092	0.650675	0.00005
LOC728730	Mock	ZIKV	3.42946	5.38596	0.651221	0.00005
PAR-SN,SNORD107	Mock	ZIKV	8.2871	13.0201	0.651802	0.00005
TEF	Mock	ZIKV	4.88457	7.6784	0.652574	0.00005
ZBTB48	Mock	ZIKV	8.35991	13.1448	0.652939	0.00005
SHOC2	Mock	ZIKV	15.5509	24.4554	0.653155	0.00005
CREG2	Mock	ZIKV	3.45803	5.44075	0.653856	0.00005
DMWD	Mock	ZIKV	27.2765	42.9242	0.654132	0.00005
CUL3	Mock	ZIKV	17.5041	27.5486	0.654283	0.00005
TCEA1	Mock	ZIKV	58.5409	92.1375	0.654342	0.00005
RAPH1	Mock	ZIKV	8.32078	13.098	0.654553	0.00005
KSR2	Mock	ZIKV	0.889426	1.40014	0.654627	0.00005
MRGBP	Mock	ZIKV	22.2025	34.9517	0.654645	0.00005
GORAB	Mock	ZIKV	7.83627	12.3387	0.654948	0.00005
ZMYM5	Mock	ZIKV	8.5133	13.4059	0.655081	0.00005
KBTBD6	Mock	ZIKV	8.30167	13.0732	0.655136	0.00005
FOXJ3	Mock	ZIKV	20.563	32.3821	0.65515	0.00005
FOXO3	Mock	ZIKV	6.60778	10.4058	0.655154	0.00005
EVI5L	Mock	ZIKV	13.4564	21.1927	0.655278	0.00005
ZNF44	Mock	ZIKV	3.61639	5.69556	0.655287	0.00005
ERCC2	Mock	ZIKV	22.316	35.1642	0.656031	0.00005
STRIP1	Mock	ZIKV	26.3369	41.5062	0.656242	0.00005
DNAJC6	Mock	ZIKV	4.50072	7.09578	0.656806	0.00005
SRP68	Mock	ZIKV	24.4678	38.5806	0.656991	0.00005
TMED2	Mock	ZIKV	70.0646	110.494	0.65721	0.00005
MYLIP	Mock	ZIKV	7.66191	12.084	0.657328	0.00005
TNKS2	Mock	ZIKV	24.3899	38.5138	0.65909	0.00005
IKZF5	Mock	ZIKV	7.24566	11.4441	0.659421	0.00005
ZHX2	Mock	ZIKV	5.01089	7.91487	0.6595	0.00005
ZNF398	Mock	ZIKV	6.62319	10.471	0.660796	0.00005
TP53	Mock	ZIKV	27.3951	43.3165	0.660998	0.00005
SART1	Mock	ZIKV	19.548	30.9089	0.661003	0.00005
RNF6	Mock	ZIKV	6.36594	10.0663	0.661084	0.00005
FXR2	Mock	ZIKV	30.7222	48.5801	0.661086	0.00005
PAWR	Mock	ZIKV	11.6976	18.4989	0.661226	0.00005
IMPA1	Mock	ZIKV	7.82849	12.3831	0.661567	0.00005
TFE3	Mock	ZIKV	13.0461	20.6465	0.662282	0.00005
UNC5B	Mock	ZIKV	26.0606	41.2536	0.662652	0.00005
NHLRC2	Mock	ZIKV	7.14537	11.3116	0.662727	0.00005
C1orf50	Mock	ZIKV	13.837	21.911	0.663127	0.00005
GPATCH2	Mock	ZIKV	7.27372	11.5208	0.663476	0.00005
ZNF333	Mock	ZIKV	8.78747	13.9216	0.663808	0.00005
SERINC1	Mock	ZIKV	137.662	218.096	0.663837	0.00005
YPEL2	Mock	ZIKV	3.24549	5.14322	0.664237	0.00005
CHMP2B	Mock	ZIKV	8.86354	14.0516	0.664777	0.00005
OTUD4	Mock	ZIKV	10.359	16.4284	0.665302	0.00005
PEG3	Mock	ZIKV	78.4296	124.408	0.66561	0.00005
ANKRA2	Mock	ZIKV	9.2263	14.6354	0.665635	0.00005
ANKRD12	Mock	ZIKV	11.1272	17.6513	0.66568	0.00005
DHX29	Mock	ZIKV	11.3452	17.998	0.665749	0.00005
KLHDC8B	Mock	ZIKV	43.7013	69.3447	0.66611	0.00005
PATL1	Mock	ZIKV	11.9283	18.929	0.666212	0.00005
PAIP2B	Mock	ZIKV	3.66115	5.81115	0.666528	0.00005
BACH2	Mock	ZIKV	8.87208	14.0831	0.666625	0.00005
ZNF791	Mock	ZIKV	8.54238	13.5664	0.667324	0.00005
PMEPA1	Mock	ZIKV	6.12112	9.72182	0.667432	0.00005
ZNF134	Mock	ZIKV	13.8732	22.0346	0.667467	0.00005
ZNF652	Mock	ZIKV	5.5278	8.78066	0.667624	0.00005
ARHGAP5	Mock	ZIKV	15.8388	25.1593	0.66763	0.00005
HSD17B7	Mock	ZIKV	10.5042	16.6856	0.66763	0.00005
SRGAP1	Mock	ZIKV	4.65611	7.39618	0.667654	0.00005
EAPP	Mock	ZIKV	22.0019	34.9599	0.668071	0.00005
AFF4	Mock	ZIKV	31.284	49.7401	0.668983	0.00005
RAD17	Mock	ZIKV	13.326	21.1914	0.669232	0.00005
SIN3B	Mock	ZIKV	17.8181	28.3433	0.669663	0.00005
ZNF568	Mock	ZIKV	4.66692	7.42453	0.66983	0.00005
C3orf33	Mock	ZIKV	4.03817	6.42697	0.670437	0.00005
APBA1	Mock	ZIKV	4.58563	7.29849	0.670478	0.00005
NYAP1	Mock	ZIKV	20.0714	31.9464	0.670511	0.00005
SECISBP2L	Mock	ZIKV	16.7629	26.6849	0.670753	0.00005
TGIF1	Mock	ZIKV	18.09	28.8082	0.671286	0.00005
C1orf35	Mock	ZIKV	19.3924	30.8827	0.671309	0.00005
THAP8	Mock	ZIKV	4.2553	6.77855	0.671717	0.00005
GKAP1	Mock	ZIKV	11.9964	19.1171	0.672259	0.00005
CHD9	Mock	ZIKV	12.5158	19.949	0.672569	0.00005
C9orf172	Mock	ZIKV	2.67293	4.2606	0.672635	0.00005
GBF1	Mock	ZIKV	24.6403	39.3034	0.673636	0.00005
CSNK1A1	Mock	ZIKV	74.0454	118.132	0.673918	0.00005
FLRT1	Mock	ZIKV	5.45993	8.71487	0.674597	0.00005
PCDH9	Mock	ZIKV	9.07843	14.4908	0.674625	0.00005
RBM27	Mock	ZIKV	9.30818	14.8625	0.675106	0.00005
SHB	Mock	ZIKV	5.28755	8.44775	0.675969	0.00005
IRF2BPL	Mock	ZIKV	27.1249	43.3369	0.67598	0.00005
PDXK	Mock	ZIKV	7.04481	11.2633	0.677	0.00005
GYG1	Mock	ZIKV	11.3309	18.1187	0.677221	0.00005
STMN4	Mock	ZIKV	87.6254	140.164	0.67769	0.00005
IRF2BP2	Mock	ZIKV	20.7316	33.1637	0.677771	0.00005
DUSP11	Mock	ZIKV	8.15737	13.05	0.677875	0.00005
ZNF329	Mock	ZIKV	6.90995	11.0622	0.678888	0.00005
CNTNAP1	Mock	ZIKV	6.01876	9.63663	0.679062	0.00005
TBK1	Mock	ZIKV	6.45123	10.332	0.679478	0.00005
MSTO1	Mock	ZIKV	5.34006	8.55529	0.679961	0.00005
MAFG	Mock	ZIKV	9.47147	15.1746	0.679996	0.00005
FOXN2	Mock	ZIKV	6.68197	10.7067	0.680162	0.00005
FECH	Mock	ZIKV	1.38178	2.2142	0.680256	0.00005
CRIM1	Mock	ZIKV	9.84587	15.7775	0.680276	0.00005
ZNF211	Mock	ZIKV	11.5972	18.5951	0.681143	0.00005
LRSAM1	Mock	ZIKV	9.5896	15.3786	0.681384	0.00005
POLH	Mock	ZIKV	4.89605	7.85366	0.681745	0.00005
SNX27	Mock	ZIKV	9.13689	14.6666	0.682757	0.00005
NARS	Mock	ZIKV	53.8252	86.4009	0.682765	0.00005
NALCN	Mock	ZIKV	1.51309	2.42905	0.682892	0.00005
PREB	Mock	ZIKV	17.0679	27.4078	0.683301	0.00005
UBALD1	Mock	ZIKV	13.6858	21.9815	0.683611	0.00005
XRN1	Mock	ZIKV	10.3507	16.6295	0.68402	0.00005
IRF7	Mock	ZIKV	6.33666	10.1876	0.685015	0.00005
PIK3C2A	Mock	ZIKV	18.0925	29.0952	0.685386	0.00005
MVK	Mock	ZIKV	14.1855	22.8233	0.686091	0.00005
REV3L	Mock	ZIKV	12.1023	19.4778	0.68655	0.00005
JAZF1	Mock	ZIKV	8.92032	14.3605	0.686938	0.00005
FAM160A2	Mock	ZIKV	9.46246	15.2443	0.687983	0.00005
PPFIA3	Mock	ZIKV	9.08391	14.639	0.688431	0.00005
SSFA2	Mock	ZIKV	11.1483	17.9747	0.689146	0.00005
MAP4K3	Mock	ZIKV	18.0719	29.1623	0.690355	0.00005
CAMTA2	Mock	ZIKV	6.15395	9.9327	0.690673	0.00005
ZNF626	Mock	ZIKV	8.67293	13.9996	0.690798	0.00005
ZNF746	Mock	ZIKV	7.8141	12.6142	0.690902	0.00005
RAB22A	Mock	ZIKV	5.31957	8.58928	0.69123	0.00005
CC2D1A	Mock	ZIKV	7.42037	11.9822	0.691327	0.00005
WDR37	Mock	ZIKV	10.5733	17.0745	0.691417	0.00005
EPB41L4A-AS1	Mock	ZIKV	21.822	35.24	0.691428	0.00005
RP9	Mock	ZIKV	13.419	21.6832	0.692298	0.00005
RAB9A	Mock	ZIKV	9.26228	14.972	0.692833	0.00005
SPRYD3	Mock	ZIKV	4.28087	6.92318	0.693531	0.00005
PCDH1	Mock	ZIKV	4.19158	6.77954	0.693694	0.00005
NECAP1	Mock	ZIKV	17.1509	27.7444	0.693909	0.00005
FAM63B	Mock	ZIKV	10.8842	17.6137	0.694464	0.00005
SNAP91	Mock	ZIKV	16.5823	26.8436	0.694934	0.00005
SCD	Mock	ZIKV	409.488	663.578	0.696443	0.00005
SBDS	Mock	ZIKV	26.5422	43.0121	0.696456	0.00005
TUBG2	Mock	ZIKV	8.69592	14.0989	0.697168	0.00005
PPP1R13B	Mock	ZIKV	2.46538	3.99898	0.697821	0.00005
FTSJD1	Mock	ZIKV	9.56523	15.5179	0.698058	0.00005
GCC1	Mock	ZIKV	5.83155	9.46678	0.698994	0.00005
SERTAD3	Mock	ZIKV	12.3639	20.0758	0.699316	0.00005
CNNM2	Mock	ZIKV	5.4501	8.85037	0.699454	0.00005
IPMK	Mock	ZIKV	4.58854	7.45424	0.700025	0.00005
ZNF865	Mock	ZIKV	5.93222	9.63715	0.700036	0.00005
PXK	Mock	ZIKV	8.37201	13.6217	0.702261	0.00005
FAIM2	Mock	ZIKV	3.32949	5.4181	0.702484	0.00005
VWA5A	Mock	ZIKV	13.9784	22.748	0.702541	0.00005
GTF2A1	Mock	ZIKV	12.6331	20.5621	0.702785	0.00005
SOWAHC	Mock	ZIKV	5.37417	8.74939	0.70314	0.00005
RBM33	Mock	ZIKV	18.7547	30.5365	0.703286	0.00005
COPA	Mock	ZIKV	45.9701	74.91	0.704463	0.00005
SLC6A9	Mock	ZIKV	6.89097	11.233	0.704969	0.00005
OTUD7B	Mock	ZIKV	4.60812	7.51725	0.706028	0.00005
TRIM35	Mock	ZIKV	6.04492	9.86167	0.706109	0.00005
LRP1B	Mock	ZIKV	1.0612	1.73133	0.706183	0.00005
NAA30	Mock	ZIKV	7.27015	11.8642	0.70656	0.00005
ATXN3	Mock	ZIKV	6.13234	10.0094	0.706851	0.00005
IDE	Mock	ZIKV	6.81234	11.1203	0.706975	0.00005
ZNF451	Mock	ZIKV	18.5234	30.242	0.707203	0.00005
FAM122A	Mock	ZIKV	4.19264	6.84638	0.707483	0.00005
UAP1	Mock	ZIKV	13.6649	22.3237	0.708099	0.00005
USP27X	Mock	ZIKV	4.78164	7.81353	0.708468	0.00005
PJA2	Mock	ZIKV	57.6649	94.2461	0.70874	0.00005
RLF	Mock	ZIKV	9.82807	16.0638	0.708835	0.00005
SOCS7	Mock	ZIKV	14.4057	23.547	0.7089	0.00005
HECA	Mock	ZIKV	7.61492	12.4491	0.709139	0.00005
ZNF274	Mock	ZIKV	11.2201	18.3444	0.709253	0.00005
ZNF775	Mock	ZIKV	8.66613	14.1699	0.709372	0.00005
TSTA3	Mock	ZIKV	13.9901	22.8898	0.710294	0.00005
PRRC1	Mock	ZIKV	17.0014	27.8215	0.710543	0.00005
SGMS1	Mock	ZIKV	3.52479	5.77334	0.711867	0.00005
GAS7	Mock	ZIKV	1.96081	3.21168	0.711877	0.00005
CBS	Mock	ZIKV	26.2273	42.9608	0.711952	0.00005
KCTD5	Mock	ZIKV	19.6973	32.2702	0.712202	0.00005
TERF2	Mock	ZIKV	11.0003	18.0288	0.712765	0.00005
FAM204A	Mock	ZIKV	16.049	26.3119	0.713231	0.00005
ABHD5	Mock	ZIKV	3.07876	5.05042	0.714052	0.00005
LARP4B	Mock	ZIKV	8.03381	13.1798	0.714167	0.00005
PGGT1B	Mock	ZIKV	7.17223	11.7767	0.715437	0.00005
KPNA4	Mock	ZIKV	12.6635	20.7971	0.715712	0.00005
ADK	Mock	ZIKV	11.7757	19.346	0.716222	0.00005
SSBP2	Mock	ZIKV	17.6798	29.0475	0.716315	0.00005
BCAS4	Mock	ZIKV	6.26927	10.3077	0.717351	0.00005
BAG4	Mock	ZIKV	4.06069	6.67688	0.717447	0.00005
DPF2	Mock	ZIKV	35.3695	58.1942	0.718369	0.00005
SAMD8	Mock	ZIKV	11.8754	19.5454	0.718856	0.00005
CCPG1	Mock	ZIKV	9.87746	16.2615	0.719248	0.00005
RNF115	Mock	ZIKV	10.5413	17.3664	0.720241	0.00005
ZNF518B	Mock	ZIKV	6.70549	11.0483	0.720411	0.00005
NFKBIA	Mock	ZIKV	12.0907	19.923	0.720542	0.00005
ZBTB8A	Mock	ZIKV	4.24027	6.98721	0.720561	0.00005
YTHDC1	Mock	ZIKV	24.2908	40.0641	0.721896	0.00005
USP15	Mock	ZIKV	7.13407	11.7724	0.722615	0.00005
TMEM38B	Mock	ZIKV	9.57284	15.8029	0.72317	0.00005
RNF138	Mock	ZIKV	18.9866	31.3529	0.723613	0.00005
DUSP7	Mock	ZIKV	4.33673	7.16444	0.724246	0.00005
AFF3	Mock	ZIKV	9.32985	15.425	0.725344	0.00005
RFK	Mock	ZIKV	14.2189	23.5094	0.725432	0.00005
UIMC1	Mock	ZIKV	12.4828	20.6398	0.725483	0.00005
ZNF284	Mock	ZIKV	1.88337	3.11488	0.725862	0.00005
ABHD4	Mock	ZIKV	8.13027	13.4474	0.725948	0.00005
P4HB	Mock	ZIKV	128.302	212.215	0.725979	0.00005
ZNF256	Mock	ZIKV	5.29532	8.76507	0.727047	0.00005
C12orf5	Mock	ZIKV	4.32851	7.1651	0.727116	0.00005
RUFY1	Mock	ZIKV	20.709	34.2848	0.727306	0.00005
ETV3	Mock	ZIKV	6.28768	10.41	0.72737	0.00005
PPP3CC	Mock	ZIKV	4.15251	6.87543	0.727467	0.00005
GOT1	Mock	ZIKV	21.4687	35.5547	0.727807	0.00005
JAK2	Mock	ZIKV	1.96919	3.26148	0.727928	0.00005
SNPH	Mock	ZIKV	2.35592	3.90221	0.728	0.00005
GATAD2B	Mock	ZIKV	13.2537	21.9558	0.728212	0.00005
SLC2A13	Mock	ZIKV	1.85537	3.07366	0.728252	0.00005
HSP90B1	Mock	ZIKV	217.074	359.778	0.728919	0.00005
RAB6A	Mock	ZIKV	47.3376	78.5037	0.729774	0.00005
SNCA	Mock	ZIKV	5.67844	9.42065	0.730332	0.00005
CAMKMT	Mock	ZIKV	4.36235	7.23744	0.730373	0.00005
PPP2R5A	Mock	ZIKV	2.40042	3.98402	0.730936	0.00005
CDKN1B	Mock	ZIKV	37.6029	62.4105	0.730946	0.00005
UBN2	Mock	ZIKV	9.70415	16.1089	0.731183	0.00005
DACT1	Mock	ZIKV	5.55745	9.22686	0.731418	0.00005
KCNG1	Mock	ZIKV	3.06354	5.08743	0.731738	0.00005
ARRDC3	Mock	ZIKV	39.4348	65.4926	0.731863	0.00005
MED12L	Mock	ZIKV	2.31482	3.84457	0.731926	0.00005
OPTN	Mock	ZIKV	16.4555	27.3305	0.731939	0.00005
RILPL1	Mock	ZIKV	6.2431	10.3691	0.731953	0.00005
SAV1	Mock	ZIKV	6.64699	11.0473	0.732919	0.00005
TBC1D10A	Mock	ZIKV	2.65115	4.4085	0.733668	0.00005
BCL9L	Mock	ZIKV	8.66984	14.4255	0.734547	0.00005
RSL24D1	Mock	ZIKV	73.049	121.605	0.735263	0.00005
TXNL1	Mock	ZIKV	46.8301	77.9735	0.735547	0.00005
PLEKHM3	Mock	ZIKV	4.66806	7.77446	0.73592	0.00005
TRIP10	Mock	ZIKV	7.56667	12.6023	0.735956	0.00005
PLCB1	Mock	ZIKV	5.20889	8.67568	0.736	0.00005
ZNF841	Mock	ZIKV	6.07773	10.1248	0.736291	0.00005
DOCK6	Mock	ZIKV	4.22403	7.0377	0.736484	0.00005
KIAA2022	Mock	ZIKV	2.70024	4.5017	0.737383	0.00005
MARS2	Mock	ZIKV	2.38275	3.97469	0.738213	0.00005
STAT3	Mock	ZIKV	19.9227	33.2363	0.738347	0.00005
GTF2IRD1	Mock	ZIKV	21.1698	35.3335	0.73903	0.00005
TRIP11	Mock	ZIKV	6.17487	10.3107	0.739657	0.00005
TERF2IP	Mock	ZIKV	116.294	194.199	0.739758	0.00005
SMARCA2	Mock	ZIKV	4.06855	6.7974	0.740467	0.00005
LONP1	Mock	ZIKV	25.2291	42.1578	0.740711	0.00005
FGFR2	Mock	ZIKV	6.28954	10.5191	0.741982	0.00005
SEC23A	Mock	ZIKV	26.7799	44.7976	0.74227	0.00005
PCYT2	Mock	ZIKV	9.28884	15.5447	0.742848	0.00005
LMTK3	Mock	ZIKV	6.76134	11.3196	0.74344	0.00005
RASSF8	Mock	ZIKV	12.6501	21.1857	0.743941	0.00005
GZF1	Mock	ZIKV	7.59925	12.7286	0.744144	0.00005
UNC13A	Mock	ZIKV	4.5751	7.66379	0.744254	0.00005
SUGP1	Mock	ZIKV	23.3692	39.1481	0.744334	0.00005
SIK3	Mock	ZIKV	12.3186	20.6526	0.745486	0.00005
USP38	Mock	ZIKV	7.43745	12.47	0.74558	0.00005
IER5L	Mock	ZIKV	21.266	35.6666	0.746025	0.00005
GDAP2	Mock	ZIKV	4.05254	6.79932	0.746564	0.00005
RIOK3	Mock	ZIKV	25.0864	42.0903	0.746585	0.00005
BBS12	Mock	ZIKV	2.54627	4.27391	0.747168	0.00005
CLASRP	Mock	ZIKV	21.6499	36.3504	0.74761	0.00005
ZNF763	Mock	ZIKV	3.84953	6.46357	0.747649	0.00005
SEC61A1	Mock	ZIKV	59.5039	99.9577	0.748332	0.00005
MAP1LC3B	Mock	ZIKV	60.6867	101.996	0.749058	0.00005
SOSTDC1	Mock	ZIKV	3.27132	5.49809	0.749059	0.00005
GPR37	Mock	ZIKV	3.82766	6.44327	0.751331	0.00005
SNIP1	Mock	ZIKV	3.39188	5.71114	0.751693	0.00005
VPS8	Mock	ZIKV	12.2624	20.6512	0.751976	0.00005
SEC11C	Mock	ZIKV	50.8335	85.6739	0.753077	0.00005
WDR43	Mock	ZIKV	11.8111	19.9248	0.754419	0.00005
ASH1L	Mock	ZIKV	10.3935	17.5418	0.755115	0.00005
SKIDA1	Mock	ZIKV	6.15895	10.4026	0.756189	0.00005
RIPK2	Mock	ZIKV	2.88223	4.86872	0.756356	0.00005
ARCN1	Mock	ZIKV	42.4288	71.6902	0.756732	0.00005
RSRC2	Mock	ZIKV	51.6295	87.2589	0.757107	0.00005
SAFB	Mock	ZIKV	50.992	86.2263	0.757859	0.00005
USP25	Mock	ZIKV	7.75971	13.1295	0.758733	0.00005
DSCAML1	Mock	ZIKV	0.646771	1.09458	0.759056	0.00005
SEC63	Mock	ZIKV	24.0169	40.6861	0.760486	0.00005
AUH	Mock	ZIKV	9.67983	16.4185	0.762265	0.00005
KBTBD7	Mock	ZIKV	4.83726	8.20711	0.762684	0.00005
FAM126B	Mock	ZIKV	5.06088	8.58729	0.762815	0.00005
MIR22HG	Mock	ZIKV	3.69344	6.26892	0.763251	0.00005
MAST1	Mock	ZIKV	18.9497	32.1938	0.764608	0.00005
POR	Mock	ZIKV	43.6881	74.256	0.765268	0.00005
RBAK	Mock	ZIKV	6.62052	11.2536	0.765376	0.00005
PDGFC	Mock	ZIKV	5.64975	9.61102	0.766504	0.00005
CCND2	Mock	ZIKV	14.4875	24.6459	0.76654	0.00005
SNHG15	Mock	ZIKV	13.5545	23.0593	0.766575	0.00005
RAB30	Mock	ZIKV	5.07191	8.62869	0.766613	0.00005
AKAP10	Mock	ZIKV	6.9993	11.9104	0.766941	0.00005
RAB33B	Mock	ZIKV	2.64487	4.50267	0.767582	0.00005
EPS15	Mock	ZIKV	17.4898	29.7951	0.768565	0.00005
PRNP	Mock	ZIKV	11.994	20.4477	0.769628	0.00005
BAIAP3	Mock	ZIKV	14.4077	24.5692	0.770012	0.00005
FAM134B	Mock	ZIKV	1.79876	3.06796	0.770275	0.00005
CRTC2	Mock	ZIKV	11.826	20.1738	0.77052	0.00005
ALDOC	Mock	ZIKV	13.3395	22.7571	0.770615	0.00005
SLC10A7	Mock	ZIKV	2.40295	4.09967	0.770704	0.00005
POLR2H	Mock	ZIKV	30.2686	51.6607	0.771244	0.00005
SH3KBP1	Mock	ZIKV	1.79884	3.0745	0.773283	0.00005
SH3BGRL2	Mock	ZIKV	9.61759	16.4443	0.773839	0.00005
FAM167A	Mock	ZIKV	8.45454	14.4568	0.773951	0.00005
FEM1B	Mock	ZIKV	18.0603	30.899	0.774737	0.00005
KLHL24	Mock	ZIKV	22.7079	38.8548	0.774901	0.00005
STXBP3	Mock	ZIKV	13.6529	23.3707	0.775493	0.00005
TBC1D23	Mock	ZIKV	7.1351	12.216	0.775762	0.00005
IRF2BP1	Mock	ZIKV	9.36646	16.0417	0.776254	0.00005
MAPK13	Mock	ZIKV	1.76715	3.0283	0.777087	0.00005
RCOR3	Mock	ZIKV	21.976	37.6642	0.777268	0.00005
CEP85L	Mock	ZIKV	4.07067	6.97804	0.777555	0.00005
DOK6	Mock	ZIKV	4.97669	8.53398	0.778031	0.00005
BRAF	Mock	ZIKV	7.52115	12.9067	0.779097	0.00005
SGIP1	Mock	ZIKV	4.33264	7.43632	0.779341	0.00005
SOCS5	Mock	ZIKV	5.64381	9.69657	0.780805	0.00005
ALAS1	Mock	ZIKV	16.7227	28.7639	0.78245	0.00005
C1orf114	Mock	ZIKV	8.60382	14.8011	0.782657	0.00005
SEPHS2	Mock	ZIKV	11.8684	20.4187	0.782767	0.00005
EMC7	Mock	ZIKV	29.2254	50.2888	0.783013	0.00005
PPIG	Mock	ZIKV	27.1852	46.8106	0.784014	0.00005
KCNJ2	Mock	ZIKV	1.08285	1.86542	0.784663	0.00005
LSM10	Mock	ZIKV	16.8869	29.1085	0.785535	0.00005
BLOC1S2	Mock	ZIKV	18.2202	31.4321	0.786701	0.00005
YY1	Mock	ZIKV	32.363	55.8307	0.786716	0.00005
ITCH	Mock	ZIKV	14.3816	24.8377	0.788308	0.00005
MLL3	Mock	ZIKV	13.0603	22.5566	0.788358	0.00005
ZNF490	Mock	ZIKV	1.5551	2.68716	0.789069	0.00005
CERS4	Mock	ZIKV	30.2644	52.3007	0.789208	0.00005
RICTOR	Mock	ZIKV	9.89059	17.1025	0.790078	0.00005
HABP4	Mock	ZIKV	17.3395	29.9937	0.790602	0.00005
ZNF550	Mock	ZIKV	6.10263	10.5586	0.790915	0.00005
SCN2A	Mock	ZIKV	2.49053	4.30917	0.790956	0.00005
KCNB1	Mock	ZIKV	6.26258	10.8361	0.791017	0.00005
ZBTB34	Mock	ZIKV	5.71982	9.89906	0.791321	0.00005
CPEB3	Mock	ZIKV	1.67952	2.90687	0.791419	0.00005
DNAJA3	Mock	ZIKV	12.2726	21.2463	0.791764	0.00005
AEBP2	Mock	ZIKV	8.02099	13.892	0.792406	0.00005
MLL4	Mock	ZIKV	12.1968	21.1291	0.792736	0.00005
PSMD12	Mock	ZIKV	18.1611	31.4741	0.79331	0.00005
AEN	Mock	ZIKV	22.5404	39.0727	0.793647	0.00005
HERC4	Mock	ZIKV	8.43901	14.6301	0.793792	0.00005
RRAS2	Mock	ZIKV	13.7538	23.8582	0.794656	0.00005
FST	Mock	ZIKV	8.74619	15.1735	0.794824	0.00005
ZNF467	Mock	ZIKV	6.74461	11.7077	0.795647	0.00005
FAM117A	Mock	ZIKV	5.41848	9.41258	0.796701	0.00005
SLC16A7	Mock	ZIKV	1.12628	1.95745	0.797406	0.00005
CRKL	Mock	ZIKV	30.0453	52.2201	0.797465	0.00005
SREBF1	Mock	ZIKV	31.0605	54.0138	0.798245	0.00005
SMAD9	Mock	ZIKV	4.86991	8.4754	0.799385	0.00005
GUCY1A2	Mock	ZIKV	1.48907	2.59223	0.799781	0.00005
HELZ	Mock	ZIKV	7.3746	12.8499	0.801125	0.00005
EIF1	Mock	ZIKV	373.892	651.535	0.801224	0.00005
PAPD5	Mock	ZIKV	3.85141	6.71165	0.801281	0.00005
DNAJB11	Mock	ZIKV	34.139	59.5107	0.801727	0.00005
SLC7A14	Mock	ZIKV	0.733325	1.27956	0.803124	0.00005
SBNO1	Mock	ZIKV	9.21017	16.0719	0.803237	0.00005
FBLL1	Mock	ZIKV	10.2751	17.9377	0.803842	0.00005
SYN1	Mock	ZIKV	8.79979	15.3629	0.803908	0.00005
SSR1	Mock	ZIKV	9.93997	17.3575	0.804249	0.00005
RBM5	Mock	ZIKV	88.2638	154.136	0.80431	0.00005
CCT6P1	Mock	ZIKV	9.62659	16.8135	0.80452	0.00005
SNX2	Mock	ZIKV	27.7612	48.4995	0.804903	0.00005
WARS	Mock	ZIKV	26.0531	45.5207	0.805066	0.00005
C19orf10	Mock	ZIKV	31.4392	54.9457	0.805443	0.00005
TCEB3	Mock	ZIKV	11.1887	19.5623	0.80603	0.00005
XKR4	Mock	ZIKV	2.60593	4.55755	0.806462	0.00005
ZNF136	Mock	ZIKV	5.01445	8.77041	0.806553	0.00005
ZCCHC7	Mock	ZIKV	6.18809	10.8349	0.808116	0.00005
ZFAND1	Mock	ZIKV	18.6105	32.5966	0.808605	0.00005
HCFC2	Mock	ZIKV	3.77663	6.61587	0.808832	0.00005
TNRC6B	Mock	ZIKV	7.39666	12.9583	0.808929	0.00005
PRPF38B	Mock	ZIKV	23.5552	41.2813	0.809444	0.00005
MOSPD2	Mock	ZIKV	6.33129	11.1132	0.811698	0.00005
HAX1	Mock	ZIKV	36.0766	63.3437	0.812138	0.00005
ZSWIM3	Mock	ZIKV	2.39959	4.21537	0.812871	0.00005
ZNF699	Mock	ZIKV	3.06768	5.39793	0.815257	0.00005
FBRS	Mock	ZIKV	28.369	49.9285	0.815546	0.00005
LCA5	Mock	ZIKV	4.85499	8.54662	0.815886	0.00005
PRDM16	Mock	ZIKV	2.8165	4.96493	0.817869	0.00005
ZNF324	Mock	ZIKV	5.47538	9.65864	0.818861	0.00005
S1PR1	Mock	ZIKV	10.1575	17.926	0.819508	0.00005
MAP3K1	Mock	ZIKV	3.67809	6.49745	0.820917	0.00005
RGS3	Mock	ZIKV	10.3949	18.3697	0.821451	0.00005
FAM214A	Mock	ZIKV	13.8458	24.4803	0.822172	0.00005
RNF150	Mock	ZIKV	8.61681	15.2489	0.823476	0.00005
STOX2	Mock	ZIKV	12.055	21.3405	0.823959	0.00005
STYX	Mock	ZIKV	4.21342	7.45969	0.824123	0.00005
KIAA1244	Mock	ZIKV	1.5712	2.78235	0.824435	0.00005
WDR74	Mock	ZIKV	11.7352	20.7843	0.824657	0.00005
RNF41	Mock	ZIKV	8.96374	15.8802	0.825057	0.00005
RMND5A	Mock	ZIKV	17.1678	30.4411	0.826317	0.00005
SELK	Mock	ZIKV	47.7098	84.6035	0.826433	0.00005
SPOPL	Mock	ZIKV	6.67178	11.8345	0.826858	0.00005
LIF	Mock	ZIKV	0.993702	1.76282	0.826998	0.00005
SCAI	Mock	ZIKV	4.2549	7.54836	0.827037	0.00005
ZNF799	Mock	ZIKV	1.93514	3.43386	0.82739	0.00005
PROSER2	Mock	ZIKV	1.2389	2.19883	0.827674	0.00005
ZCCHC8	Mock	ZIKV	10.6388	18.8918	0.828423	0.00005
PTPRN	Mock	ZIKV	1.9652	3.49105	0.828983	0.00005
AKIRIN1	Mock	ZIKV	59.2866	105.376	0.829769	0.00005
C19orf26	Mock	ZIKV	13.724	24.4185	0.831271	0.00005
COPG1	Mock	ZIKV	36.8436	65.5904	0.83207	0.00005
MAST4	Mock	ZIKV	1.57239	2.80304	0.834035	0.00005
ID2	Mock	ZIKV	44.0456	78.5259	0.834173	0.00005
TRIM11	Mock	ZIKV	8.89595	15.8638	0.834517	0.00005
FRY	Mock	ZIKV	3.83946	6.85955	0.837209	0.00005
SMNDC1	Mock	ZIKV	22.8098	40.7564	0.837369	0.00005
SERTAD2	Mock	ZIKV	12.3977	22.1562	0.837637	0.00005
RPF2	Mock	ZIKV	9.07638	16.2268	0.838186	0.00005
ZNF330	Mock	ZIKV	15.6503	27.9905	0.838745	0.00005
PPIB	Mock	ZIKV	172.334	308.319	0.839217	0.00005
ZBTB20	Mock	ZIKV	1.81788	3.25606	0.840874	0.00005
IRS1	Mock	ZIKV	13.2156	23.6711	0.840883	0.00005
TAF3	Mock	ZIKV	5.42667	9.7254	0.84169	0.00005
GRPEL2	Mock	ZIKV	6.13703	11.0027	0.842241	0.00005
FRMD6	Mock	ZIKV	1.90842	3.42156	0.842279	0.00005
TSHZ3	Mock	ZIKV	2.0017	3.58905	0.842376	0.00005
ZCCHC10	Mock	ZIKV	11.5155	20.6767	0.844424	0.00005
FOXB1	Mock	ZIKV	3.91967	7.03991	0.844824	0.00005
FAM220A	Mock	ZIKV	10.3367	18.5654	0.844838	0.00005
REST	Mock	ZIKV	7.06825	12.6953	0.844873	0.00005
CPT1A	Mock	ZIKV	4.42526	7.95204	0.845564	0.00005
RIOK2	Mock	ZIKV	6.20524	11.1526	0.845819	0.00005
CCDC71L	Mock	ZIKV	5.89039	10.5962	0.847117	0.00005
SDF2L1	Mock	ZIKV	11.358	20.4443	0.847995	0.00005
SYNJ1	Mock	ZIKV	8.65049	15.5803	0.848869	0.00005
ZBTB2	Mock	ZIKV	7.44112	13.4057	0.849255	0.00005
ALKBH1	Mock	ZIKV	4.25344	7.66582	0.84981	0.00005
HIVEP1	Mock	ZIKV	6.30159	11.3656	0.850886	0.00005
NUFIP2	Mock	ZIKV	16.5077	29.8005	0.852204	0.00005
TNS1	Mock	ZIKV	0.462398	0.834777	0.852257	0.00005
C10orf118	Mock	ZIKV	5.74574	10.3735	0.852337	0.00005
NGFR	Mock	ZIKV	2.24632	4.05593	0.852465	0.00005
PMS2CL	Mock	ZIKV	4.53707	8.19564	0.853097	0.00005
ACSL3	Mock	ZIKV	31.9012	57.6304	0.853219	0.00005
GMPPA	Mock	ZIKV	6.84467	12.3698	0.853771	0.00005
HMHA1	Mock	ZIKV	6.34152	11.4677	0.854672	0.00005
SGK2	Mock	ZIKV	1.66939	3.02023	0.85534	0.00005
AGAP5	Mock	ZIKV	3.38387	6.12392	0.855784	0.00005
ZBTB6	Mock	ZIKV	6.00635	10.8801	0.857126	0.00005
PPM1D	Mock	ZIKV	11.1208	20.1502	0.857532	0.00005
C12orf45	Mock	ZIKV	12.4756	22.6315	0.859227	0.00005
TMEM130	Mock	ZIKV	3.20236	5.80999	0.859401	0.00005
MAP4K2	Mock	ZIKV	4.24908	7.7152	0.860553	0.00005
ISCU	Mock	ZIKV	36.3338	65.9773	0.86066	0.00005
MSL2	Mock	ZIKV	12.7468	23.1524	0.86103	0.00005
FBXO28	Mock	ZIKV	6.45585	11.7289	0.861394	0.00005
CITED2	Mock	ZIKV	41.0086	74.5507	0.862297	0.00005
DR1	Mock	ZIKV	23.7931	43.263	0.86259	0.00005
SETD7	Mock	ZIKV	6.96206	12.6615	0.862858	0.00005
SLC35B1	Mock	ZIKV	37.3358	67.9132	0.863134	0.00005
FBXL17	Mock	ZIKV	6.70472	12.2016	0.863823	0.00005
ATXN2	Mock	ZIKV	12.8643	23.4144	0.864024	0.00005
ARID4A	Mock	ZIKV	12.7189	23.1511	0.864106	0.00005
FZD5	Mock	ZIKV	1.29287	2.3544	0.864782	0.00005
RNF169	Mock	ZIKV	6.31436	11.5211	0.867575	0.00005
TADA2B	Mock	ZIKV	7.8763	14.4015	0.870626	0.00005
PPARGC1B	Mock	ZIKV	0.772955	1.41537	0.872725	0.00005
KCTD16	Mock	ZIKV	0.96333	1.76631	0.874636	0.00005
KCND1	Mock	ZIKV	1.15366	2.11679	0.875658	0.00005
SCFD1	Mock	ZIKV	22.5169	41.3469	0.876767	0.00005
CSRNP3	Mock	ZIKV	12.3367	22.7011	0.879812	0.00005
SMOX	Mock	ZIKV	6.48688	11.9454	0.880863	0.00005
PDZD8	Mock	ZIKV	10.8005	19.8895	0.880913	0.00005
STX5	Mock	ZIKV	21.1954	39.1004	0.883433	0.00005
FIGN	Mock	ZIKV	11.3711	20.9815	0.883745	0.00005
TAF1A	Mock	ZIKV	6.00882	11.0885	0.883909	0.00005
RARA	Mock	ZIKV	5.27754	9.75286	0.885961	0.00005
RABGEF1	Mock	ZIKV	5.94387	10.9844	0.885978	0.00005
UBTD1	Mock	ZIKV	3.09782	5.72554	0.886158	0.00005
PHLDA1	Mock	ZIKV	10.1968	18.8486	0.886344	0.00005
HUS1	Mock	ZIKV	4.28406	7.91938	0.886409	0.00005
HSPA5	Mock	ZIKV	128.734	238.127	0.887338	0.00005
MED8	Mock	ZIKV	12.1638	22.5024	0.887484	0.00005
PPP4R1L	Mock	ZIKV	3.30029	6.10856	0.888241	0.00005
ZNF804A	Mock	ZIKV	2.90364	5.37565	0.888578	0.00005
ARL5B	Mock	ZIKV	20.6926	38.3253	0.889183	0.00005
EDEM1	Mock	ZIKV	9.74407	18.0783	0.891664	0.00005
RBM24	Mock	ZIKV	3.03991	5.64359	0.892585	0.00005
FLRT3	Mock	ZIKV	7.91184	14.6986	0.893592	0.00005
CANX	Mock	ZIKV	168.684	313.788	0.895464	0.00005
C1orf51	Mock	ZIKV	2.16485	4.02811	0.895833	0.00005
GALK2	Mock	ZIKV	3.61895	6.74103	0.897396	0.00005
DNAJC1	Mock	ZIKV	11.697	21.7898	0.897519	0.00005
ZNF703	Mock	ZIKV	5.41375	10.0851	0.897529	0.00005
ARID5B	Mock	ZIKV	6.83488	12.7427	0.898684	0.00005
CLCN2	Mock	ZIKV	5.00018	9.32696	0.899427	0.00005
STT3A	Mock	ZIKV	38.7887	72.3572	0.8995	0.00005
MDM2	Mock	ZIKV	21.6675	40.4511	0.900648	0.00005
FAM169A	Mock	ZIKV	6.74363	12.5907	0.900758	0.00005
PRLR	Mock	ZIKV	0.674617	1.26	0.901288	0.00005
CA5B	Mock	ZIKV	1.2729	2.37962	0.902607	0.00005
HSPA14	Mock	ZIKV	12.237	22.9139	0.904974	0.00005
CCDC125	Mock	ZIKV	1.21475	2.27596	0.905817	0.00005
TOB1	Mock	ZIKV	16.5088	30.9315	0.905846	0.00005
NCOA7	Mock	ZIKV	2.19183	4.11012	0.907044	0.00005
NXF1	Mock	ZIKV	35.4066	66.407	0.907314	0.00005
CRY1	Mock	ZIKV	10.3201	19.3602	0.907639	0.00005
SLC39A14	Mock	ZIKV	7.7585	14.5809	0.91023	0.00005
SLC25A25	Mock	ZIKV	17.6156	33.2023	0.914429	0.00005
PDP2	Mock	ZIKV	2.60981	4.92671	0.916683	0.00005
ZXDA	Mock	ZIKV	1.29838	2.45164	0.917037	0.00005
REL	Mock	ZIKV	2.03394	3.84154	0.917405	0.00005
CAMK2D	Mock	ZIKV	14.9287	28.2216	0.918712	0.00005
RAB39B	Mock	ZIKV	6.96055	13.1783	0.920893	0.00005
PDE4A	Mock	ZIKV	0.827201	1.56755	0.922205	0.00005
FNDC3B	Mock	ZIKV	5.77885	10.962	0.923652	0.00005
SGTB	Mock	ZIKV	6.14004	11.6512	0.924165	0.00005
ZNF639	Mock	ZIKV	8.87548	16.8653	0.926159	0.00005
TRAM1	Mock	ZIKV	34.4958	65.6418	0.928193	0.00005
TSHZ2	Mock	ZIKV	1.11672	2.12554	0.928566	0.00005
HIVEP2	Mock	ZIKV	2.90537	5.53441	0.929709	0.00005
PDHX	Mock	ZIKV	10.475	19.9651	0.93053	0.00005
KCNA3	Mock	ZIKV	1.16388	2.21895	0.930932	0.00005
VPS37A	Mock	ZIKV	5.807	11.0794	0.932009	0.00005
TIGD2	Mock	ZIKV	2.99656	5.72116	0.932999	0.00005
FAM184A	Mock	ZIKV	7.17961	13.7167	0.93396	0.00005
HMBOX1	Mock	ZIKV	5.31696	10.1597	0.934181	0.00005
C16orf87	Mock	ZIKV	15.6411	29.8997	0.934791	0.00005
TMF1	Mock	ZIKV	9.516	18.2064	0.936018	0.00005
LMO4	Mock	ZIKV	16.212	31.0181	0.936048	0.00005
RORA	Mock	ZIKV	2.37778	4.5497	0.936155	0.00005
GOLGA2	Mock	ZIKV	16.7285	32.0352	0.937345	0.00005
SOX9	Mock	ZIKV	4.28862	8.21281	0.937364	0.00005
NMD3	Mock	ZIKV	14.0638	26.9982	0.940872	0.00005
EIF2S2	Mock	ZIKV	33.4189	64.1575	0.940951	0.00005
RAB11FIP5	Mock	ZIKV	2.1773	4.18495	0.942671	0.00005
RLIM	Mock	ZIKV	11.7777	22.6532	0.94366	0.00005
GRIN2B	Mock	ZIKV	0.820384	1.58088	0.94636	0.00005
EEA1	Mock	ZIKV	6.32894	12.1997	0.946814	0.00005
C18orf25	Mock	ZIKV	6.02268	11.6214	0.9483	0.00005
BCL6	Mock	ZIKV	5.1849	10.0065	0.948552	0.00005
CDR2	Mock	ZIKV	5.84395	11.2803	0.948793	0.00005
MTHFD1L	Mock	ZIKV	16.2774	31.4207	0.948844	0.00005
GFPT1	Mock	ZIKV	13.334	25.7803	0.95116	0.00005
JMY	Mock	ZIKV	5.60868	10.8483	0.951733	0.00005
SAR1B	Mock	ZIKV	5.87545	11.3663	0.951996	0.00005
WNK3	Mock	ZIKV	3.71694	7.20151	0.954184	0.00005
RNF152	Mock	ZIKV	4.51123	8.75991	0.957397	0.00005
ESCO1	Mock	ZIKV	5.56438	10.8071	0.957693	0.00005
C2CD2L	Mock	ZIKV	7.03809	13.6782	0.958619	0.00005
NFIL3	Mock	ZIKV	9.0129	17.5232	0.959202	0.00005
ELL	Mock	ZIKV	3.02689	5.88504	0.959215	0.00005
PURA	Mock	ZIKV	2.83706	5.51756	0.959633	0.00005
NADKD1	Mock	ZIKV	12.5771	24.5157	0.96291	0.00005
PDZRN3	Mock	ZIKV	2.87101	5.60209	0.964407	0.00005
SLC35F3	Mock	ZIKV	2.7014	5.2759	0.965712	0.00005
NR1D2	Mock	ZIKV	10.7645	21.0349	0.966505	0.00005
ARFGAP3	Mock	ZIKV	22.7824	44.5934	0.968912	0.00005
TSC22D2	Mock	ZIKV	10.9777	21.4977	0.969603	0.00005
PVT1	Mock	ZIKV	3.27151	6.41338	0.971129	0.00005
SDE2	Mock	ZIKV	7.04955	13.8218	0.97134	0.00005
MIA3	Mock	ZIKV	14.6884	28.8019	0.971492	0.00005
ZBTB49	Mock	ZIKV	2.76936	5.43465	0.972638	0.00005
AKAP8L	Mock	ZIKV	64.7193	127.068	0.973335	0.00005
PLK2	Mock	ZIKV	29.4299	57.8425	0.974845	0.00005
ERN1	Mock	ZIKV	1.29069	2.53808	0.975591	0.00005
ABCF3	Mock	ZIKV	11.7994	23.2315	0.977362	0.00005
NEU1	Mock	ZIKV	16.8076	33.107	0.978019	0.00005
TBX19	Mock	ZIKV	1.09699	2.16181	0.97868	0.00005
JMJD1C	Mock	ZIKV	17.3634	34.2352	0.979432	0.00005
RAB21	Mock	ZIKV	14.3239	28.2813	0.981421	0.00005
ZRSR2	Mock	ZIKV	7.38699	14.6356	0.986424	0.00005
PIM3	Mock	ZIKV	11.3874	22.592	0.988374	0.00005
LOC595101	Mock	ZIKV	1.23868	2.45865	0.989065	0.00005
EEF2K	Mock	ZIKV	1.92773	3.83113	0.990865	0.00005
SH2B3	Mock	ZIKV	2.88387	5.73172	0.990962	0.00005
PRKAA2	Mock	ZIKV	5.13916	10.2328	0.9936	0.00005
LIN7B	Mock	ZIKV	5.88924	11.731	0.994175	0.00005
CCDC30	Mock	ZIKV	2.70183	5.3837	0.994659	0.00005
PSPH	Mock	ZIKV	9.22707	18.387	0.994744	0.00005
TINCR	Mock	ZIKV	1.09056	2.17411	0.995355	0.00005
MTO1	Mock	ZIKV	4.36427	8.70087	0.995417	0.00005
ATG2B	Mock	ZIKV	8.68579	17.3206	0.995763	0.00005
INSIG1	Mock	ZIKV	46.7882	93.4043	0.997345	0.00005
ZDBF2	Mock	ZIKV	6.68989	13.3685	0.998784	0.00005
LARP6	Mock	ZIKV	5.91796	11.8303	0.999309	0.00005
HSPA9	Mock	ZIKV	53.0341	106.077	1.00012	0.00005
TRPS1	Mock	ZIKV	5.51623	11.0367	1.00055	0.00005
PTP4A1	Mock	ZIKV	59.2282	118.744	1.00349	0.00005
MGAT2	Mock	ZIKV	12.6351	25.3354	1.00371	0.00005
ALPK3	Mock	ZIKV	0.434369	0.871744	1.00498	0.00005
DERL2	Mock	ZIKV	18.8324	37.8039	1.00532	0.00005
SPATA17	Mock	ZIKV	3.21298	6.45572	1.00667	0.00005
SLC41A2	Mock	ZIKV	1.9781	3.97586	1.00715	0.00005
NFKB2	Mock	ZIKV	3.72372	7.50651	1.0114	0.00005
ERO1LB	Mock	ZIKV	3.71399	7.48697	1.01141	0.00005
GOLGA4	Mock	ZIKV	14.9164	30.1178	1.01371	0.00005
NFAT5	Mock	ZIKV	9.25838	18.7014	1.01431	0.00005
PARD6B	Mock	ZIKV	2.29327	4.63296	1.01453	0.00005
DDX58	Mock	ZIKV	1.22326	2.47192	1.0149	0.00005
SKIL	Mock	ZIKV	15.3213	30.9824	1.01591	0.00005
ATF3	Mock	ZIKV	26.2022	53.0097	1.01657	0.00005
TVP23B	Mock	ZIKV	9.33444	18.9006	1.0178	0.00005
CHORDC1	Mock	ZIKV	12.3123	24.9446	1.01863	0.00005
PHLDB3	Mock	ZIKV	1.52295	3.08675	1.01922	0.00005
CCRN4L	Mock	ZIKV	2.7629	5.60146	1.01962	0.00005
CCDC174	Mock	ZIKV	8.53858	17.3126	1.01975	0.00005
PLEKHF2	Mock	ZIKV	4.76099	9.65568	1.02012	0.00005
TIPARP	Mock	ZIKV	5.77319	11.7174	1.02121	0.00005
SLC1A5	Mock	ZIKV	26.4427	53.6869	1.0217	0.00005
APLF	Mock	ZIKV	0.766657	1.55952	1.02445	0.00005
ZNF555	Mock	ZIKV	2.60665	5.31035	1.02661	0.00005
ZNF709	Mock	ZIKV	4.04732	8.24854	1.02717	0.00005
CDC37L1	Mock	ZIKV	7.30725	14.8962	1.02754	0.00005
PPFIBP1	Mock	ZIKV	6.41622	13.0887	1.02853	0.00005
NR4A1	Mock	ZIKV	10.4525	21.3672	1.03156	0.00005
MAP3K8	Mock	ZIKV	1.10862	2.26775	1.03249	0.00005
PPP2R2B	Mock	ZIKV	11.7367	24.0174	1.03305	0.00005
OVGP1	Mock	ZIKV	2.16442	4.43608	1.0353	0.00005
LIN37	Mock	ZIKV	8.57721	17.5885	1.03605	0.00005
UHMK1	Mock	ZIKV	9.88459	20.2822	1.03696	0.00005
OSBP	Mock	ZIKV	12.2329	25.1057	1.03725	0.00005
SLC25A33	Mock	ZIKV	12.9284	26.5363	1.03742	0.00005
RBMS1	Mock	ZIKV	4.01815	8.25272	1.03834	0.00005
DUSP14	Mock	ZIKV	11.0304	22.6657	1.03903	0.00005
RNF19B	Mock	ZIKV	9.34543	19.2329	1.04125	0.00005
UBR3	Mock	ZIKV	11.8815	24.5046	1.04433	0.00005
FAM43A	Mock	ZIKV	1.61284	3.32677	1.04452	0.00005
ZMAT4	Mock	ZIKV	4.85266	10.0148	1.04528	0.00005
AHCYL2	Mock	ZIKV	9.90446	20.445	1.0456	0.00005
GOLGB1	Mock	ZIKV	24.4305	50.4353	1.04575	0.00005
UBE2E2	Mock	ZIKV	9.4045	19.4195	1.04609	0.00005
PPM1H	Mock	ZIKV	0.923705	1.90778	1.04639	0.00005
GPT2	Mock	ZIKV	18.1502	37.4937	1.04667	0.00005
DUSP15	Mock	ZIKV	3.44793	7.13587	1.04936	0.00005
SLC35G2	Mock	ZIKV	3.17844	6.58109	1.05001	0.00005
NFKBIE	Mock	ZIKV	3.62731	7.51749	1.05135	0.00005
SOCS1	Mock	ZIKV	2.20154	4.56366	1.05168	0.00005
CCDC64	Mock	ZIKV	5.88834	12.2216	1.0535	0.00005
GOLGA3	Mock	ZIKV	9.92542	20.6233	1.05508	0.00005
SLC4A10	Mock	ZIKV	2.47331	5.14347	1.0563	0.00005
RNF113A	Mock	ZIKV	7.11744	14.8298	1.05907	0.00005
INO80D	Mock	ZIKV	4.02162	8.39115	1.06109	0.00005
C12orf23	Mock	ZIKV	9.76273	20.3756	1.06149	0.00005
YOD1	Mock	ZIKV	8.60214	17.9558	1.06169	0.00005
ABCA1	Mock	ZIKV	9.71186	20.2818	1.06237	0.00005
SMAD7	Mock	ZIKV	3.58815	7.50161	1.06396	0.00005
ZXDB	Mock	ZIKV	3.80391	7.95368	1.06414	0.00005
ACVR1	Mock	ZIKV	6.5989	13.8147	1.06591	0.00005
FGFR1OP2	Mock	ZIKV	17.4383	36.5445	1.0674	0.00005
NUCB2	Mock	ZIKV	21.1223	44.4473	1.07333	0.00005
SPTY2D1	Mock	ZIKV	5.04335	10.6203	1.07437	0.00005
CLK1	Mock	ZIKV	42.4612	89.4279	1.07458	0.00005
ABCG1	Mock	ZIKV	5.92011	12.4776	1.07564	0.00005
CDKN2AIP	Mock	ZIKV	21.2133	44.8701	1.08079	0.00005
RBM15	Mock	ZIKV	6.81615	14.469	1.08594	0.00005
NEK7	Mock	ZIKV	14.7523	31.3336	1.08677	0.00005
RC3H1	Mock	ZIKV	6.76597	14.3811	1.08781	0.00005
UTY	Mock	ZIKV	6.25818	13.3165	1.0894	0.00005
HSD17B14	Mock	ZIKV	2.96921	6.32698	1.09144	0.00005
AMMECR1	Mock	ZIKV	2.49397	5.31562	1.09179	0.00005
LPPR4	Mock	ZIKV	0.824723	1.75934	1.09305	0.00005
KLHL28	Mock	ZIKV	7.04063	15.0282	1.09389	0.00005
NAMPT	Mock	ZIKV	8.23045	17.5692	1.09401	0.00005
ZNF79	Mock	ZIKV	3.56041	7.6081	1.09549	0.00005
ITPKC	Mock	ZIKV	5.80281	12.4023	1.09578	0.00005
PER1	Mock	ZIKV	7.76766	16.6034	1.09593	0.00005
TBL2	Mock	ZIKV	12.1384	26.0196	1.10002	0.00005
SBDSP1	Mock	ZIKV	11.4473	24.5388	1.10006	0.00005
NFXL1	Mock	ZIKV	5.9496	12.7599	1.10075	0.00005
CHIC2	Mock	ZIKV	12.9654	27.8313	1.10205	0.00005
RBM39	Mock	ZIKV	131.914	283.206	1.10225	0.00005
MED26	Mock	ZIKV	2.96886	6.38033	1.10372	0.00005
ZNF433	Mock	ZIKV	4.50103	9.67355	1.10379	0.00005
SRPRB	Mock	ZIKV	9.41092	20.2386	1.1047	0.00005
PELO	Mock	ZIKV	2.95623	6.39456	1.11309	0.00005
HIST1H2BD	Mock	ZIKV	13.3347	28.8528	1.11352	0.00005
PGPEP1	Mock	ZIKV	2.9184	6.33052	1.11715	0.00005
ZNF264	Mock	ZIKV	4.31196	9.35562	1.11749	0.00005
FNIP1	Mock	ZIKV	5.74417	12.4845	1.11997	0.00005
AGO3	Mock	ZIKV	4.11738	8.95219	1.12051	0.00005
GEM	Mock	ZIKV	2.3506	5.11113	1.12061	0.00005
SIX4	Mock	ZIKV	1.21982	2.65874	1.12407	0.00005
SYDE2	Mock	ZIKV	2.0981	4.57552	1.12485	0.00005
ATF5	Mock	ZIKV	7.73419	16.8758	1.12564	0.00005
SAMD4A	Mock	ZIKV	1.75904	3.83875	1.12585	0.00005
RAB5A	Mock	ZIKV	24.2898	53.0654	1.12742	0.00005
KLHL15	Mock	ZIKV	6.1189	13.3689	1.12754	0.00005
PLEKHH3	Mock	ZIKV	8.98074	19.6262	1.12787	0.00005
UGDH	Mock	ZIKV	15.7235	34.3712	1.12828	0.00005
ZBTB43	Mock	ZIKV	5.2305	11.4608	1.13168	0.00005
SEC24A	Mock	ZIKV	9.99208	21.9103	1.13275	0.00005
SND1	Mock	ZIKV	40.5489	89.0296	1.13462	0.00005
ING2	Mock	ZIKV	9.89581	21.7579	1.13665	0.00005
OSGIN2	Mock	ZIKV	2.67033	5.87484	1.13753	0.00005
NCK1	Mock	ZIKV	7.17688	15.7965	1.13818	0.00005
SSR3	Mock	ZIKV	29.1137	64.1684	1.14017	0.00005
DDX3Y	Mock	ZIKV	26.117	57.5836	1.14067	0.00005
ZNF844	Mock	ZIKV	6.28229	13.8859	1.14426	0.00005
NUDT4	Mock	ZIKV	6.15925	13.6173	1.14461	0.00005
PCLO	Mock	ZIKV	5.43823	12.0294	1.14535	0.00005
DNAJC25	Mock	ZIKV	8.92359	19.7399	1.14542	0.00005
TIMP3	Mock	ZIKV	6.4893	14.3859	1.14852	0.00005
VCPIP1	Mock	ZIKV	3.26236	7.23706	1.14949	0.00005
PER2	Mock	ZIKV	2.7183	6.04093	1.15207	0.00005
SEC23B	Mock	ZIKV	21.9513	48.7839	1.1521	0.00005
PDCD2L	Mock	ZIKV	6.68565	14.8613	1.15242	0.00005
SH3BGR	Mock	ZIKV	2.92904	6.52422	1.15538	0.00005
FLRT2	Mock	ZIKV	0.882904	1.96665	1.15541	0.00005
VIMP	Mock	ZIKV	27.1855	60.7469	1.15998	0.00005
PLCD1	Mock	ZIKV	8.78935	19.6405	1.16	0.00005
SMIM14	Mock	ZIKV	24.26	54.2158	1.16013	0.00005
SLC15A2	Mock	ZIKV	0.999818	2.23858	1.16285	0.00005
FOXO1	Mock	ZIKV	3.33685	7.47459	1.16351	0.00005
INPP5B	Mock	ZIKV	4.8087	10.7726	1.16365	0.00005
POLR2A	Mock	ZIKV	63.7791	143.12	1.16607	0.00005
RAD52	Mock	ZIKV	6.73915	15.1263	1.16642	0.00005
SARS	Mock	ZIKV	101.771	228.475	1.16671	0.00005
PPP1R3B	Mock	ZIKV	1.20243	2.70387	1.16907	0.00005
GOLGA5	Mock	ZIKV	11.6664	26.2434	1.1696	0.00005
GPR176	Mock	ZIKV	2.57232	5.78696	1.16974	0.00005
COG3	Mock	ZIKV	9.96719	22.4564	1.17187	0.00005
BMPER	Mock	ZIKV	0.434639	0.981549	1.17524	0.00005
SNX18	Mock	ZIKV	4.92542	11.1357	1.17687	0.00005
PNPLA3	Mock	ZIKV	1.7103	3.86778	1.17725	0.00005
HM13	Mock	ZIKV	56.0359	126.763	1.17771	0.00005
MAFB	Mock	ZIKV	2.04086	4.61933	1.17851	0.00005
TSC22D3	Mock	ZIKV	15.5354	35.1898	1.17959	0.00005
BMP2	Mock	ZIKV	0.8847	2.00408	1.17968	0.00005
RREB1	Mock	ZIKV	1.53149	3.47548	1.18228	0.00005
SNAPC1	Mock	ZIKV	4.17884	9.49185	1.18359	0.00005
CLK4	Mock	ZIKV	7.24802	16.5017	1.18696	0.00005
TRPM4	Mock	ZIKV	4.23134	9.63401	1.18702	0.00005
FLCN	Mock	ZIKV	8.12896	18.5181	1.18779	0.00005
ZMAT3	Mock	ZIKV	10.6658	24.3038	1.18819	0.00005
ACBD3	Mock	ZIKV	10.6824	24.3559	1.18904	0.00005
DPP8	Mock	ZIKV	6.2765	14.3175	1.18975	0.00005
FRMD3	Mock	ZIKV	0.813374	1.87706	1.20648	0.00005
SYNM	Mock	ZIKV	1.64449	3.79556	1.20668	0.00005
CA2	Mock	ZIKV	22.0825	51.0327	1.20852	0.00005
SLC7A1	Mock	ZIKV	10.2839	23.7792	1.20931	0.00005
RRBP1	Mock	ZIKV	3.63115	8.39977	1.20992	0.00005
NUDT4P1	Mock	ZIKV	18.2308	42.1832	1.21029	0.00005
PID1	Mock	ZIKV	1.55211	3.59292	1.21093	0.00005
UHRF1BP1	Mock	ZIKV	7.11802	16.5056	1.21341	0.00005
LGALS9	Mock	ZIKV	1.31835	3.07851	1.2235	0.00005
CGN	Mock	ZIKV	0.926617	2.16425	1.22382	0.00005
CRY2	Mock	ZIKV	7.77418	18.1787	1.22548	0.00005
ERF	Mock	ZIKV	11.8104	27.636	1.22649	0.00005
NFE2L2	Mock	ZIKV	16.5224	38.7629	1.23025	0.00005
RENBP	Mock	ZIKV	3.46552	8.1445	1.23275	0.00005
C14orf28	Mock	ZIKV	1.3406	3.15401	1.23431	0.00005
ATXN1	Mock	ZIKV	2.07549	4.89649	1.23829	0.00005
CCT6P3	Mock	ZIKV	6.13236	14.4923	1.24077	0.00005
MARS	Mock	ZIKV	56.2449	132.929	1.24086	0.00005
SUGT1	Mock	ZIKV	18.1406	42.8842	1.24123	0.00005
CNKSR3	Mock	ZIKV	1.43323	3.39608	1.2446	0.00005
AARS	Mock	ZIKV	35.5835	84.5314	1.24828	0.00005
MBNL2	Mock	ZIKV	8.45811	20.1163	1.24996	0.00005
CXCL12	Mock	ZIKV	1.46522	3.49724	1.2551	0.00005
IGSF1	Mock	ZIKV	1.2215	2.91921	1.25692	0.00005
IARS	Mock	ZIKV	37.3386	89.3103	1.25816	0.00005
C16orf72	Mock	ZIKV	10.167	24.3492	1.25997	0.00005
TMEM39A	Mock	ZIKV	5.28515	12.6699	1.26139	0.00005
INPP4B	Mock	ZIKV	0.497905	1.19619	1.26451	0.00005
TMEM214	Mock	ZIKV	10.763	25.8685	1.26512	0.00005
MYC	Mock	ZIKV	7.02923	16.9027	1.26582	0.00005
NR3C1	Mock	ZIKV	0.600496	1.44573	1.26757	0.00005
TRIM23	Mock	ZIKV	5.90615	14.2504	1.27071	0.00005
IRS2	Mock	ZIKV	7.08948	17.1169	1.27167	0.00005
ARHGAP23	Mock	ZIKV	5.60394	13.5413	1.27285	0.00005
SQSTM1	Mock	ZIKV	26.9311	65.1961	1.27552	0.00005
COQ10B	Mock	ZIKV	4.27436	10.38	1.28003	0.00005
KLHL11	Mock	ZIKV	5.04925	12.293	1.2837	0.00005
CSRNP1	Mock	ZIKV	3.70313	9.02246	1.28478	0.00005
PPIL4	Mock	ZIKV	16.8909	41.2233	1.28721	0.00005
DBP	Mock	ZIKV	3.4139	8.36749	1.29337	0.00005
PHGDH	Mock	ZIKV	85.4025	209.528	1.29479	0.00005
SLC7A3	Mock	ZIKV	12.3721	30.4208	1.29796	0.00005
PSAT1	Mock	ZIKV	65.3692	161.09	1.30118	0.00005
SNTB1	Mock	ZIKV	1.00266	2.47332	1.30262	0.00005
PYCR1	Mock	ZIKV	21.4789	53.0414	1.3042	0.00005
EIF2AK3	Mock	ZIKV	8.60031	21.2694	1.30632	0.00005
FAM222A	Mock	ZIKV	3.70714	9.1744	1.30731	0.00005
EPHX1	Mock	ZIKV	4.02306	9.98119	1.31092	0.00005
CDK2AP2	Mock	ZIKV	17.3068	43	1.313	0.00005
WIPI1	Mock	ZIKV	6.81412	16.9546	1.31508	0.00005
GARS	Mock	ZIKV	47.3868	118.061	1.31697	0.00005
TGDS	Mock	ZIKV	4.7919	11.9398	1.31711	0.00005
GFOD1	Mock	ZIKV	0.850565	2.12028	1.31776	0.00005
TAF1D	Mock	ZIKV	17.5644	44.1376	1.32935	0.00005
SLC1A4	Mock	ZIKV	11.4491	28.7977	1.33072	0.00005
USP53	Mock	ZIKV	0.854481	2.15259	1.33295	0.00005
EXOC8	Mock	ZIKV	4.01619	10.1676	1.34008	0.00005
ELMSAN1	Mock	ZIKV	3.19231	8.08415	1.3405	0.00005
ZBTB7B	Mock	ZIKV	1.95197	4.95308	1.3434	0.00005
TVP23C-CDRT4	Mock	ZIKV	5.484	13.9378	1.34571	0.00005
PPP1R15B	Mock	ZIKV	19.7077	50.1372	1.34712	0.00005
DMGDH	Mock	ZIKV	0.47094	1.19951	1.34882	0.00005
MXD1	Mock	ZIKV	4.39084	11.1934	1.35008	0.00005
DNAH2	Mock	ZIKV	0.258951	0.660144	1.3501	0.00005
TMEM135	Mock	ZIKV	3.73259	9.55585	1.35621	0.00005
TNFRSF10D	Mock	ZIKV	1.09394	2.80091	1.35636	0.00005
RRAGC	Mock	ZIKV	7.80229	19.9986	1.35793	0.00005
TUBE1	Mock	ZIKV	11.443	29.3425	1.35852	0.00005
HYOU1	Mock	ZIKV	54.0856	138.907	1.3608	0.00005
LIN7C	Mock	ZIKV	6.90768	17.7516	1.36167	0.00005
LOC100505687	Mock	ZIKV	12.6589	32.6621	1.36746	0.00005
SLC16A6	Mock	ZIKV	1.56184	4.0378	1.37032	0.00005
TUFT1	Mock	ZIKV	3.72935	9.71795	1.38173	0.00005
LRIF1	Mock	ZIKV	12.2843	32.0558	1.38377	0.00005
TROVE2	Mock	ZIKV	11.4017	29.8708	1.38948	0.00005
TIMM44	Mock	ZIKV	17.8334	47.0092	1.39836	0.00005
MAGEL2	Mock	ZIKV	7.06064	18.6304	1.39979	0.00005
LDLRAD4	Mock	ZIKV	1.82366	4.81238	1.39992	0.00005
BBC3	Mock	ZIKV	20.2517	53.4932	1.40131	0.00005
SERTAD1	Mock	ZIKV	4.31657	11.4113	1.40251	0.00005
CREBRF	Mock	ZIKV	4.47981	11.9268	1.41269	0.00005
PDIA5	Mock	ZIKV	2.66399	7.09584	1.41338	0.00005
PAR5	Mock	ZIKV	10.9268	29.15	1.41562	0.00005
MGAM	Mock	ZIKV	0.824358	2.19951	1.41584	0.00005
PHC3	Mock	ZIKV	7.22792	19.3627	1.42163	0.00005
RND1	Mock	ZIKV	2.67005	7.17988	1.42709	0.00005
ALG2	Mock	ZIKV	6.01019	16.2029	1.43077	0.00005
SLC30A1	Mock	ZIKV	6.29427	16.9753	1.43133	0.00005
ZNF654	Mock	ZIKV	5.05129	13.6754	1.43686	0.00005
FICD	Mock	ZIKV	1.15137	3.12482	1.44042	0.00005
ALDH8A1	Mock	ZIKV	2.32437	6.33406	1.44629	0.00005
DHRS2	Mock	ZIKV	0.544617	1.48463	1.44679	0.00005
DIRAS2	Mock	ZIKV	2.01137	5.4841	1.44708	0.00005
SYVN1	Mock	ZIKV	15.8513	43.3868	1.45266	0.00005
IRF1	Mock	ZIKV	0.332277	0.909608	1.45286	0.00005
KLF10	Mock	ZIKV	7.46553	20.4485	1.45368	0.00005
CBX4	Mock	ZIKV	18.0758	49.7912	1.46183	0.00005
HSD17B7P2	Mock	ZIKV	2.1886	6.09839	1.47842	0.00005
SHISA2	Mock	ZIKV	1.82773	5.1063	1.48222	0.00005
ZNF805	Mock	ZIKV	2.49307	7.00519	1.4905	0.00005
ADRA1A	Mock	ZIKV	1.27228	3.58528	1.49466	0.00005
ZNF460	Mock	ZIKV	2.01534	5.79419	1.52358	0.00005
ASS1	Mock	ZIKV	4.85603	14.0152	1.52914	0.00005
NANS	Mock	ZIKV	6.78377	19.5968	1.53046	0.00005
TNFSF13B	Mock	ZIKV	0.435897	1.26375	1.53565	0.00005
IGIP	Mock	ZIKV	0.733315	2.14345	1.54743	0.00005
AKNA	Mock	ZIKV	3.45115	10.2082	1.56458	0.00005
SPRY4	Mock	ZIKV	0.641598	1.90879	1.57291	0.00005
SIAH2	Mock	ZIKV	2.81495	8.38759	1.57514	0.00005
XPOT	Mock	ZIKV	26.332	78.5307	1.57644	0.00005
TARS	Mock	ZIKV	32.4977	97.4383	1.58415	0.00005
GAN	Mock	ZIKV	1.60634	4.83456	1.5896	0.00005
SP8	Mock	ZIKV	3.44884	10.4228	1.59555	0.00005
YARS	Mock	ZIKV	28.605	86.6736	1.59933	0.00005
NR4A3	Mock	ZIKV	1.02948	3.14689	1.612	0.00005
LYSMD3	Mock	ZIKV	5.39681	16.5191	1.61396	0.00005
SAFB2	Mock	ZIKV	19.4787	60.0134	1.62339	0.00005
HERC5	Mock	ZIKV	0.242127	0.7462	1.6238	0.00005
CCDC81	Mock	ZIKV	0.66317	2.07548	1.646	0.00005
NEDD4	Mock	ZIKV	0.874542	2.73915	1.64713	0.00005
PPP1R3C	Mock	ZIKV	0.61577	1.94307	1.65787	0.00005
BAMBI	Mock	ZIKV	9.7132	30.6563	1.65816	0.00005
HIST2H2BC	Mock	ZIKV	6.52391	20.6567	1.6628	0.00005
SHMT2	Mock	ZIKV	46.5224	147.914	1.66876	0.00005
PLD6	Mock	ZIKV	0.66078	2.10736	1.6732	0.00005
NFIA	Mock	ZIKV	0.729433	2.33027	1.67565	0.00005
PPARGC1A	Mock	ZIKV	0.374716	1.21242	1.69402	0.00005
OTUD1	Mock	ZIKV	3.63667	11.8619	1.70564	0.00005
WHAMM	Mock	ZIKV	2.16857	7.08019	1.70704	0.00005
ALDH1L2	Mock	ZIKV	1.99549	6.53164	1.71071	0.00005
CCDC163P	Mock	ZIKV	0.770011	2.53554	1.71934	0.00005
SLC3A2	Mock	ZIKV	75.4712	250.856	1.73286	0.00005
ZNF442	Mock	ZIKV	1.50166	5.07682	1.75737	0.00005
ETV5	Mock	ZIKV	3.09959	10.5088	1.76145	0.00005
DNAJC3	Mock	ZIKV	5.25071	17.8248	1.7633	0.00005
NR1D1	Mock	ZIKV	1.49106	5.06445	1.76407	0.00005
PMAIP1	Mock	ZIKV	9.79348	33.4624	1.77265	0.00005
TNFAIP3	Mock	ZIKV	0.840944	2.90083	1.78638	0.00005
HEY1	Mock	ZIKV	1.79974	6.28273	1.8036	0.00005
ANKRD33B	Mock	ZIKV	1.29605	4.55246	1.81252	0.00005
PCDH20	Mock	ZIKV	0.456539	1.61836	1.82572	0.00005
DNAJB9	Mock	ZIKV	17.2669	62.7534	1.86169	0.00005
ZNF563	Mock	ZIKV	0.4469	1.63522	1.87146	0.00005
CREB3L2	Mock	ZIKV	5.29175	19.413	1.87521	0.00005
TSPYL2	Mock	ZIKV	10.9947	40.6869	1.88775	0.00005
GDF15	Mock	ZIKV	4.39593	16.3578	1.89574	0.00005
EIF4EBP1	Mock	ZIKV	21.0335	78.3633	1.89749	0.00005
PGF	Mock	ZIKV	1.20852	4.672	1.9508	0.00005
GADD45B	Mock	ZIKV	4.89207	18.9623	1.95462	0.00005
DDIT4	Mock	ZIKV	30.0558	116.763	1.95787	0.00005
PXDC1	Mock	ZIKV	1.18476	4.67636	1.98079	0.00005
NOG	Mock	ZIKV	0.902698	3.64666	2.01426	0.00005
SESN2	Mock	ZIKV	12.0888	50.3169	2.05737	0.00005
JDP2	Mock	ZIKV	1.28353	5.42453	2.07939	0.00005
ASNS	Mock	ZIKV	52.0919	225.033	2.111	0.00005
VEGFA	Mock	ZIKV	12.4628	54.1793	2.12011	0.00005
CTH	Mock	ZIKV	4.43016	19.2695	2.12089	0.00005
CARS	Mock	ZIKV	23.075	100.59	2.12408	0.00005
KCNE2	Mock	ZIKV	0.608671	2.69304	2.1455	0.00005
PCK2	Mock	ZIKV	2.84455	12.9623	2.18805	0.00005
NR3C2	Mock	ZIKV	0.145518	0.663687	2.18931	0.00005
MTHFD2	Mock	ZIKV	20.1732	94.9895	2.23532	0.00005
TRIB3	Mock	ZIKV	5.94568	28.0405	2.2376	0.00005
KLF5	Mock	ZIKV	0.385202	1.87422	2.2826	0.00005
FAM129A	Mock	ZIKV	0.351848	1.71845	2.28808	0.00005
CDC42EP1	Mock	ZIKV	0.865481	4.41466	2.35073	0.00005
KLF15	Mock	ZIKV	2.85013	14.696	2.36633	0.00005
HERPUD1	Mock	ZIKV	22.7461	118.833	2.38525	0.00005
ARHGAP9	Mock	ZIKV	0.347537	1.87155	2.42899	0.00005
SLC7A5	Mock	ZIKV	23.9931	130.452	2.44283	0.00005
SELPLG	Mock	ZIKV	0.198417	1.10411	2.47628	0.00005
XBP1	Mock	ZIKV	26.8835	150.39	2.48392	0.00005
INHBE	Mock	ZIKV	0.578206	3.2351	2.48416	0.00005
BHLHE40	Mock	ZIKV	1.19032	6.74644	2.50278	0.00005
RELB	Mock	ZIKV	0.607664	3.4895	2.52167	0.00005
FOSL1	Mock	ZIKV	0.519074	3.03201	2.54626	0.00005
SLC7A11	Mock	ZIKV	2.87422	16.9325	2.55855	0.00005
ULBP1	Mock	ZIKV	1.35929	8.58462	2.6589	0.00005
DDR2	Mock	ZIKV	0.316819	2.03434	2.68283	0.00005
AQPEP	Mock	ZIKV	0.214698	1.42058	2.72609	0.00005
ADM2	Mock	ZIKV	0.512443	3.41852	2.73791	0.00005
IL20RB	Mock	ZIKV	0.592619	3.9674	2.74302	0.00005
STC2	Mock	ZIKV	0.845712	6.11647	2.85446	0.00005
DDIT3	Mock	ZIKV	14.8864	114.376	2.94172	0.00005
CREB3L1	Mock	ZIKV	0.328817	2.57961	2.9718	0.00005
CHAC1	Mock	ZIKV	4.96756	39.4118	2.98802	0.00005
SEC24D	Mock	ZIKV	1.93693	16.2261	3.06648	0.00005
CEBPB	Mock	ZIKV	2.75768	23.4179	3.08608	0.00005
BHLHE41	Mock	ZIKV	0.0717453	0.763637	3.41193	0.00005
TNFRSF14	Mock	ZIKV	0.143098	1.56024	3.4467	0.00005
SIGLEC10	Mock	ZIKV	0.810017	0.0664947	-3.60664	0.00005
CCNO	Mock	ZIKV	4.30137	0.53558	-3.00562	0.00005
RRM2	Mock	ZIKV	34.1419	5.48555	-2.63783	0.00005
SFXN2	Mock	ZIKV	5.93441	0.967533	-2.61672	0.00005
COLEC12	Mock	ZIKV	0.875222	0.143901	-2.60458	0.00005
CHRNA1	Mock	ZIKV	5.02148	0.846344	-2.5688	0.00005
DHFR	Mock	ZIKV	53.4126	9.23853	-2.53145	0.00005
MFI2	Mock	ZIKV	1.9761	0.347521	-2.50748	0.00005
MAPK15	Mock	ZIKV	20.7939	3.77391	-2.46203	0.00005
C21orf58	Mock	ZIKV	11.4277	2.1697	-2.39697	0.00005
SPEF1	Mock	ZIKV	1.78022	0.338308	-2.39565	0.00005
ATG16L2	Mock	ZIKV	5.80167	1.1441	-2.34225	0.00005
LOC100134868	Mock	ZIKV	6.6332	1.34332	-2.3039	0.00005
SUSD2	Mock	ZIKV	7.24014	1.48148	-2.28898	0.00005
C6orf118	Mock	ZIKV	5.98062	1.23151	-2.27987	0.00005
DLX6-AS1	Mock	ZIKV	3.14473	0.653523	-2.26662	0.00005
ADAM28	Mock	ZIKV	0.630283	0.131671	-2.25906	0.00005
C17orf72	Mock	ZIKV	1.09581	0.232334	-2.23773	0.00005
NXPH2	Mock	ZIKV	1.17552	0.250823	-2.22856	0.00005
AQP7P1	Mock	ZIKV	1.70333	0.364215	-2.2255	0.00005
EFCAB1	Mock	ZIKV	1.66037	0.361564	-2.19918	0.00005
WNT8B	Mock	ZIKV	45.952	10.0449	-2.19366	0.00005
PI15	Mock	ZIKV	18.3203	4.05363	-2.17615	0.00005
OTX2-AS1	Mock	ZIKV	0.858558	0.190734	-2.17035	0.00005
LOC100507032	Mock	ZIKV	1.15984	0.258594	-2.16517	0.00005
GINS3	Mock	ZIKV	6.46625	1.44722	-2.15965	0.00005
MFGE8	Mock	ZIKV	40.2086	9.30133	-2.112	0.00005
SPARCL1	Mock	ZIKV	4.20209	0.974964	-2.10768	0.00005
TPBG	Mock	ZIKV	191.205	44.9644	-2.08826	0.00005
SLC35G1	Mock	ZIKV	1.02038	0.240317	-2.08609	0.00005
MFI2-AS1	Mock	ZIKV	6.59999	1.5699	-2.07179	0.00005
VSX1	Mock	ZIKV	1.75166	0.419639	-2.0615	0.00005
TTF2	Mock	ZIKV	3.9222	0.944564	-2.05394	0.00005
SLC6A16	Mock	ZIKV	2.81808	0.679649	-2.05185	0.00005
KCNJ2-AS1	Mock	ZIKV	1.29628	0.312764	-2.05123	0.00005
ATHL1	Mock	ZIKV	8.46073	2.05377	-2.04251	0.00005
EMILIN2	Mock	ZIKV	1.07357	0.267416	-2.00526	0.00005
SPC24	Mock	ZIKV	9.18216	2.29269	-2.00179	0.00005
ART5	Mock	ZIKV	2.36852	0.595252	-1.99241	0.00005
NRGN	Mock	ZIKV	3.02313	0.765049	-1.98242	0.00005
EGR3	Mock	ZIKV	13.5077	3.4285	-1.97813	0.00005
PPFIA4	Mock	ZIKV	4.97917	1.26831	-1.973	0.00005
SPON2	Mock	ZIKV	3.39686	0.872257	-1.96138	0.00005
AQP7P3	Mock	ZIKV	11.183	2.8748	-1.95978	0.00005
LOC643401	Mock	ZIKV	26.1175	6.74903	-1.95226	0.00005
RDM1	Mock	ZIKV	2.02621	0.529359	-1.93647	0.00005
UHRF1	Mock	ZIKV	28.7659	7.52346	-1.93489	0.00005
DUSP23	Mock	ZIKV	5.3384	1.40784	-1.92293	0.00005
RNASE4	Mock	ZIKV	2.06416	0.545542	-1.91979	0.00005
MCM6	Mock	ZIKV	30.1178	7.96902	-1.91814	0.00005
TCF19	Mock	ZIKV	6.89786	1.83752	-1.90839	0.00005
GDF10	Mock	ZIKV	39.9571	10.7196	-1.8982	0.00005
CEP152	Mock	ZIKV	5.53591	1.50158	-1.88234	0.00005
MYLK	Mock	ZIKV	4.42557	1.20605	-1.87557	0.00005
LOC100505648	Mock	ZIKV	3.88473	1.0599	-1.87389	0.00005
GDPD2	Mock	ZIKV	9.03461	2.47079	-1.87049	0.00005
TEK	Mock	ZIKV	0.824733	0.225733	-1.86931	0.00005
SCARA3	Mock	ZIKV	4.23261	1.16408	-1.86235	0.00005
PLAT	Mock	ZIKV	0.827737	0.22867	-1.8559	0.00005
VTCN1	Mock	ZIKV	1.11604	0.311018	-1.84332	0.00005
SLC2A4	Mock	ZIKV	1.12867	0.315695	-1.83802	0.00005
CENPM	Mock	ZIKV	16.2502	4.55329	-1.83548	0.00005
CCNB1	Mock	ZIKV	52.4407	14.7138	-1.83352	0.00005
LOC100506233	Mock	ZIKV	11.0387	3.10358	-1.83056	0.00005
CILP2	Mock	ZIKV	4.1398	1.17345	-1.8188	0.00005
CD248	Mock	ZIKV	2.44054	0.692247	-1.81784	0.00005
E2F2	Mock	ZIKV	4.93902	1.40491	-1.81375	0.00005
PGAP3	Mock	ZIKV	8.57487	2.4523	-1.80598	0.00005
WSB1	Mock	ZIKV	1510.07	432.483	-1.8039	0.00005
GALNT12	Mock	ZIKV	8.16934	2.34569	-1.80021	0.00005
BCL2L2-PABPN1	Mock	ZIKV	75.9843	21.9076	-1.79427	0.00005
NTSR1	Mock	ZIKV	4.6173	1.33247	-1.79294	0.00005
SLC44A3	Mock	ZIKV	7.93021	2.30247	-1.78418	0.00005
MCM4	Mock	ZIKV	39.5149	11.4818	-1.78305	0.00005
NCAPH	Mock	ZIKV	8.48194	2.46459	-1.78305	0.00005
DGCR5	Mock	ZIKV	1.62268	0.479192	-1.7597	0.00005
HPDL	Mock	ZIKV	1.57883	0.466784	-1.75803	0.00005
MCM3	Mock	ZIKV	43.5562	12.9109	-1.75429	0.00005
ASF1B	Mock	ZIKV	14.8831	4.43026	-1.74821	0.00005
DDX11	Mock	ZIKV	13.1953	3.93447	-1.74578	0.00005
BTBD17	Mock	ZIKV	82.6365	24.873	-1.7322	0.00005
E2F1	Mock	ZIKV	26.7148	8.04177	-1.73205	0.00005
SLC43A3	Mock	ZIKV	0.957012	0.28838	-1.73057	0.00005
SNRPA	Mock	ZIKV	60.1597	18.1485	-1.72894	0.00005
TRIM45	Mock	ZIKV	21.168	6.39741	-1.72633	0.00005
LOC646168	Mock	ZIKV	2.15248	0.652233	-1.72254	0.00005
PMEL	Mock	ZIKV	1.63696	0.497176	-1.71919	0.00005
RAD51AP1	Mock	ZIKV	15.5002	4.70888	-1.71883	0.00005
STOX1	Mock	ZIKV	1.58189	0.481453	-1.71618	0.00005
PLAUR	Mock	ZIKV	3.55308	1.08439	-1.71219	0.00005
GLB1L	Mock	ZIKV	5.04734	1.54473	-1.70817	0.00005
GINS4	Mock	ZIKV	8.19618	2.51325	-1.7054	0.00005
BRCA1	Mock	ZIKV	8.95543	2.7468	-1.70501	0.00005
CTSL2	Mock	ZIKV	1.23166	0.378524	-1.70214	0.00005
MBOAT1	Mock	ZIKV	1.06678	0.328264	-1.70033	0.00005
CDCA3	Mock	ZIKV	20.8038	6.41614	-1.69707	0.00005
ACBD7	Mock	ZIKV	15.5718	4.8042	-1.69656	0.00005
FAM122B	Mock	ZIKV	14.604	4.55292	-1.6815	0.00005
GINS2	Mock	ZIKV	35.1129	11.0212	-1.67172	0.00005
CDC7	Mock	ZIKV	13.8347	4.34448	-1.67103	0.00005
TTC32	Mock	ZIKV	9.66665	3.04575	-1.66622	0.00005
IZUMO4	Mock	ZIKV	5.80232	1.83175	-1.6634	0.00005
FANCD2	Mock	ZIKV	14.5566	4.59921	-1.66222	0.00005
SPAG6	Mock	ZIKV	2.82268	0.895093	-1.65696	0.00005
FLJ31306	Mock	ZIKV	40.0562	12.7064	-1.65647	0.00005
BUB1B	Mock	ZIKV	24.1215	7.66016	-1.65487	0.00005
SLC25A10	Mock	ZIKV	7.09287	2.2576	-1.65158	0.00005
RAD51	Mock	ZIKV	6.07518	1.94154	-1.64573	0.00005
PAQR6	Mock	ZIKV	5.98713	1.93018	-1.63313	0.00005
LOC283177	Mock	ZIKV	1.76717	0.570312	-1.63161	0.00005
FAM111B	Mock	ZIKV	3.64105	1.17648	-1.62988	0.00005
KIAA1755	Mock	ZIKV	0.903176	0.291993	-1.62907	0.00005
OIP5	Mock	ZIKV	13.4961	4.37033	-1.62673	0.00005
ABHD16B	Mock	ZIKV	3.68379	1.19296	-1.62665	0.00005
TRIP13	Mock	ZIKV	6.89292	2.23251	-1.62645	0.00005
CCDC19	Mock	ZIKV	1.94566	0.631891	-1.62251	0.00005
SAMD15	Mock	ZIKV	3.47714	1.13651	-1.61329	0.00005
FLJ46906	Mock	ZIKV	5.62627	1.84234	-1.61064	0.00005
LOC100506054	Mock	ZIKV	3.89588	1.27578	-1.61057	0.00005
FBLN7	Mock	ZIKV	5.52888	1.81074	-1.61041	0.00005
MAK	Mock	ZIKV	1.73151	0.567619	-1.60904	0.00005
CDK2	Mock	ZIKV	29.9841	9.85202	-1.60571	0.00005
ANKRD34B	Mock	ZIKV	3.6468	1.20396	-1.59885	0.00005
ERMAP	Mock	ZIKV	3.64191	1.20272	-1.5984	0.00005
PROM1	Mock	ZIKV	10.5053	3.47768	-1.59493	0.00005
KCNK2	Mock	ZIKV	1.44528	0.479172	-1.59273	0.00005
C1orf216	Mock	ZIKV	6.08957	2.02218	-1.59043	0.00005
KIFC1	Mock	ZIKV	31.2261	10.3721	-1.59004	0.00005
UNC50	Mock	ZIKV	32.2922	10.7783	-1.58306	0.00005
XRCC2	Mock	ZIKV	7.97586	2.66488	-1.58157	0.00005
SARS2	Mock	ZIKV	12.4423	4.15975	-1.58069	0.00005
DDX12P	Mock	ZIKV	5.87183	1.97258	-1.57373	0.00005
SAPCD2	Mock	ZIKV	12.393	4.16738	-1.57231	0.00005
CENPK	Mock	ZIKV	18.2829	6.15754	-1.57007	0.00005
IMPA2	Mock	ZIKV	10.8634	3.67679	-1.56296	0.00005
RD3	Mock	ZIKV	0.994074	0.336542	-1.56257	0.00005
SFRP2	Mock	ZIKV	480.639	162.786	-1.56197	0.00005
COL12A1	Mock	ZIKV	0.675838	0.23036	-1.55279	0.00005
EMILIN3	Mock	ZIKV	11.5136	3.92774	-1.55157	0.00005
NME5	Mock	ZIKV	7.24066	2.47361	-1.5495	0.00005
PIF1	Mock	ZIKV	11.9596	4.08687	-1.5491	0.00005
LOC729013	Mock	ZIKV	5.28636	1.80724	-1.54848	0.00005
KDELC2	Mock	ZIKV	6.88804	2.3584	-1.54628	0.00005
AURKB	Mock	ZIKV	49.17	16.8746	-1.54293	0.00005
SDC1	Mock	ZIKV	21.1631	7.2661	-1.5423	0.00005
CLSPN	Mock	ZIKV	4.80638	1.65344	-1.53948	0.00005
KIF19	Mock	ZIKV	4.31374	1.48441	-1.53905	0.00005
PABPN1	Mock	ZIKV	41.6024	14.3579	-1.53482	0.00005
ACYP1	Mock	ZIKV	32.2776	11.162	-1.53194	0.00005
ENPP1	Mock	ZIKV	0.981995	0.340077	-1.52985	0.00005
DLGAP5	Mock	ZIKV	25.8165	9.00609	-1.51932	0.00005
LINC00472	Mock	ZIKV	4.84566	1.69054	-1.51921	0.00005
MCM5	Mock	ZIKV	31.9678	11.1746	-1.51639	0.00005
MCM2	Mock	ZIKV	46.0244	16.102	-1.51516	0.00005
DSCC1	Mock	ZIKV	7.45626	2.6094	-1.51473	0.00005
NID1	Mock	ZIKV	2.07787	0.72785	-1.51339	0.00005
TMEM80	Mock	ZIKV	7.99078	2.80534	-1.51016	0.00005
PYCRL	Mock	ZIKV	4.17166	1.46566	-1.50907	0.00005
MED11	Mock	ZIKV	6.69997	2.36687	-1.50118	0.00005
DTL	Mock	ZIKV	11.6342	4.11367	-1.49987	0.00005
FLT4	Mock	ZIKV	0.917688	0.324838	-1.49829	0.00005
ASB16-AS1	Mock	ZIKV	8.89913	3.15494	-1.49605	0.00005
MMP2	Mock	ZIKV	7.22021	2.56126	-1.49519	0.00005
C1QTNF6	Mock	ZIKV	7.27339	2.58231	-1.49397	0.00005
HYAL1	Mock	ZIKV	1.35553	0.481698	-1.49266	0.00005
GABPB1-AS1	Mock	ZIKV	12.9252	4.60228	-1.48977	0.00005
WDR76	Mock	ZIKV	3.83815	1.37838	-1.47744	0.00005
CYP26B1	Mock	ZIKV	9.74987	3.50148	-1.47742	0.00005
FANCB	Mock	ZIKV	1.77015	0.636514	-1.47561	0.00005
BIRC5	Mock	ZIKV	38.673	13.93	-1.47313	0.00005
HES6	Mock	ZIKV	458.282	165.232	-1.47174	0.00005
ATP1A2	Mock	ZIKV	0.705665	0.254622	-1.47062	0.00005
SGOL2	Mock	ZIKV	10.4207	3.77349	-1.46548	0.00005
LOC642846	Mock	ZIKV	3.36894	1.22217	-1.46285	0.00005
SMIM7	Mock	ZIKV	30.4819	11.0582	-1.46284	0.00005
OLFML2A	Mock	ZIKV	1.05767	0.384278	-1.46067	0.00005
OLIG3	Mock	ZIKV	6.48879	2.36295	-1.45736	0.00005
PSMG3-AS1	Mock	ZIKV	3.31998	1.20939	-1.4569	0.00005
HYAL2	Mock	ZIKV	42.9039	15.6534	-1.45464	0.00005
MKRN3	Mock	ZIKV	21.1597	7.74115	-1.4507	0.00005
C10orf114	Mock	ZIKV	6.45843	2.36357	-1.45021	0.00005
SLC38A4	Mock	ZIKV	2.24434	0.824021	-1.44554	0.00005
ACTC1	Mock	ZIKV	4.33595	1.59555	-1.44229	0.00005
OLFML2B	Mock	ZIKV	2.9443	1.08346	-1.44228	0.00005
ATF6B	Mock	ZIKV	51.4517	18.9395	-1.44182	0.00005
ARHGEF6	Mock	ZIKV	3.43016	1.26416	-1.44009	0.00005
EMB	Mock	ZIKV	5.61677	2.07003	-1.44009	0.00005
MFAP2	Mock	ZIKV	71.5649	26.4559	-1.43566	0.00005
ORC6	Mock	ZIKV	25.5913	9.46072	-1.43563	0.00005
SLC19A1	Mock	ZIKV	6.71354	2.48242	-1.43533	0.00005
CPAMD8	Mock	ZIKV	2.07057	0.766279	-1.43408	0.00005
MIS18BP1	Mock	ZIKV	11.9929	4.45353	-1.42916	0.00005
TMEM194A	Mock	ZIKV	18.3202	6.80743	-1.42825	0.00005
KCNAB3	Mock	ZIKV	2.01764	0.752086	-1.4237	0.00005
CDCA7	Mock	ZIKV	16.0813	5.99482	-1.42359	0.00005
MAPK11	Mock	ZIKV	36.4828	13.6309	-1.42034	0.00005
DPY19L2	Mock	ZIKV	3.36007	1.25621	-1.41942	0.00005
LOC100272228	Mock	ZIKV	7.04284	2.64307	-1.41395	0.00005
ITGB5	Mock	ZIKV	13.3888	5.048	-1.40724	0.00005
CENPI	Mock	ZIKV	6.12824	2.31591	-1.40389	0.00005
RABL2A	Mock	ZIKV	9.71278	3.67137	-1.40357	0.00005
C19orf57	Mock	ZIKV	2.42022	0.915129	-1.40309	0.00005
TNFAIP8	Mock	ZIKV	2.23079	0.845925	-1.39895	0.00005
KIAA0101	Mock	ZIKV	13.6888	5.19246	-1.39851	0.00005
MCM10	Mock	ZIKV	9.08775	3.44719	-1.3985	0.00005
RBM14	Mock	ZIKV	16.144	6.12616	-1.39794	0.00005
10-Sep	Mock	ZIKV	22.5815	8.57177	-1.39748	0.00005
METTL3	Mock	ZIKV	34.5605	13.135	-1.39571	0.00005
IRS4	Mock	ZIKV	7.59487	2.89875	-1.38959	0.00005
PLEKHH2	Mock	ZIKV	0.912058	0.348232	-1.38908	0.00005
FOSB	Mock	ZIKV	134.086	51.3114	-1.38581	0.00005
PIGW	Mock	ZIKV	2.82191	1.0853	-1.37857	0.00005
CEMP1	Mock	ZIKV	8.49384	3.26927	-1.37745	0.00005
BHLHE23	Mock	ZIKV	3.20201	1.23277	-1.37707	0.00005
ARGLU1	Mock	ZIKV	173.807	67.0666	-1.37382	0.00005
APOLD1	Mock	ZIKV	2.30218	0.88837	-1.37377	0.00005
CDH24	Mock	ZIKV	25.8319	9.98442	-1.3714	0.00005
LENG8	Mock	ZIKV	71.2716	27.557	-1.37091	0.00005
IQGAP3	Mock	ZIKV	10.2495	3.96793	-1.3691	0.00005
POLD1	Mock	ZIKV	18.2362	7.07088	-1.36684	0.00005
OGFOD3	Mock	ZIKV	5.96806	2.32256	-1.36155	0.00005
PROCA1	Mock	ZIKV	7.37259	2.87315	-1.35954	0.00005
POLA2	Mock	ZIKV	11.157	4.35755	-1.35636	0.00005
B3GNTL1	Mock	ZIKV	3.94546	1.54418	-1.35335	0.00005
CDKN2C	Mock	ZIKV	6.63467	2.60034	-1.35133	0.00005
SUZ12P1	Mock	ZIKV	27.4597	10.767	-1.3507	0.00005
DNAI1	Mock	ZIKV	4.27431	1.67599	-1.35068	0.00005
TRABD2B	Mock	ZIKV	1.5532	0.609365	-1.34986	0.00005
TTC31	Mock	ZIKV	10.2527	4.03819	-1.34422	0.00005
NUP62CL	Mock	ZIKV	4.38912	1.73332	-1.34039	0.00005
PLEKHB1	Mock	ZIKV	3.52025	1.39041	-1.34017	0.00005
SLC18A1	Mock	ZIKV	14.4419	5.70924	-1.33889	0.00005
CAHM	Mock	ZIKV	4.99498	1.97965	-1.33524	0.00005
SMIM11	Mock	ZIKV	10.6679	4.22808	-1.3352	0.00005
IGFBP4	Mock	ZIKV	13.8159	5.49098	-1.33119	0.00005
VWA1	Mock	ZIKV	4.46397	1.77588	-1.32979	0.00005
GPC3	Mock	ZIKV	181.68	72.3287	-1.32876	0.00005
TOP2A	Mock	ZIKV	90.5651	36.0761	-1.32791	0.00005
USP43	Mock	ZIKV	4.42546	1.76302	-1.32777	0.00005
DNA2	Mock	ZIKV	7.83487	3.12304	-1.32696	0.00005
SNHG3	Mock	ZIKV	6.28345	2.50514	-1.32666	0.00005
RMI2	Mock	ZIKV	15.5622	6.20946	-1.3255	0.00005
SIRPA	Mock	ZIKV	2.97538	1.18804	-1.32449	0.00005
ZNF732	Mock	ZIKV	1.35273	0.541134	-1.32182	0.00005
ATP5S	Mock	ZIKV	7.56457	3.02638	-1.32167	0.00005
HCG18	Mock	ZIKV	9.04824	3.62454	-1.31984	0.00005
ADAM11	Mock	ZIKV	2.53183	1.01529	-1.31829	0.00005
LOC646903	Mock	ZIKV	4.41806	1.77333	-1.31695	0.00005
C1orf106	Mock	ZIKV	6.26078	2.51774	-1.31421	0.00005
AHSA2	Mock	ZIKV	26.1476	10.5201	-1.31353	0.00005
CTSC	Mock	ZIKV	9.00863	3.625	-1.31333	0.00005
EHHADH	Mock	ZIKV	1.03987	0.419351	-1.31017	0.00005
GRIN2A	Mock	ZIKV	6.04508	2.44353	-1.30679	0.00005
ILF3-AS1	Mock	ZIKV	10.6739	4.31579	-1.30639	0.00005
OGG1	Mock	ZIKV	12.9112	5.22125	-1.30616	0.00005
[truncated: 4,865 more rows]
