# Supplementary material for: Zika infection of neural progenitor cells perturbs transcription in neurodevelopmental pathways
Source: PLoS One. 2017 Apr 27;12(4):e0175744. doi: 10.1371/journal.pone.0175744 (PMC5407828; doi:10.1371/journal.pone.0175744)
Supplement: S3 Table — The 289 transcripts that demonstrate isoform divergence, in that at least one isoform of a gene is downregulated and at least one isoform of the same gene is upregulated. The column names are identical to those in S1 Table. There are one additional column: effect of zika infection, corresponding to the log 2 fold-change in expression levels in zika infected samples compared to mock infected samples. (CSV) [file pone.0175744.s003.csv]

	target_id	pval	qval	ens_gene	ext_gene	effect of zika infection (FC in log2)
1	ENST00000281182.8	0.000846724	0.022283037	ENSG00000151498	ACAD8	0.524762696
2	ENST00000524502.2	2.88E-05	0.002468297	ENSG00000151498	ACAD8	-0.833523387
3	ENST00000525961.1	0.001633939	0.034374582	ENSG00000151498	ACAD8	-1.14449503
4	ENST00000527082.5	0.000181509	0.007904577	ENSG00000151498	ACAD8	-1.062870658
5	ENST00000531338.5	4.35E-06	0.000823267	ENSG00000151498	ACAD8	-0.900624837
6	ENST00000533387.5	0.000174062	0.00770444	ENSG00000151498	ACAD8	-0.664672648
7	ENST00000396029.7	3.03E-05	0.002530486	ENSG00000101126	ADNP	-0.67474805
8	ENST00000396032.7	0.001693668	0.035187074	ENSG00000101126	ADNP	0.22828784
9	ENST00000156471.9	0.000192074	0.00820057	ENSG00000021776	AQR	-0.50372732
10	ENST00000543879.6	0.000501175	0.015538017	ENSG00000021776	AQR	0.52263224
11	ENST00000559090.5	5.70E-07	0.000270459	ENSG00000021776	AQR	1.224589775
12	ENST00000396432.6	0.002697724	0.047399243	ENSG00000107863	ARHGAP21	-0.20627876
13	ENST00000486374.5	0.000244307	0.009681446	ENSG00000107863	ARHGAP21	0.34834674
14	ENST00000638156.1	0.001990919	0.039037153	ENSG00000107863	ARHGAP21	-0.279102291
15	ENST00000313432.5	4.64E-06	0.000841092	ENSG00000174437	ATP2A2	-0.519161246
16	ENST00000539276.6	0.000876897	0.022839248	ENSG00000174437	ATP2A2	0.244424828
17	ENST00000574428.5	0.0014	0.03101894	ENSG00000123472	ATPAF1	0.487982877
18	ENST00000576409.5	5.81E-05	0.003811273	ENSG00000123472	ATPAF1	-0.491966541
19	ENST00000321300.10	0.000694235	0.019495106	ENSG00000175866	BAIAP2	-0.769037916
20	ENST00000428708.6	9.60E-06	0.001273987	ENSG00000175866	BAIAP2	0.552078926
21	ENST00000340611.8	0.000208334	0.008691257	ENSG00000106009	BRAT1	-0.436445058
22	ENST00000493232.5	2.92E-05	0.002481471	ENSG00000106009	BRAT1	0.708091307
23	ENST00000263377.6	0.000272336	0.010423151	ENSG00000141867	BRD4	0.455086337
24	ENST00000371835.8	0.000930856	0.023701458	ENSG00000141867	BRD4	-0.303730595
25	ENST00000310351.8	6.73E-06	0.001066783	ENSG00000175455	CCDC14	5.513800324
26	ENST00000409657.5	0.000665188	0.018950603	ENSG00000175455	CCDC14	-1.381713757
27	ENST00000488653.6	0.000213271	0.008840607	ENSG00000175455	CCDC14	-1.22114641
28	ENST00000463260.5	0.000123069	0.006106308	ENSG00000221978	CCNL2	0.734823559
29	ENST00000463895.1	0.002874863	0.049302322	ENSG00000221978	CCNL2	1.240951065
30	ENST00000473872.5	0.000585357	0.017293274	ENSG00000221978	CCNL2	0.928698378
31	ENST00000480479.5	8.20E-05	0.004765125	ENSG00000221978	CCNL2	-0.730713376
32	ENST00000505849.5	0.001003259	0.024897154	ENSG00000221978	CCNL2	4.450449373
33	ENST00000566827.5	4.84E-05	0.003371155	ENSG00000140937	CDH11	-0.570279798
34	ENST00000619158.1	7.71E-05	0.004590584	ENSG00000140937	CDH11	0.875855175
35	ENST00000358779.9	0.001703605	0.035309251	ENSG00000008128	CDK11A	4.838769721
36	ENST00000378633.5	1.98E-05	0.001946884	ENSG00000008128	CDK11A	-5.131361903
37	ENST00000394196.8	0.002304203	0.042646536	ENSG00000173575	CHD2	0.231622924
38	ENST00000625662.2	0.00119132	0.027853964	ENSG00000173575	CHD2	0.2574728
39	ENST00000627622.1	0.001720591	0.03553907	ENSG00000173575	CHD2	-0.810818828
40	ENST00000637572.1	7.06E-05	0.004318934	ENSG00000173575	CHD2	1.171529346
41	ENST00000636709.1	2.92E-05	0.002481471	ENSG00000175344	CHRNA7	-0.56164705
42	ENST00000637033.1	0.000121981	0.006066236	ENSG00000175344	CHRNA7	4.486610235
43	ENST00000637189.1	0.000637455	0.018393017	ENSG00000175344	CHRNA7	-0.671581575
44	ENST00000366860.9	0.002255363	0.042090626	ENSG00000143771	CNIH4	0.755162198
45	ENST00000465271.5	8.18E-05	0.004760232	ENSG00000143771	CNIH4	-0.604541193
46	ENST00000370096.7	9.32E-05	0.005113831	ENSG00000060718	COL11A1	-0.819326628
47	ENST00000635193.1	4.66E-05	0.003315383	ENSG00000060718	COL11A1	0.740560974
48	ENST00000490820.2	0.001523064	0.032736484	ENSG00000137504	CREBZF	-0.604537965
49	ENST00000527447.1	0.000438432	0.01411213	ENSG00000137504	CREBZF	0.376346151
50	ENST00000402739.8	0.00059949	0.017570917	ENSG00000066032	CTNNA2	-0.537459672
51	ENST00000496558.5	0.000135823	0.006536283	ENSG00000066032	CTNNA2	0.341081499
52	ENST00000391881.7	0.000864843	0.022592909	ENSG00000105443	CYTH2	0.416421664
53	ENST00000427476.4	4.53E-05	0.00326897	ENSG00000105443	CYTH2	-0.592983923
54	ENST00000620214.1	4.20E-05	0.003098429	ENSG00000105443	CYTH2	-0.774687638
55	ENST00000255448.8	0.002262352	0.042180865	ENSG00000133083	DCLK1	0.374925584
56	ENST00000460982.1	0.000928589	0.023674038	ENSG00000133083	DCLK1	-0.788148061
57	ENST00000361471.8	0.00160626	0.034011462	ENSG00000198947	DMD	3.485487531
58	ENST00000378680.6	0.002249497	0.042071342	ENSG00000198947	DMD	3.43020642
59	ENST00000541735.5	0.002004475	0.03923073	ENSG00000198947	DMD	-4.087969938
60	ENST00000302060.9	0.001247049	0.028693122	ENSG00000170464	DNAJC18	-0.230569344
61	ENST00000508445.5	0.002563441	0.045900618	ENSG00000170464	DNAJC18	2.873692378
62	ENST00000368813.1	0.000610747	0.017814198	ENSG00000107938	EDRF1	0.942382466
63	ENST00000525091.5	0.002426825	0.044308918	ENSG00000107938	EDRF1	-0.591359095
64	ENST00000351393.10	0.002922523	0.049861731	ENSG00000134759	ELP2	0.387377234
65	ENST00000358232.10	2.15E-05	0.002063311	ENSG00000134759	ELP2	-0.528582167
66	ENST00000536830.1	0.002156828	0.040967632	ENSG00000134759	ELP2	0.697113653
67	ENST00000541294.1	0.000276218	0.010527686	ENSG00000134759	ELP2	0.86843272
68	ENST00000397938.6	0.000277204	0.010544431	ENSG00000182944	EWSR1	-1.744623887
69	ENST00000469669.5	0.002134673	0.040740797	ENSG00000182944	EWSR1	0.401199055
70	ENST00000493426.1	0.002197875	0.041462204	ENSG00000182944	EWSR1	2.520039848
71	ENST00000397091.9	0.002500995	0.045210075	ENSG00000077782	FGFR1	-0.610281256
72	ENST00000470826.5	0.000998869	0.024813269	ENSG00000077782	FGFR1	0.657577292
73	ENST00000532791.5	0.000786083	0.021148923	ENSG00000077782	FGFR1	-1.365695175
74	ENST00000349556.4	9.13E-05	0.005049396	ENSG00000213066	FGFR1OP	0.475910097
75	ENST00000622353.4	0.000292267	0.010929662	ENSG00000213066	FGFR1OP	-0.859213015
76	ENST00000335154.9	0.000157019	0.007176782	ENSG00000161791	FMNL3	-0.372131677
77	ENST00000352151.9	0.00018412	0.007973959	ENSG00000161791	FMNL3	4.425072838
78	ENST00000380244.7	3.97E-05	0.002996856	ENSG00000089280	FUS	-0.68063217
79	ENST00000487045.6	0.000146328	0.006859265	ENSG00000089280	FUS	0.569644852
80	ENST00000487509.6	0.000207806	0.008691257	ENSG00000089280	FUS	0.33182499
81	ENST00000564766.1	0.002370696	0.043599096	ENSG00000089280	FUS	0.380643605
82	ENST00000415930.7	0.002429136	0.044330456	ENSG00000105220	GPI	-0.326910893
83	ENST00000589985.5	0.001150774	0.02722143	ENSG00000105220	GPI	0.699533447
84	ENST00000434724.6	0.001903284	0.037990516	ENSG00000103342	GSPT1	-0.478025645
85	ENST00000439887.6	0.000880072	0.022898673	ENSG00000103342	GSPT1	0.85916599
86	ENST00000080059.11	0.000810808	0.021628441	ENSG00000061273	HDAC7	0.457128606
87	ENST00000354334.7	0.002578166	0.045979159	ENSG00000061273	HDAC7	-0.704566651
88	ENST00000391975.5	0.000348191	0.012207856	ENSG00000115677	HDLBP	-0.280414053
89	ENST00000391976.6	3.84E-07	0.000221303	ENSG00000115677	HDLBP	0.696599689
90	ENST00000422933.5	0.001284945	0.029247239	ENSG00000115677	HDLBP	3.13977724
91	ENST00000476807.5	0.001808636	0.036766377	ENSG00000115677	HDLBP	3.056435421
92	ENST00000487169.5	0.000555269	0.016667646	ENSG00000115677	HDLBP	0.884616337
93	ENST00000260983.7	1.64E-05	0.001736163	ENSG00000138411	HECW2	-0.720321411
94	ENST00000409111.2	0.000235944	0.009446512	ENSG00000138411	HECW2	0.651790165
95	ENST00000295470.9	1.22E-09	1.76E-05	ENSG00000152795	HNRNPDL	-7.796293545
96	ENST00000349655.8	2.55E-06	0.000600875	ENSG00000152795	HNRNPDL	1.421593067
97	ENST00000602300.5	6.26E-06	0.001026697	ENSG00000152795	HNRNPDL	-0.514141475
98	ENST00000356731.9	0.002546132	0.045720073	ENSG00000169045	HNRNPH1	0.549859406
99	ENST00000393432.8	0.001332657	0.03000202	ENSG00000169045	HNRNPH1	-1.290057672
100	ENST00000504549.5	0.002687609	0.04730935	ENSG00000169045	HNRNPH1	0.258396988
101	ENST00000519943.1	0.000136047	0.006536304	ENSG00000169045	HNRNPH1	0.394637759
102	ENST00000265866.11	0.00217749	0.041224172	ENSG00000096746	HNRNPH3	-0.359264572
103	ENST00000481819.5	6.69E-05	0.004151282	ENSG00000096746	HNRNPH3	0.455820986
104	ENST00000325495.8	1.12E-06	0.00039066	ENSG00000099783	HNRNPM	-0.965247507
105	ENST00000600092.5	0.000680827	0.019256892	ENSG00000099783	HNRNPM	-1.19608723
106	ENST00000600806.5	4.26E-05	0.003137488	ENSG00000099783	HNRNPM	1.502918602
107	ENST00000304858.6	3.13E-05	0.002584992	ENSG00000170606	HSPA4	-0.40076253
108	ENST00000514825.1	0.000343179	0.012083742	ENSG00000170606	HSPA4	1.025127118
109	ENST00000615899.1	0.001004125	0.024904865	ENSG00000170606	HSPA4	0.579019056
110	ENST00000320027.9	9.03E-05	0.005015943	ENSG00000120694	HSPH1	-0.83312983
111	ENST00000626866.2	0.001068585	0.025894932	ENSG00000120694	HSPH1	1.023528065
112	ENST00000403825.7	0.0001367	0.006550293	ENSG00000006652	IFRD1	0.438310527
113	ENST00000429071.5	0.00292542	0.049869023	ENSG00000006652	IFRD1	0.716986406
114	ENST00000621379.4	0.000587865	0.017340477	ENSG00000006652	IFRD1	-4.410380702
115	ENST00000381318.7	2.18E-05	0.002075689	ENSG00000205726	ITSN1	0.413947119
116	ENST00000399352.5	8.17E-07	0.000326285	ENSG00000205726	ITSN1	-1.361631719
117	ENST00000393496.5	0.001906818	0.038031994	ENSG00000160145	KALRN	0.487335011
118	ENST00000483658.1	0.001361844	0.03044303	ENSG00000160145	KALRN	-1.508758466
119	ENST00000297591.9	0.000914882	0.023477381	ENSG00000164944	KIAA1429	-0.367292427
120	ENST00000421249.2	0.000159208	0.007234987	ENSG00000164944	KIAA1429	0.665660674
121	ENST00000348520.10	1.04E-05	0.00132783	ENSG00000126214	KLC1	-0.530591031
122	ENST00000389744.8	0.00048498	0.01518615	ENSG00000126214	KLC1	-0.414421457
123	ENST00000553286.5	0.000323076	0.011629238	ENSG00000126214	KLC1	-0.365799361
124	ENST00000556986.1	0.001526179	0.032779916	ENSG00000126214	KLC1	-0.544593766
125	ENST00000557450.5	0.000517361	0.015888938	ENSG00000126214	KLC1	0.538362018
126	ENST00000274562.13	0.000104786	0.005519145	ENSG00000133706	LARS	0.505395615
127	ENST00000394434.6	3.55E-06	0.000730629	ENSG00000133706	LARS	-0.672759933
128	ENST00000504323.5	0.001275017	0.029071956	ENSG00000133706	LARS	0.844658801
129	ENST00000506231.5	5.77E-06	0.000973429	ENSG00000133706	LARS	0.926996778
130	ENST00000510191.5	0.000115465	0.005885572	ENSG00000133706	LARS	0.746039027
131	ENST00000361308.8	0.000601309	0.017597879	ENSG00000160789	LMNA	0.850429092
132	ENST00000448611.6	0.000935463	0.023795092	ENSG00000160789	LMNA	-3.767966273
133	ENST00000361689.6	0.001016208	0.025053112	ENSG00000127603	MACF1	-0.238235933
134	ENST00000497964.1	0.00096358	0.024266044	ENSG00000127603	MACF1	0.407054661
135	ENST00000530275.2	0.002001943	0.039220366	ENSG00000127603	MACF1	-0.26714736
136	ENST00000350878.8	0.000221556	0.009059411	ENSG00000071054	MAP4K4	-0.671829791
137	ENST00000476609.1	8.31E-05	0.004781733	ENSG00000071054	MAP4K4	0.552548426
138	ENST00000374182.7	0.00098633	0.024648926	ENSG00000107643	MAPK8	-1.349715554
139	ENST00000469110.1	0.000402018	0.013305496	ENSG00000107643	MAPK8	0.773334403
140	ENST00000469879.6	0.002782852	0.048350232	ENSG00000107643	MAPK8	0.391283632
141	ENST00000504045.5	0.001033573	0.025343753	ENSG00000015479	MATR3	-0.473811434
142	ENST00000505625.5	7.52E-05	0.00449973	ENSG00000015479	MATR3	1.03451975
143	ENST00000340941.10	4.58E-05	0.003286958	ENSG00000131844	MCCC2	-0.562128617
144	ENST00000512218.6	0.00118309	0.027759557	ENSG00000131844	MCCC2	1.470789644
145	ENST00000398532.8	0.002224583	0.041782518	ENSG00000188895	MSL1	0.219239858
146	ENST00000577454.5	1.81E-05	0.001844794	ENSG00000188895	MSL1	-0.515527263
147	ENST00000578648.5	0.001463996	0.031886789	ENSG00000188895	MSL1	0.645688672
148	ENST00000474543.5	0.000643235	0.018486506	ENSG00000101158	NELFCD	-0.493979236
149	ENST00000482747.1	0.001547306	0.033107071	ENSG00000101158	NELFCD	0.477572703
150	ENST00000602795.5	5.10E-05	0.003491264	ENSG00000101158	NELFCD	-0.526208186
151	ENST00000232978.12	0.00166792	0.034874088	ENSG00000114857	NKTR	1.039046656
152	ENST00000429888.5	0.00033559	0.011887994	ENSG00000114857	NKTR	-0.692938264
153	ENST00000460807.2	0.001850237	0.037235253	ENSG00000114857	NKTR	0.805147636
154	ENST00000472127.1	0.002062956	0.039866067	ENSG00000114857	NKTR	0.535838389
155	ENST00000498730.5	0.001034413	0.025343753	ENSG00000114857	NKTR	0.425154021
156	ENST00000351718.8	0.002397581	0.043938828	ENSG00000091129	NRCAM	-0.553068281
157	ENST00000379028.7	0.002808024	0.048582352	ENSG00000091129	NRCAM	1.026392718
158	ENST00000413765.6	0.002261109	0.042177758	ENSG00000091129	NRCAM	-0.311477934
159	ENST00000613830.4	6.92E-05	0.004262849	ENSG00000091129	NRCAM	2.048113069
160	ENST00000277120.7	0.000194716	0.008263827	ENSG00000148053	NTRK2	0.594845565
161	ENST00000359847.3	0.000144417	0.00679542	ENSG00000148053	NTRK2	-1.186671952
162	ENST00000323180.10	1.43E-05	0.001610577	ENSG00000135365	PHF21A	0.441228783
163	ENST00000527401.5	1.45E-05	0.00162158	ENSG00000135365	PHF21A	-0.450193659
164	ENST00000502646.1	0.000308321	0.011287568	ENSG00000153404	PLEKHG4B	0.777677028
165	ENST00000637938.1	1.93E-05	0.001912764	ENSG00000153404	PLEKHG4B	-0.426551925
166	ENST00000337537.7	0.0005003	0.015535486	ENSG00000154001	PPP2R5E	-0.519478173
167	ENST00000555899.1	0.002123958	0.040605541	ENSG00000154001	PPP2R5E	0.491569473
168	ENST00000612688.1	0.00032995	0.011760659	ENSG00000275052	PPP4R3B	-0.708636135
169	ENST00000616288.4	0.000330878	0.011772306	ENSG00000275052	PPP4R3B	1.143570657
170	ENST00000616407.1	0.0021392	0.040769349	ENSG00000275052	PPP4R3B	-0.40510038
171	ENST00000393800.6	2.26E-05	0.002111711	ENSG00000110075	PPP6R3	-0.608179676
172	ENST00000524904.5	0.001054957	0.025699806	ENSG00000110075	PPP6R3	1.48988143
173	ENST00000414956.1	0.00035194	0.012314764	ENSG00000226618	PRRC2A	-0.724158406
174	ENST00000432252.1	0.000270638	0.010388599	ENSG00000225748	PRRC2A	-0.6624365
175	ENST00000454306.6	0.002623806	0.046570485	ENSG00000225748	PRRC2A	0.432015872
176	ENST00000458561.6	0.002708842	0.047530625	ENSG00000226618	PRRC2A	0.367613335
177	ENST00000259457.7	0.00111908	0.026732857	ENSG00000136930	PSMB7	-0.257591537
178	ENST00000498485.5	0.001685388	0.03508017	ENSG00000136930	PSMB7	1.41804571
179	ENST00000261712.7	0.001248281	0.028693458	ENSG00000108671	PSMD11	-0.345920597
180	ENST00000457654.6	0.00032334	0.011629238	ENSG00000108671	PSMD11	0.518669408
181	ENST00000493026.2	0.00084245	0.022242883	ENSG00000108671	PSMD11	0.647650247
182	ENST00000463139.5	0.002925965	0.049869023	ENSG00000163636	PSMD6	0.40874134
183	ENST00000467853.5	0.001074232	0.025967518	ENSG00000163636	PSMD6	0.487498264
184	ENST00000482510.5	0.000553117	0.016637048	ENSG00000163636	PSMD6	-4.543271935
185	ENST00000246015.8	0.002174107	0.041182401	ENSG00000125818	PSMF1	-0.669387211
186	ENST00000333082.7	0.00065692	0.018803952	ENSG00000125818	PSMF1	0.462080356
187	ENST00000338910.8	1.53E-05	0.001655332	ENSG00000121390	PSPC1	-1.460953358
188	ENST00000471658.5	0.000261915	0.010166363	ENSG00000121390	PSPC1	0.570213227
189	ENST00000619300.4	2.71E-06	0.000619813	ENSG00000121390	PSPC1	-1.466315647
190	ENST00000375290.6	0.001823281	0.036901304	ENSG00000185920	PTCH1	-0.334143632
191	ENST00000550136.1	0.000116772	0.005921361	ENSG00000185920	PTCH1	1.227957379
192	ENST00000602725.5	2.48E-05	0.002244245	ENSG00000184007	PTP4A2	-0.386423576
193	ENST00000626355.1	0.002299517	0.042589987	ENSG00000184007	PTP4A2	4.527728563
194	ENST00000361752.7	0.000785755	0.021147353	ENSG00000112531	QKI	-0.732258806
195	ENST00000545607.5	0.002598894	0.04624781	ENSG00000112531	QKI	1.003908941
196	ENST00000261973.11	4.27E-05	0.003144831	ENSG00000119707	RBM25	-0.54024997
197	ENST00000527432.5	0.000582185	0.017229248	ENSG00000119707	RBM25	0.458886186
198	ENST00000532683.5	0.00073679	0.020268199	ENSG00000119707	RBM25	0.507857394
199	ENST00000444878.5	4.82E-06	0.000864754	ENSG00000131051	RBM39	1.979627402
200	ENST00000461283.5	1.16E-08	4.32E-05	ENSG00000131051	RBM39	-7.2729391
201	ENST00000463004.5	6.19E-05	0.003936972	ENSG00000131051	RBM39	0.932750454
202	ENST00000492779.5	1.43E-05	0.001605403	ENSG00000131051	RBM39	1.410730037
203	ENST00000394885.7	0.002266226	0.042215561	ENSG00000117906	RCN2	-0.268490654
204	ENST00000558598.1	0.002732366	0.047746148	ENSG00000117906	RCN2	0.346417763
205	ENST00000608991.5	0.000783233	0.021123017	ENSG00000118518	RNF146	-0.322416472
206	ENST00000610153.1	0.000353683	0.012353682	ENSG00000118518	RNF146	0.737304442
207	ENST00000473298.6	0.000362659	0.012522044	ENSG00000255330	RP3-403A15.5	0.364420307
208	ENST00000481848.6	0.000943496	0.023923984	ENSG00000255330	RP3-403A15.5	-0.262024642
209	ENST00000322203.6	0.001784276	0.036412905	ENSG00000198755	RPL10A	-0.195016181
210	ENST00000478340.2	7.43E-05	0.004463665	ENSG00000198755	RPL10A	1.961066159
211	ENST00000216146.8	0.001467583	0.031937373	ENSG00000100316	RPL3	-0.297030329
212	ENST00000420536.1	0.000187361	0.00805007	ENSG00000100316	RPL3	0.915575566
213	ENST00000484615.5	0.000417472	0.01360519	ENSG00000100316	RPL3	0.455505952
214	ENST00000322623.9	1.84E-05	0.00186008	ENSG00000175792	RUVBL1	-0.437065038
215	ENST00000585057.5	0.000480394	0.015085713	ENSG00000175792	RUVBL1	1.177533275
216	ENST00000373236.1	2.03E-05	0.001979431	ENSG00000079332	SAR1A	4.536401783
217	ENST00000373241.8	0.000945128	0.023939893	ENSG00000079332	SAR1A	-0.296231715
218	ENST00000399804.5	0.000738249	0.020289921	ENSG00000156304	SCAF4	0.55631066
219	ENST00000467731.1	4.64E-05	0.003310609	ENSG00000156304	SCAF4	-0.975784073
220	ENST00000447266.6	0.000601847	0.017607055	ENSG00000112701	SENP6	-0.792698759
221	ENST00000476060.2	0.001248487	0.028693458	ENSG00000112701	SENP6	1.229932256
222	ENST00000391971.6	2.84E-06	0.000634682	ENSG00000168385	2-Sep	-0.594398445
223	ENST00000401990.5	0.00223586	0.04193642	ENSG00000168385	2-Sep	1.219128518
224	ENST00000457874.1	0.00126306	0.028912041	ENSG00000168385	2-Sep	0.977903817
225	ENST00000461048.5	6.74E-05	0.004173784	ENSG00000168385	2-Sep	1.188449969
226	ENST00000484167.5	5.74E-05	0.003774565	ENSG00000168385	2-Sep	0.613033958
227	ENST00000484740.1	0.001967113	0.038721974	ENSG00000168385	2-Sep	0.791157397
228	ENST00000267064.8	0.001160386	0.027374975	ENSG00000139613	SMARCC2	-0.905518033
229	ENST00000347471.8	0.000161292	0.007291638	ENSG00000139613	SMARCC2	-0.507872541
230	ENST00000394023.7	0.000151149	0.006981652	ENSG00000139613	SMARCC2	-0.500823477
231	ENST00000550164.5	5.99E-05	0.003863481	ENSG00000139613	SMARCC2	5.154724442
232	ENST00000380285.7	0.000250609	0.009856413	ENSG00000028528	SNX1	-0.443181167
233	ENST00000559844.5	1.64E-05	0.001734256	ENSG00000028528	SNX1	0.535575812
234	ENST00000334121.10	0.000603958	0.017655634	ENSG00000153914	SREK1	-0.559034147
235	ENST00000520580.5	2.94E-05	0.002485965	ENSG00000153914	SREK1	0.786234871
236	ENST00000522912.5	0.00198365	0.038949638	ENSG00000153914	SREK1	0.858014879
237	ENST00000373715.10	0.00171252	0.035428404	ENSG00000112081	SRSF3	-0.468198279
238	ENST00000477442.6	0.002133005	0.040728798	ENSG00000112081	SRSF3	1.045227873
239	ENST00000620941.1	0.002508954	0.045322581	ENSG00000112081	SRSF3	-0.455219017
240	ENST00000383202.6	0.001819306	0.036878009	ENSG00000118007	STAG1	-0.472742951
241	ENST00000629124.2	0.000433531	0.014006175	ENSG00000118007	STAG1	4.370821782
242	ENST00000539345.6	9.78E-06	0.001288394	ENSG00000141556	TBCD	-0.448886547
243	ENST00000571316.5	0.00165971	0.034748788	ENSG00000141556	TBCD	0.785177489
244	ENST00000576996.5	0.001723152	0.035578332	ENSG00000141556	TBCD	-4.09892956
245	ENST00000633959.1	0.002052113	0.03975589	ENSG00000278759	TBCD	-2.988678471
246	ENST00000284290.8	0.002423727	0.044293647	ENSG00000154144	TBRG1	-0.929597872
247	ENST00000530731.5	0.000158598	0.007211447	ENSG00000154144	TBRG1	4.52837283
248	ENST00000477292.5	0.000557457	0.016726915	ENSG00000114126	TFDP2	4.666465992
249	ENST00000499676.5	0.001918217	0.038162197	ENSG00000114126	TFDP2	-1.89403866
250	ENST00000433529.6	8.79E-10	1.76E-05	ENSG00000116001	TIA1	-8.196529827
251	ENST00000495774.1	0.001077179	0.026014673	ENSG00000116001	TIA1	0.707776611
252	ENST00000595527.2	0.000458645	0.014606716	ENSG00000105197	TIMM50	-0.512938493
253	ENST00000601403.5	0.002239901	0.041968666	ENSG00000105197	TIMM50	3.100405776
254	ENST00000559891.1	0.0001749	0.00771976	ENSG00000184277	TM2D3	-0.511341113
255	ENST00000619579.1	2.30E-05	0.002132216	ENSG00000184277	TM2D3	0.882748199
256	ENST00000283943.9	0.001580267	0.033624667	ENSG00000153827	TRIP12	-0.476651524
257	ENST00000389044.8	0.002234414	0.041921155	ENSG00000153827	TRIP12	1.559707216
258	ENST00000039989.8	0.000690176	0.019443319	ENSG00000052841	TTC17	0.317181075
259	ENST00000299240.10	0.000895104	0.023098465	ENSG00000052841	TTC17	-0.9318974
260	ENST00000524936.1	0.000374538	0.012769309	ENSG00000052841	TTC17	0.932439009
261	ENST00000526774.5	0.000207548	0.008690713	ENSG00000052841	TTC17	0.443226468
262	ENST00000399017.6	0.001361228	0.03044303	ENSG00000182670	TTC3	0.540413702
263	ENST00000476784.5	0.000218917	0.00899129	ENSG00000182670	TTC3	-0.428724868
264	ENST00000479930.5	0.000723742	0.020048764	ENSG00000182670	TTC3	0.611776008
265	ENST00000461591.5	0.001399646	0.03101894	ENSG00000163714	U2SURP	0.665262293
266	ENST00000463563.6	2.19E-05	0.00207753	ENSG00000163714	U2SURP	0.632861557
267	ENST00000473835.6	0.000121766	0.006060836	ENSG00000163714	U2SURP	-0.973574315
268	ENST00000480029.5	9.60E-05	0.005212463	ENSG00000163714	U2SURP	0.79742799
269	ENST00000493598.6	1.41E-05	0.001590396	ENSG00000163714	U2SURP	0.602554232
270	ENST00000344836.8	0.00039566	0.013151472	ENSG00000187555	USP7	-0.576198495
271	ENST00000381886.8	8.85E-05	0.004965623	ENSG00000187555	USP7	0.471073842
272	ENST00000563961.5	0.0002703	0.010385794	ENSG00000187555	USP7	0.525178469
273	ENST00000395802.7	3.08E-05	0.002555411	ENSG00000124164	VAPB	0.674681116
274	ENST00000475243.5	0.000367497	0.012611295	ENSG00000124164	VAPB	-0.298650606
275	ENST00000371850.7	0.000638703	0.018417078	ENSG00000160293	VAV2	-0.345518919
276	ENST00000406606.7	4.89E-05	0.003390242	ENSG00000160293	VAV2	0.440323118
277	ENST00000382099.2	0.001581925	0.03365081	ENSG00000147852	VLDLR	0.262099436
278	ENST00000382100.7	0.002630756	0.046651557	ENSG00000147852	VLDLR	-0.314340899
279	ENST00000393077.2	0.001482637	0.032167596	ENSG00000151532	VTI1A	0.314925293
280	ENST00000483122.1	0.000858588	0.022463494	ENSG00000151532	VTI1A	-0.708039133
281	ENST00000358372.8	4.14E-06	0.000799361	ENSG00000146457	WTAP	-0.81962832
282	ENST00000621533.4	0.000175354	0.007731052	ENSG00000146457	WTAP	0.623990018
283	ENST00000392132.6	0.000503211	0.015573221	ENSG00000079246	XRCC5	-0.340326711
284	ENST00000460284.5	4.25E-05	0.003137488	ENSG00000079246	XRCC5	0.747362012
285	ENST00000264447.8	0.000305854	0.011223494	ENSG00000075292	ZNF638	-0.71904489
286	ENST00000410075.5	0.000332321	0.01181294	ENSG00000075292	ZNF638	0.396547212
287	ENST00000475743.1	0.000569326	0.01693958	ENSG00000075292	ZNF638	1.63543335
288	ENST00000336332.5	1.67E-06	0.000493651	ENSG00000070476	ZXDC	0.866184963
289	ENST00000514463.1	1.57E-05	0.001692009	ENSG00000070476	ZXDC	-0.72796727
