# Supplementary material for: Zika infection of neural progenitor cells perturbs transcription in neurodevelopmental pathways
Source: PLoS One. 2017 Apr 27;12(4):e0175744. doi: 10.1371/journal.pone.0175744 (PMC5407828; doi:10.1371/journal.pone.0175744)
Supplement: S4 Table — (XLS) [file pone.0175744.s004.xls]

## Sheet: ClueGO Results
GOID	GOTerm	Ontology Source	Term PValue	Term PValue Corrected with Bonferroni step down	Group PValue	Group PValue Corrected with Bonferroni step down	GOLevels	GOGroups	% Associated Genes	Nr. Genes	Associated Genes Found
GO:0007017	microtubule-based process	GO_BiologicalProcess-GOA_09.02.2016_16h18	5e-11	2.9e-08	2.6e-09	9.6e-08	[3]	Group0	29.4953	187	[AK7, AP3B1, AP3D1, AP3M2, APEX1, APP, ARHGAP21, ARL2, ARL3, ASPM, ATF5, AURKA, AURKB, BBS12, BIRC5, BLOC1S1, BLOC1S2, BNIP2, BORA, BRCA1, BRCA2, C2CD3, CCDC40, CCNB1, CCSER2, CDK1, CDK2, CDK5R1, CDK5RAP2, CDKN1B, CELSR2, CENPE, CEP135, CEP152, CEP192, CEP57, CEP63, CEP85, CFAP46, CHMP3, CHORDC1, CHP1, CKAP2, CKAP5, CLASP2, CNP, CNTN2, COPG1, CROCCP3, DAG1, DCTN6, DIAPH1, DLG1, DLGAP5, DST, DYNLL…
GO:0007010	cytoskeleton organization	GO_BiologicalProcess-GOA_09.02.2016_16h18	1e-08	6e-06	2.6e-09	9.6e-08	[4]	Group0	25.5004	293	[ABI1, ABL2, ACTC1, ACTG1, ADD1, AGFG1, AK7, ANK3, ANLN, ANTXR1, ARF1, ARFGEF1, ARFIP2, ARHGAP21, ARHGEF11, ARL2, ARPC4, ARPIN, ASPM, ATF5, ATP2C1, AURKA, AURKB, BAIAP2, BAIAP2L1, BCL2, BCL6, BCR, BIRC5, BLOC1S2, BNIP2, BORA, BRAF, BRCA1, BRCA2, BRK1, BUD31, C21orf2, C2CD3, CALR, CAMSAP1, CAPN2, CAPZA1, CCDC40, CCNB1, CCSER2, CDC42BPB, CDC42EP1, CDC42EP2, CDK1, CDK2, CDK5R1, CDK5RAP2, CDKN1B, CEC…
GO:0000226	microtubule cytoskeleton organization	GO_BiologicalProcess-GOA_09.02.2016_16h18	1.7e-10	1e-07	2.6e-09	9.6e-08	[4, 5]	Group0	31.2088	142	[AK7, ARL2, ASPM, ATF5, AURKA, AURKB, BIRC5, BLOC1S2, BNIP2, BORA, BRCA1, BRCA2, C2CD3, CCDC40, CCNB1, CCSER2, CDK1, CDK2, CDK5R1, CDK5RAP2, CDKN1B, CENPE, CEP135, CEP152, CEP192, CEP57, CEP63, CEP85, CFAP46, CHMP3, CHORDC1, CHP1, CKAP2, CKAP5, CLASP2, CNP, CNTN2, CROCCP3, DAG1, DCTN6, DLG1, DST, DYNLT1, ESPL1, EZR, FAM175B, FBXW5, FGFR1OP, FKBP4, FLNA, GADD45A, GAS2L3, GEN1, GOLGA2, HAUS1, HAUS6…
GO:0031023	microtubule organizing center organization	GO_BiologicalProcess-GOA_09.02.2016_16h18	1.2e-08	7.1e-06	2.6e-09	9.6e-08	[4, 5, 6]	Group0	41.3223	50	[ARL2, ATF5, AURKA, BNIP2, BRCA1, BRCA2, C2CD3, CDK1, CDK2, CDK5RAP2, CEP135, CEP152, CEP192, CEP63, CEP85, CHMP3, CHORDC1, CKAP5, CLASP2, CROCCP3, FBXW5, GADD45A, GEN1, GOLGA2, HAUS1, HAUS6, KIF11, MBD1, NDE1, NDEL1, NPM1, NUBP1, OFD1, PAFAH1B1, PCM1, PLK1, PLK2, PPP1R12A, RANBP1, RBM14, ROCK2, SLC16A1, SSX2IP, TUBE1, USP33, UVRAG, WDR43, WDR62, XPO1, XRCC2]
GO:0032502	developmental process	GO_BiologicalProcess-GOA_09.02.2016_16h18	8.1e-08	4.3e-05	1.2e-06	2.2e-05	[1]	Group1	21.0322	1300	[AARS, ABCA1, ABCC4, ABHD5, ABI1, ABL2, ACD, ACSL3, ACTA2, ACTB, ACTC1, ACTG1, ACVR1, ACVR1B, ACVR2B, ADAM10, ADAM12, ADAM19, ADAMTS12, ADAMTS18, ADAMTS7, ADAMTS9, ADCY6, ADD1, ADGRV1, ADM2, ADNP, ADRBK1, AFF3, AFF4, AGFG1, AGRN, AHI1, AK2, AK7, AKAP6, AKIRIN2, AKR1B1, AKT2, ALDH5A1, ALKBH5, ALPK3, AMFR, ANGPTL2, ANK3, ANKRD11, ANKS6, ANLN, ANOS1, ANTXR1, AP1G1, AP3B1, AP3D1, APBA2, APBB1, APCDD1…
GO:0044767	single-organism developmental process	GO_BiologicalProcess-GOA_09.02.2016_16h18	2e-08	1.1e-05	1.2e-06	2.2e-05	[2]	Group1	21.1485	1289	[AARS, ABCA1, ABCC4, ABHD5, ABI1, ABL2, ACD, ACSL3, ACTA2, ACTB, ACTC1, ACTG1, ACVR1, ACVR1B, ACVR2B, ADAM10, ADAM12, ADAM19, ADAMTS12, ADAMTS18, ADAMTS7, ADAMTS9, ADCY6, ADD1, ADGRV1, ADM2, ADNP, ADRBK1, AFF3, AFF4, AGFG1, AGRN, AHI1, AK2, AK7, AKAP6, AKIRIN2, AKR1B1, AKT2, ALDH5A1, ALKBH5, ALPK3, AMFR, ANGPTL2, ANK3, ANKRD11, ANKS6, ANLN, ANOS1, ANTXR1, AP1G1, AP3B1, AP3D1, APBA2, APBB1, APCDD1…
GO:0048856	anatomical structure development	GO_BiologicalProcess-GOA_09.02.2016_16h18	3.9e-08	2.1e-05	1.2e-06	2.2e-05	[2]	Group1	21.2897	1172	[AARS, ABCC4, ABI1, ABL2, ACD, ACSL3, ACTA2, ACTB, ACTC1, ACTG1, ACVR1, ACVR1B, ACVR2B, ADAM10, ADAM12, ADAM19, ADAMTS12, ADAMTS18, ADAMTS7, ADCY6, ADD1, ADGRV1, ADM2, ADNP, ADRBK1, AFF3, AFF4, AGFG1, AGRN, AHI1, AK2, AK7, AKAP6, AKIRIN2, AKR1B1, AKT2, ALDH5A1, ALPK3, ANK3, ANKRD11, ANKS6, ANLN, ANOS1, ANTXR1, AP3B1, AP3D1, APBA2, APBB1, APCDD1, APEX1, APLP2, APP, ARCN1, ARF1, ARFGEF1, ARHGAP11B,…
GO:0009653	anatomical structure morphogenesis	GO_BiologicalProcess-GOA_09.02.2016_16h18	8.9e-09	5e-06	1.2e-06	2.2e-05	[2, 3]	Group1	22.6908	678	[ABCC4, ABI1, ABL2, ACD, ACTA2, ACTB, ACTC1, ACTG1, ACVR1, ACVR2B, ADAM10, ADAM12, ADAMTS12, ADD1, ADM2, ADNP, AFF3, AGFG1, AGRN, AHI1, AK7, AKR1B1, ANK3, ANKRD11, ANOS1, ANTXR1, APBB1, APEX1, APP, ARHGAP39, ARHGEF1, ARHGEF11, ARID1A, ARID5B, ARL3, ARPC4, ARPIN, ASXL1, ATF2, ATP5B, ATXN2, AURKA, B4GALT1, B9D1, BAIAP2, BAMBI, BBIP1, BBS10, BBS7, BCL2, BCL6, BCL9L, BCR, BHLHE41, BMP2, BMP7, BNIP3, …
GO:0050793	regulation of developmental process	GO_BiologicalProcess-GOA_09.02.2016_16h18	2.3e-06	0.0011	1.2e-06	2.2e-05	[2, 3]	Group1	22.5249	521	[ABCA1, ABL2, ACVR1, ACVR1B, ACVR2B, ADAMTS12, ADAMTS7, ADCY6, ADGRV1, ADM2, ADNP, AGRN, AHI1, AKAP6, AKR1B1, AP3B1, AP3D1, APBB1, APEX1, APP, ARF1, ARHGEF1, ARID4A, ARPIN, ARSB, ASCL1, ASPM, ASXL1, ATF5, ATP6AP1, ATRAID, ATRN, ATXN1L, ATXN2, AURKA, B4GALT1, BAIAP2, BAMBI, BBS12, BCL2, BCL6, BCL9L, BCR, BHLHE41, BMP2, BMP7, BNIP2, BNIP3, BRAF, BRCA1, BRCA2, BRINP2, BUD31, C21orf2, C5, CA2, CACNA1…
GO:0006928	movement of cell or subcellular component	GO_BiologicalProcess-GOA_09.02.2016_16h18	4.4e-05	0.019	1.2e-06	2.2e-05	[3]	Group1	22.2384	459	[ABI1, ABL2, ACTB, ACTC1, ACTG1, ACVR1, ACVR1B, ADAM10, ADAMTS12, ADCY3, AGRN, AK7, AKT2, AMFR, ANK3, ANLN, ANOS1, AP3B1, AP3D1, AP3M2, APCDD1, APEX1, APP, ARFIP2, ARHGAP21, ARHGAP39, ARHGAP5, ARHGEF11, ARHGEF39, ARID5B, ARL3, ARPC4, ARPIN, ARSB, ASCL1, ASPM, ASTN1, ATP1B3, ATP2A2, ATP5B, B4GALT1, BAMBI, BBS12, BCL2, BCL6, BCR, BLOC1S1, BLOC1S2, BMP2, BMP7, BRAF, BRAT1, BRK1, BUD31, C5, C6orf89, …
GO:0007275	multicellular organismal development	GO_BiologicalProcess-GOA_09.02.2016_16h18	1.2e-07	6.5e-05	1.2e-06	2.2e-05	[3]	Group1	21.2815	1116	[AARS, ABI1, ABL2, ACD, ACSL3, ACTA2, ACTB, ACTC1, ACTG1, ACVR1, ACVR1B, ACVR2B, ADAM10, ADAM19, ADAMTS12, ADAMTS18, ADAMTS7, ADAMTS9, ADCY6, ADD1, ADGRV1, ADM2, ADNP, ADRBK1, AFF3, AGFG1, AGRN, AHI1, AK2, AK7, AKAP6, AKIRIN2, AKR1B1, AKT2, ALDH5A1, ALPK3, ANGPTL2, ANK3, ANKRD11, ANKS6, ANLN, ANOS1, ANTXR1, AP3B1, AP3D1, APBA2, APBB1, APCDD1, APEX1, APLP2, APP, ARCN1, ARF1, ARFGEF1, ARHGAP11B, AR…
GO:0030030	cell projection organization	GO_BiologicalProcess-GOA_09.02.2016_16h18	5.6e-11	3.3e-08	1.2e-06	2.2e-05	[3]	Group1	25.0914	412	[ABCC4, ABI1, ABL2, ACTB, ACTG1, ADAM10, ADCY6, ADNP, AGRN, AHI1, AK7, ANK3, ANOS1, APBB1, APEX1, APP, ARF1, ARFGEF1, ARFIP2, ARHGAP39, ARHGEF1, ARHGEF11, ARHGEF6, ARL3, ARPC4, ARPIN, ARSB, ATCAY, ATXN2, AURKA, B9D1, BAIAP2, BBIP1, BBS10, BBS12, BBS7, BCL2, BLOC1S1, BLOC1S2, BMP7, BRAF, BRK1, BTG2, BUD31, C21orf2, C21orf59, C2CD3, C6orf89, CACNA1C, CAMK1D, CAMK2D, CAMSAP1, CCDC40, CDC20, CDC42EP1…
GO:0048869	cellular developmental process	GO_BiologicalProcess-GOA_09.02.2016_16h18	5.4e-08	2.9e-05	1.2e-06	2.2e-05	[3]	Group1	21.722	936	[ABCA1, ABCC4, ABHD5, ABI1, ABL2, ACD, ACTA2, ACTB, ACTC1, ACTG1, ACVR1, ACVR1B, ACVR2B, ADAM10, ADAM12, ADAMTS12, ADAMTS7, ADCY6, ADD1, ADGRV1, ADNP, AFF4, AGFG1, AGRN, AHI1, AK7, AKAP6, AKR1B1, AKT2, ALKBH5, ALPK3, ANK3, ANLN, ANOS1, ANTXR1, AP1G1, AP3B1, AP3D1, APBB1, APCDD1, APEX1, APP, ARF1, ARFGEF1, ARHGAP39, ARHGEF1, ARHGEF11, ARID1A, ARID4A, ARID5B, ARIH2, ARL3, ARPC4, ARPIN, ARSB, ASCL1,…
GO:0032989	cellular component morphogenesis	GO_BiologicalProcess-GOA_09.02.2016_16h18	1.5e-09	8.7e-07	1.2e-06	2.2e-05	[3, 4]	Group1	24.5115	414	[ABCC4, ABI1, ABL2, ACTB, ACTC1, ACTG1, ADAM10, ADD1, ADNP, AGFG1, AGRN, AHI1, AK7, AKR1B1, ANK3, ANOS1, ANTXR1, APBB1, APEX1, APP, ARHGAP39, ARHGEF1, ARHGEF11, ARL3, ARPC4, ARPIN, ATXN2, AURKA, B9D1, BAIAP2, BAMBI, BBIP1, BBS10, BBS7, BCL2, BCL6, BCL9L, BMP2, BMP7, BRAF, BUD31, C1GALT1C1, C21orf2, C21orf59, C2CD3, C6orf89, CACNA1C, CALR, CAMK2D, CAMSAP1, CASC5, CCDC40, CDC42EP1, CDC42EP2, CDC42S…
GO:0048731	system development	GO_BiologicalProcess-GOA_09.02.2016_16h18	6.5e-08	3.4e-05	1.2e-06	2.2e-05	[3, 4]	Group1	21.5447	1007	[AARS, ABI1, ABL2, ACD, ACSL3, ACTA2, ACTB, ACTC1, ACTG1, ACVR1, ACVR1B, ACVR2B, ADAM10, ADAM19, ADAMTS12, ADAMTS18, ADAMTS7, ADCY6, ADD1, ADGRV1, ADM2, ADNP, ADRBK1, AGRN, AHI1, AK2, AK7, AKAP6, AKR1B1, AKT2, ALDH5A1, ALPK3, ANK3, ANKRD11, ANKS6, ANLN, ANOS1, AP3B1, AP3D1, APBA2, APBB1, APCDD1, APEX1, APLP2, APP, ARCN1, ARF1, ARFGEF1, ARHGAP11B, ARHGAP39, ARHGAP5, ARHGEF1, ARHGEF11, ARID1A, ARID…
GO:2000026	regulation of multicellular organismal development	GO_BiologicalProcess-GOA_09.02.2016_16h18	2.9e-05	0.013	1.2e-06	2.2e-05	[3, 4]	Group1	22.7299	388	[ABL2, ACVR1, ACVR1B, ACVR2B, ADAMTS12, ADAMTS7, ADCY6, ADM2, ADNP, AGRN, AHI1, AKAP6, AKR1B1, AP3B1, AP3D1, APBB1, APEX1, APP, ARF1, ARHGEF1, ARID4A, ARSB, ASCL1, ASPM, ATF5, ATP6AP1, ATRAID, ATXN1L, B4GALT1, BAIAP2, BAMBI, BCL2, BCL6, BCL9L, BMP2, BMP7, BNIP2, BRAF, BRCA1, BRCA2, BRINP2, BUD31, C5, CA2, CALR, CAMK1D, CBLB, CCNB1, CCND1, CD276, CD46, CDC20, CDH2, CDH4, CDK1, CDK5R1, CDK5RAP2, CD…
GO:0030154	cell differentiation	GO_BiologicalProcess-GOA_09.02.2016_16h18	8.8e-07	0.00043	1.2e-06	2.2e-05	[4]	Group1	21.5706	868	[ABCA1, ABHD5, ABI1, ABL2, ACD, ACTA2, ACTB, ACTC1, ACTG1, ACVR1, ACVR1B, ACVR2B, ADAM10, ADAM12, ADAMTS12, ADAMTS7, ADCY6, ADD1, ADGRV1, ADNP, AFF4, AGFG1, AGRN, AHI1, AKAP6, AKR1B1, AKT2, ALKBH5, ALPK3, ANK3, ANLN, ANOS1, ANTXR1, AP1G1, AP3B1, AP3D1, APBB1, APCDD1, APEX1, APP, ARF1, ARFGEF1, ARHGAP39, ARHGEF1, ARHGEF11, ARID1A, ARID4A, ARID5B, ARIH2, ARL3, ARPC4, ARSB, ASCL1, ASF1B, ASPM, ASTN1…
GO:0045595	regulation of cell differentiation	GO_BiologicalProcess-GOA_09.02.2016_16h18	5.3e-07	0.00027	1.2e-06	2.2e-05	[3, 4, 5]	Group1	23.6694	378	[ABCA1, ABL2, ACVR1, ACVR1B, ACVR2B, ADAMTS12, ADAMTS7, ADCY6, ADGRV1, ADNP, AHI1, AKAP6, AKR1B1, AP3B1, AP3D1, APBB1, APEX1, APP, ARF1, ARHGEF1, ARID4A, ARSB, ASCL1, ASPM, ASXL1, ATF5, ATP6AP1, ATRAID, AURKA, B4GALT1, BAIAP2, BAMBI, BBS12, BCL2, BCL6, BCL9L, BHLHE41, BMP2, BMP7, BNIP2, BRAF, BRINP2, BUD31, CA2, CALR, CAMK1D, CCND1, CD276, CD46, CDC20, CDH2, CDH4, CDK1, CDK5R1, CDK5RAP2, CEBPB, C…
GO:0048468	cell development	GO_BiologicalProcess-GOA_09.02.2016_16h18	1.4e-07	7.7e-05	1.2e-06	2.2e-05	[3, 4, 5]	Group1	22.8972	539	[ABI1, ABL2, ACTA2, ACTB, ACTC1, ACTG1, ACVR1, ADAM10, ADCY6, ADNP, AFF4, AGFG1, AGRN, AHI1, AKAP6, AKR1B1, AKT2, ALPK3, ANK3, ANOS1, ANTXR1, APBB1, APEX1, APP, ARF1, ARFGEF1, ARHGAP39, ARHGEF1, ARHGEF11, ARID4A, ARID5B, ARIH2, ARL3, ARPC4, ARSB, ASCL1, ASPM, ATCAY, ATF5, ATP2A2, ATP6AP1, ATXN2, AURKA, B4GALT1, BAIAP2, BAMBI, BCL2, BCL6, BCL9L, BLOC1S1, BLOC1S2, BMP2, BMP7, BNIP2, BRAF, BRCA2, BR…
GO:0000902	cell morphogenesis	GO_BiologicalProcess-GOA_09.02.2016_16h18	4.2e-09	2.4e-06	1.2e-06	2.2e-05	[4, 5]	Group1	24.5025	394	[ABCC4, ABI1, ABL2, ACTB, ACTG1, ADAM10, ADD1, ADNP, AGRN, AHI1, AK7, AKR1B1, ANK3, ANOS1, ANTXR1, APBB1, APEX1, APP, ARHGAP39, ARHGEF1, ARHGEF11, ARL3, ARPC4, ARPIN, ATXN2, AURKA, B9D1, BAIAP2, BAMBI, BBIP1, BBS10, BBS7, BCL2, BCL6, BCL9L, BMP2, BMP7, BRAF, BUD31, C1GALT1C1, C21orf2, C21orf59, C2CD3, C6orf89, CACNA1C, CALR, CAMK2D, CAMSAP1, CCDC40, CDC42EP1, CDC42EP2, CDC42SE1, CDH11, CDH2, CDH4…
GO:0007399	nervous system development	GO_BiologicalProcess-GOA_09.02.2016_16h18	5e-13	3e-10	1.2e-06	2.2e-05	[4, 5]	Group1	24.1797	619	[AARS, ABL2, ACD, ACSL3, ACTB, ACTG1, ACVR1B, ADAM10, ADCY6, ADGRV1, ADNP, AGRN, AHI1, AK2, AK7, AKT2, ALDH5A1, ANK3, ANOS1, APBA2, APBB1, APCDD1, APEX1, APLP2, APP, ARCN1, ARF1, ARFGEF1, ARHGAP11B, ARHGAP39, ARHGEF1, ARHGEF11, ARID1A, ARL3, ARNT2, ARPC4, ARSB, ASCL1, ASPM, ASTN1, ATCAY, ATF5, ATRN, ATXN2, AURKA, BAG3, BAIAP2, BBS7, BCL2, BCL6, BCR, BEX1, BLOC1S1, BLOC1S2, BMP2, BMP7, BNIP2, BOK,…
GO:0032990	cell part morphogenesis	GO_BiologicalProcess-GOA_09.02.2016_16h18	2.4e-09	1.4e-06	1.2e-06	2.2e-05	[4, 5]	Group1	25.5302	313	[ABCC4, ABI1, ABL2, ACTB, ACTG1, ADAM10, ADNP, AGRN, AHI1, AK7, ANK3, ANOS1, APBB1, APEX1, APP, ARHGAP39, ARHGEF1, ARHGEF11, ARL3, ARPC4, ARPIN, ATXN2, AURKA, B9D1, BAIAP2, BBIP1, BBS10, BBS7, BCL2, BMP7, BRAF, C21orf2, C21orf59, C2CD3, C6orf89, CACNA1C, CAMK2D, CCDC40, CDH11, CDH2, CDH4, CDK5R1, CELSR2, CELSR3, CEP89, CFAP46, CHRNA3, CIT, CLASP2, CNP, CNTN2, CNTNAP1, COL2A1, COL4A1, COL4A2, COL5…
GO:0000904	cell morphogenesis involved in differentiation	GO_BiologicalProcess-GOA_09.02.2016_16h18	5.5e-08	2.9e-05	1.2e-06	2.2e-05	[4, 5, 6]	Group1	25.1982	286	[ABL2, ACTB, ACTG1, ADAM10, ADNP, AGRN, AKR1B1, ANK3, ANOS1, ANTXR1, APBB1, APP, ARHGAP39, ARHGEF1, ARHGEF11, ARPC4, BAIAP2, BAMBI, BCL2, BCL9L, BMP2, BMP7, BRAF, C1GALT1C1, C6orf89, CACNA1C, CALR, CAMK2D, CDH11, CDH2, CDH4, CDK5R1, CELSR2, CHRNA3, CIT, CLASP2, CNP, CNTN2, CNTNAP1, COL18A1, COL1A1, COL2A1, COL4A1, COL4A2, COL5A1, COL9A1, CORO1C, CRB2, CSNK2A1, CTNNA2, CTTN, CUL3, CXCL12, CYFIP1, …
GO:0007417	central nervous system development	GO_BiologicalProcess-GOA_09.02.2016_16h18	6.9e-09	3.9e-06	1.2e-06	2.2e-05	[4, 5, 6]	Group1	26.0274	266	[AARS, ABL2, ACD, ACSL3, ACTB, ACVR1B, AHI1, AK2, AK7, ALDH5A1, APEX1, APLP2, APP, ARCN1, ARHGAP11B, ARID1A, ARNT2, ARSB, ASCL1, ASPM, ATF5, ATRN, ATXN2, BAG3, BBS7, BCL2, BCR, BMP2, BOK, BRCA1, BRCA2, BTG2, BUD31, C2CD3, CAST, CCDC14, CCDC85C, CDH11, CDH2, CDK5R1, CDK5R2, CDK5RAP2, CDKN2C, CELSR1, CELSR2, CENPF, CITED2, CLN5, CLP1, CNP, CNTN2, COL2A1, COL4A1, COX7B, CST3, CTNNA2, CTNS, CXCL12, D…
GO:0022604	regulation of cell morphogenesis	GO_BiologicalProcess-GOA_09.02.2016_16h18	3.7e-05	0.016	1.2e-06	2.2e-05	[4, 5, 6]	Group1	25.7785	149	[ADNP, APEX1, ARHGEF1, ARPIN, BAIAP2, BAMBI, BCL9L, BMP2, BRAF, BUD31, C21orf2, CALR, CAMSAP1, CDC42EP1, CDC42EP2, CDC42SE1, CDH2, CDH4, CDK5R1, CHRNA3, CIT, CLASP2, CNTN2, COL1A1, CORO1C, CRB2, CTTN, CXCL12, CYFIP1, DAG1, DAPK3, DIAPH1, DLG1, DNM2, DRAXIN, DYNLL1, EEF2K, EPHA4, EPHA7, EVI5L, EZR, FLNA, FMNL3, GAS7, GCNT2, GSK3B, HDAC2, HNRNPK, HTT, IFRD1, ITGB1BP1, KCTD17, KIT, L1CAM, LARP4, LDL…
GO:0048858	cell projection morphogenesis	GO_BiologicalProcess-GOA_09.02.2016_16h18	3.6e-09	2e-06	1.2e-06	2.2e-05	[4, 5, 6]	Group1	25.539	308	[ABCC4, ABI1, ABL2, ACTB, ACTG1, ADAM10, ADNP, AGRN, AHI1, AK7, ANK3, ANOS1, APBB1, APEX1, APP, ARHGAP39, ARHGEF1, ARHGEF11, ARL3, ARPC4, ARPIN, ATXN2, AURKA, B9D1, BAIAP2, BBIP1, BBS10, BBS7, BCL2, BMP7, BRAF, C21orf2, C21orf59, C2CD3, C6orf89, CACNA1C, CAMK2D, CCDC40, CDH11, CDH2, CDH4, CDK5R1, CELSR2, CELSR3, CEP89, CFAP46, CHRNA3, CIT, CLASP2, CNP, CNTN2, CNTNAP1, COL2A1, COL4A1, COL4A2, COL5…
GO:0051960	regulation of nervous system development	GO_BiologicalProcess-GOA_09.02.2016_16h18	4.9e-07	0.00024	1.2e-06	2.2e-05	[4, 5, 6]	Group1	25.894	210	[ABL2, ADCY6, ADNP, AGRN, APBB1, APEX1, APP, ARF1, ARHGEF1, ARSB, ASCL1, ASPM, ATF5, BAIAP2, BCL2, BCL6, BMP2, BMP7, BNIP2, BRAF, BRINP2, BUD31, CALR, CAMK1D, CDC20, CDH2, CDH4, CDK1, CDK5R1, CDK5RAP2, CELSR1, CHRNA3, CIT, CLASP2, CLSTN2, CNTN2, COLQ, CPNE1, CRTC1, CTTN, CXCL12, CYB5D2, DGUOK, DLG1, DLL1, DLL3, DLL4, DMD, DMRTA2, DNM2, DPYSL3, DRAXIN, DYNLT1, EEF2K, EIF2AK3, EOMES, EPHA4, EPHA7, …
GO:0060284	regulation of cell development	GO_BiologicalProcess-GOA_09.02.2016_16h18	4.7e-07	0.00024	1.2e-06	2.2e-05	[4, 5, 6]	Group1	25.5249	231	[ABL2, ADCY6, ADNP, AKAP6, APBB1, APEX1, APP, ARF1, ARHGEF1, ARSB, ASCL1, ASPM, ATF5, ATP6AP1, AURKA, B4GALT1, BAIAP2, BAMBI, BCL2, BCL6, BCL9L, BMP2, BMP7, BNIP2, BRAF, BRINP2, BUD31, CALR, CAMK1D, CDC20, CDH2, CDH4, CDK1, CDK5R1, CDK5RAP2, CHRNA3, CIT, CLASP2, CNOT1, CNOT3, CNTN2, COL1A1, CORO1C, CPNE1, CRB2, CRTC1, CTTN, CXCL12, CYB5D2, DAG1, DDX39B, DGUOK, DLL1, DLL3, DLL4, DMD, DMRTA2, DNM2,…
GO:0048666	neuron development	GO_BiologicalProcess-GOA_09.02.2016_16h18	1.8e-08	9.9e-06	1.2e-06	2.2e-05	[4, 5, 6, 8, 9]	Group1	24.8148	335	[ABL2, ACTB, ACTG1, ADAM10, ADCY6, ADNP, AGRN, AHI1, ANK3, ANOS1, APBB1, APP, ARF1, ARFGEF1, ARHGAP39, ARHGEF1, ARHGEF11, ARL3, ARPC4, ARSB, ASCL1, ATCAY, ATF5, ATXN2, AURKA, BAIAP2, BCL2, BLOC1S1, BLOC1S2, BMP7, BRAF, BTG2, BUD31, C6orf89, CACNA1C, CAMK1D, CAMK2D, CAMSAP1, CCDC66, CDC20, CDH11, CDH2, CDH4, CDK16, CDK5R1, CECR2, CELSR2, CELSR3, CHRNA3, CIT, CLASP2, CLN5, CNGB1, CNP, CNTN2, CNTNAP…
GO:0031175	neuron projection development	GO_BiologicalProcess-GOA_09.02.2016_16h18	3.3e-09	1.8e-06	1.2e-06	2.2e-05	[4, 5, 6, 7, 9, 10]	Group1	25.5639	306	[ABL2, ACTB, ACTG1, ADAM10, ADCY6, ADNP, AGRN, ANK3, ANOS1, APBB1, APP, ARF1, ARFGEF1, ARHGAP39, ARHGEF1, ARHGEF11, ARPC4, ARSB, ATCAY, ATXN2, AURKA, BAIAP2, BCL2, BLOC1S1, BLOC1S2, BMP7, BRAF, BTG2, BUD31, C6orf89, CACNA1C, CAMK1D, CAMK2D, CAMSAP1, CDC20, CDH11, CDH2, CDH4, CDK16, CDK5R1, CELSR2, CELSR3, CHRNA3, CIT, CLASP2, CNP, CNTN2, CNTNAP1, COL2A1, COL4A1, COL4A2, COL5A1, COL9A1, CPNE1, CRT…
GO:0097485	neuron projection guidance	GO_BiologicalProcess-GOA_09.02.2016_16h18	5.7e-06	0.0027	1.2e-06	2.2e-05	[4, 5, 6, 7, 8, 9, 11, 12]	Group1	26.2215	161	[ABL2, ACTB, ACTG1, ADAM10, AGRN, ANK3, ANOS1, APP, ARHGAP39, ARHGEF11, ARPC4, BMP7, BRAF, C6orf89, CACNA1C, CAMK2D, CDH4, CDK5R1, CLASP2, CNTN2, CNTNAP1, COL2A1, COL4A1, COL4A2, COL5A1, COL9A1, CSNK2A1, CUL3, CXCL12, DAG1, DDX11, DLG1, DLG3, DNM1, DPYSL3, DPYSL4, DPYSL5, DRAXIN, DUSP6, DUSP7, EFNA3, EFNA4, EFNB3, EGR2, EPHA2, EPHA4, EPHA7, EPHB1, EPHB2, ETV1, EZR, FEZ1, FEZF1, FGF9, FGFR1, FGFR3…
GO:0009056	catabolic process	GO_BiologicalProcess-GOA_09.02.2016_16h18	1e-08	5.7e-06	1e-08	3.4e-07	[2]	Group10	23.2906	545	[AASS, ABCD3, ABHD12, ABHD4, ABHD5, ABL2, ACAD11, ACAD8, ACD, ADAM10, ADAMTS12, ADAMTS3, ADAMTS7, ADAMTS9, ADH5, ADPGK, AGO3, AGRN, AHCY, AKT2, ALDH1L2, ALDH5A1, ALDH7A1, AMFR, ANAPC1, ANAPC15, ANAPC5, ARIH1, ARIH2, ARSB, ATCAY, ATG2A, ATG2B, ATG4B, ATG4D, ATRAID, AUP1, AURKA, AURKB, BBS7, BCAT1, BCKDHB, BCL2, BDH2, BLOC1S1, BNIP2, BNIP3, BSCL2, BTG2, BUB1, BUB1B, BUB3, C18orf25, C19orf68, C5, CA…
GO:0044248	cellular catabolic process	GO_BiologicalProcess-GOA_09.02.2016_16h18	3.1e-08	1.7e-05	1e-08	3.4e-07	[3]	Group10	23.8414	427	[AASS, ABCD3, ABHD12, ABHD5, ABL2, ACAD11, ACAD8, ACD, ADAMTS12, ADAMTS7, ADAMTS9, ADH5, AGO3, AHCY, AKT2, ALDH1L2, ALDH5A1, ALDH7A1, AMFR, ANAPC1, ANAPC15, ANAPC5, ARIH1, ARIH2, ARSB, ATCAY, ATRAID, AUP1, AURKA, AURKB, BBS7, BCAT1, BCKDHB, BCL2, BDH2, BNIP2, BNIP3, BTG2, BUB1, BUB1B, BUB3, C18orf25, C19orf68, CAPN2, CCAR2, CCNB1, CDC16, CDC20, CDC23, CDK1, CDK2, CECR2, CENPF, CLN6, CLPX, CNOT1, …
GO:1901575	organic substance catabolic process	GO_BiologicalProcess-GOA_09.02.2016_16h18	9.3e-08	4.9e-05	1e-08	3.4e-07	[3]	Group10	23.4536	455	[AASS, ABCD3, ABHD12, ABHD4, ABHD5, ACAD11, ACAD8, ACD, ADAMTS12, ADAMTS7, ADAMTS9, ADH5, ADPGK, AGO3, AGRN, AHCY, AKT2, ALDH1L2, ALDH5A1, ALDH7A1, AMFR, ANAPC1, ANAPC15, ANAPC5, ARIH1, ARIH2, ARSB, ATCAY, ATG4B, ATRAID, AUP1, AURKA, AURKB, BBS7, BCAT1, BCKDHB, BDH2, BNIP2, BNIP3, BSCL2, BTG2, BUB1, BUB1B, BUB3, C18orf25, C19orf68, CAPN2, CBLB, CCAR2, CCNB1, CDC16, CDC20, CDC23, CDK1, CDK2, CDKN1…
GO:0009894	regulation of catabolic process	GO_BiologicalProcess-GOA_09.02.2016_16h18	7.2e-08	3.8e-05	1e-08	3.4e-07	[3, 4]	Group10	26.9177	193	[ABHD5, ABL2, AKT2, ANAPC1, ANAPC15, ANAPC5, ARIH1, ARIH2, ATG4B, ATRAID, AURKA, BBS7, BCL2, BNIP3, BSCL2, BTG2, BUB1, BUB1B, BUB3, CBLB, CCAR2, CCNB1, CDC16, CDC20, CDC23, CDK1, CDKN1B, CENPF, CNOT1, CPAMD8, CPT1A, CREBRF, CSNK1A1, CSNK1E, CSNK2A1, CST3, CTSC, CTTN, CUL3, DACT1, DAPK3, DDIT4, DDRGK1, DERL2, DLGAP5, DNAJB2, DRAM2, DUSP1, EDEM1, EEF1A2, ERN1, ESPL1, EZR, FBXO43, FBXW7, FEZ1, FLCN,…
GO:0009057	macromolecule catabolic process	GO_BiologicalProcess-GOA_09.02.2016_16h18	2.9e-12	1.7e-09	1e-08	3.4e-07	[4]	Group10	26.7432	326	[ACD, ADAMTS12, ADAMTS7, ADAMTS9, AGO3, AGRN, AMFR, ANAPC1, ANAPC15, ANAPC5, ARIH1, ARIH2, ARSB, ATG4B, ATRAID, AUP1, AURKA, AURKB, BBS7, BNIP3, BTG2, BUB1, BUB1B, BUB3, C18orf25, C19orf68, CAPN2, CBLB, CCAR2, CCNB1, CDC16, CDC20, CDC23, CDK1, CDK2, CDKN1B, CECR2, CENPF, CHID1, CHORDC1, CHP1, CLN5, CLN6, CLPX, CNOT1, CNOT3, CPAMD8, CRBN, CREBRF, CSDE1, CSNK1A1, CSNK1E, CSNK2A1, CSPG4, CST3, CTSB,…
GO:0009896	positive regulation of catabolic process	GO_BiologicalProcess-GOA_09.02.2016_16h18	1e-06	0.00051	1e-08	3.4e-07	[3, 4, 5]	Group10	28.8221	115	[ABHD5, AKT2, ANAPC1, ANAPC15, ANAPC5, ARIH1, ARIH2, ATG4B, AURKA, BBS7, BNIP3, BTG2, CBLB, CCNB1, CDC16, CDC20, CDC23, CDK1, CDKN1B, CNOT1, CPAMD8, CPT1A, CREBRF, CSNK1A1, CSNK1E, CSNK2A1, CTSC, CUL3, DACT1, DDRGK1, DLGAP5, DNAJB2, EDEM1, ESPL1, EZR, FBXW7, FLCN, FOXO1, GAPDHS, GBA, GJA1, GPC3, GSK3B, HERPUD1, HNRNPR, IRS1, IRS2, LARP1, MAPK15, MDM2, MIA3, MSN, NEDD4, NEDD4L, NFE2L2, NSF, OAZ1, …
GO:0030163	protein catabolic process	GO_BiologicalProcess-GOA_09.02.2016_16h18	2e-08	1.1e-05	1e-08	3.4e-07	[4, 5]	Group10	26.6187	222	[ACD, ADAMTS12, ADAMTS7, ADAMTS9, AMFR, ANAPC1, ANAPC15, ANAPC5, ARIH1, ARIH2, ATG4B, ATRAID, AUP1, AURKA, AURKB, BBS7, BNIP3, BUB1, BUB1B, BUB3, C18orf25, C19orf68, CAPN2, CBLB, CCAR2, CCNB1, CDC16, CDC20, CDC23, CDK1, CDK2, CDKN1B, CENPF, CLN5, CLN6, CLPX, CPAMD8, CRBN, CREBRF, CSNK1A1, CSNK1E, CSNK2A1, CST3, CTSB, CTSC, CTSF, CTSV, CUL3, DACT1, DDIT3, DDRGK1, DERL2, DLGAP5, DNAJB2, DNAJB9, DNA…
GO:0031329	regulation of cellular catabolic process	GO_BiologicalProcess-GOA_09.02.2016_16h18	2.1e-07	0.00011	1e-08	3.4e-07	[4, 5]	Group10	27.4247	164	[ABHD5, ABL2, AKT2, ANAPC1, ANAPC15, ANAPC5, ARIH1, ARIH2, ATRAID, AURKA, BBS7, BCL2, BNIP3, BTG2, BUB1, BUB1B, BUB3, CCAR2, CCNB1, CDC16, CDC20, CDC23, CDK1, CENPF, CNOT1, CPT1A, CSNK1A1, CSNK1E, CSNK2A1, CST3, CTSC, CTTN, CUL3, DACT1, DAPK3, DDIT4, DDRGK1, DLGAP5, DNAJB2, DRAM2, DUSP1, EEF1A2, ERN1, ESPL1, EZR, FBXW7, FEZ1, FLCN, FOXO1, FZD5, GABARAPL2, GAPDHS, GBA, GEN1, GOLGA2, GSK3B, HERC1, …
GO:0044265	cellular macromolecule catabolic process	GO_BiologicalProcess-GOA_09.02.2016_16h18	8.3e-12	4.9e-09	1e-08	3.4e-07	[4, 5]	Group10	27.6004	268	[ADAMTS12, ADAMTS7, ADAMTS9, AGO3, AMFR, ANAPC1, ANAPC15, ANAPC5, ARIH1, ARIH2, ATRAID, AUP1, AURKA, AURKB, BBS7, BNIP3, BTG2, BUB1, BUB1B, BUB3, C18orf25, C19orf68, CAPN2, CCAR2, CCNB1, CDC16, CDC20, CDC23, CDK1, CDK2, CECR2, CENPF, CLN6, CLPX, CNOT1, CNOT3, CRBN, CSDE1, CSNK1A1, CSNK1E, CSNK2A1, CST3, CTSB, CTSC, CTSF, CTSV, CUL3, DACT1, DCP1A, DDIT3, DDRGK1, DERL2, DLGAP5, DNA2, DNAJB2, DNAJB9…
GO:0031331	positive regulation of cellular catabolic process	GO_BiologicalProcess-GOA_09.02.2016_16h18	2.6e-05	0.011	1e-08	3.4e-07	[4, 5, 6]	Group10	28.3133	94	[ABHD5, AKT2, ANAPC1, ANAPC15, ANAPC5, ARIH1, ARIH2, AURKA, BBS7, BNIP3, BTG2, CCNB1, CDC16, CDC20, CDC23, CDK1, CNOT1, CPT1A, CSNK1A1, CSNK1E, CTSC, CUL3, DACT1, DDRGK1, DLGAP5, DNAJB2, ESPL1, EZR, FBXW7, FLCN, FOXO1, GAPDHS, GBA, GSK3B, HERPUD1, HNRNPR, IRS1, IRS2, LARP1, MDM2, MIA3, MSN, NFE2L2, OSBPL7, PIAS1, PLIN5, PLK1, PLK2, PNPLA2, PNPT1, PSMA3, PSMA6, PSMB2, PSMB7, PSMD11, PSMD12, PSMD13…
GO:0042176	regulation of protein catabolic process	GO_BiologicalProcess-GOA_09.02.2016_16h18	9.2e-06	0.0043	1e-08	3.4e-07	[4, 5, 6]	Group10	27.8049	114	[ANAPC1, ANAPC15, ANAPC5, ARIH1, ARIH2, ATG4B, ATRAID, AURKA, BBS7, BUB1, BUB1B, BUB3, CBLB, CCAR2, CCNB1, CDC16, CDC20, CDC23, CDK1, CDKN1B, CENPF, CPAMD8, CREBRF, CSNK1A1, CSNK1E, CSNK2A1, CST3, CTSC, CUL3, DACT1, DDRGK1, DERL2, DLGAP5, DNAJB2, DUSP1, EDEM1, ESPL1, EZR, FBXO43, FBXW7, FLNA, FOXO1, GABARAPL2, GBA, GEN1, GJA1, GPC3, GRIN2A, GSK3B, HERPUD1, MAD2L1, MAPK15, MDM2, MSN, MYCBP2, NEDD4…
GO:0045732	positive regulation of protein catabolic process	GO_BiologicalProcess-GOA_09.02.2016_16h18	1.9e-06	0.00095	1e-08	3.4e-07	[4, 5, 6, 7]	Group10	30.855	83	[ANAPC1, ANAPC15, ANAPC5, ARIH1, ARIH2, ATG4B, AURKA, BBS7, CBLB, CCNB1, CDC16, CDC20, CDC23, CDK1, CDKN1B, CPAMD8, CREBRF, CSNK1A1, CSNK1E, CSNK2A1, CTSC, CUL3, DACT1, DDRGK1, DLGAP5, DNAJB2, EDEM1, ESPL1, EZR, FBXW7, FOXO1, GBA, GJA1, GPC3, GSK3B, HERPUD1, MAPK15, MDM2, MSN, NEDD4, NEDD4L, NFE2L2, NSF, OAZ1, OAZ2, OSBPL7, PIAS1, PLK1, PLK2, PSMA3, PSMA6, PSMB2, PSMB7, PSMD11, PSMD12, PSMD13, PS…
GO:0008152	metabolic process	GO_BiologicalProcess-GOA_09.02.2016_16h18	5.6e-27	3.8e-24	4e-07	1.1e-05	[1]	Group11	20.8752	2533	[AAAS, AAK1, AARS, AASS, ABCA1, ABCC4, ABCC5, ABCD3, ABCD4, ABHD12, ABHD16B, ABHD3, ABHD4, ABHD5, ABI1, ABL2, ACACA, ACAD11, ACAD8, ACBD3, ACD, ACER3, ACOT13, ACP1, ACSL3, ACTA2, ACTB, ACTC1, ACVR1, ACVR1B, ACVR2B, ACYP1, ADAM10, ADAM11, ADAM12, ADAM19, ADAMTS12, ADAMTS15, ADAMTS18, ADAMTS3, ADAMTS7, ADAMTS9, ADCY3, ADCY6, ADCY9, ADD1, ADH5, ADIPOR1, ADM2, ADNP, ADPGK, ADRBK1, AEBP2, AEN, AFF3, A…
GO:0065007	biological regulation	GO_BiologicalProcess-GOA_09.02.2016_16h18	2.2e-07	0.00011	4e-07	1.1e-05	[1]	Group11	19.9312	2317	[AAAS, AAK1, AARS, ABCA1, ABCC4, ABHD12, ABHD4, ABHD5, ABI1, ABL2, ACACA, ACAD11, ACAD8, ACD, ACER3, ACSL3, ACTA2, ACTB, ACTC1, ACTG1, ACVR1, ACVR1B, ACVR2B, ADAM10, ADAM11, ADAM12, ADAMTS12, ADAMTS18, ADAMTS3, ADAMTS7, ADCY3, ADCY6, ADCY9, ADD1, ADGRA3, ADGRV1, ADH5, ADIPOR1, ADM2, ADNP, ADRBK1, AEBP2, AEN, AFF3, AFF4, AGAP6, AGFG1, AGO3, AGRN, AHI1, AHSA2, AKAP1, AKAP10, AKAP12, AKAP17A, AKAP6,…
GO:0050789	regulation of biological process	GO_BiologicalProcess-GOA_09.02.2016_16h18	7.7e-08	4e-05	4e-07	1.1e-05	[1, 2]	Group11	20.0467	2230	[AAAS, AAK1, AARS, ABCA1, ABHD5, ABI1, ABL2, ACACA, ACAD8, ACD, ACER3, ACSL3, ACTA2, ACTB, ACTC1, ACTG1, ACVR1, ACVR1B, ACVR2B, ADAM10, ADAM11, ADAM12, ADAMTS12, ADAMTS18, ADAMTS3, ADAMTS7, ADCY3, ADCY6, ADCY9, ADD1, ADGRA3, ADGRV1, ADIPOR1, ADM2, ADNP, ADRBK1, AEBP2, AEN, AFF3, AFF4, AGAP6, AGFG1, AGO3, AGRN, AHI1, AHSA2, AKAP1, AKAP10, AKAP12, AKAP17A, AKAP6, AKIRIN2, AKR1B1, AKT2, AKT3, AKTIP,…
GO:0006807	nitrogen compound metabolic process	GO_BiologicalProcess-GOA_09.02.2016_16h18	4.4e-30	3e-27	4e-07	1.1e-05	[2]	Group11	22.9711	1619	[AAAS, AARS, AASS, ABCA1, ABCC5, ABCD4, ABHD12, ABHD3, ACACA, ACAD8, ACD, ACER3, ACSL3, ACVR1, ACVR1B, ACVR2B, ADCY3, ADCY6, ADCY9, ADNP, ADPGK, AEBP2, AEN, AFF3, AFF4, AGO3, AGRN, AHCY, AHCYL2, AHI1, AK2, AK7, AK9, AKAP12, AKAP17A, AKAP6, AKIRIN2, AKR1B1, AKT2, ALDH18A1, ALDH1L2, ALDH5A1, ALDH7A1, ALKBH1, ALKBH5, ALPK3, AMD1, ANKRA2, ANP32A, ANTXR1, APBB1, APEX1, APP, AQR, ARGLU1, ARHGEF11, ARID…
GO:0009058	biosynthetic process	GO_BiologicalProcess-GOA_09.02.2016_16h18	3.4e-26	2.3e-23	4e-07	1.1e-05	[2]	Group11	22.9368	1498	[AAAS, AARS, ABCA1, ABCC5, ABCD3, ABHD3, ABHD4, ABHD5, ACACA, ACAD8, ACBD3, ACD, ACER3, ACOT13, ACSL3, ACVR1, ACVR1B, ACVR2B, ADAMTS3, ADAMTS7, ADCY3, ADCY6, ADCY9, ADNP, AEBP2, AFF3, AFF4, AGO3, AGPAT4, AGRN, AHCY, AHI1, AK2, AK7, AK9, AKAP12, AKAP17A, AKAP6, AKIRIN2, AKR1B1, AKT2, ALDH18A1, ALDH1L2, ALDH7A1, ALG2, ALG6, ALPK3, AMD1, ANK3, ANKRA2, ANP32A, ANTXR1, AP3D1, APBB1, APEX1, APP, ARCN1,…
GO:0044237	cellular metabolic process	GO_BiologicalProcess-GOA_09.02.2016_16h18	1.5e-34	1e-31	4e-07	1.1e-05	[2]	Group11	21.7371	2280	[AAAS, AAK1, AARS, AASS, ABCA1, ABCD3, ABCD4, ABHD12, ABHD3, ABHD4, ABHD5, ABI1, ABL2, ACACA, ACAD11, ACAD8, ACD, ACER3, ACOT13, ACP1, ACSL3, ACTB, ACVR1, ACVR1B, ACVR2B, ACYP1, ADAM10, ADAMTS12, ADAMTS7, ADAMTS9, ADCY3, ADCY6, ADCY9, ADD1, ADH5, ADIPOR1, ADM2, ADNP, ADPGK, ADRBK1, AEBP2, AEN, AFF3, AFF4, AGO3, AGPAT4, AGRN, AHCY, AHCYL2, AHI1, AK2, AK7, AK9, AKAP1, AKAP10, AKAP12, AKAP17A, AKAP6…
GO:0044238	primary metabolic process	GO_BiologicalProcess-GOA_09.02.2016_16h18	1.5e-28	1e-25	4e-07	1.1e-05	[2]	Group11	21.4448	2265	[AAAS, AAK1, AARS, AASS, ABCA1, ABCC5, ABCD3, ABHD12, ABHD3, ABHD4, ABHD5, ABI1, ABL2, ACACA, ACAD11, ACAD8, ACBD3, ACD, ACER3, ACOT13, ACP1, ACSL3, ACTB, ACVR1, ACVR1B, ACVR2B, ADAM10, ADAM11, ADAM12, ADAM19, ADAMTS12, ADAMTS15, ADAMTS18, ADAMTS3, ADAMTS7, ADAMTS9, ADCY3, ADCY6, ADCY9, ADD1, ADH5, ADIPOR1, ADM2, ADNP, ADPGK, ADRBK1, AEBP2, AEN, AFF3, AFF4, AGO3, AGPAT4, AGRN, AHCY, AHCYL2, AHI1,…
GO:0048518	positive regulation of biological process	GO_BiologicalProcess-GOA_09.02.2016_16h18	1.9e-14	1.2e-11	4e-07	1.1e-05	[1, 2, 3]	Group11	22.1257	1274	[AAK1, ABCA1, ABHD5, ABI1, ABL2, ACACA, ACD, ACER3, ACSL3, ACTA2, ACTB, ACTC1, ACTG1, ACVR1, ACVR1B, ACVR2B, ADAM10, ADAMTS3, ADCY3, ADCY6, ADCY9, ADIPOR1, ADM2, ADNP, ADRBK1, AGAP6, AGFG1, AGRN, AHI1, AHSA2, AKAP12, AKAP6, AKIRIN2, AKR1B1, AKT2, AKTIP, ALDH1A1, ANAPC1, ANAPC15, ANAPC5, ANK3, ANTXR1, AP1G1, AP3B1, AP3D1, APBB1, APEX1, APP, ARF1, ARFGAP1, ARFGAP3, ARFGEF1, ARFGEF2, ARFGEF3, ARFIP2…
GO:0071704	organic substance metabolic process	GO_BiologicalProcess-GOA_09.02.2016_16h18	3.6e-27	2.4e-24	4e-07	1.1e-05	[2]	Group11	21.2705	2317	[AAAS, AAK1, AARS, AASS, ABCA1, ABCC5, ABCD3, ABCD4, ABHD12, ABHD3, ABHD4, ABHD5, ABI1, ABL2, ACACA, ACAD11, ACAD8, ACBD3, ACD, ACER3, ACOT13, ACP1, ACSL3, ACTA2, ACTB, ACTC1, ACVR1, ACVR1B, ACVR2B, ADAM10, ADAM11, ADAM12, ADAM19, ADAMTS12, ADAMTS15, ADAMTS18, ADAMTS3, ADAMTS7, ADAMTS9, ADCY3, ADCY6, ADCY9, ADD1, ADH5, ADIPOR1, ADM2, ADNP, ADPGK, ADRBK1, AEBP2, AEN, AFF3, AFF4, AGFG1, AGO3, AGPAT…
GO:0019222	regulation of metabolic process	GO_BiologicalProcess-GOA_09.02.2016_16h18	3.8e-25	2.5e-22	4e-07	1.1e-05	[2, 3]	Group11	22.6519	1570	[AAAS, AARS, ABCA1, ABHD5, ABI1, ABL2, ACACA, ACAD8, ACD, ACSL3, ACTA2, ACTB, ACTC1, ACVR1, ACVR1B, ACVR2B, ADCY3, ADCY6, ADCY9, ADIPOR1, ADM2, ADNP, ADRBK1, AEBP2, AFF3, AFF4, AGAP6, AGFG1, AGO3, AGRN, AHI1, AHSA2, AKAP1, AKAP12, AKAP17A, AKAP6, AKIRIN2, AKR1B1, AKT2, AKTIP, ALDH1A1, ALPK3, ANAPC1, ANAPC15, ANAPC5, ANK3, ANKRA2, ANOS1, ANP32A, ANP32E, ANTXR1, APBA2, APBB1, APEX1, APLP2, APP, ARF…
GO:0050794	regulation of cellular process	GO_BiologicalProcess-GOA_09.02.2016_16h18	5.4e-10	3.1e-07	4e-07	1.1e-05	[2, 3]	Group11	20.3247	2153	[AAAS, AAK1, AARS, ABCA1, ABHD5, ABI1, ABL2, ACACA, ACAD8, ACD, ACER3, ACSL3, ACTB, ACTC1, ACTG1, ACVR1, ACVR1B, ACVR2B, ADAM10, ADAM11, ADAM12, ADAMTS12, ADAMTS18, ADAMTS3, ADAMTS7, ADCY3, ADCY6, ADCY9, ADD1, ADGRA3, ADGRV1, ADIPOR1, ADM2, ADNP, ADRBK1, AEBP2, AEN, AFF3, AFF4, AGO3, AGRN, AHI1, AKAP1, AKAP10, AKAP12, AKAP17A, AKAP6, AKIRIN2, AKR1B1, AKT2, AKT3, AKTIP, ALPK3, AMFR, ANAPC1, ANAPC1…
GO:0006725	cellular aromatic compound metabolic process	GO_BiologicalProcess-GOA_09.02.2016_16h18	8.4e-25	5.5e-22	4e-07	1.1e-05	[3]	Group11	23.0807	1395	[AAAS, AARS, ABCA1, ABCD4, ACACA, ACAD8, ACD, ACVR1, ACVR1B, ACVR2B, ADCY3, ADCY6, ADCY9, ADNP, ADPGK, AEBP2, AEN, AFF3, AFF4, AGO3, AGRN, AHCY, AHCYL2, AHI1, AK2, AK7, AK9, AKAP12, AKAP17A, AKAP6, AKIRIN2, AKR1B1, AKT2, ALDH1L2, ALKBH1, ALKBH5, ALPK3, AMD1, ANKRA2, ANP32A, ANTXR1, APBB1, APEX1, APP, AQR, ARGLU1, ARHGEF11, ARID1A, ARID3B, ARID4A, ARID5B, ARMCX3, ARNT2, ASCC3, ASCL1, ASF1B, ASXL1,…
GO:0009893	positive regulation of metabolic process	GO_BiologicalProcess-GOA_09.02.2016_16h18	4.9e-17	3.1e-14	4e-07	1.1e-05	[2, 3, 4]	Group11	23.7023	895	[ABCA1, ABHD5, ABI1, ABL2, ACACA, ACD, ACSL3, ACTA2, ACTB, ACTC1, ACVR1, ACVR1B, ACVR2B, ADCY3, ADCY6, ADCY9, ADM2, ADNP, ADRBK1, AGAP6, AGFG1, AGRN, AHI1, AHSA2, AKAP12, AKAP6, AKIRIN2, AKR1B1, AKT2, AKTIP, ALDH1A1, ANAPC1, ANAPC15, ANAPC5, ANK3, ANTXR1, APBB1, APEX1, APP, ARF1, ARFGAP1, ARFGAP3, ARFGEF1, ARFGEF2, ARFGEF3, ARHGAP11A, ARHGAP17, ARHGAP21, ARHGAP23, ARHGAP33, ARHGAP5, ARHGEF1, ARHG…
GO:0034641	cellular nitrogen compound metabolic process	GO_BiologicalProcess-GOA_09.02.2016_16h18	2.7e-29	1.8e-26	4e-07	1.1e-05	[3]	Group11	23.0781	1555	[AAAS, AARS, AASS, ABCA1, ABHD3, ACACA, ACAD8, ACD, ACER3, ACSL3, ACVR1, ACVR1B, ACVR2B, ADCY3, ADCY6, ADCY9, ADNP, ADPGK, AEBP2, AEN, AFF3, AFF4, AGO3, AGRN, AHCY, AHCYL2, AHI1, AK2, AK7, AK9, AKAP12, AKAP17A, AKAP6, AKIRIN2, AKR1B1, AKT2, ALDH18A1, ALDH1L2, ALDH5A1, ALDH7A1, ALKBH1, ALKBH5, ALPK3, AMD1, ANKRA2, ANP32A, ANTXR1, APBB1, APEX1, APP, AQR, ARGLU1, ARHGEF11, ARID1A, ARID3B, ARID4A, AR…
GO:0043170	macromolecule metabolic process	GO_BiologicalProcess-GOA_09.02.2016_16h18	3.5e-34	2.4e-31	4e-07	1.1e-05	[3]	Group11	22.1559	2078	[AAAS, AAK1, AARS, ABCA1, ABCC5, ABHD5, ABI1, ABL2, ACACA, ACAD8, ACD, ACP1, ACTA2, ACTB, ACTC1, ACVR1, ACVR1B, ACVR2B, ADAM10, ADAM11, ADAM12, ADAM19, ADAMTS12, ADAMTS15, ADAMTS18, ADAMTS3, ADAMTS7, ADAMTS9, ADCY3, ADCY6, ADCY9, ADD1, ADH5, ADM2, ADNP, ADRBK1, AEBP2, AEN, AFF3, AFF4, AGFG1, AGO3, AGRN, AHI1, AKAP1, AKAP17A, AKAP6, AKIRIN2, AKR1B1, AKT2, AKT3, AKTIP, ALG2, ALG6, ALKBH1, ALKBH5, A…
GO:0044249	cellular biosynthetic process	GO_BiologicalProcess-GOA_09.02.2016_16h18	1.1e-26	7.7e-24	4e-07	1.1e-05	[3]	Group11	23.0806	1464	[AAAS, AARS, ABCA1, ABCD3, ABHD3, ABHD4, ABHD5, ACACA, ACAD8, ACD, ACER3, ACOT13, ACSL3, ACVR1, ACVR1B, ACVR2B, ADAMTS7, ADCY3, ADCY6, ADCY9, ADNP, AEBP2, AFF3, AFF4, AGO3, AGPAT4, AGRN, AHCY, AHI1, AK2, AK7, AK9, AKAP12, AKAP17A, AKAP6, AKIRIN2, AKR1B1, AKT2, ALDH18A1, ALDH7A1, ALG2, ALG6, ALPK3, AMD1, ANK3, ANKRA2, ANP32A, ANTXR1, APBB1, APEX1, APP, ARCN1, ARF1, ARFGAP1, ARFGAP3, ARFGEF1, ARGLU…
GO:0046483	heterocycle metabolic process	GO_BiologicalProcess-GOA_09.02.2016_16h18	1.2e-26	8.2e-24	4e-07	1.1e-05	[3]	Group11	23.2581	1402	[AAAS, AARS, ABCA1, ABCD4, ACACA, ACAD8, ACD, ACVR1, ACVR1B, ACVR2B, ADCY3, ADCY6, ADCY9, ADNP, ADPGK, AEBP2, AEN, AFF3, AFF4, AGO3, AGRN, AHCY, AHCYL2, AHI1, AK2, AK7, AK9, AKAP12, AKAP17A, AKAP6, AKIRIN2, AKR1B1, AKT2, ALDH18A1, ALDH1L2, ALKBH1, ALKBH5, ALPK3, AMD1, ANKRA2, ANP32A, ANTXR1, APBB1, APEX1, APP, AQR, ARGLU1, ARHGEF11, ARID1A, ARID3B, ARID4A, ARID5B, ARMCX3, ARNT2, ASCC3, ASCL1, ASF…
GO:1901360	organic cyclic compound metabolic process	GO_BiologicalProcess-GOA_09.02.2016_16h18	1.2e-23	8.4e-21	4e-07	1.1e-05	[3]	Group11	22.8526	1434	[AAAS, AARS, ABCA1, ABCD4, ACACA, ACAD8, ACBD3, ACD, ACVR1, ACVR1B, ACVR2B, ADCY3, ADCY6, ADCY9, ADNP, ADPGK, AEBP2, AEN, AFF3, AFF4, AGO3, AGRN, AHCY, AHCYL2, AHI1, AK2, AK7, AK9, AKAP12, AKAP17A, AKAP6, AKIRIN2, AKR1B1, AKT2, ALDH18A1, ALDH1L2, ALKBH1, ALKBH5, ALPK3, AMD1, ANKRA2, ANP32A, ANTXR1, APBB1, APEX1, APLP2, APP, AQR, ARGLU1, ARHGEF11, ARID1A, ARID3B, ARID4A, ARID5B, ARMCX3, ARNT2, ARV…
GO:1901576	organic substance biosynthetic process	GO_BiologicalProcess-GOA_09.02.2016_16h18	3.5e-27	2.3e-24	4e-07	1.1e-05	[3]	Group11	23.071	1486	[AAAS, AARS, ABCA1, ABCC5, ABCD3, ABHD3, ABHD4, ABHD5, ACACA, ACAD8, ACBD3, ACD, ACER3, ACOT13, ACSL3, ACVR1, ACVR1B, ACVR2B, ADAMTS3, ADAMTS7, ADCY3, ADCY6, ADCY9, ADNP, AEBP2, AFF3, AFF4, AGO3, AGPAT4, AGRN, AHCY, AHI1, AK2, AK7, AK9, AKAP12, AKAP17A, AKAP6, AKIRIN2, AKR1B1, AKT2, ALDH18A1, ALDH7A1, ALG2, ALG6, ALPK3, AMD1, ANK3, ANKRA2, ANP32A, ANTXR1, APBB1, APEX1, APP, ARCN1, ARF1, ARFGAP1, …
GO:0006139	nucleobase-containing compound metabolic process	GO_BiologicalProcess-GOA_09.02.2016_16h18	6.5e-28	4.4e-25	4e-07	1.1e-05	[3, 4]	Group11	23.4881	1371	[AAAS, AARS, ABCA1, ACACA, ACAD8, ACD, ACVR1, ACVR1B, ACVR2B, ADCY3, ADCY6, ADCY9, ADNP, ADPGK, AEBP2, AEN, AFF3, AFF4, AGO3, AGRN, AHCY, AHCYL2, AHI1, AK2, AK7, AK9, AKAP12, AKAP17A, AKAP6, AKIRIN2, AKR1B1, AKT2, ALKBH1, ALKBH5, ALPK3, AMD1, ANKRA2, ANP32A, ANTXR1, APBB1, APEX1, APP, AQR, ARGLU1, ARHGEF11, ARID1A, ARID3B, ARID4A, ARID5B, ARMCX3, ARNT2, ASCC3, ASCL1, ASF1B, ASXL1, ATAD2, ATF2, AT…
GO:0009889	regulation of biosynthetic process	GO_BiologicalProcess-GOA_09.02.2016_16h18	1.7e-16	1.1e-13	4e-07	1.1e-05	[3, 4]	Group11	23.1524	1015	[AARS, ABCA1, ACAD8, ACD, ACSL3, ACVR1, ACVR1B, ACVR2B, ADNP, AEBP2, AFF3, AFF4, AGO3, AGRN, AHI1, AKAP12, AKAP17A, AKAP6, AKIRIN2, AKR1B1, AKT2, ALPK3, ANKRA2, ANP32A, ANTXR1, APBB1, APEX1, APP, ARFGEF1, ARGLU1, ARHGEF11, ARID1A, ARID3B, ARID4A, ARID5B, ARMCX3, ARNT2, ARPP19, ASB1, ASCC3, ASCL1, ASF1B, ASXL1, ATAD2, ATF2, ATF3, ATF5, ATF6B, ATF7IP2, ATR, ATXN1L, ATXN2, AURKB, BACH2, BAHCC1, BAMB…
GO:0019538	protein metabolic process	GO_BiologicalProcess-GOA_09.02.2016_16h18	1.3e-20	8.7e-18	4e-07	1.1e-05	[3, 4]	Group11	22.755	1343	[AAAS, AAK1, AARS, ABCA1, ABHD5, ABI1, ABL2, ACACA, ACD, ACP1, ACTB, ACVR1, ACVR1B, ACVR2B, ADAM10, ADAM11, ADAM12, ADAM19, ADAMTS12, ADAMTS15, ADAMTS18, ADAMTS3, ADAMTS7, ADAMTS9, ADCY3, ADCY6, ADCY9, ADD1, ADH5, ADM2, ADNP, ADRBK1, AGO3, AGRN, AKAP1, AKAP6, AKIRIN2, AKR1B1, AKT2, AKT3, AKTIP, ALG2, ALG6, ALPK3, AMFR, ANAPC1, ANAPC15, ANAPC5, ANK3, ANOS1, ANTXR1, APBB1, APEX1, APLP2, APP, ARCN1,…
GO:0031323	regulation of cellular metabolic process	GO_BiologicalProcess-GOA_09.02.2016_16h18	3.8e-22	2.5e-19	4e-07	1.1e-05	[3, 4]	Group11	22.82	1387	[AARS, ABCA1, ABHD5, ABI1, ABL2, ACACA, ACAD8, ACD, ACSL3, ACVR1, ACVR1B, ACVR2B, ADCY3, ADCY6, ADCY9, ADIPOR1, ADNP, AEBP2, AFF3, AFF4, AGO3, AGRN, AHI1, AKAP1, AKAP12, AKAP17A, AKAP6, AKIRIN2, AKR1B1, AKT2, AKTIP, ALPK3, ANAPC1, ANAPC15, ANAPC5, ANKRA2, ANOS1, ANP32A, ANTXR1, APBB1, APEX1, APLP2, APP, ARF1, ARFGEF1, ARFGEF3, ARGLU1, ARHGEF11, ARID1A, ARID3B, ARID4A, ARID5B, ARIH1, ARIH2, ARMCX3…
GO:0044260	cellular macromolecule metabolic process	GO_BiologicalProcess-GOA_09.02.2016_16h18	1.3e-43	9.5e-41	4e-07	1.1e-05	[3, 4]	Group11	22.9393	1987	[AAAS, AAK1, AARS, ABCA1, ABI1, ABL2, ACAD8, ACD, ACP1, ACTB, ACVR1, ACVR1B, ACVR2B, ADAM10, ADAMTS12, ADAMTS7, ADAMTS9, ADCY3, ADCY6, ADCY9, ADD1, ADH5, ADM2, ADNP, ADRBK1, AEBP2, AFF3, AFF4, AGO3, AGRN, AHI1, AKAP1, AKAP17A, AKAP6, AKIRIN2, AKR1B1, AKT2, AKT3, AKTIP, ALG2, ALG6, ALKBH1, ALKBH5, ALPK3, AMFR, ANAPC1, ANAPC15, ANAPC5, ANK3, ANKRA2, ANOS1, ANP32A, ANTXR1, APBB1, APEX1, APLP2, APP, …
GO:0051171	regulation of nitrogen compound metabolic process	GO_BiologicalProcess-GOA_09.02.2016_16h18	4.4e-21	2.9e-18	4e-07	1.1e-05	[3, 4]	Group11	23.7365	1052	[AARS, ABCA1, ACAD8, ACD, ACSL3, ACVR1, ACVR1B, ACVR2B, ADNP, AEBP2, AFF3, AFF4, AGO3, AGRN, AHI1, AKAP12, AKAP17A, AKAP6, AKIRIN2, AKR1B1, AKT2, ALPK3, ANKRA2, ANP32A, ANTXR1, APBB1, APEX1, APP, ARGLU1, ARHGEF11, ARID1A, ARID3B, ARID4A, ARID5B, ARMCX3, ARNT2, ASCC3, ASCL1, ASF1B, ASXL1, ATAD2, ATCAY, ATF2, ATF3, ATF5, ATF6B, ATF7IP2, ATR, ATXN1L, ATXN2, AURKB, BACH2, BAHCC1, BAMBI, BAZ2A, BBS7, …
GO:0060255	regulation of macromolecule metabolic process	GO_BiologicalProcess-GOA_09.02.2016_16h18	3e-24	2e-21	4e-07	1.1e-05	[3, 4]	Group11	23.0577	1383	[AAAS, AARS, ABI1, ABL2, ACAD8, ACD, ACTA2, ACTB, ACTC1, ACVR1, ACVR1B, ACVR2B, ADCY3, ADCY6, ADCY9, ADM2, ADNP, AEBP2, AFF3, AFF4, AGO3, AGRN, AHI1, AKAP1, AKAP17A, AKAP6, AKIRIN2, AKR1B1, AKT2, AKTIP, ALPK3, ANAPC1, ANAPC15, ANAPC5, ANK3, ANKRA2, ANOS1, ANP32A, ANTXR1, APBA2, APBB1, APEX1, APLP2, APP, ARF1, ARFGEF1, ARFGEF3, ARGLU1, ARHGEF11, ARID1A, ARID3B, ARID4A, ARID5B, ARIH1, ARIH2, ARMCX3…
GO:0080090	regulation of primary metabolic process	GO_BiologicalProcess-GOA_09.02.2016_16h18	6.4e-22	4.2e-19	4e-07	1.1e-05	[3, 4]	Group11	22.8395	1369	[AARS, ABCA1, ABHD5, ABI1, ABL2, ACAD8, ACD, ACSL3, ACVR1, ACVR1B, ACVR2B, ADCY3, ADCY6, ADCY9, ADIPOR1, ADNP, AEBP2, AFF3, AFF4, AGO3, AGRN, AHI1, AKAP1, AKAP12, AKAP17A, AKAP6, AKIRIN2, AKR1B1, AKT2, AKTIP, ALPK3, ANAPC1, ANAPC15, ANAPC5, ANKRA2, ANOS1, ANP32A, ANTXR1, APBB1, APEX1, APLP2, APP, ARF1, ARFGEF1, ARFGEF3, ARGLU1, ARHGEF11, ARID1A, ARID3B, ARID4A, ARID5B, ARIH1, ARIH2, ARMCX3, ARNT2…
GO:0009059	macromolecule biosynthetic process	GO_BiologicalProcess-GOA_09.02.2016_16h18	8.4e-31	5.8e-28	4e-07	1.1e-05	[4]	Group11	24.049	1296	[AAAS, AARS, ABCA1, ABCC5, ACAD8, ACD, ACVR1, ACVR1B, ACVR2B, ADAMTS3, ADAMTS7, ADNP, AEBP2, AFF3, AFF4, AGO3, AGRN, AHI1, AKAP17A, AKIRIN2, AKR1B1, AKT2, ALG2, ALG6, ALPK3, ANK3, ANKRA2, ANP32A, ANTXR1, APBB1, APEX1, APP, ARCN1, ARFGAP1, ARFGAP3, ARFGEF1, ARGLU1, ARHGEF11, ARID1A, ARID3B, ARID4A, ARID5B, ARMCX3, ARNT2, ASB1, ASCC3, ASCL1, ASF1B, ASXL1, ATAD2, ATF2, ATF3, ATF5, ATF6B, ATF7IP2, AT…
GO:0009891	positive regulation of biosynthetic process	GO_BiologicalProcess-GOA_09.02.2016_16h18	8e-07	0.00039	4e-07	1.1e-05	[3, 4, 5]	Group11	23.1086	449	[ABCA1, ACD, ACSL3, ACVR1, ACVR1B, ADNP, AGRN, AHI1, AKAP12, AKIRIN2, AKR1B1, AKT2, ANTXR1, APBB1, APP, ARFGEF1, ARHGEF11, ARID1A, ARID3B, ARID4A, ARID5B, ARMCX3, ARNT2, ARPP19, ASCL1, ASXL1, ATAD2, ATF2, ATF3, ATF5, ATF6B, ATR, AURKB, BAMBI, BCL9L, BCLAF1, BEX1, BLOC1S2, BMP2, BMP7, BRCA1, BRCA2, BRD1, BRD4, BRD7, BRIP1, BUD31, CALCOCO1, CALR, CAMK1D, CAMTA1, CCNL1, CCNL2, CCNT1, CCNT2, CCPG1, C…
GO:0010467	gene expression	GO_BiologicalProcess-GOA_09.02.2016_16h18	2e-27	1.4e-24	4e-07	1.1e-05	[4]	Group11	23.6665	1300	[AAAS, AARS, ACAD8, ACTA2, ACTB, ACTC1, ACVR1, ACVR1B, ACVR2B, ADAM10, ADAMTS3, ADM2, ADNP, AEBP2, AFF3, AFF4, AGFG1, AGO3, AGRN, AHI1, AKAP17A, AKIRIN2, AKR1B1, AKT2, ALKBH5, ALPK3, ANK3, ANKRA2, ANP32A, APBA2, APBB1, APEX1, APP, AQR, ARGLU1, ARHGEF11, ARID1A, ARID3B, ARID4A, ARID5B, ARMCX3, ARNT2, ASCC3, ASCL1, ASF1B, ASXL1, ATAD2, ATF2, ATF3, ATF5, ATF6B, ATF7IP2, ATG4B, ATG4D, ATRAID, ATXN1L,…
GO:0010604	positive regulation of macromolecule metabolic process	GO_BiologicalProcess-GOA_09.02.2016_16h18	1e-15	6.4e-13	4e-07	1.1e-05	[3, 4, 5]	Group11	24.1697	735	[ABI1, ABL2, ACD, ACTA2, ACTB, ACTC1, ACVR1, ACVR1B, ACVR2B, ADCY3, ADCY6, ADCY9, ADM2, ADNP, AGRN, AHI1, AKAP6, AKIRIN2, AKR1B1, AKT2, AKTIP, ANAPC1, ANAPC15, ANAPC5, ANK3, ANTXR1, APBB1, APEX1, APP, ARFGEF1, ARHGEF11, ARID1A, ARID3B, ARID4A, ARID5B, ARIH1, ARIH2, ARMCX3, ARNT2, ARRDC3, ASCL1, ASXL1, ATAD1, ATAD2, ATF2, ATF3, ATF5, ATF6B, ATG4B, ATP6AP1, ATR, ATRAID, AURKA, AURKB, BAMBI, BBC3, B…
GO:0018130	heterocycle biosynthetic process	GO_BiologicalProcess-GOA_09.02.2016_16h18	4.4e-17	2.8e-14	4e-07	1.1e-05	[4]	Group11	23.1713	1039	[AAAS, ABCA1, ACACA, ACAD8, ACD, ACVR1, ACVR1B, ACVR2B, ADCY3, ADCY6, ADCY9, ADNP, AEBP2, AFF3, AFF4, AGRN, AHI1, AK2, AK7, AK9, AKAP12, AKAP17A, AKAP6, AKIRIN2, AKR1B1, AKT2, ALDH18A1, ALPK3, AMD1, ANKRA2, ANP32A, APBB1, APEX1, APP, ARGLU1, ARHGEF11, ARID1A, ARID3B, ARID4A, ARID5B, ARMCX3, ARNT2, ASCC3, ASCL1, ASF1B, ASXL1, ATAD2, ATF2, ATF3, ATF5, ATF6B, ATF7IP2, ATG16L2, ATP5B, ATP5G1, ATP5G3,…
GO:0019438	aromatic compound biosynthetic process	GO_BiologicalProcess-GOA_09.02.2016_16h18	1.4e-16	8.9e-14	4e-07	1.1e-05	[4]	Group11	23.0958	1037	[AAAS, ABCA1, ACACA, ACAD8, ACD, ACVR1, ACVR1B, ACVR2B, ADCY3, ADCY6, ADCY9, ADNP, AEBP2, AFF3, AFF4, AGRN, AHI1, AK2, AK7, AK9, AKAP12, AKAP17A, AKAP6, AKIRIN2, AKR1B1, AKT2, ALPK3, AMD1, ANKRA2, ANP32A, APBB1, APEX1, APP, ARGLU1, ARHGEF11, ARID1A, ARID3B, ARID4A, ARID5B, ARMCX3, ARNT2, ASCC3, ASCL1, ASF1B, ASXL1, ATAD2, ATF2, ATF3, ATF5, ATF6B, ATF7IP2, ATG16L2, ATP5B, ATP5G1, ATP5G3, ATP5S, AT…
GO:0031325	positive regulation of cellular metabolic process	GO_BiologicalProcess-GOA_09.02.2016_16h18	2.7e-12	1.6e-09	4e-07	1.1e-05	[3, 4, 5]	Group11	23.4472	721	[ABCA1, ABHD5, ABI1, ABL2, ACACA, ACD, ACSL3, ACVR1, ACVR1B, ACVR2B, ADCY3, ADCY6, ADCY9, ADNP, AGRN, AHI1, AKAP12, AKAP6, AKIRIN2, AKR1B1, AKT2, AKTIP, ANAPC1, ANAPC15, ANAPC5, ANTXR1, APBB1, APEX1, APP, ARFGEF1, ARHGEF11, ARID1A, ARID3B, ARID4A, ARID5B, ARIH1, ARIH2, ARMCX3, ARNT2, ARPP19, ARRDC3, ASCL1, ASXL1, ATAD1, ATAD2, ATF2, ATF3, ATF5, ATF6B, ATP6AP1, ATR, ATRAID, AURKA, AURKB, BAMBI, BB…
GO:0044271	cellular nitrogen compound biosynthetic process	GO_BiologicalProcess-GOA_09.02.2016_16h18	4.2e-22	2.7e-19	4e-07	1.1e-05	[4]	Group11	23.4288	1178	[AAAS, AARS, ABCA1, ACACA, ACAD8, ACD, ACER3, ACVR1, ACVR1B, ACVR2B, ADCY3, ADCY6, ADCY9, ADNP, AEBP2, AFF3, AFF4, AGO3, AGRN, AHI1, AK2, AK7, AK9, AKAP12, AKAP17A, AKAP6, AKIRIN2, AKR1B1, AKT2, ALDH7A1, ALPK3, AMD1, ANKRA2, ANP32A, APBB1, APEX1, APP, ARGLU1, ARHGEF11, ARID1A, ARID3B, ARID4A, ARID5B, ARMCX3, ARNT2, ASCC3, ASCL1, ASF1B, ASNS, ASXL1, ATAD2, ATF2, ATF3, ATF5, ATF6B, ATF7IP2, ATG16L2…
GO:0051173	positive regulation of nitrogen compound metabolic process	GO_BiologicalProcess-GOA_09.02.2016_16h18	9.6e-10	5.5e-07	4e-07	1.1e-05	[3, 4, 5]	Group11	24.1919	464	[ABCA1, ACD, ACSL3, ACVR1, ACVR1B, ADNP, AGRN, AHI1, AKAP12, AKIRIN2, AKR1B1, AKT2, ANTXR1, APBB1, APEX1, APP, ARHGEF11, ARID1A, ARID3B, ARID4A, ARID5B, ARMCX3, ARNT2, ASCL1, ASXL1, ATAD2, ATF2, ATF3, ATF5, ATF6B, ATR, AURKB, BAMBI, BCL9L, BCLAF1, BEX1, BLOC1S2, BMP2, BMP7, BRCA1, BRCA2, BRD1, BRD4, BRD7, BRIP1, BTG2, BUD31, CALCOCO1, CALR, CAMK1D, CAMTA1, CCNB1, CCNL1, CCNL2, CCNT1, CCNT2, CCPG1…
GO:1901362	organic cyclic compound biosynthetic process	GO_BiologicalProcess-GOA_09.02.2016_16h18	3.8e-16	2.3e-13	4e-07	1.1e-05	[4]	Group11	22.9487	1060	[AAAS, ABCA1, ACACA, ACAD8, ACBD3, ACD, ACVR1, ACVR1B, ACVR2B, ADCY3, ADCY6, ADCY9, ADNP, AEBP2, AFF3, AFF4, AGRN, AHI1, AK2, AK7, AK9, AKAP12, AKAP17A, AKAP6, AKIRIN2, AKR1B1, AKT2, ALDH18A1, ALPK3, AMD1, ANKRA2, ANP32A, APBB1, APEX1, APP, ARGLU1, ARHGEF11, ARID1A, ARID3B, ARID4A, ARID5B, ARMCX3, ARNT2, ARV1, ASCC3, ASCL1, ASF1B, ASXL1, ATAD2, ATF2, ATF3, ATF5, ATF6B, ATF7IP2, ATG16L2, ATP5B, AT…
GO:0010468	regulation of gene expression	GO_BiologicalProcess-GOA_09.02.2016_16h18	5.4e-21	3.5e-18	4e-07	1.1e-05	[4, 5]	Group11	23.7489	1044	[AAAS, AARS, ACAD8, ACTA2, ACTB, ACTC1, ACVR1, ACVR1B, ACVR2B, ADM2, ADNP, AEBP2, AFF3, AFF4, AGO3, AGRN, AHI1, AKAP17A, AKIRIN2, AKR1B1, AKT2, ALPK3, ANK3, ANKRA2, ANP32A, APBA2, APBB1, APEX1, APP, ARGLU1, ARHGEF11, ARID1A, ARID3B, ARID4A, ARID5B, ARMCX3, ARNT2, ASCC3, ASCL1, ASF1B, ASXL1, ATAD2, ATF2, ATF3, ATF5, ATF6B, ATF7IP2, ATRAID, ATXN1L, ATXN2, AURKB, BACH2, BAHCC1, BAMBI, BAZ2A, BBS7, B…
GO:0010556	regulation of macromolecule biosynthetic process	GO_BiologicalProcess-GOA_09.02.2016_16h18	2.4e-19	1.5e-16	4e-07	1.1e-05	[4, 5]	Group11	23.7325	983	[AARS, ACAD8, ACD, ACVR1, ACVR1B, ACVR2B, ADNP, AEBP2, AFF3, AFF4, AGO3, AGRN, AHI1, AKAP17A, AKIRIN2, AKR1B1, AKT2, ALPK3, ANKRA2, ANP32A, ANTXR1, APBB1, APEX1, APP, ARFGEF1, ARGLU1, ARHGEF11, ARID1A, ARID3B, ARID4A, ARID5B, ARMCX3, ARNT2, ASB1, ASCC3, ASCL1, ASF1B, ASXL1, ATAD2, ATF2, ATF3, ATF5, ATF6B, ATF7IP2, ATR, ATXN1L, ATXN2, AURKB, BACH2, BAHCC1, BAMBI, BAZ2A, BBS7, BCL2, BCL6, BCL7A, BC…
GO:0019219	regulation of nucleobase-containing compound metabolic process	GO_BiologicalProcess-GOA_09.02.2016_16h18	1.8e-19	1.1e-16	4e-07	1.1e-05	[4, 5]	Group11	23.7588	981	[ABCA1, ACAD8, ACD, ACVR1, ACVR1B, ACVR2B, ADNP, AEBP2, AFF3, AFF4, AGRN, AHI1, AKAP12, AKAP17A, AKAP6, AKIRIN2, AKR1B1, AKT2, ALPK3, ANKRA2, ANP32A, ANTXR1, APBB1, APEX1, APP, ARGLU1, ARHGEF11, ARID1A, ARID3B, ARID4A, ARID5B, ARMCX3, ARNT2, ASCC3, ASCL1, ASF1B, ASXL1, ATAD2, ATF2, ATF3, ATF5, ATF6B, ATF7IP2, ATR, ATXN1L, AURKB, BACH2, BAHCC1, BAMBI, BAZ2A, BBS7, BCL6, BCL7A, BCL9L, BCLAF1, BEND3…
GO:0031326	regulation of cellular biosynthetic process	GO_BiologicalProcess-GOA_09.02.2016_16h18	6.4e-17	4e-14	4e-07	1.1e-05	[4, 5]	Group11	23.2488	1009	[AARS, ABCA1, ACAD8, ACD, ACSL3, ACVR1, ACVR1B, ACVR2B, ADNP, AEBP2, AFF3, AFF4, AGO3, AGRN, AHI1, AKAP12, AKAP17A, AKAP6, AKIRIN2, AKR1B1, AKT2, ALPK3, ANKRA2, ANP32A, ANTXR1, APBB1, APEX1, APP, ARFGEF1, ARGLU1, ARHGEF11, ARID1A, ARID3B, ARID4A, ARID5B, ARMCX3, ARNT2, ARPP19, ASB1, ASCC3, ASCL1, ASF1B, ASXL1, ATAD2, ATF2, ATF3, ATF5, ATF6B, ATF7IP2, ATR, ATXN1L, ATXN2, AURKB, BACH2, BAHCC1, BAMB…
GO:0034645	cellular macromolecule biosynthetic process	GO_BiologicalProcess-GOA_09.02.2016_16h18	1.9e-30	1.3e-27	4e-07	1.1e-05	[4, 5]	Group11	24.134	1261	[AARS, ABCA1, ACAD8, ACD, ACVR1, ACVR1B, ACVR2B, ADAMTS7, ADNP, AEBP2, AFF3, AFF4, AGO3, AGRN, AHI1, AKAP17A, AKIRIN2, AKR1B1, AKT2, ALG2, ALG6, ALPK3, ANK3, ANKRA2, ANP32A, ANTXR1, APBB1, APEX1, APP, ARCN1, ARFGAP1, ARFGAP3, ARFGEF1, ARGLU1, ARHGEF11, ARID1A, ARID3B, ARID4A, ARID5B, ARMCX3, ARNT2, ASCC3, ASCL1, ASF1B, ASXL1, ATAD2, ATF2, ATF3, ATF5, ATF6B, ATF7IP2, ATG4B, ATG4D, ATR, ATRIP, ATXN…
GO:0034654	nucleobase-containing compound biosynthetic process	GO_BiologicalProcess-GOA_09.02.2016_16h18	1.3e-17	8.7e-15	4e-07	1.1e-05	[4, 5]	Group11	23.2933	1027	[AAAS, ABCA1, ACACA, ACAD8, ACD, ACVR1, ACVR1B, ACVR2B, ADCY3, ADCY6, ADCY9, ADNP, AEBP2, AFF3, AFF4, AGRN, AHI1, AK2, AK7, AK9, AKAP12, AKAP17A, AKAP6, AKIRIN2, AKR1B1, AKT2, ALPK3, AMD1, ANKRA2, ANP32A, APBB1, APEX1, APP, ARGLU1, ARHGEF11, ARID1A, ARID3B, ARID4A, ARID5B, ARMCX3, ARNT2, ASCC3, ASCL1, ASF1B, ASXL1, ATAD2, ATF2, ATF3, ATF5, ATF6B, ATF7IP2, ATG16L2, ATP5B, ATP5G1, ATP5G3, ATP5S, AT…
GO:0044267	cellular protein metabolic process	GO_BiologicalProcess-GOA_09.02.2016_16h18	9.6e-28	6.5e-25	4e-07	1.1e-05	[4, 5]	Group11	23.8658	1252	[AAAS, AAK1, AARS, ABCA1, ABI1, ABL2, ACD, ACP1, ACTB, ACVR1, ACVR1B, ACVR2B, ADAM10, ADAMTS12, ADAMTS7, ADCY3, ADCY6, ADCY9, ADD1, ADH5, ADM2, ADNP, ADRBK1, AGO3, AKAP1, AKAP6, AKIRIN2, AKR1B1, AKT2, AKT3, AKTIP, ALG2, ALG6, ALPK3, AMFR, ANAPC1, ANAPC15, ANAPC5, ANK3, ANOS1, ANTXR1, APBB1, APEX1, APLP2, APP, ARCN1, ARFGAP1, ARFGAP3, ARFGEF1, ARFGEF3, ARHGEF6, ARID4A, ARIH1, ARIH2, ARPP19, ARRDC3…
GO:0051246	regulation of protein metabolic process	GO_BiologicalProcess-GOA_09.02.2016_16h18	1.3e-12	7.9e-10	4e-07	1.1e-05	[4, 5]	Group11	23.8459	656	[AARS, ABI1, ABL2, ACVR1, ACVR1B, ACVR2B, ADCY3, ADCY6, ADCY9, ADNP, AGO3, AKAP1, AKAP6, AKIRIN2, AKR1B1, AKT2, AKTIP, ANAPC1, ANAPC15, ANAPC5, ANOS1, APBB1, APEX1, APLP2, APP, ARFGEF1, ARFGEF3, ARIH1, ARIH2, ARPP19, ARRDC3, ASB1, ATF3, ATG4B, ATP6AP1, ATRAID, ATXN2, AURKA, BBC3, BBS7, BCCIP, BCL2, BCL2L13, BCL6, BHLHE40, BIRC5, BIRC6, BMP2, BMP7, BNIP2, BOK, BRAF, BRAT1, BRCA1, BRD4, BRD7, BTG2,…
GO:0090304	nucleic acid metabolic process	GO_BiologicalProcess-GOA_09.02.2016_16h18	1.1e-31	7.6e-29	4e-07	1.1e-05	[4, 5]	Group11	24.2657	1264	[AAAS, AARS, ACAD8, ACD, ACVR1, ACVR1B, ACVR2B, ADNP, AEBP2, AEN, AFF3, AFF4, AGO3, AGRN, AHI1, AKAP17A, AKIRIN2, AKR1B1, AKT2, ALKBH1, ALKBH5, ALPK3, ANKRA2, ANP32A, ANTXR1, APBB1, APEX1, APP, AQR, ARGLU1, ARHGEF11, ARID1A, ARID3B, ARID4A, ARID5B, ARMCX3, ARNT2, ASCC3, ASCL1, ASF1B, ASXL1, ATAD2, ATF2, ATF3, ATF5, ATF6B, ATF7IP2, ATG16L2, ATR, ATRIP, ATXN1L, ATXN2, AURKB, BACH2, BAHCC1, BAMBI, B…
GO:0010557	positive regulation of macromolecule biosynthetic process	GO_BiologicalProcess-GOA_09.02.2016_16h18	2.2e-09	1.3e-06	4e-07	1.1e-05	[4, 5, 6]	Group11	24.2954	431	[ACD, ACVR1, ACVR1B, AGRN, AHI1, AKIRIN2, AKR1B1, AKT2, ANTXR1, APBB1, APP, ARFGEF1, ARHGEF11, ARID1A, ARID3B, ARID4A, ARID5B, ARMCX3, ARNT2, ASCL1, ASXL1, ATAD2, ATF2, ATF3, ATF5, ATF6B, ATR, AURKB, BAMBI, BCL9L, BCLAF1, BEX1, BLOC1S2, BMP2, BMP7, BRCA1, BRCA2, BRD1, BRD4, BRD7, BRIP1, BUD31, CALCOCO1, CALR, CAMK1D, CAMTA1, CCNL1, CCNL2, CCNT1, CCNT2, CCPG1, CCT5, CCT8, CD276, CDC7, CDK1, CDK2, …
GO:0010628	positive regulation of gene expression	GO_BiologicalProcess-GOA_09.02.2016_16h18	2.9e-11	1.7e-08	4e-07	1.1e-05	[4, 5, 6]	Group11	24.7711	460	[ACTA2, ACTB, ACTC1, ACVR1, ACVR1B, ADM2, AGRN, AHI1, AKIRIN2, AKR1B1, AKT2, ANK3, APBB1, APP, ARHGEF11, ARID1A, ARID3B, ARID4A, ARID5B, ARMCX3, ARNT2, ASCL1, ASXL1, ATAD2, ATF2, ATF3, ATF5, ATF6B, BAMBI, BCL9L, BCLAF1, BEX1, BLOC1S2, BMP2, BMP7, BRAF, BRCA1, BRCA2, BRD1, BRD4, BRD7, BRIP1, BTG2, BUD31, CALCOCO1, CALR, CAMK1D, CAMTA1, CCNB1, CCNL1, CCNL2, CCNT1, CCNT2, CCPG1, CD46, CDK1, CDK2, CD…
GO:0016070	RNA metabolic process	GO_BiologicalProcess-GOA_09.02.2016_16h18	7.5e-26	5e-23	4e-07	1.1e-05	[4, 5, 6]	Group11	24.093	1129	[AAAS, AARS, ACAD8, ACVR1, ACVR1B, ACVR2B, ADNP, AEBP2, AFF3, AFF4, AGO3, AGRN, AHI1, AKAP17A, AKIRIN2, AKR1B1, AKT2, ALKBH1, ALKBH5, ALPK3, ANKRA2, ANP32A, APBB1, APEX1, APP, AQR, ARGLU1, ARHGEF11, ARID1A, ARID3B, ARID4A, ARID5B, ARMCX3, ARNT2, ASCC3, ASCL1, ASF1B, ASXL1, ATAD2, ATF2, ATF3, ATF5, ATF6B, ATF7IP2, ATG16L2, ATXN1L, ATXN2, AURKB, BACH2, BAHCC1, BAMBI, BAZ2A, BBS7, BCL6, BCL7A, BCL9L…
GO:0031328	positive regulation of cellular biosynthetic process	GO_BiologicalProcess-GOA_09.02.2016_16h18	2.5e-07	0.00013	4e-07	1.1e-05	[4, 5, 6]	Group11	23.3264	446	[ABCA1, ACD, ACSL3, ACVR1, ACVR1B, ADNP, AGRN, AHI1, AKAP12, AKIRIN2, AKR1B1, AKT2, ANTXR1, APBB1, APP, ARFGEF1, ARHGEF11, ARID1A, ARID3B, ARID4A, ARID5B, ARMCX3, ARNT2, ARPP19, ASCL1, ASXL1, ATAD2, ATF2, ATF3, ATF5, ATF6B, ATR, AURKB, BAMBI, BCL9L, BCLAF1, BEX1, BLOC1S2, BMP2, BMP7, BRCA1, BRCA2, BRD1, BRD4, BRD7, BRIP1, BUD31, CALCOCO1, CALR, CAMK1D, CAMTA1, CCNL1, CCNL2, CCNT1, CCNT2, CCPG1, C…
GO:0045935	positive regulation of nucleobase-containing compound metabolic process	GO_BiologicalProcess-GOA_09.02.2016_16h18	4.1e-09	2.3e-06	4e-07	1.1e-05	[4, 5, 6]	Group11	24.1341	439	[ABCA1, ACD, ACVR1, ACVR1B, ADNP, AGRN, AHI1, AKAP12, AKIRIN2, AKR1B1, AKT2, ANTXR1, APBB1, APEX1, APP, ARHGEF11, ARID1A, ARID3B, ARID4A, ARID5B, ARMCX3, ARNT2, ASCL1, ASXL1, ATAD2, ATF2, ATF3, ATF5, ATF6B, ATR, AURKB, BAMBI, BCL9L, BCLAF1, BEX1, BLOC1S2, BMP2, BMP7, BRCA1, BRCA2, BRD1, BRD4, BRD7, BRIP1, BTG2, BUD31, CALCOCO1, CALR, CAMK1D, CAMTA1, CCNB1, CCNL1, CCNL2, CCNT1, CCNT2, CCPG1, CCT5,…
GO:0051252	regulation of RNA metabolic process	GO_BiologicalProcess-GOA_09.02.2016_16h18	1.9e-18	1.2e-15	4e-07	1.1e-05	[4, 5, 6, 7]	Group11	23.9039	905	[ACAD8, ACVR1, ACVR1B, ACVR2B, ADNP, AEBP2, AFF3, AFF4, AGRN, AHI1, AKAP17A, AKIRIN2, AKR1B1, AKT2, ALPK3, ANKRA2, ANP32A, APBB1, APEX1, APP, ARGLU1, ARHGEF11, ARID1A, ARID3B, ARID4A, ARID5B, ARMCX3, ARNT2, ASCC3, ASCL1, ASF1B, ASXL1, ATAD2, ATF2, ATF3, ATF5, ATF6B, ATF7IP2, ATXN1L, AURKB, BACH2, BAHCC1, BAMBI, BAZ2A, BBS7, BCL6, BCL7A, BCL9L, BCLAF1, BEND3, BEX1, BHLHE40, BHLHE41, BIRC5, BLOC1S2…
GO:0051254	positive regulation of RNA metabolic process	GO_BiologicalProcess-GOA_09.02.2016_16h18	2.9e-09	1.6e-06	4e-07	1.1e-05	[4, 5, 6, 7, 8]	Group11	24.6077	392	[ACVR1, ACVR1B, AGRN, AHI1, AKIRIN2, AKR1B1, AKT2, APBB1, APP, ARHGEF11, ARID1A, ARID3B, ARID4A, ARID5B, ARMCX3, ARNT2, ASCL1, ASXL1, ATAD2, ATF2, ATF3, ATF5, ATF6B, BAMBI, BCL9L, BCLAF1, BEX1, BLOC1S2, BMP2, BMP7, BRCA1, BRCA2, BRD1, BRD4, BRD7, BRIP1, BTG2, BUD31, CALCOCO1, CAMK1D, CAMTA1, CCNB1, CCNL1, CCNL2, CCNT1, CCNT2, CCPG1, CDK2, CDK5RAP2, CDKN2AIP, CEBPB, CEBPG, CHD1, CHURC1, CITED2, CK…
GO:0043170	macromolecule metabolic process	GO_BiologicalProcess-GOA_09.02.2016_16h18	3.5e-34	2.4e-31	3.5e-34	1.9e-32	[3]	Group12	22.1559	2078	[AAAS, AAK1, AARS, ABCA1, ABCC5, ABHD5, ABI1, ABL2, ACACA, ACAD8, ACD, ACP1, ACTA2, ACTB, ACTC1, ACVR1, ACVR1B, ACVR2B, ADAM10, ADAM11, ADAM12, ADAM19, ADAMTS12, ADAMTS15, ADAMTS18, ADAMTS3, ADAMTS7, ADAMTS9, ADCY3, ADCY6, ADCY9, ADD1, ADH5, ADM2, ADNP, ADRBK1, AEBP2, AEN, AFF3, AFF4, AGFG1, AGO3, AGRN, AHI1, AKAP1, AKAP17A, AKAP6, AKIRIN2, AKR1B1, AKT2, AKT3, AKTIP, ALG2, ALG6, ALKBH1, ALKBH5, A…
GO:0019538	protein metabolic process	GO_BiologicalProcess-GOA_09.02.2016_16h18	1.3e-20	8.7e-18	3.5e-34	1.9e-32	[3, 4]	Group12	22.755	1343	[AAAS, AAK1, AARS, ABCA1, ABHD5, ABI1, ABL2, ACACA, ACD, ACP1, ACTB, ACVR1, ACVR1B, ACVR2B, ADAM10, ADAM11, ADAM12, ADAM19, ADAMTS12, ADAMTS15, ADAMTS18, ADAMTS3, ADAMTS7, ADAMTS9, ADCY3, ADCY6, ADCY9, ADD1, ADH5, ADM2, ADNP, ADRBK1, AGO3, AGRN, AKAP1, AKAP6, AKIRIN2, AKR1B1, AKT2, AKT3, AKTIP, ALG2, ALG6, ALPK3, AMFR, ANAPC1, ANAPC15, ANAPC5, ANK3, ANOS1, ANTXR1, APBB1, APEX1, APLP2, APP, ARCN1,…
GO:0044260	cellular macromolecule metabolic process	GO_BiologicalProcess-GOA_09.02.2016_16h18	1.3e-43	9.5e-41	3.5e-34	1.9e-32	[3, 4]	Group12	22.9393	1987	[AAAS, AAK1, AARS, ABCA1, ABI1, ABL2, ACAD8, ACD, ACP1, ACTB, ACVR1, ACVR1B, ACVR2B, ADAM10, ADAMTS12, ADAMTS7, ADAMTS9, ADCY3, ADCY6, ADCY9, ADD1, ADH5, ADM2, ADNP, ADRBK1, AEBP2, AFF3, AFF4, AGO3, AGRN, AHI1, AKAP1, AKAP17A, AKAP6, AKIRIN2, AKR1B1, AKT2, AKT3, AKTIP, ALG2, ALG6, ALKBH1, ALKBH5, ALPK3, AMFR, ANAPC1, ANAPC15, ANAPC5, ANK3, ANKRA2, ANOS1, ANP32A, ANTXR1, APBB1, APEX1, APLP2, APP, …
GO:0043412	macromolecule modification	GO_BiologicalProcess-GOA_09.02.2016_16h18	1.4e-22	9.7e-20	3.5e-34	1.9e-32	[4]	Group12	24.0841	1019	[AAAS, AAK1, AARS, ABCA1, ABI1, ABL2, ACP1, ACVR1, ACVR1B, ACVR2B, ADAM10, ADAMTS7, ADCY3, ADCY6, ADCY9, ADH5, ADM2, ADNP, ADRBK1, AKAP1, AKAP6, AKR1B1, AKT2, AKT3, AKTIP, ALG2, ALG6, ALKBH1, ALKBH5, ALPK3, AMFR, ANAPC1, ANAPC15, ANAPC5, ANK3, ANTXR1, APBB1, APEX1, APLP2, APP, ARCN1, ARFGAP1, ARFGAP3, ARFGEF1, ARFGEF3, ARHGEF6, ARID4A, ARIH1, ARIH2, ARPP19, ARRDC3, ARSB, ARSD, ASB1, ASB16, ASB3, …
GO:0036211	protein modification process	GO_BiologicalProcess-GOA_09.02.2016_16h18	1.1e-22	7.9e-20	3.5e-34	1.9e-32	[4, 5]	Group12	24.2432	985	[AAAS, AAK1, ABCA1, ABI1, ABL2, ACP1, ACVR1, ACVR1B, ACVR2B, ADAM10, ADAMTS7, ADCY3, ADCY6, ADCY9, ADH5, ADM2, ADNP, ADRBK1, AKAP1, AKAP6, AKR1B1, AKT2, AKT3, AKTIP, ALG2, ALG6, ALPK3, AMFR, ANAPC1, ANAPC15, ANAPC5, ANK3, ANTXR1, APBB1, APLP2, APP, ARCN1, ARFGAP1, ARFGAP3, ARFGEF1, ARFGEF3, ARHGEF6, ARID4A, ARIH1, ARIH2, ARPP19, ARRDC3, ARSB, ARSD, ASB1, ASB16, ASB3, ASB7, ASXL1, ATF2, ATF3, ATG4…
GO:0044267	cellular protein metabolic process	GO_BiologicalProcess-GOA_09.02.2016_16h18	9.6e-28	6.5e-25	3.5e-34	1.9e-32	[4, 5]	Group12	23.8658	1252	[AAAS, AAK1, AARS, ABCA1, ABI1, ABL2, ACD, ACP1, ACTB, ACVR1, ACVR1B, ACVR2B, ADAM10, ADAMTS12, ADAMTS7, ADCY3, ADCY6, ADCY9, ADD1, ADH5, ADM2, ADNP, ADRBK1, AGO3, AKAP1, AKAP6, AKIRIN2, AKR1B1, AKT2, AKT3, AKTIP, ALG2, ALG6, ALPK3, AMFR, ANAPC1, ANAPC15, ANAPC5, ANK3, ANOS1, ANTXR1, APBB1, APEX1, APLP2, APP, ARCN1, ARFGAP1, ARFGAP3, ARFGEF1, ARFGEF3, ARHGEF6, ARID4A, ARIH1, ARIH2, ARPP19, ARRDC3…
GO:0051246	regulation of protein metabolic process	GO_BiologicalProcess-GOA_09.02.2016_16h18	1.3e-12	7.9e-10	3.5e-34	1.9e-32	[4, 5]	Group12	23.8459	656	[AARS, ABI1, ABL2, ACVR1, ACVR1B, ACVR2B, ADCY3, ADCY6, ADCY9, ADNP, AGO3, AKAP1, AKAP6, AKIRIN2, AKR1B1, AKT2, AKTIP, ANAPC1, ANAPC15, ANAPC5, ANOS1, APBB1, APEX1, APLP2, APP, ARFGEF1, ARFGEF3, ARIH1, ARIH2, ARPP19, ARRDC3, ASB1, ATF3, ATG4B, ATP6AP1, ATRAID, ATXN2, AURKA, BBC3, BBS7, BCCIP, BCL2, BCL2L13, BCL6, BHLHE40, BIRC5, BIRC6, BMP2, BMP7, BNIP2, BOK, BRAF, BRAT1, BRCA1, BRD4, BRD7, BTG2,…
GO:0032268	regulation of cellular protein metabolic process	GO_BiologicalProcess-GOA_09.02.2016_16h18	4.6e-12	2.7e-09	3.5e-34	1.9e-32	[4, 5, 6]	Group12	23.936	613	[AARS, ABI1, ABL2, ACVR1, ACVR1B, ACVR2B, ADCY3, ADCY6, ADCY9, ADNP, AGO3, AKAP1, AKAP6, AKIRIN2, AKR1B1, AKT2, AKTIP, ANAPC1, ANAPC15, ANAPC5, ANOS1, APEX1, APLP2, APP, ARFGEF1, ARFGEF3, ARIH1, ARIH2, ARPP19, ARRDC3, ATF3, ATP6AP1, ATRAID, ATXN2, AURKA, BBC3, BBS7, BCCIP, BCL2, BCL2L13, BCL6, BHLHE40, BIRC5, BIRC6, BMP2, BMP7, BNIP2, BOK, BRAF, BRAT1, BRCA1, BRD4, BRD7, BTG2, BUB1, BUB1B, BUB3, …
GO:0044710	single-organism metabolic process	GO_BiologicalProcess-GOA_09.02.2016_16h18	1.7e-08	9.5e-06	1.7e-08	5.6e-07	[2]	Group13	21.238	1242	[AAAS, AARS, AASS, ABCA1, ABCC4, ABCC5, ABCD3, ABCD4, ABHD12, ABHD3, ABHD4, ABHD5, ABL2, ACACA, ACAD11, ACAD8, ACBD3, ACD, ACER3, ACOT13, ACSL3, ACVR1, ACVR1B, ACVR2B, ADAM10, ADAMTS3, ADAMTS7, ADCY3, ADCY6, ADCY9, ADH5, ADIPOR1, ADNP, ADPGK, ADRBK1, AGO3, AGPAT4, AGRN, AHCY, AHCYL2, AHI1, AK2, AK7, AK9, AKAP12, AKAP6, AKR1B1, AKT2, ALDH16A1, ALDH18A1, ALDH1A1, ALDH1L2, ALDH5A1, ALDH7A1, ALG2, AL…
GO:0044699	single-organism process	GO_BiologicalProcess-GOA_09.02.2016_16h18	1.9e-05	0.0089	1.9e-05	0.00017	[1]	Group14	19.4861	2700	[AAAS, AAK1, AARS, AASS, ABCA1, ABCC4, ABCC5, ABCD3, ABCD4, ABHD12, ABHD3, ABHD4, ABHD5, ABI1, ABL2, ACACA, ACAD11, ACAD8, ACBD3, ACD, ACER3, ACOT13, ACSL3, ACTA2, ACTB, ACTC1, ACTG1, ACTR1A, ACVR1, ACVR1B, ACVR2B, ADAM10, ADAM11, ADAM12, ADAM19, ADAMTS12, ADAMTS18, ADAMTS3, ADAMTS7, ADAMTS9, ADCY3, ADCY6, ADCY9, ADD1, ADGRA3, ADGRV1, ADH5, ADIPOR1, ADM2, ADNP, ADPGK, ADRBK1, AEN, AFF3, AFF4, AGF…
GO:0044763	single-organism cellular process	GO_BiologicalProcess-GOA_09.02.2016_16h18	3.2e-07	0.00016	1.9e-05	0.00017	[2]	Group14	19.7627	2515	[AAAS, AAK1, AARS, AASS, ABCA1, ABCC4, ABCC5, ABCD3, ABCD4, ABHD12, ABHD3, ABHD4, ABHD5, ABI1, ABL2, ACACA, ACAD11, ACAD8, ACD, ACER3, ACOT13, ACSL3, ACTA2, ACTB, ACTC1, ACTG1, ACTR1A, ACVR1, ACVR1B, ACVR2B, ADAM10, ADAM11, ADAM12, ADAMTS12, ADAMTS18, ADAMTS3, ADAMTS7, ADCY3, ADCY6, ADCY9, ADD1, ADGRA3, ADGRV1, ADH5, ADIPOR1, ADM2, ADNP, ADPGK, ADRBK1, AEN, AFF4, AGFG1, AGO3, AGPAT4, AGRN, AHCY, …
GO:0044764	multi-organism cellular process	GO_BiologicalProcess-GOA_09.02.2016_16h18	2.9e-07	0.00014	8e-07	1.6e-05	[2]	Group15	25.848	221	[AAAS, ABI1, ADRBK1, AP1G1, AP1S1, ARF1, ATG16L2, ATP6V1H, BANF1, BCL2, BNIP3, BRD4, BTBD17, BUB1, CAMLG, CBX5, CCNT1, CCNT2, CD46, CENPU, CHD1, CHMP3, CHMP6, CRTC1, CRTC2, CTBP1, CTSB, CXADR, DAG1, DDX11, DDX39B, DEK, DLG1, DYNLL1, DYNLT1, EFNB3, EIF4A1, EIF4A2, ELL, EP300, EPHA2, EPS15, ERCC2, FADD, FBXW7, FDPS, GAS6, GBF1, GTF2E2, GTF2F1, GTF2H2, GTF2H5, H2AFX, HACD3, HDAC1, HIPK2, HLA-A, HMGA…
GO:0044403	symbiosis, encompassing mutualism through parasitism	GO_BiologicalProcess-GOA_09.02.2016_16h18	7e-07	0.00034	8e-07	1.6e-05	[3]	Group15	25.4813	225	[AAAS, ABI1, ADRBK1, AP1G1, AP1S1, ARF1, ATG16L2, ATP6V1H, BANF1, BCL2, BNIP3, BRD4, BTBD17, BUB1, CAMLG, CBX5, CCNT1, CCNT2, CD46, CENPU, CHD1, CHMP3, CHMP6, CRTC1, CRTC2, CTBP1, CTSB, CXADR, DAG1, DDX11, DDX39B, DEK, DLG1, DYNLL1, DYNLT1, EFNB3, EIF4A1, EIF4A2, ELL, EP300, EPHA2, EPS15, ERCC2, FADD, FBXW7, FDPS, FUCA2, GAS6, GBF1, GTF2E2, GTF2F1, GTF2H2, GTF2H5, H2AFX, HACD3, HDAC1, HIPK2, HLA-…
GO:0016032	viral process	GO_BiologicalProcess-GOA_09.02.2016_16h18	1.4e-07	7.5e-05	8e-07	1.6e-05	[3, 4]	Group15	26.0714	219	[AAAS, ABI1, ADRBK1, AP1G1, AP1S1, ARF1, ATG16L2, ATP6V1H, BANF1, BCL2, BNIP3, BRD4, BTBD17, BUB1, CAMLG, CBX5, CCNT1, CCNT2, CD46, CENPU, CHD1, CHMP3, CHMP6, CRTC1, CRTC2, CTBP1, CTSB, CXADR, DAG1, DDX11, DDX39B, DEK, DLG1, DYNLL1, DYNLT1, EFNB3, EIF4A1, EIF4A2, ELL, EP300, EPHA2, EPS15, ERCC2, FADD, FBXW7, FDPS, GAS6, GBF1, GTF2E2, GTF2F1, GTF2H2, GTF2H5, H2AFX, HACD3, HDAC1, HIPK2, HLA-A, HMGA…
GO:0003008	system process	GO_BiologicalProcess-GOA_09.02.2016_16h18	9.3e-13	5.6e-10	9.3e-13	4e-11	[2]	Group16	13.4238	287	[AAAS, AARS, ABL2, ACD, ACTA2, ACTC1, ADCY3, ADCY6, ADCY9, ADGRV1, ADH5, ADM2, ADNP, ADRBK1, AKAP1, AKAP6, AKR1B1, ALDH7A1, AMFR, ANK3, APLP2, APP, AQP7, ARHGEF11, ASIC1, ATAD1, ATP1B3, ATP2A2, ATXN2, BBS10, BBS7, BCL2, BCR, BRAF, BTG2, CACNA1C, CAMK2D, CAMTA1, CCDC6, CCDC66, CDKN1B, CEBPB, CHRM3, CHRNA1, CHRNA3, CHRNA7, CHRNB4, CHST10, CLN5, CLN6, CNGB1, CNNM4, CNTN2, CNTNAP1, COL11A1, COL18A1, …
GO:0050877	neurological system process	GO_BiologicalProcess-GOA_09.02.2016_16h18	3.7e-13	2.2e-10	9.3e-13	4e-11	[3]	Group16	11.9201	167	[AAAS, AARS, ABL2, ACD, ADCY3, ADGRV1, ADNP, ALDH7A1, AMFR, ANK3, APLP2, APP, ASIC1, ATAD1, ATXN2, BBS10, BBS7, BCR, BRAF, BTG2, CACNA1C, CAMTA1, CCDC6, CCDC66, CDKN1B, CEBPB, CHRNA1, CHRNA7, CHRNB4, CHST10, CLN5, CLN6, CNGB1, CNNM4, CNTN2, CNTNAP1, COL11A1, COL18A1, COL1A1, COL2A1, CPAMD8, CRTC1, CRYZ, CTNNA2, CTNS, CYFIP1, DDX11, DFNB31, DIAPH1, DLL4, DNM1, DRAM2, DRD4, E2F1, EGR2, EIF2AK3, EIF…
GO:0007600	sensory perception	GO_BiologicalProcess-GOA_09.02.2016_16h18	1.4e-26	9.4e-24	9.3e-13	4e-11	[4]	Group16	7.40019	76	[ADCY3, ADGRV1, ALDH7A1, ASIC1, BBS10, BBS7, CCDC6, CCDC66, CDKN1B, CLN5, CLN6, CNGB1, CNNM4, COL11A1, COL18A1, COL1A1, COL2A1, CPAMD8, CRYZ, DFNB31, DIAPH1, DLL4, DNM1, DRAM2, E2F1, EPHB1, F2R, FAM161A, FBXO11, FGFR1, FZD2, FZD4, GJD2, GNAL, GRIN2A, GRIN2B, KIT, LAMB2, LAMC1, LMNB2, LRIG1, LRIG2, MECP2, NGFR, NOB1, NR2E1, NR2F6, NTSR1, PAX6, PPT1, PRR4, PTCH1, RAB3A, RGS16, RIPK2, RPGR, SCN3B, S…
GO:0051276	chromosome organization	GO_BiologicalProcess-GOA_09.02.2016_16h18	9e-33	6.2e-30	9e-33	4.8e-31	[4]	Group17	33.1304	381	[ACD, ACTB, ACTR6, AEBP2, ANAPC1, ANAPC15, ANAPC5, ANP32E, ANTXR1, APBB1, APEX1, ARID1A, ARID4A, ARID5B, ASCC3, ASF1B, ASXL1, ATAD2, ATF2, ATR, AURKA, AURKB, BAHCC1, BAZ2A, BCL6, BEND3, BHLHE40, BRCA1, BRCA2, BRD1, BRD2, BRD4, BRD7, BRD8, BRIP1, BUB1, BUB1B, BUB3, C6orf89, CAMK2D, CASC5, CBX2, CBX4, CBX6, CCNB1, CCND1, CCT5, CCT8, CDC16, CDC20, CDC23, CDC45, CDC6, CDCA5, CDCA8, CDK1, CDK2, CECR2,…
GO:0006325	chromatin organization	GO_BiologicalProcess-GOA_09.02.2016_16h18	1.4e-18	9.2e-16	9e-33	4.8e-31	[4, 5]	Group17	31.8538	244	[ACTB, ACTR6, AEBP2, ANP32E, APBB1, ARID1A, ARID4A, ARID5B, ASF1B, ASXL1, ATAD2, ATF2, AURKA, AURKB, BAHCC1, BAZ2A, BCL6, BEND3, BHLHE40, BRCA1, BRCA2, BRD1, BRD2, BRD4, BRD7, BRD8, C6orf89, CAMK2D, CASC5, CBX2, CBX4, CBX6, CCNB1, CCND1, CDC45, CDK1, CDK2, CECR2, CENPC, CENPH, CENPI, CENPL, CENPM, CENPO, CENPP, CENPU, CENPV, CHAF1A, CHAF1B, CHD1, CHD2, CHRAC1, CHTOP, CRTC2, CTBP1, CTCF, DAPK3, DD…
GO:0016570	histone modification	GO_BiologicalProcess-GOA_09.02.2016_16h18	1.7e-10	1e-07	9e-33	4.8e-31	[3, 4, 5, 6, 7, 8]	Group17	31.5068	138	[APBB1, ARID4A, ASXL1, ATF2, AURKA, AURKB, BAZ2A, BCL6, BEND3, BRCA1, BRCA2, BRD1, BRD4, BRD7, BRD8, C6orf89, CAMK2D, CCNB1, CDK1, CDK2, CHTOP, CRTC2, CTBP1, CTCF, DDB2, DEPDC1B, DMAP1, DOT1L, DR1, EED, EID1, ELP4, EP300, EYA2, EZH1, FBLL1, FLCN, H2AFY, HAT1, HDAC1, HDAC2, HDAC5, HDAC7, HDAC8, HLCS, HMGA2, ING4, ING5, JAK2, JDP2, KALRN, KANSL2, KAT2A, KAT2B, KAT6A, KAT8, KDM2B, KDM3A, KDM4A, KDM4…
GO:0051098	regulation of binding	GO_BiologicalProcess-GOA_09.02.2016_16h18	9.7e-06	0.0045	9.7e-06	0.00012	[3]	Group18	29.3333	88	[ABL2, ACD, ADD1, ADNP, AKTIP, AMFR, ANTXR1, APLP2, APP, ATR, AURKA, AURKB, BAMBI, BCL2, BMP2, BRD4, BTAF1, CCPG1, CEBPG, CPNE1, CRBN, CSNK1A1, CSNK1E, CTNNBIP1, DACT1, DDIT3, DOT1L, E2F1, EBF2, EIF2AK3, EP300, EPB41, EPHA4, ERCC2, FKBP1A, FLOT1, GOLGA2, GSK3B, HABP4, HDAC2, HDAC5, HERPUD1, HEY1, HIPK2, HJURP, HMGA2, HMGB1, HMGB2, HNRNPK, HSPA5, ID2, IFIT2, ITGB1BP1, JAK2, JUN, KAT2A, KAT2B, KLF4…
GO:0051129	negative regulation of cellular component organization	GO_BiologicalProcess-GOA_09.02.2016_16h18	1e-06	0.00052	1e-06	2e-05	[3, 4, 5]	Group19	26.4012	179	[ACD, ADCY6, ADD1, AKR1B1, ANAPC1, ANAPC15, ANAPC5, ARFGEF1, ARHGEF1, ARPIN, ATAD2, ATXN2, AURKA, AURKB, BMP7, BNIP3, BRCA1, BUB1, BUB1B, BUB3, BUD31, CAPZA1, CCNB1, CDC16, CDC20, CDC23, CDK5R1, CDK5RAP2, CENPF, CIT, CKAP2, CLASP2, CORO1C, CRBN, CSNK2A1, CST3, CTBP1, CTNNBIP1, DACT1, DGUOK, DNAJB2, DNAJB6, DNM2, DPYSL3, DRAXIN, DUSP1, DYNLL1, EIF4EBP1, EPHA4, EPHA7, ERCC1, ESPL1, EVI5L, FAT3, FBX…
GO:0010639	negative regulation of organelle organization	GO_BiologicalProcess-GOA_09.02.2016_16h18	4.1e-06	0.0019	1e-06	2e-05	[4, 5, 6]	Group19	29.023	101	[ACD, ADD1, ANAPC1, ANAPC15, ANAPC5, ARFGEF1, ARPIN, ATAD2, AURKA, AURKB, BMP7, BNIP3, BRCA1, BUB1, BUB1B, BUB3, CAPZA1, CCNB1, CDC16, CDC20, CDC23, CDK5RAP2, CENPF, CKAP2, CLASP2, CSNK2A1, CTBP1, DUSP1, DYNLL1, ERCC1, ESPL1, EVI5L, FBXO43, FEZ1, FGFR3, FHOD3, FKBP4, FLCN, FMNL3, GEN1, H2AFY, HMGA1, HNRNPC, HNRNPU, INPP5K, INSIG1, KDM3A, KDM4A, LMNA, LZTS1, MAD2L1, MCRS1, MECP2, MSH2, MTBP, MTF2,…
GO:0048519	negative regulation of biological process	GO_BiologicalProcess-GOA_09.02.2016_16h18	2.6e-20	1.7e-17	2.6e-20	1.2e-18	[1, 2, 3]	Group2	23.3785	1121	[AAAS, AARS, ABCA1, ABHD5, ABI1, ABL2, ACD, ACTC1, ACVR1, ACVR1B, ACVR2B, ADAM10, ADAMTS12, ADAMTS18, ADAMTS7, ADCY6, ADD1, ADGRV1, ADIPOR1, ADNP, ADRBK1, AEBP2, AGO3, AHI1, AKAP1, AKAP6, AKIRIN2, AKR1B1, AKT2, ANAPC1, ANAPC15, ANAPC5, ANK3, ANOS1, ANP32E, ANTXR1, APBB1, APCDD1, APEX1, APLP2, APP, ARF1, ARFGEF1, ARFGEF3, ARHGAP21, ARHGEF1, ARID1A, ARID4A, ARID5B, ARL2, ARNT2, ARPIN, ARPP19, ARRDC…
GO:0009892	negative regulation of metabolic process	GO_BiologicalProcess-GOA_09.02.2016_16h18	4.1e-18	2.6e-15	2.6e-20	1.2e-18	[2, 3, 4]	Group2	24.9023	701	[AAAS, ACD, ACVR1B, ACVR2B, ADNP, AEBP2, AGO3, AKAP1, AKAP6, AKIRIN2, AKR1B1, AKT2, ANAPC1, ANAPC15, ANAPC5, ANOS1, ANP32E, ANTXR1, APBB1, APEX1, APLP2, APP, ARFGEF1, ARFGEF3, ARID1A, ARID4A, ARID5B, ARL2, ARPP19, ARRDC3, ASB1, ASCL1, ASXL1, ATAD2, ATCAY, ATF2, ATF3, ATF5, ATR, ATRAID, ATXN1L, ATXN2, AURKB, BACH2, BAHCC1, BAZ2A, BCL2, BCL6, BCL7A, BCLAF1, BEND3, BHLHE40, BHLHE41, BIRC5, BIRC6, BM…
GO:0048523	negative regulation of cellular process	GO_BiologicalProcess-GOA_09.02.2016_16h18	8.6e-22	5.6e-19	2.6e-20	1.2e-18	[2, 3, 4]	Group2	23.8387	1052	[AARS, ABCA1, ABI1, ABL2, ACD, ACTC1, ACVR1, ACVR1B, ACVR2B, ADAM10, ADAMTS12, ADAMTS18, ADAMTS7, ADCY6, ADD1, ADGRV1, ADIPOR1, ADNP, ADRBK1, AEBP2, AGO3, AHI1, AKAP1, AKAP6, AKIRIN2, AKR1B1, AKT2, ANAPC1, ANAPC15, ANAPC5, ANK3, ANOS1, ANTXR1, APBB1, APCDD1, APEX1, APLP2, APP, ARF1, ARFGEF1, ARFGEF3, ARHGAP21, ARHGEF1, ARID1A, ARID4A, ARID5B, ARNT2, ARPIN, ASB1, ASCL1, ASIC1, ASNS, ASPM, ASXL1, A…
GO:0009890	negative regulation of biosynthetic process	GO_BiologicalProcess-GOA_09.02.2016_16h18	1.1e-15	7.1e-13	2.6e-20	1.2e-18	[3, 4, 5]	Group2	26.6667	424	[ACD, ACVR2B, AEBP2, AGO3, AKAP6, AKIRIN2, AKR1B1, ANTXR1, APBB1, APEX1, ARID1A, ARID4A, ARID5B, ASB1, ASCL1, ASXL1, ATAD2, ATF2, ATF3, ATF5, ATR, ATXN1L, AURKB, BACH2, BAHCC1, BAZ2A, BCL6, BCL7A, BCLAF1, BEND3, BHLHE40, BHLHE41, BIRC5, BMP2, BMP7, BRCA1, BRCA2, BRD7, BRIP1, BTAF1, BTG2, BUD31, CALR, CBX2, CBX4, CBX5, CBX6, CCAR1, CCAR2, CCND1, CD276, CDC45, CDC6, CDK5R1, CDKN1B, CEBPB, CEBPG, CE…
GO:0010605	negative regulation of macromolecule metabolic process	GO_BiologicalProcess-GOA_09.02.2016_16h18	2.7e-20	1.8e-17	2.6e-20	1.2e-18	[3, 4, 5]	Group2	25.7654	648	[AAAS, ACD, ACVR1B, ACVR2B, ADNP, AEBP2, AGO3, AKAP1, AKIRIN2, AKR1B1, AKT2, ANAPC1, ANAPC15, ANAPC5, ANOS1, ANTXR1, APBB1, APEX1, APLP2, APP, ARFGEF3, ARID1A, ARID4A, ARID5B, ASB1, ASCL1, ASXL1, ATAD2, ATF2, ATF3, ATF5, ATR, ATRAID, ATXN1L, ATXN2, AURKB, BACH2, BAHCC1, BAZ2A, BCL6, BCL7A, BCLAF1, BEND3, BHLHE40, BHLHE41, BIRC5, BIRC6, BMP2, BMP7, BRCA1, BRCA2, BRD7, BRIP1, BTAF1, BTG2, BUB1, BUB…
GO:0031324	negative regulation of cellular metabolic process	GO_BiologicalProcess-GOA_09.02.2016_16h18	1.5e-16	1e-13	2.6e-20	1.2e-18	[3, 4, 5]	Group2	25.0401	625	[ACD, ACVR2B, AEBP2, AGO3, AKAP1, AKAP6, AKIRIN2, AKT2, ANAPC1, ANAPC15, ANAPC5, ANOS1, ANTXR1, APEX1, APLP2, APP, ARFGEF3, ARID1A, ARID4A, ARID5B, ASB1, ASCL1, ASXL1, ATAD2, ATCAY, ATF2, ATF3, ATF5, ATR, ATRAID, ATXN1L, ATXN2, AURKB, BACH2, BAHCC1, BAZ2A, BCL2, BCL6, BCL7A, BCLAF1, BEND3, BHLHE40, BHLHE41, BIRC5, BIRC6, BMP2, BMP7, BNIP3, BRCA1, BRCA2, BRD7, BRIP1, BTAF1, BTG2, BUB1, BUB1B, BUB3…
GO:0051172	negative regulation of nitrogen compound metabolic process	GO_BiologicalProcess-GOA_09.02.2016_16h18	8.5e-18	5.4e-15	2.6e-20	1.2e-18	[3, 4, 5]	Group2	27.2784	434	[ACD, ACVR2B, AEBP2, AGO3, AKAP6, AKIRIN2, AKT2, ANTXR1, APEX1, ARID1A, ARID4A, ARID5B, ASCL1, ASXL1, ATAD2, ATCAY, ATF2, ATF3, ATF5, ATR, ATXN1L, AURKB, BACH2, BAHCC1, BAZ2A, BCL6, BCL7A, BCLAF1, BEND3, BHLHE40, BHLHE41, BIRC5, BMP2, BMP7, BRCA1, BRCA2, BRD7, BRIP1, BTAF1, BTG2, BUD31, CALR, CBX2, CBX4, CBX5, CBX6, CCAR1, CCAR2, CCND1, CCNT1, CDC45, CDC6, CDK5R1, CDKN1B, CEBPB, CEBPG, CELF1, CEN…
GO:0010558	negative regulation of macromolecule biosynthetic process	GO_BiologicalProcess-GOA_09.02.2016_16h18	2.2e-17	1.4e-14	2.6e-20	1.2e-18	[4, 5, 6]	Group2	27.4366	411	[ACD, ACVR2B, AEBP2, AGO3, AKIRIN2, AKR1B1, ANTXR1, APBB1, APEX1, ARID1A, ARID4A, ARID5B, ASB1, ASCL1, ASXL1, ATAD2, ATF2, ATF3, ATF5, ATR, ATXN1L, AURKB, BACH2, BAHCC1, BAZ2A, BCL6, BCL7A, BCLAF1, BEND3, BHLHE40, BHLHE41, BIRC5, BMP2, BMP7, BRCA1, BRCA2, BRD7, BRIP1, BTAF1, BTG2, CALR, CBX2, CBX4, CBX5, CBX6, CCAR1, CCAR2, CCND1, CD276, CDC45, CDC6, CDK5R1, CDKN1B, CEBPB, CEBPG, CELF1, CENPF, CH…
GO:0010629	negative regulation of gene expression	GO_BiologicalProcess-GOA_09.02.2016_16h18	3e-17	1.9e-14	2.6e-20	1.2e-18	[4, 5, 6]	Group2	27.1016	432	[AAAS, ACVR1B, ACVR2B, ADNP, AEBP2, AGO3, AKIRIN2, AKT2, APEX1, ARID1A, ARID4A, ARID5B, ASCL1, ASXL1, ATAD2, ATF2, ATF3, ATF5, ATXN1L, AURKB, BACH2, BAHCC1, BAZ2A, BCL6, BCL7A, BCLAF1, BEND3, BHLHE40, BHLHE41, BIRC5, BMP2, BMP7, BRCA1, BRD7, BRIP1, BTAF1, BTG2, CALR, CBX2, CBX4, CBX5, CBX6, CCAR2, CCNB1, CCND1, CCNT1, CD46, CDC45, CDK2, CDK5R1, CDKN1A, CDKN1B, CEBPB, CEBPG, CELF1, CENPF, CHAC1, C…
GO:0031327	negative regulation of cellular biosynthetic process	GO_BiologicalProcess-GOA_09.02.2016_16h18	3.7e-16	2.3e-13	2.6e-20	1.2e-18	[4, 5, 6]	Group2	26.8886	420	[ACD, ACVR2B, AEBP2, AGO3, AKAP6, AKIRIN2, ANTXR1, APEX1, ARID1A, ARID4A, ARID5B, ASB1, ASCL1, ASXL1, ATAD2, ATF2, ATF3, ATF5, ATR, ATXN1L, AURKB, BACH2, BAHCC1, BAZ2A, BCL6, BCL7A, BCLAF1, BEND3, BHLHE40, BHLHE41, BIRC5, BMP2, BMP7, BRCA1, BRCA2, BRD7, BRIP1, BTAF1, BTG2, BUD31, CALR, CBX2, CBX4, CBX5, CBX6, CCAR1, CCAR2, CCND1, CD276, CDC45, CDC6, CDK5R1, CDKN1B, CEBPB, CEBPG, CELF1, CENPF, CHO…
GO:0045934	negative regulation of nucleobase-containing compound metabolic process	GO_BiologicalProcess-GOA_09.02.2016_16h18	5.5e-16	3.4e-13	2.6e-20	1.2e-18	[4, 5, 6]	Group2	27.1302	398	[ACD, ACVR2B, AEBP2, AKAP6, AKIRIN2, AKT2, ANTXR1, APEX1, ARID1A, ARID4A, ARID5B, ASCL1, ASXL1, ATAD2, ATF2, ATF3, ATF5, ATR, ATXN1L, AURKB, BACH2, BAHCC1, BAZ2A, BCL6, BCL7A, BCLAF1, BEND3, BHLHE40, BHLHE41, BIRC5, BMP2, BMP7, BRCA1, BRCA2, BRD7, BRIP1, BTAF1, BTG2, BUD31, CALR, CBX2, CBX4, CBX5, CBX6, CCAR1, CCAR2, CCND1, CCNT1, CDC45, CDC6, CDK5R1, CDKN1B, CEBPB, CEBPG, CENPF, CHORDC1, CHP1, C…
GO:0051248	negative regulation of protein metabolic process	GO_BiologicalProcess-GOA_09.02.2016_16h18	2.2e-07	0.00011	2.6e-20	1.2e-18	[4, 5, 6]	Group2	24.8062	288	[AGO3, AKAP1, AKT2, ANAPC1, ANAPC15, ANAPC5, ANOS1, APBB1, APEX1, APLP2, APP, ARFGEF3, ASB1, ATF3, ATRAID, BIRC5, BIRC6, BMP7, BRCA1, BTG2, BUB1, BUB1B, BUB3, C5, CALR, CAMK2N1, CASC5, CAST, CCAR2, CCNB1, CD276, CD46, CDC16, CDC20, CDC23, CDKN1A, CDKN1B, CDKN2C, CELF1, CENPF, CEP192, CEP85, CHAC1, CHORDC1, CHP1, CIRBP, CNKSR3, CNOT1, CNOT3, CORO1C, CPAMD8, CRB2, CRIM1, CRIPAK, CRTAP, CRY1, CRY2, …
GO:0032269	negative regulation of cellular protein metabolic process	GO_BiologicalProcess-GOA_09.02.2016_16h18	3.7e-08	2e-05	2.6e-20	1.2e-18	[4, 5, 6, 7]	Group2	25.4362	277	[AGO3, AKAP1, AKT2, ANAPC1, ANAPC15, ANAPC5, ANOS1, APEX1, APLP2, APP, ARFGEF3, ATF3, ATRAID, BIRC5, BIRC6, BMP7, BRCA1, BTG2, BUB1, BUB1B, BUB3, C5, CALR, CAMK2N1, CASC5, CAST, CCAR2, CCNB1, CD46, CDC16, CDC20, CDC23, CDKN1A, CDKN1B, CDKN2C, CELF1, CENPF, CEP192, CEP85, CHAC1, CHORDC1, CHP1, CIRBP, CNKSR3, CNOT1, CNOT3, CORO1C, CPAMD8, CRB2, CRIM1, CRIPAK, CRTAP, CRY1, CRY2, CSNK2A1, CSRNP2, CST…
GO:0051253	negative regulation of RNA metabolic process	GO_BiologicalProcess-GOA_09.02.2016_16h18	1.4e-14	8.6e-12	2.6e-20	1.2e-18	[4, 5, 6, 7, 8]	Group2	27.2176	359	[ACVR2B, AEBP2, AKIRIN2, AKT2, APEX1, ARID1A, ARID4A, ARID5B, ASCL1, ASXL1, ATAD2, ATF2, ATF3, ATF5, ATXN1L, AURKB, BACH2, BAHCC1, BAZ2A, BCL6, BCL7A, BCLAF1, BEND3, BHLHE40, BHLHE41, BIRC5, BMP2, BMP7, BRCA1, BRD7, BRIP1, BTAF1, BTG2, CALR, CBX2, CBX4, CBX5, CBX6, CCAR1, CCAR2, CCND1, CCNT1, CDC45, CDK5R1, CDKN1B, CEBPB, CEBPG, CENPF, CHORDC1, CHP1, CIC, CIR1, CITED2, CNOT1, COQ7, CREBRF, CREBZF…
GO:0051128	regulation of cellular component organization	GO_BiologicalProcess-GOA_09.02.2016_16h18	3.4e-17	2.1e-14	3.4e-17	1.6e-15	[3, 4]	Group20	25.4043	597	[AAK1, ABL2, ACD, ACSL3, ACVR1B, ADAM10, ADCY6, ADD1, ADIPOR1, ADNP, AGRN, AHI1, AKAP6, AKR1B1, AKT2, ANAPC1, ANAPC15, ANAPC5, ANLN, ANTXR1, APBB1, APEX1, APPL1, ARF1, ARFGAP1, ARFGAP3, ARFGEF1, ARFIP2, ARHGAP21, ARHGEF1, ARHGEF11, ARIH2, ARL2, ARPC4, ARPIN, ARSB, ATAD1, ATAD2, ATF5, ATR, ATXN2, AURKA, AURKB, BAIAP2, BAIAP2L1, BAMBI, BBC3, BBS10, BCL2, BCL6, BCL9L, BCLAF1, BCR, BIRC5, BMP2, BMP7,…
GO:0051130	positive regulation of cellular component organization	GO_BiologicalProcess-GOA_09.02.2016_16h18	4.8e-07	0.00024	3.4e-17	1.6e-15	[3, 4, 5]	Group20	24.5066	298	[ABL2, ACD, ACSL3, ADNP, AGRN, AHI1, AKR1B1, AKT2, ANTXR1, APBB1, APEX1, ARF1, ARFIP2, ARIH2, ARL2, ARPC4, ARPIN, ARSB, ATAD1, ATR, AURKA, AURKB, BAIAP2, BAIAP2L1, BAMBI, BBC3, BCL2, BCL6, BCL9L, BCLAF1, BCR, BIRC5, BMP2, BMP7, BNIP3, BRAF, BRCA1, BRD7, BRK1, BUD31, C6orf89, CALR, CAMK1D, CCNB1, CCT5, CCT8, CD47, CD63, CDC20, CDC42EP1, CDC42EP2, CDCA5, CDH2, CDH4, CDK5R1, CDKN1B, CFL2, CHAF1B, CH…
GO:0033043	regulation of organelle organization	GO_BiologicalProcess-GOA_09.02.2016_16h18	5.6e-12	3.3e-09	3.4e-17	1.6e-15	[4, 5]	Group20	26.8209	313	[ABL2, ACD, ADD1, AKT2, ANAPC1, ANAPC15, ANAPC5, ANLN, ANTXR1, APEX1, ARF1, ARFGEF1, ARFIP2, ARIH2, ARL2, ARPC4, ARPIN, ATAD2, ATF5, ATR, ATXN2, AURKA, AURKB, BAIAP2, BAIAP2L1, BBC3, BCL2, BCL6, BIRC5, BMP7, BNIP3, BORA, BRAF, BRCA1, BRD7, BRK1, BUB1, BUB1B, BUB3, BUD31, C6orf89, CALR, CAMK2D, CAPN2, CAPZA1, CCNB1, CCT5, CCT8, CDC16, CDC20, CDC23, CDC42EP1, CDC42EP2, CDC45, CDC6, CDCA5, CDK5R1, C…
GO:0006403	RNA localization	GO_BiologicalProcess-GOA_09.02.2016_16h18	1.1e-05	0.0052	1.1e-05	0.00013	[3]	Group21	31.4286	66	[AAAS, AGFG1, ALKBH5, ANTXR1, ATR, ATXN2, CCT5, CCT8, CHTOP, CKAP5, DDX19A, DDX39B, DKC1, EXOSC3, FLOT1, FMR1, HNRNPA2B1, HNRNPA3, HTT, IGF2BP1, IGF2BP3, KHSRP, MAGOH, MRPL18, NCBP2, NCBP3, NDC1, NHP2, NOP58, NUDT4, NUP107, NUP205, NUP210, NUP54, NUP58, NUP62, NXF1, PABPN1, PNPT1, POM121, QKI, RAN, RBM8A, RUVBL1, SARNP, SEH1L, SETD2, SMG1, SMG7, SRSF10, SRSF11, SRSF2, SRSF3, SRSF4, SRSF5, SRSF6, …
GO:0051236	establishment of RNA localization	GO_BiologicalProcess-GOA_09.02.2016_16h18	2.6e-05	0.011	1.1e-05	0.00013	[3, 4]	Group21	32.2034	57	[AAAS, AGFG1, ALKBH5, ANTXR1, ATR, ATXN2, CHTOP, CKAP5, DDX19A, DDX39B, FLOT1, FMR1, HNRNPA2B1, HNRNPA3, HTT, IGF2BP1, IGF2BP3, KHSRP, MAGOH, MRPL18, NCBP2, NCBP3, NDC1, NUDT4, NUP107, NUP205, NUP210, NUP54, NUP58, NUP62, NXF1, PABPN1, PNPT1, POM121, QKI, RAN, RBM8A, SARNP, SEH1L, SETD2, SMG1, SMG7, SRSF10, SRSF11, SRSF2, SRSF3, SRSF4, SRSF5, SRSF6, SRSF9, SUPT6H, THOC1, THOC2, U2AF2, UPF1, XPO1,…
GO:0050658	RNA transport	GO_BiologicalProcess-GOA_09.02.2016_16h18	3e-05	0.013	1.1e-05	0.00013	[4, 5, 7]	Group21	32.1637	55	[AAAS, AGFG1, ALKBH5, ATXN2, CHTOP, CKAP5, DDX19A, DDX39B, FLOT1, FMR1, HNRNPA2B1, HNRNPA3, HTT, IGF2BP1, IGF2BP3, KHSRP, MAGOH, MRPL18, NCBP2, NCBP3, NDC1, NUDT4, NUP107, NUP205, NUP210, NUP54, NUP58, NUP62, NXF1, PABPN1, PNPT1, POM121, QKI, RAN, RBM8A, SARNP, SEH1L, SETD2, SMG1, SMG7, SRSF10, SRSF11, SRSF2, SRSF3, SRSF4, SRSF5, SRSF6, SRSF9, SUPT6H, THOC1, THOC2, U2AF2, UPF1, XPO1, XPOT]
GO:0009892	negative regulation of metabolic process	GO_BiologicalProcess-GOA_09.02.2016_16h18	4.1e-18	2.6e-15	1.7e-20	8.6e-19	[2, 3, 4]	Group22	24.9023	701	[AAAS, ACD, ACVR1B, ACVR2B, ADNP, AEBP2, AGO3, AKAP1, AKAP6, AKIRIN2, AKR1B1, AKT2, ANAPC1, ANAPC15, ANAPC5, ANOS1, ANP32E, ANTXR1, APBB1, APEX1, APLP2, APP, ARFGEF1, ARFGEF3, ARID1A, ARID4A, ARID5B, ARL2, ARPP19, ARRDC3, ASB1, ASCL1, ASXL1, ATAD2, ATCAY, ATF2, ATF3, ATF5, ATR, ATRAID, ATXN1L, ATXN2, AURKB, BACH2, BAHCC1, BAZ2A, BCL2, BCL6, BCL7A, BCLAF1, BEND3, BHLHE40, BHLHE41, BIRC5, BIRC6, BM…
GO:0010605	negative regulation of macromolecule metabolic process	GO_BiologicalProcess-GOA_09.02.2016_16h18	2.7e-20	1.8e-17	1.7e-20	8.6e-19	[3, 4, 5]	Group22	25.7654	648	[AAAS, ACD, ACVR1B, ACVR2B, ADNP, AEBP2, AGO3, AKAP1, AKIRIN2, AKR1B1, AKT2, ANAPC1, ANAPC15, ANAPC5, ANOS1, ANTXR1, APBB1, APEX1, APLP2, APP, ARFGEF3, ARID1A, ARID4A, ARID5B, ASB1, ASCL1, ASXL1, ATAD2, ATF2, ATF3, ATF5, ATR, ATRAID, ATXN1L, ATXN2, AURKB, BACH2, BAHCC1, BAZ2A, BCL6, BCL7A, BCLAF1, BEND3, BHLHE40, BHLHE41, BIRC5, BIRC6, BMP2, BMP7, BRCA1, BRCA2, BRD7, BRIP1, BTAF1, BTG2, BUB1, BUB…
GO:0031324	negative regulation of cellular metabolic process	GO_BiologicalProcess-GOA_09.02.2016_16h18	1.5e-16	1e-13	1.7e-20	8.6e-19	[3, 4, 5]	Group22	25.0401	625	[ACD, ACVR2B, AEBP2, AGO3, AKAP1, AKAP6, AKIRIN2, AKT2, ANAPC1, ANAPC15, ANAPC5, ANOS1, ANTXR1, APEX1, APLP2, APP, ARFGEF3, ARID1A, ARID4A, ARID5B, ASB1, ASCL1, ASXL1, ATAD2, ATCAY, ATF2, ATF3, ATF5, ATR, ATRAID, ATXN1L, ATXN2, AURKB, BACH2, BAHCC1, BAZ2A, BCL2, BCL6, BCL7A, BCLAF1, BEND3, BHLHE40, BHLHE41, BIRC5, BIRC6, BMP2, BMP7, BNIP3, BRCA1, BRCA2, BRD7, BRIP1, BTAF1, BTG2, BUB1, BUB1B, BUB3…
GO:0051246	regulation of protein metabolic process	GO_BiologicalProcess-GOA_09.02.2016_16h18	1.3e-12	7.9e-10	1.7e-20	8.6e-19	[4, 5]	Group22	23.8459	656	[AARS, ABI1, ABL2, ACVR1, ACVR1B, ACVR2B, ADCY3, ADCY6, ADCY9, ADNP, AGO3, AKAP1, AKAP6, AKIRIN2, AKR1B1, AKT2, AKTIP, ANAPC1, ANAPC15, ANAPC5, ANOS1, APBB1, APEX1, APLP2, APP, ARFGEF1, ARFGEF3, ARIH1, ARIH2, ARPP19, ARRDC3, ASB1, ATF3, ATG4B, ATP6AP1, ATRAID, ATXN2, AURKA, BBC3, BBS7, BCCIP, BCL2, BCL2L13, BCL6, BHLHE40, BIRC5, BIRC6, BMP2, BMP7, BNIP2, BOK, BRAF, BRAT1, BRCA1, BRD4, BRD7, BTG2,…
GO:0032268	regulation of cellular protein metabolic process	GO_BiologicalProcess-GOA_09.02.2016_16h18	4.6e-12	2.7e-09	1.7e-20	8.6e-19	[4, 5, 6]	Group22	23.936	613	[AARS, ABI1, ABL2, ACVR1, ACVR1B, ACVR2B, ADCY3, ADCY6, ADCY9, ADNP, AGO3, AKAP1, AKAP6, AKIRIN2, AKR1B1, AKT2, AKTIP, ANAPC1, ANAPC15, ANAPC5, ANOS1, APEX1, APLP2, APP, ARFGEF1, ARFGEF3, ARIH1, ARIH2, ARPP19, ARRDC3, ATF3, ATP6AP1, ATRAID, ATXN2, AURKA, BBC3, BBS7, BCCIP, BCL2, BCL2L13, BCL6, BHLHE40, BIRC5, BIRC6, BMP2, BMP7, BNIP2, BOK, BRAF, BRAT1, BRCA1, BRD4, BRD7, BTG2, BUB1, BUB1B, BUB3, …
GO:0051248	negative regulation of protein metabolic process	GO_BiologicalProcess-GOA_09.02.2016_16h18	2.2e-07	0.00011	1.7e-20	8.6e-19	[4, 5, 6]	Group22	24.8062	288	[AGO3, AKAP1, AKT2, ANAPC1, ANAPC15, ANAPC5, ANOS1, APBB1, APEX1, APLP2, APP, ARFGEF3, ASB1, ATF3, ATRAID, BIRC5, BIRC6, BMP7, BRCA1, BTG2, BUB1, BUB1B, BUB3, C5, CALR, CAMK2N1, CASC5, CAST, CCAR2, CCNB1, CD276, CD46, CDC16, CDC20, CDC23, CDKN1A, CDKN1B, CDKN2C, CELF1, CENPF, CEP192, CEP85, CHAC1, CHORDC1, CHP1, CIRBP, CNKSR3, CNOT1, CNOT3, CORO1C, CPAMD8, CRB2, CRIM1, CRIPAK, CRTAP, CRY1, CRY2, …
GO:0032269	negative regulation of cellular protein metabolic process	GO_BiologicalProcess-GOA_09.02.2016_16h18	3.7e-08	2e-05	1.7e-20	8.6e-19	[4, 5, 6, 7]	Group22	25.4362	277	[AGO3, AKAP1, AKT2, ANAPC1, ANAPC15, ANAPC5, ANOS1, APEX1, APLP2, APP, ARFGEF3, ATF3, ATRAID, BIRC5, BIRC6, BMP7, BRCA1, BTG2, BUB1, BUB1B, BUB3, C5, CALR, CAMK2N1, CASC5, CAST, CCAR2, CCNB1, CD46, CDC16, CDC20, CDC23, CDKN1A, CDKN1B, CDKN2C, CELF1, CENPF, CEP192, CEP85, CHAC1, CHORDC1, CHP1, CIRBP, CNKSR3, CNOT1, CNOT3, CORO1C, CPAMD8, CRB2, CRIM1, CRIPAK, CRTAP, CRY1, CRY2, CSNK2A1, CSRNP2, CST…
GO:0051606	detection of stimulus	GO_BiologicalProcess-GOA_09.02.2016_16h18	4.8e-17	3e-14	4.8e-17	2.2e-15	[2]	Group23	8.42767	67	[AGRN, ARID4A, CAMKMT, CCDC6, CCDC66, CNGB1, COL11A1, DENND5A, DENND5B, DTL, E2F1, EPHB1, GPC1, GPC2, GPC3, GPC4, GRIN2B, HLA-A, HMGA2, HSPG2, KIT, LPL, LRP1, LRP2, METAP2, MRPS11, MRPS28, NGFR, NR2F6, NTSR1, PARP1, PCNA, PDHX, PLEKHB1, POLD1, POLD3, POLDIP2, POLR1A, PTCH1, RAD18, RDH11, RFC2, RFC3, RFC4, RPA1, RPA2, RYR2, SDC1, SDC2, SDC3, SDC4, SEMA5A, SEMA5B, SERPINE2, SLC19A1, SMO, SMOX, SOX2…
GO:0051179	localization	GO_BiologicalProcess-GOA_09.02.2016_16h18	2.7e-05	0.012	3.1e-05	0.00018	[1]	Group24	20.6165	1224	[AAAS, AAK1, ABCA1, ABCC4, ABCC5, ABCD3, ABCD4, ABHD4, ABHD5, ABI1, ABL2, ACACA, ACBD3, ACD, ACSL3, ACTB, ACTG1, ACTR1A, ACVR1, ACVR1B, ACVR2B, ADAM10, ADAMTS12, ADAMTS9, ADCY3, ADCY6, ADCY9, ADD1, ADRBK1, AGFG1, AGRN, AHI1, AKAP1, AKAP10, AKAP12, AKAP6, AKR1B1, AKT2, AKTIP, ALDH5A1, ALKBH5, ANK3, ANLN, ANP32A, ANTXR1, ANTXR2, AP1G1, AP1S1, AP3B1, AP3D1, AP3M2, AP4M1, APBA2, APBB1, APCDD1, APEX1,…
GO:0033036	macromolecule localization	GO_BiologicalProcess-GOA_09.02.2016_16h18	8.8e-13	5.3e-10	3.1e-05	0.00018	[2]	Group24	23.6959	695	[AAAS, AAK1, ABCA1, ABCC4, ABCD3, ABHD4, ABHD5, ABL2, ACACA, ACD, ACSL3, ACVR2B, ADAMTS9, AGFG1, AGRN, AHI1, AKAP1, AKAP10, AKAP12, AKAP6, AKR1B1, AKT2, AKTIP, ALKBH5, ANK3, ANTXR1, AP1G1, AP1S1, AP3B1, AP3D1, AP3M2, AP4M1, APBA2, APBB1, APEX1, APOO, APPBP2, APPL1, AQP7, ARCN1, ARF1, ARFGAP1, ARFGAP3, ARFGEF1, ARFGEF2, ARHGAP33, ARIH2, ARL2, ARL3, ARMCX3, ARV1, ATCAY, ATG16L2, ATG4B, ATG4D, ATP11…
GO:0051641	cellular localization	GO_BiologicalProcess-GOA_09.02.2016_16h18	2.7e-12	1.6e-09	3.1e-05	0.00018	[2]	Group24	23.3448	744	[AAAS, ABCA1, ABCC4, ABL2, ACACA, ACD, ACSL3, ACVR2B, ADRBK1, AGFG1, AGRN, AHI1, AKAP1, AKAP12, AKAP6, AKR1B1, AKT2, AKTIP, ALDH5A1, ALKBH5, ANK3, ANP32A, ANTXR1, AP1G1, AP1S1, AP3B1, AP3D1, AP3M2, AP4M1, APBB1, APEX1, APP, APPBP2, APPL1, ARCN1, ARF1, ARFGAP1, ARFGAP3, ARFGEF1, ARFGEF2, ARHGAP21, ARIH2, ARL2, ARL3, ARMCX3, ARSB, ARV1, ASIC1, ASPM, ATCAY, ATF2, ATG4B, ATG4D, ATP1B3, ATP2A2, ATP2C1…
GO:0008104	protein localization	GO_BiologicalProcess-GOA_09.02.2016_16h18	1.4e-11	8.5e-09	3.1e-05	0.00018	[3]	Group24	23.8188	610	[AAAS, AAK1, ABCA1, ABL2, ACD, ACSL3, ACVR2B, ADAMTS9, AGRN, AHI1, AKAP1, AKAP10, AKAP12, AKAP6, AKR1B1, AKT2, AKTIP, ANK3, ANTXR1, AP1G1, AP1S1, AP3B1, AP3D1, AP3M2, AP4M1, APBA2, APBB1, APEX1, APPBP2, APPL1, ARCN1, ARF1, ARFGAP1, ARFGAP3, ARFGEF1, ARFGEF2, ARHGAP33, ARIH2, ARL2, ARL3, ARMCX3, ATCAY, ATG16L2, ATG4B, ATG4D, ATP1B3, ATP6AP1, ATP6V0B, ATP6V1B2, ATP6V1C1, ATP6V1E1, ATP6V1G1, ATP6V1H…
GO:0051649	establishment of localization in cell	GO_BiologicalProcess-GOA_09.02.2016_16h18	6.8e-10	3.9e-07	3.1e-05	0.00018	[3]	Group24	23.1743	641	[AAAS, ABCA1, ABCC4, ABL2, ACACA, ACD, ACSL3, ACVR2B, ADRBK1, AGFG1, AHI1, AKAP1, AKAP12, AKAP6, AKT2, AKTIP, ALDH5A1, ALKBH5, ANK3, ANP32A, AP1G1, AP1S1, AP3B1, AP3D1, AP3M2, AP4M1, APBB1, APEX1, APP, APPBP2, ARCN1, ARF1, ARFGAP1, ARFGAP3, ARFGEF1, ARFGEF2, ARHGAP21, ARIH2, ARL2, ARL3, ARSB, ARV1, ASIC1, ATF2, ATG4B, ATG4D, ATP2A2, ATP2C1, ATP5B, ATP5G1, ATP5G3, ATP5S, ATP6AP1, AUP1, B3GAT3, B4G…
GO:0061024	membrane organization	GO_BiologicalProcess-GOA_09.02.2016_16h18	1.3e-06	0.00064	3.1e-05	0.00018	[3]	Group24	24.384	287	[AAAS, ABCA1, ACSL3, ACTB, ACTG1, AGRN, AKR1B1, AKT2, ANK3, AP1G1, AP1S1, AP3D1, AP4M1, APOO, APP, APPL1, ARCN1, ARF1, ARFGAP1, ARFGAP3, ARV1, ATF2, ATG4B, ATG4D, ATP11B, ATP1B3, ATP2A2, ATP8B2, BAIAP2, BAIAP2L1, BANF1, BBC3, BCL2, BLOC1S1, BLOC1S2, BNIP3, BRAF, CCNB1, CCNB2, CDH2, CDK1, CDK5R1, CHMP3, CHMP6, CHORDC1, CHP1, CLASP2, CLCN3, CNIH1, CNP, CNTN2, COG1, COG3, COG8, COL5A1, COLQ, COPA, C…
GO:0070727	cellular macromolecule localization	GO_BiologicalProcess-GOA_09.02.2016_16h18	2.3e-14	1.4e-11	3.1e-05	0.00018	[3]	Group24	26.2154	426	[ABL2, ACD, ACSL3, AGRN, AHI1, AKAP1, AKAP12, AKAP6, AKR1B1, AKT2, ANK3, ANTXR1, AP1G1, AP1S1, AP3B1, AP3D1, AP3M2, AP4M1, APPBP2, APPL1, ARCN1, ARFGAP3, ARIH2, ARL2, ARL3, ARMCX3, ATG4B, ATG4D, ATP1B3, ATR, AUP1, AURKA, AURKB, B3GAT3, BAMBI, BBC3, BBS12, BCAP29, BCL2, BCL6, BMP7, BRAF, BRCA1, BRCA2, BUB1B, C2CD3, CALR, CASC5, CBLB, CCDC14, CCNB1, CCT5, CCT8, CD63, CDCA5, CDH2, CDK1, CDK5R1, CDKN…
GO:1902580	single-organism cellular localization	GO_BiologicalProcess-GOA_09.02.2016_16h18	4.2e-11	2.4e-08	3.1e-05	0.00018	[3]	Group24	25.8929	348	[ACSL3, AGRN, AKAP1, AKAP6, AKR1B1, AKT2, ANK3, AP3B1, AP3D1, AP3M2, APEX1, APPL1, ARCN1, ARF1, ARFGAP1, ARFGAP3, ARHGAP21, ARIH2, ASPM, ATCAY, ATG4B, ATG4D, ATP1B3, ATP2A2, BAMBI, BBC3, BBS7, BCL2, BCL6, BLOC1S1, BLOC1S2, BMP7, BRAF, BRCA1, BRCA2, CANX, CBLB, CCNB1, CDC23, CDCA5, CDCA8, CDH2, CDK1, CDK5R1, CDK5RAP2, CDKN1A, CENPE, CEP55, CEP57, CHMP3, CHMP6, CHORDC1, CHP1, CLASP2, CNIH1, COLQ, C…
GO:0044802	single-organism membrane organization	GO_BiologicalProcess-GOA_09.02.2016_16h18	3.7e-08	2e-05	3.1e-05	0.00018	[3, 4]	Group24	25.9143	248	[AAAS, ABCA1, ACSL3, AGRN, AKR1B1, AKT2, ANK3, AP3D1, APOO, APPL1, ARCN1, ARF1, ARFGAP1, ARFGAP3, ARV1, ATF2, ATG4B, ATG4D, ATP11B, ATP1B3, ATP2A2, ATP8B2, BAIAP2, BAIAP2L1, BANF1, BBC3, BCL2, BLOC1S2, BNIP3, BRAF, CCNB1, CCNB2, CDH2, CDK1, CDK5R1, CHMP3, CHORDC1, CHP1, CLASP2, CNIH1, CNP, CNTN2, COL5A1, COLQ, COPA, COPB2, COPE, COPG1, COPZ1, CPE, CTDSP2, CTSC, CUL3, DENND4C, DLG1, DLG3, DNAJA3, …
GO:0045184	establishment of protein localization	GO_BiologicalProcess-GOA_09.02.2016_16h18	1.2e-08	6.9e-06	3.1e-05	0.00018	[3, 4]	Group24	23.5518	496	[AAAS, ABCA1, ABL2, ACD, ACSL3, ACVR2B, ADAMTS9, AKAP1, AKAP12, AKAP6, AKR1B1, AKT2, AKTIP, ANK3, AP1G1, AP1S1, AP3B1, AP3D1, AP3M2, AP4M1, APBA2, APBB1, APEX1, APPBP2, APPL1, ARCN1, ARF1, ARFGAP1, ARFGAP3, ARFGEF1, ARFGEF2, ARHGAP33, ARIH2, ARL2, ARL3, ATG16L2, ATG4B, ATG4D, ATP6AP1, ATP6V0B, ATP6V1B2, ATP6V1C1, ATP6V1E1, ATP6V1G1, ATP6V1H, AUP1, B3GAT3, BAMBI, BBC3, BBIP1, BBS12, BBS7, BCAP29, …
GO:0046907	intracellular transport	GO_BiologicalProcess-GOA_09.02.2016_16h18	1.3e-12	8.2e-10	3.1e-05	0.00018	[4]	Group24	24.8996	496	[AAAS, ABCA1, ACACA, ACD, ACSL3, AGFG1, AKAP1, AKAP12, AKAP6, AKT2, AKTIP, ALKBH5, ANK3, ANP32A, AP1G1, AP1S1, AP3B1, AP3D1, AP3M2, AP4M1, APEX1, APP, APPBP2, ARCN1, ARF1, ARFGAP1, ARFGAP3, ARFGEF2, ARHGAP21, ARIH2, ARL3, ARSB, ARV1, ATF2, ATG4B, ATG4D, ATP2A2, ATP2C1, ATP5B, ATP5G1, ATP5G3, ATP5S, AUP1, B3GAT3, BAMBI, BBC3, BBS12, BBS7, BCAP29, BCL2, BCL6, BLOC1S1, BLOC1S2, BMP7, BNIP3, BRAF, BR…
GO:0071702	organic substance transport	GO_BiologicalProcess-GOA_09.02.2016_16h18	4.5e-05	0.019	3.1e-05	0.00018	[4]	Group24	21.717	597	[AAAS, ABCA1, ABCC4, ABCC5, ABCD3, ABL2, ACACA, ACD, ACSL3, ACVR2B, ADAMTS9, ADRBK1, AGFG1, AKAP1, AKAP12, AKAP6, AKT2, AKTIP, ALKBH5, ANK3, AP1G1, AP1S1, AP3B1, AP3D1, AP3M2, AP4M1, APBA2, APBB1, APEX1, APOO, APPBP2, APPL1, AQP7, ARCN1, ARF1, ARFGAP1, ARFGAP3, ARFGEF1, ARFGEF2, ARHGAP33, ARIH2, ARL2, ARL3, ARPP19, ARV1, ATG16L2, ATG4B, ATG4D, ATP11B, ATP6AP1, ATP6V0B, ATP6V1B2, ATP6V1C1, ATP6V1E…
GO:0015031	protein transport	GO_BiologicalProcess-GOA_09.02.2016_16h18	1e-06	0.00049	3.1e-05	0.00018	[4, 5]	Group24	23.0415	450	[AAAS, ABCA1, ABL2, ACD, ACSL3, ACVR2B, ADAMTS9, AKAP1, AKAP12, AKAP6, AKT2, AKTIP, ANK3, AP1G1, AP1S1, AP3B1, AP3D1, AP3M2, AP4M1, APBA2, APBB1, APEX1, APPBP2, ARCN1, ARF1, ARFGAP1, ARFGAP3, ARFGEF1, ARFGEF2, ARHGAP33, ARIH2, ARL2, ARL3, ATG16L2, ATG4B, ATG4D, ATP6AP1, ATP6V0B, ATP6V1B2, ATP6V1C1, ATP6V1E1, ATP6V1G1, ATP6V1H, AUP1, B3GAT3, BAMBI, BBIP1, BBS12, BBS7, BCAP29, BCL6, BIRC5, BMP7, BR…
GO:1902582	single-organism intracellular transport	GO_BiologicalProcess-GOA_09.02.2016_16h18	6.8e-13	4.1e-10	3.1e-05	0.00018	[4, 5]	Group24	25.3158	461	[ABCA1, ACACA, ACSL3, AGFG1, AKAP1, AKAP12, AKAP6, AKT2, AKTIP, ALKBH5, ANK3, AP1G1, AP1S1, AP3B1, AP3D1, AP3M2, AP4M1, APEX1, APP, ARCN1, ARF1, ARFGAP1, ARFGAP3, ARFGEF2, ARHGAP21, ARIH2, ARL3, ARSB, ARV1, ATF2, ATG4B, ATG4D, ATP2A2, ATP2C1, ATP5B, ATP5G1, ATP5G3, ATP5S, AUP1, BAMBI, BBC3, BBS12, BCAP29, BCL2, BCL6, BLOC1S1, BLOC1S2, BMP7, BNIP3, BRAF, BRCA1, CACNA1C, CALR, CAMK2D, CANX, CBLB, C…
GO:0072594	establishment of protein localization to organelle	GO_BiologicalProcess-GOA_09.02.2016_16h18	3.5e-07	0.00018	3.1e-05	0.00018	[4, 5, 6]	Group24	26.6003	187	[ACD, AKAP1, AKAP6, AP3B1, ARIH2, BAMBI, BBC3, BCL2, BCL6, BMP7, BRCA1, BRCA2, CBLB, CCT5, CCT8, CDK1, CDKN1A, CEP57, CHORDC1, CHP1, CRY2, DACT1, DAG1, DKC1, DMAP1, DPH6, DYNLL1, DYRK2, E2F1, F2R, FAM20B, FBXW7, FGF9, FLNA, FZD5, FZD7, GAS6, GCC1, GLI3, GRPEL2, GSK3B, H2AFY, H2AFY2, HSPA4, HSPA8, HSPA9, HSPH1, HTT, HYAL2, IPO13, IPO8, IPO9, JAK2, JUN, KAT2A, KPNA2, KPNA4, KPNA6, KPNB1, LAMP1, LEP…
GO:0051640	organelle localization	GO_BiologicalProcess-GOA_09.02.2016_16h18	6.6e-08	3.5e-05	1.2e-10	4.8e-09	[3]	Group25	28.7449	142	[AHI1, AP3B1, AP3D1, AP3M2, APEX1, ARCN1, ARF1, ARFGAP1, ARFGAP3, ARHGAP21, ASPM, ATCAY, ATP2A2, ATP6AP1, AURKA, BBS7, BIRC5, BLOC1S1, BLOC1S2, BRAF, BRAT1, BRCA2, CANX, CCNB1, CDC23, CDCA5, CDCA8, CDH2, CDK5RAP2, CENPE, CENPF, CEP55, CHMP3, CHMP6, CLASP2, CNIH1, COPA, COPB2, COPE, COPG1, COPZ1, CPLX2, CTSC, CUL3, DENND1A, DLG1, DLGAP5, DMD, DNM1, DNM2, DYNLT1, ESPL1, EZR, FEZ1, GBF1, GOLGA2, GOS…
GO:0051656	establishment of organelle localization	GO_BiologicalProcess-GOA_09.02.2016_16h18	2.6e-08	1.4e-05	1.2e-10	4.8e-09	[3, 4]	Group25	30.8108	114	[AHI1, AP3B1, AP3D1, AP3M2, APEX1, ARCN1, ARF1, ARFGAP1, ARFGAP3, ARHGAP21, ATP2A2, ATP6AP1, BBS7, BIRC5, BLOC1S1, BLOC1S2, BRAF, BRCA2, CANX, CCNB1, CDC23, CDCA5, CDCA8, CDK5RAP2, CENPE, CENPF, CEP55, CHMP3, CHMP6, CLASP2, CNIH1, COPA, COPB2, COPE, COPG1, COPZ1, CPLX2, CTSC, CUL3, DENND1A, DLG1, DLGAP5, DNM1, DNM2, DYNLT1, ESPL1, EZR, FEZ1, GBF1, GOLGA2, GOSR2, GRN, HTT, ITSN1, KIF1B, KIF22, KIF…
GO:0016050	vesicle organization	GO_BiologicalProcess-GOA_09.02.2016_16h18	4.4e-07	0.00022	1.2e-10	4.8e-09	[4]	Group25	31.1419	90	[ABCA1, AGFG1, AKT2, AP1G1, AP3B1, AP3D1, ARCN1, ARF1, ARFGAP1, ARFGAP3, BCL2, BLOC1S1, BLOC1S2, CASC5, CHMP3, CHMP6, CLCN3, CNIH1, COPA, COPB2, COPE, COPG1, COPZ1, CTSC, CUL3, EPS15, F2R, GBF1, GOLGA2, GOLPH3, GOSR2, HIP1, INSIG1, LLGL1, NBEAL2, NSF, PAFAH1B1, PIK3C2A, PPP6R1, PPP6R3, PREB, PRKCI, RAB1B, RAB3A, RAB7A, RAB8A, SAR1A, SAR1B, SDC1, SDC4, SEC23A, SEC24A, SEC24C, SEC24D, SEC31A, SERPI…
GO:0051650	establishment of vesicle localization	GO_BiologicalProcess-GOA_09.02.2016_16h18	0.00011	0.046	1.2e-10	4.8e-09	[4, 5]	Group25	29.1139	69	[AHI1, AP3B1, AP3D1, AP3M2, APEX1, ARCN1, ARF1, ARFGAP1, ARFGAP3, ATP2A2, BBS7, BLOC1S1, BLOC1S2, BRAF, CANX, CLASP2, CNIH1, COPA, COPB2, COPE, COPG1, COPZ1, CPLX2, CTSC, CUL3, DENND1A, DNM1, DNM2, GBF1, GOLGA2, GOSR2, GRN, HTT, ITSN1, NDE1, NDEL1, NSF, PAFAH1B1, PCLO, PFN2, PPP6R1, PPP6R3, PREB, RAB11A, RAB1B, RAB3A, RAB3GAP1, RAB5A, RAP1A, SAR1B, SEC23A, SEC24A, SEC24C, SEC24D, SEC31A, SHROOM2,…
GO:0002252	immune effector process	GO_BiologicalProcess-GOA_09.02.2016_16h18	4.8e-05	0.02	1.1e-05	0.00012	[2]	Group26	13.7413	119	[ABI1, ACTB, ACTG1, ALKBH5, AP1G1, AP1S1, ARF1, ARPC4, ATP6V1H, BAIAP2, BCL2, BCL6, BCR, BNIP3, BRK1, C5, CD37, CD46, CD47, CEBPB, CEBPG, CHAF1B, CPLX2, CRK, CTSC, CXADR, CYFIP1, DDIT4, DLG1, DLL1, DNAJC3, DUSP22, EMP2, EOMES, ERCC1, EXOSC3, FADD, FANCL, FAS, FOXJ1, FXR2, FZD5, GBF1, GMIP, GPRC5B, HILPDA, HLA-A, HMGB1, HNRNPC, HTRA1, HYAL2, IFIT2, IGF2, IL20RB, ILF3, ITPKC, KIAA1549L, KIT, LAMP1,…
GO:0009607	response to biotic stimulus	GO_BiologicalProcess-GOA_09.02.2016_16h18	7.7e-05	0.032	1.1e-05	0.00012	[2]	Group26	14.2996	147	[ABCA1, ACTA2, ADH5, AKIRIN2, ALKBH5, AP1G1, AP1S1, APP, ARF1, ATP6V1H, BAIAP2, BAIAP2L1, BANF1, BCL2, BCR, BNIP3, BTBD17, CCT5, CD37, CD47, CEBPB, CHAF1B, CLN5, CNP, COTL1, CPAMD8, CREBZF, CXADR, CXCL12, DCLK1, DDIT3, DDIT4, DDX56, DHX36, DNAJC3, DROSHA, EIF2AK3, ENO1, F2R, FADD, FANCL, FAS, FOS, FUCA2, FXR2, FZD5, GMIP, GSK3B, GTF2F1, HDAC2, HDAC5, HILPDA, HIST2H2BE, HLA-A, HMGA1, HMGA2, HMGB1,…
GO:0051707	response to other organism	GO_BiologicalProcess-GOA_09.02.2016_16h18	7.3e-06	0.0034	1.1e-05	0.00012	[2, 4]	Group26	13.6364	135	[ABCA1, ACTA2, ADH5, AKIRIN2, ALKBH5, AP1G1, AP1S1, APP, ARF1, ATP6V1H, BAIAP2, BAIAP2L1, BANF1, BCL2, BCR, BNIP3, BTBD17, CCT5, CD37, CD47, CEBPB, CHAF1B, CLN5, CNP, COTL1, CPAMD8, CREBZF, CXADR, CXCL12, DCLK1, DDIT4, DDX56, DHX36, DNAJC3, DROSHA, ENO1, F2R, FADD, FANCL, FAS, FOS, FUCA2, FXR2, FZD5, GMIP, GTF2F1, HDAC2, HDAC5, HILPDA, HIST2H2BE, HLA-A, HMGA1, HMGA2, HMGB2, HNRNPA0, HNRNPM, HNRNP…
GO:0009617	response to bacterium	GO_BiologicalProcess-GOA_09.02.2016_16h18	4e-07	0.0002	1.1e-05	0.00012	[3, 5]	Group26	11.3333	68	[ABCA1, ADH5, AKIRIN2, APP, BAIAP2, BAIAP2L1, BCR, CD47, CEBPB, CLN5, CNP, CPAMD8, DROSHA, F2R, FAS, FOS, FUCA2, FZD5, HDAC2, HDAC5, HIST2H2BE, HLA-A, HMGB2, HNRNPA0, HNRNPM, JAK2, JUN, LGALS9, LOXL1, MAPK8, MAPK9, MAPKAPK2, MGST1, MYDGF, NFE2L1, NFKB2, NFKBIA, NGFR, NOCT, NR1D1, OGT, OPTN, PELI1, PLCG2, PPARGC1A, PPM1D, PRKCSH, PXDN, RIPK2, RNASEH2A, SASH1, SEH1L, SOCS3, SPARC, STAT5B, TFAP2A, T…
GO:0098542	defense response to other organism	GO_BiologicalProcess-GOA_09.02.2016_16h18	1.9e-08	1e-05	1.1e-05	0.00012	[3, 4, 5]	Group26	10.5351	63	[ALKBH5, AP1G1, AP1S1, APP, ARF1, ATP6V1H, BCL2, BNIP3, CD37, CEBPB, CHAF1B, COTL1, CPAMD8, CXADR, DDIT4, DNAJC3, DROSHA, FADD, FANCL, FXR2, GMIP, HILPDA, HIST2H2BE, HLA-A, HMGB2, HTRA1, HYAL2, IFIT2, ILF3, ITPKC, KIAA1549L, LSM14A, LSM4, MBD5, MYDGF, NCBP3, OPTN, PMAIP1, POLR3D, POLR3E, PRKCSH, PXDN, RFWD3, RIPK2, SEH1L, SLC37A4, SMURF1, SNRPB, SNRPD1, SNRPD2, SUPT3H, TARBP2, TKFC, TMEM39A, TMF1…
GO:0050793	regulation of developmental process	GO_BiologicalProcess-GOA_09.02.2016_16h18	2.3e-06	0.0011	4.1e-07	1e-05	[2, 3]	Group27	22.5249	521	[ABCA1, ABL2, ACVR1, ACVR1B, ACVR2B, ADAMTS12, ADAMTS7, ADCY6, ADGRV1, ADM2, ADNP, AGRN, AHI1, AKAP6, AKR1B1, AP3B1, AP3D1, APBB1, APEX1, APP, ARF1, ARHGEF1, ARID4A, ARPIN, ARSB, ASCL1, ASPM, ASXL1, ATF5, ATP6AP1, ATRAID, ATRN, ATXN1L, ATXN2, AURKA, B4GALT1, BAIAP2, BAMBI, BBS12, BCL2, BCL6, BCL9L, BCR, BHLHE41, BMP2, BMP7, BNIP2, BNIP3, BRAF, BRCA1, BRCA2, BRINP2, BUD31, C21orf2, C5, CA2, CACNA1…
GO:0048869	cellular developmental process	GO_BiologicalProcess-GOA_09.02.2016_16h18	5.4e-08	2.9e-05	4.1e-07	1e-05	[3]	Group27	21.722	936	[ABCA1, ABCC4, ABHD5, ABI1, ABL2, ACD, ACTA2, ACTB, ACTC1, ACTG1, ACVR1, ACVR1B, ACVR2B, ADAM10, ADAM12, ADAMTS12, ADAMTS7, ADCY6, ADD1, ADGRV1, ADNP, AFF4, AGFG1, AGRN, AHI1, AK7, AKAP6, AKR1B1, AKT2, ALKBH5, ALPK3, ANK3, ANLN, ANOS1, ANTXR1, AP1G1, AP3B1, AP3D1, APBB1, APCDD1, APEX1, APP, ARF1, ARFGEF1, ARHGAP39, ARHGEF1, ARHGEF11, ARID1A, ARID4A, ARID5B, ARIH2, ARL3, ARPC4, ARPIN, ARSB, ASCL1,…
GO:2000026	regulation of multicellular organismal development	GO_BiologicalProcess-GOA_09.02.2016_16h18	2.9e-05	0.013	4.1e-07	1e-05	[3, 4]	Group27	22.7299	388	[ABL2, ACVR1, ACVR1B, ACVR2B, ADAMTS12, ADAMTS7, ADCY6, ADM2, ADNP, AGRN, AHI1, AKAP6, AKR1B1, AP3B1, AP3D1, APBB1, APEX1, APP, ARF1, ARHGEF1, ARID4A, ARSB, ASCL1, ASPM, ATF5, ATP6AP1, ATRAID, ATXN1L, B4GALT1, BAIAP2, BAMBI, BCL2, BCL6, BCL9L, BMP2, BMP7, BNIP2, BRAF, BRCA1, BRCA2, BRINP2, BUD31, C5, CA2, CALR, CAMK1D, CBLB, CCNB1, CCND1, CD276, CD46, CDC20, CDH2, CDH4, CDK1, CDK5R1, CDK5RAP2, CD…
GO:0030154	cell differentiation	GO_BiologicalProcess-GOA_09.02.2016_16h18	8.8e-07	0.00043	4.1e-07	1e-05	[4]	Group27	21.5706	868	[ABCA1, ABHD5, ABI1, ABL2, ACD, ACTA2, ACTB, ACTC1, ACTG1, ACVR1, ACVR1B, ACVR2B, ADAM10, ADAM12, ADAMTS12, ADAMTS7, ADCY6, ADD1, ADGRV1, ADNP, AFF4, AGFG1, AGRN, AHI1, AKAP6, AKR1B1, AKT2, ALKBH5, ALPK3, ANK3, ANLN, ANOS1, ANTXR1, AP1G1, AP3B1, AP3D1, APBB1, APCDD1, APEX1, APP, ARF1, ARFGEF1, ARHGAP39, ARHGEF1, ARHGEF11, ARID1A, ARID4A, ARID5B, ARIH2, ARL3, ARPC4, ARSB, ASCL1, ASF1B, ASPM, ASTN1…
GO:0045595	regulation of cell differentiation	GO_BiologicalProcess-GOA_09.02.2016_16h18	5.3e-07	0.00027	4.1e-07	1e-05	[3, 4, 5]	Group27	23.6694	378	[ABCA1, ABL2, ACVR1, ACVR1B, ACVR2B, ADAMTS12, ADAMTS7, ADCY6, ADGRV1, ADNP, AHI1, AKAP6, AKR1B1, AP3B1, AP3D1, APBB1, APEX1, APP, ARF1, ARHGEF1, ARID4A, ARSB, ASCL1, ASPM, ASXL1, ATF5, ATP6AP1, ATRAID, AURKA, B4GALT1, BAIAP2, BAMBI, BBS12, BCL2, BCL6, BCL9L, BHLHE41, BMP2, BMP7, BNIP2, BRAF, BRINP2, BUD31, CA2, CALR, CAMK1D, CCND1, CD276, CD46, CDC20, CDH2, CDH4, CDK1, CDK5R1, CDK5RAP2, CEBPB, C…
GO:0048468	cell development	GO_BiologicalProcess-GOA_09.02.2016_16h18	1.4e-07	7.7e-05	4.1e-07	1e-05	[3, 4, 5]	Group27	22.8972	539	[ABI1, ABL2, ACTA2, ACTB, ACTC1, ACTG1, ACVR1, ADAM10, ADCY6, ADNP, AFF4, AGFG1, AGRN, AHI1, AKAP6, AKR1B1, AKT2, ALPK3, ANK3, ANOS1, ANTXR1, APBB1, APEX1, APP, ARF1, ARFGEF1, ARHGAP39, ARHGEF1, ARHGEF11, ARID4A, ARID5B, ARIH2, ARL3, ARPC4, ARSB, ASCL1, ASPM, ATCAY, ATF5, ATP2A2, ATP6AP1, ATXN2, AURKA, B4GALT1, BAIAP2, BAMBI, BCL2, BCL6, BCL9L, BLOC1S1, BLOC1S2, BMP2, BMP7, BNIP2, BRAF, BRCA2, BR…
GO:0022604	regulation of cell morphogenesis	GO_BiologicalProcess-GOA_09.02.2016_16h18	3.7e-05	0.016	4.1e-07	1e-05	[4, 5, 6]	Group27	25.7785	149	[ADNP, APEX1, ARHGEF1, ARPIN, BAIAP2, BAMBI, BCL9L, BMP2, BRAF, BUD31, C21orf2, CALR, CAMSAP1, CDC42EP1, CDC42EP2, CDC42SE1, CDH2, CDH4, CDK5R1, CHRNA3, CIT, CLASP2, CNTN2, COL1A1, CORO1C, CRB2, CTTN, CXCL12, CYFIP1, DAG1, DAPK3, DIAPH1, DLG1, DNM2, DRAXIN, DYNLL1, EEF2K, EPHA4, EPHA7, EVI5L, EZR, FLNA, FMNL3, GAS7, GCNT2, GSK3B, HDAC2, HNRNPK, HTT, IFRD1, ITGB1BP1, KCTD17, KIT, L1CAM, LARP4, LDL…
GO:0051960	regulation of nervous system development	GO_BiologicalProcess-GOA_09.02.2016_16h18	4.9e-07	0.00024	4.1e-07	1e-05	[4, 5, 6]	Group27	25.894	210	[ABL2, ADCY6, ADNP, AGRN, APBB1, APEX1, APP, ARF1, ARHGEF1, ARSB, ASCL1, ASPM, ATF5, BAIAP2, BCL2, BCL6, BMP2, BMP7, BNIP2, BRAF, BRINP2, BUD31, CALR, CAMK1D, CDC20, CDH2, CDH4, CDK1, CDK5R1, CDK5RAP2, CELSR1, CHRNA3, CIT, CLASP2, CLSTN2, CNTN2, COLQ, CPNE1, CRTC1, CTTN, CXCL12, CYB5D2, DGUOK, DLG1, DLL1, DLL3, DLL4, DMD, DMRTA2, DNM2, DPYSL3, DRAXIN, DYNLT1, EEF2K, EIF2AK3, EOMES, EPHA4, EPHA7, …
GO:0051961	negative regulation of nervous system development	GO_BiologicalProcess-GOA_09.02.2016_16h18	3.1e-07	0.00016	4.1e-07	1e-05	[3, 4, 5, 6, 7]	Group27	31.2715	91	[ADCY6, APP, ARHGEF1, ASCL1, ASPM, ATF5, BMP7, BUD31, CALR, CDK5R1, CDK5RAP2, CIT, CNTN2, DGUOK, DLL1, DLL3, DPYSL3, DRAXIN, DYNLT1, EIF2AK3, EPHA4, EPHA7, FAT3, FGFR3, FIG4, FKBP4, GAK, GDF11, GLI3, GPR161, GPR173, GSK3B, HDAC2, HMGA2, HNRNPK, HOOK3, ID2, IFRD1, ITGB1, LINGO1, LRP1, LRP4, MBD1, MECP2, MED1, MTMR2, NF1, NFATC4, NGFR, NOG, NR2E1, NTN1, PAFAH1B1, PAX6, PCM1, PLK2, PPP3CA, PRKCSH, P…
GO:0060284	regulation of cell development	GO_BiologicalProcess-GOA_09.02.2016_16h18	4.7e-07	0.00024	4.1e-07	1e-05	[4, 5, 6]	Group27	25.5249	231	[ABL2, ADCY6, ADNP, AKAP6, APBB1, APEX1, APP, ARF1, ARHGEF1, ARSB, ASCL1, ASPM, ATF5, ATP6AP1, AURKA, B4GALT1, BAIAP2, BAMBI, BCL2, BCL6, BCL9L, BMP2, BMP7, BNIP2, BRAF, BRINP2, BUD31, CALR, CAMK1D, CDC20, CDH2, CDH4, CDK1, CDK5R1, CDK5RAP2, CHRNA3, CIT, CLASP2, CNOT1, CNOT3, CNTN2, COL1A1, CORO1C, CPNE1, CRB2, CRTC1, CTTN, CXCL12, CYB5D2, DAG1, DDX39B, DGUOK, DLL1, DLL3, DLL4, DMD, DMRTA2, DNM2,…
GO:0010721	negative regulation of cell development	GO_BiologicalProcess-GOA_09.02.2016_16h18	1.3e-05	0.006	4.1e-07	1e-05	[4, 5, 6, 7]	Group27	28.7009	95	[ADCY6, APP, ARHGEF1, ASCL1, ASPM, ATF5, BCL2, BMP7, BUD31, CALR, CDK5R1, CDK5RAP2, CIT, CNTN2, CORO1C, DGUOK, DLL1, DLL3, DPYSL3, DRAXIN, DYNLT1, EPHA4, EPHA7, FAM101B, FAT3, FGFR3, FKBP4, GAK, GDF11, GLI3, GPR173, GSK3B, HDAC2, HMGA2, HOOK3, ID2, IFRD1, ITGB1, ITGB1BP1, LDLRAD4, LINGO1, LRP1, LRP4, MBD1, MECP2, MED1, MELTF, NF1, NFATC4, NGFR, NOG, NR2E1, NTN1, PAFAH1B1, PAX6, PCM1, PLK2, PPP3CA…
GO:0050768	negative regulation of neurogenesis	GO_BiologicalProcess-GOA_09.02.2016_16h18	1.3e-06	0.00065	4.1e-07	1e-05	[4, 5, 6, 7, 8, 9]	Group27	31.1111	84	[ADCY6, APP, ARHGEF1, ASCL1, ASPM, ATF5, BMP7, BUD31, CALR, CDK5R1, CDK5RAP2, CIT, CNTN2, DGUOK, DLL1, DLL3, DPYSL3, DRAXIN, DYNLT1, EPHA4, EPHA7, FAT3, FGFR3, FKBP4, GAK, GDF11, GLI3, GPR173, GSK3B, HDAC2, HMGA2, HOOK3, ID2, IFRD1, ITGB1, LINGO1, LRP1, LRP4, MBD1, MECP2, MED1, NF1, NFATC4, NGFR, NOG, NR2E1, NTN1, PAFAH1B1, PAX6, PCM1, PLK2, PPP3CA, PRKCSH, PTN, PTPRO, PTPRZ1, PXMP2, RAPGEF2, RES…
GO:0031175	neuron projection development	GO_BiologicalProcess-GOA_09.02.2016_16h18	3.3e-09	1.8e-06	4.1e-07	1e-05	[4, 5, 6, 7, 9, 10]	Group27	25.5639	306	[ABL2, ACTB, ACTG1, ADAM10, ADCY6, ADNP, AGRN, ANK3, ANOS1, APBB1, APP, ARF1, ARFGEF1, ARHGAP39, ARHGEF1, ARHGEF11, ARPC4, ARSB, ATCAY, ATXN2, AURKA, BAIAP2, BCL2, BLOC1S1, BLOC1S2, BMP7, BRAF, BTG2, BUD31, C6orf89, CACNA1C, CAMK1D, CAMK2D, CAMSAP1, CDC20, CDH11, CDH2, CDH4, CDK16, CDK5R1, CELSR2, CELSR3, CHRNA3, CIT, CLASP2, CNP, CNTN2, CNTNAP1, COL2A1, COL4A1, COL4A2, COL5A1, COL9A1, CPNE1, CRT…
GO:0008219	cell death	GO_BiologicalProcess-GOA_09.02.2016_16h18	4.1e-07	0.00021	4.1e-07	1e-05	[3]	Group28	22.9869	491	[AARS, ABL2, ACTC1, ACVR1, ACVR1B, ADD1, ADNP, AEN, AGRN, AHI1, AKR1B1, AKT2, AKTIP, APBB1, APP, APPL1, ARHGAP21, ARHGEF11, ARHGEF6, ARNT2, ASCL1, ASNS, ATAD5, ATCAY, ATF2, ATF3, ATF5, ATG4D, AURKA, AURKB, B4GALT1, BAG3, BBC3, BCAP29, BCL2, BCL2L13, BCL2L2, BCL6, BCLAF1, BEX1, BIRC5, BIRC6, BLCAP, BLOC1S2, BMP2, BMP7, BNIP2, BNIP3, BOK, BRAF, BRAT1, BRCA1, BRCA2, BTG2, BUB1, BUB1B, BUD31, C19orf6…
GO:0012501	programmed cell death	GO_BiologicalProcess-GOA_09.02.2016_16h18	4.6e-07	0.00023	4.1e-07	1e-05	[4]	Group28	23.1151	466	[AARS, ABL2, ACTC1, ACVR1, ACVR1B, ADD1, ADNP, AEN, AGRN, AHI1, AKR1B1, AKT2, AKTIP, APBB1, APP, APPL1, ARHGAP21, ARHGEF11, ARHGEF6, ARNT2, ASCL1, ASNS, ATAD5, ATCAY, ATF2, ATF3, ATF5, ATG4D, AURKA, AURKB, B4GALT1, BAG3, BBC3, BCAP29, BCL2, BCL2L13, BCL2L2, BCL6, BCLAF1, BEX1, BIRC5, BIRC6, BLCAP, BLOC1S2, BMP2, BMP7, BNIP2, BNIP3, BOK, BRAF, BRAT1, BRCA1, BRCA2, BTG2, BUB1, BUB1B, BUD31, C19orf6…
GO:0060548	negative regulation of cell death	GO_BiologicalProcess-GOA_09.02.2016_16h18	0.0001	0.042	4.1e-07	1e-05	[3, 4, 5]	Group28	23.6275	241	[AARS, ABL2, ACTC1, ACVR1, ADNP, AHI1, AKR1B1, AKT2, ARHGAP21, ARNT2, ASCL1, ASNS, ATAD5, ATF5, AURKA, AURKB, BAG3, BCL2, BCL2L2, BCL6, BIRC5, BIRC6, BMP7, BNIP2, BNIP3, BRAF, BRCA1, BTG2, CAMK1D, CAST, CBX4, CCAR2, CDK1, CDKN1A, CDKN1B, CEBPB, CITED2, CLN5, COL2A1, CPAMD8, CREB3L1, CSNK2A1, CST3, CTGF, CTH, CTSB, CTTN, CXCL12, CYR61, DDX11, DLL1, DNAJA3, DNAJB6, DNAJC3, DRAXIN, DUSP1, EEF2K, EGR…
GO:0043067	regulation of programmed cell death	GO_BiologicalProcess-GOA_09.02.2016_16h18	0.0001	0.041	4.1e-07	1e-05	[4, 5]	Group28	22.6032	356	[AARS, ABL2, ACTC1, ACVR1, ADNP, AGRN, AHI1, AKR1B1, AKT2, APBB1, ARHGAP21, ARHGEF11, ARHGEF6, ARNT2, ASCL1, ASNS, ATAD5, ATF2, ATF3, ATF5, AURKA, AURKB, B4GALT1, BAG3, BBC3, BCL2, BCL2L13, BCL2L2, BCL6, BCLAF1, BEX1, BIRC5, BIRC6, BMP2, BMP7, BNIP2, BNIP3, BOK, BRAF, BRCA1, BTG2, BUB1, BUD31, CALR, CAMK1D, CAMK2D, CAST, CBX4, CCAR2, CD248, CDK1, CDK5R1, CDKN1A, CDKN1B, CEBPB, CITED2, CLN5, COL18…
GO:0043069	negative regulation of programmed cell death	GO_BiologicalProcess-GOA_09.02.2016_16h18	9.6e-05	0.04	4.1e-07	1e-05	[4, 5, 6]	Group28	23.8347	225	[AARS, ABL2, ACTC1, ACVR1, ADNP, AHI1, AKR1B1, AKT2, ARHGAP21, ARNT2, ASCL1, ASNS, ATAD5, ATF5, AURKA, AURKB, BAG3, BCL2, BCL2L2, BCL6, BIRC5, BIRC6, BMP7, BNIP2, BNIP3, BRAF, BRCA1, BTG2, CAMK1D, CAST, CBX4, CCAR2, CDK1, CDKN1A, CDKN1B, CEBPB, CITED2, CLN5, COL2A1, CPAMD8, CREB3L1, CSNK2A1, CTH, CTTN, CXCL12, CYR61, DDX11, DLL1, DNAJA3, DNAJB6, DNAJC3, DRAXIN, DUSP1, EEF2K, EGR3, EIF2AK3, F2R, F…
GO:0010256	endomembrane system organization	GO_BiologicalProcess-GOA_09.02.2016_16h18	6.4e-06	0.003	3.6e-10	1.3e-08	[3]	Group29	26.5125	149	[AAAS, ABCA1, ACSL3, AGFG1, AGRN, AKR1B1, AKT2, AKTIP, ANK3, AP3D1, APPL1, ARFGEF1, ARFGEF2, ARHGAP21, ARV1, ATP1B3, ATP2A2, ATP8B2, BAIAP2, BAIAP2L1, BANF1, BLOC1S1, BLOC1S2, CASC5, CCNB1, CCNB2, CDH2, CDK1, CHMP3, CHMP6, CLASP2, CLCN3, COG1, COG3, COL5A1, CSNK1A1, CTDSP2, DENND4C, DLG1, DNM1, DNM2, EIF2AK3, EMP2, EPHA2, EXOC8, EZR, F2R, FAM160A2, FAT4, FLOT1, GAK, GAS6, GBF1, GOLGA2, GOLGA5, GO…
GO:0061024	membrane organization	GO_BiologicalProcess-GOA_09.02.2016_16h18	1.3e-06	0.00064	3.6e-10	1.3e-08	[3]	Group29	24.384	287	[AAAS, ABCA1, ACSL3, ACTB, ACTG1, AGRN, AKR1B1, AKT2, ANK3, AP1G1, AP1S1, AP3D1, AP4M1, APOO, APP, APPL1, ARCN1, ARF1, ARFGAP1, ARFGAP3, ARV1, ATF2, ATG4B, ATG4D, ATP11B, ATP1B3, ATP2A2, ATP8B2, BAIAP2, BAIAP2L1, BANF1, BBC3, BCL2, BLOC1S1, BLOC1S2, BNIP3, BRAF, CCNB1, CCNB2, CDH2, CDK1, CDK5R1, CHMP3, CHMP6, CHORDC1, CHP1, CLASP2, CLCN3, CNIH1, CNP, CNTN2, COG1, COG3, COG8, COL5A1, COLQ, COPA, C…
GO:1902580	single-organism cellular localization	GO_BiologicalProcess-GOA_09.02.2016_16h18	4.2e-11	2.4e-08	3.6e-10	1.3e-08	[3]	Group29	25.8929	348	[ACSL3, AGRN, AKAP1, AKAP6, AKR1B1, AKT2, ANK3, AP3B1, AP3D1, AP3M2, APEX1, APPL1, ARCN1, ARF1, ARFGAP1, ARFGAP3, ARHGAP21, ARIH2, ASPM, ATCAY, ATG4B, ATG4D, ATP1B3, ATP2A2, BAMBI, BBC3, BBS7, BCL2, BCL6, BLOC1S1, BLOC1S2, BMP7, BRAF, BRCA1, BRCA2, CANX, CBLB, CCNB1, CDC23, CDCA5, CDCA8, CDH2, CDK1, CDK5R1, CDK5RAP2, CDKN1A, CENPE, CEP55, CEP57, CHMP3, CHMP6, CHORDC1, CHP1, CLASP2, CNIH1, COLQ, C…
GO:0044802	single-organism membrane organization	GO_BiologicalProcess-GOA_09.02.2016_16h18	3.7e-08	2e-05	3.6e-10	1.3e-08	[3, 4]	Group29	25.9143	248	[AAAS, ABCA1, ACSL3, AGRN, AKR1B1, AKT2, ANK3, AP3D1, APOO, APPL1, ARCN1, ARF1, ARFGAP1, ARFGAP3, ARV1, ATF2, ATG4B, ATG4D, ATP11B, ATP1B3, ATP2A2, ATP8B2, BAIAP2, BAIAP2L1, BANF1, BBC3, BCL2, BLOC1S2, BNIP3, BRAF, CCNB1, CCNB2, CDH2, CDK1, CDK5R1, CHMP3, CHORDC1, CHP1, CLASP2, CNIH1, CNP, CNTN2, COL5A1, COLQ, COPA, COPB2, COPE, COPG1, COPZ1, CPE, CTDSP2, CTSC, CUL3, DENND4C, DLG1, DLG3, DNAJA3, …
GO:0006950	response to stress	GO_BiologicalProcess-GOA_09.02.2016_16h18	5.4e-06	0.0025	3e-08	9.8e-07	[2]	Group3	21.2711	907	[AAAS, AARS, ABCA1, ABCC4, ABHD12, ABI1, ABL2, ACD, ACTB, ACTG1, ACVR1, ADAMTS12, ADAMTS18, ADAMTS7, ADCY3, ADCY6, ADCY9, ADD1, ADH5, ADRBK1, AEN, AGO3, AHCY, AK7, AKAP1, AKAP10, AKIRIN2, AKR1B1, AKT2, ALKBH1, ALKBH5, AMFR, ANTXR1, AP1G1, AP1S1, AP3B1, APBB1, APEX1, APP, AQP7, AQR, ARF1, ARFGAP1, ARFGAP3, ARFGEF1, ARHGEF6, ARNT2, ARPC4, ASCC3, ASNS, ATAD5, ATF2, ATF3, ATF6B, ATP1B3, ATP2A2, ATP6V…
GO:0033554	cellular response to stress	GO_BiologicalProcess-GOA_09.02.2016_16h18	1.3e-28	9.4e-26	3e-08	9.8e-07	[3]	Group3	28.326	577	[AAAS, AARS, ACD, ADAMTS7, ADD1, AEN, AKR1B1, ALKBH1, AMFR, ANTXR1, APBB1, APEX1, AQR, ARFGAP1, ARFGAP3, ARHGEF6, ASCC3, ASNS, ATAD5, ATF2, ATF3, ATF6B, ATP2A2, ATR, ATRIP, AUP1, BAG3, BBC3, BCCIP, BCL2, BCL2L2, BCL6, BCLAF1, BHLHE40, BLOC1S1, BMP2, BMP7, BNIP3, BOD1L1, BOK, BRAF, BRAT1, BRCA1, BRCA2, BRD4, BRIP1, BTG2, C5, CA2, CALR, CAMK2D, CCAR2, CCDC88C, CCNB1, CCND1, CDC45, CDC5L, CDC7, CDCA…
GO:0006974	cellular response to DNA damage stimulus	GO_BiologicalProcess-GOA_09.02.2016_16h18	1.6e-18	1e-15	3e-08	9.8e-07	[4]	Group3	31.2876	260	[ACD, AEN, ALKBH1, ANTXR1, APBB1, APEX1, AQR, ASCC3, ATAD5, ATF2, ATR, ATRIP, BBC3, BCCIP, BCL2, BCL2L2, BCL6, BCLAF1, BHLHE40, BOD1L1, BOK, BRAT1, BRCA1, BRCA2, BRD4, BRIP1, BTG2, CCAR2, CCND1, CDC45, CDC5L, CDC7, CDCA5, CDK1, CDK2, CDKN1A, CDKN1B, CDKN2AIP, CEBPG, CEP63, CHAF1A, CHAF1B, CHD2, CLSPN, CRY1, CRY2, CSNK1E, CXCL12, DDB2, DDIT3, DDIT4, DDX39B, DEK, DEPDC1B, DGKZ, DMAP1, DNA2, DTL, DY…
GO:0006259	DNA metabolic process	GO_BiologicalProcess-GOA_09.02.2016_16h18	6.4e-18	4.1e-15	3e-08	9.8e-07	[4, 5, 6]	Group3	29.7915	300	[ACD, ALKBH1, ANTXR1, APBB1, APEX1, AQR, ASCC3, ATR, ATRIP, AURKB, BANF1, BAZ2A, BCCIP, BCL6, BEND3, BHLHE40, BOD1L1, BRCA1, BRCA2, BRIP1, BTG2, CALR, CCT5, CCT8, CDC45, CDC5L, CDC6, CDC7, CDCA5, CDK1, CDK2, CDKN1A, CDT1, CEBPG, CECR2, CENPF, CHAF1A, CHAF1B, CHRAC1, CHTF8, CLSPN, CNGB1, COL26A1, CRY2, CSNK1E, CST3, CTCF, CTGF, DBF4B, DDB2, DDX39B, DEK, DEPDC1B, DHX36, DKC1, DMAP1, DNA2, DNAJA3, D…
GO:0006281	DNA repair	GO_BiologicalProcess-GOA_09.02.2016_16h18	7.1e-16	4.4e-13	3e-08	9.8e-07	[3, 5, 6, 7]	Group3	33.3962	177	[ALKBH1, ANTXR1, APBB1, APEX1, AQR, ASCC3, ATR, ATRIP, BCCIP, BHLHE40, BOD1L1, BRCA1, BRCA2, BRIP1, BTG2, CDC45, CDC5L, CDC7, CDCA5, CDK1, CDK2, CEBPG, CHAF1A, CHAF1B, CLSPN, CRY2, CSNK1E, DDB2, DEK, DEPDC1B, DMAP1, DNA2, DTL, EME2, ENDOV, EP300, ERCC1, ERCC2, ERCC6L2, EYA2, FANCA, FANCD2, FANCI, FANCL, FEN1, FIGN, FOXM1, GADD45A, GEN1, GINS2, GINS4, GTF2H2, GTF2H5, H2AFX, HMGA1, HMGA2, HMGB1, HM…
GO:0051052	regulation of DNA metabolic process	GO_BiologicalProcess-GOA_09.02.2016_16h18	2.7e-08	1.5e-05	3e-08	9.8e-07	[4, 5, 6, 7]	Group3	30.9392	112	[ACD, ANTXR1, APBB1, APEX1, ATR, AURKB, BCL6, BRCA1, BRCA2, CALR, CCT5, CCT8, CDC6, CDC7, CDK1, CDK2, CDKN1A, CDT1, CEBPG, COL26A1, CST3, DBF4B, DDX39B, DEK, DEPDC1B, DHX36, DKC1, DNA2, DNAJC2, DNMT3A, DSCC1, DUSP1, E2F7, ERCC1, ESCO1, EXOSC3, FBXW7, FIGN, FOXM1, GJA1, GMNN, GNL3, GSK3B, H2AFX, HDAC8, HMGA2, HMGB1, HNRNPC, HNRNPU, HUS1, INPP5K, JUN, KCNK2, KLF4, KPNA2, LRIF1, MAPK15, MAPKAPK5, MB…
GO:0000725	recombinational repair	GO_BiologicalProcess-GOA_09.02.2016_16h18	2.5e-08	1.4e-05	3e-08	9.8e-07	[4, 6, 7, 8]	Group3	37.8205	59	[ANTXR1, ATR, ATRIP, BRCA1, BRCA2, BRIP1, CDC45, CDC7, CDK2, CLSPN, DEPDC1B, DNA2, ERCC1, FEN1, FIGN, GEN1, GINS2, GINS4, H2AFX, HUS1, MCM8, MCM9, MDC1, MMS22L, MRE11A, MUS81, PARP1, PARPBP, PIAS4, POLR1A, PPP4C, PPP4R2, RAD50, RAD51AP1, RAD51D, RAD52, RAD54L, RFC2, RFC3, RFC4, RMI2, RNF138, RPA1, RPA2, SFPQ, SHFM1, TERF2IP, TIMELESS, TONSL, TP53BP1, UBA52, UBB, UBC, UBE2I, UBE2N, UIMC1, WHSC1, X…
GO:0006302	double-strand break repair	GO_BiologicalProcess-GOA_09.02.2016_16h18	1.4e-10	8.5e-08	3e-08	9.8e-07	[4, 6, 7, 8]	Group3	36.7965	85	[ANTXR1, APBB1, ATR, ATRIP, BRCA1, BRCA2, BRIP1, CDC45, CDC7, CDCA5, CDK2, CLSPN, DEK, DEPDC1B, DNA2, ERCC1, EYA2, FEN1, FIGN, FOXM1, GEN1, GINS2, GINS4, H2AFX, HMGA2, HUS1, KDM4A, KIAA0430, KPNA2, LIG1, LRIF1, LRIG1, MAPK8, MCM8, MCM9, MDC1, MMS22L, MRE11A, MSH2, MUS81, OGG1, OTUB1, PARP1, PARPBP, PIAS4, POLR1A, PPP4C, PPP4R2, PPP5C, PRKDC, RAD50, RAD51AP1, RAD51D, RAD52, RAD54L, RFC2, RFC3, RFC…
GO:0065009	regulation of molecular function	GO_BiologicalProcess-GOA_09.02.2016_16h18	2e-09	1.1e-06	4.1e-25	2.1e-23	[2]	Group30	22.8648	680	[ABHD5, ABI1, ABL2, ACD, ACVR2B, ADCY3, ADCY6, ADCY9, ADD1, ADNP, ADRBK1, AGAP6, AGFG1, AGRN, AHSA2, AKAP6, AKIRIN2, AKR1B1, AKT2, AKTIP, ALDH1A1, AMFR, ANAPC1, ANAPC15, ANAPC5, ANK3, ANOS1, ANP32E, ANTXR1, APEX1, APLP2, APP, ARF1, ARFGAP1, ARFGAP3, ARFGEF1, ARFGEF2, ARFGEF3, ARHGAP11A, ARHGAP17, ARHGAP21, ARHGAP23, ARHGAP33, ARHGAP5, ARHGEF1, ARHGEF11, ARHGEF39, ARHGEF6, ARID5B, ARL2, ARPP19, AR…
GO:0009893	positive regulation of metabolic process	GO_BiologicalProcess-GOA_09.02.2016_16h18	4.9e-17	3.1e-14	4.1e-25	2.1e-23	[2, 3, 4]	Group30	23.7023	895	[ABCA1, ABHD5, ABI1, ABL2, ACACA, ACD, ACSL3, ACTA2, ACTB, ACTC1, ACVR1, ACVR1B, ACVR2B, ADCY3, ADCY6, ADCY9, ADM2, ADNP, ADRBK1, AGAP6, AGFG1, AGRN, AHI1, AHSA2, AKAP12, AKAP6, AKIRIN2, AKR1B1, AKT2, AKTIP, ALDH1A1, ANAPC1, ANAPC15, ANAPC5, ANK3, ANTXR1, APBB1, APEX1, APP, ARF1, ARFGAP1, ARFGAP3, ARFGEF1, ARFGEF2, ARFGEF3, ARHGAP11A, ARHGAP17, ARHGAP21, ARHGAP23, ARHGAP33, ARHGAP5, ARHGEF1, ARHG…
GO:0044093	positive regulation of molecular function	GO_BiologicalProcess-GOA_09.02.2016_16h18	5.3e-08	2.8e-05	4.1e-25	2.1e-23	[3]	Group30	23.6002	451	[ABHD5, ABI1, ABL2, ACD, ACVR2B, ADCY3, ADCY6, ADCY9, ADD1, ADNP, ADRBK1, AGAP6, AGFG1, AGRN, AHSA2, AKAP6, AKIRIN2, AKR1B1, AKT2, AKTIP, ALDH1A1, AMFR, ANAPC1, ANAPC15, ANAPC5, ANK3, APEX1, APP, ARF1, ARFGAP1, ARFGAP3, ARFGEF1, ARFGEF2, ARFGEF3, ARHGAP11A, ARHGAP17, ARHGAP21, ARHGAP23, ARHGAP33, ARHGAP5, ARHGEF1, ARHGEF11, ARHGEF39, ARHGEF6, ARID5B, ARRDC3, ATF2, ATP1B3, ATRAID, AURKB, B3GAT3, B…
GO:0019538	protein metabolic process	GO_BiologicalProcess-GOA_09.02.2016_16h18	1.3e-20	8.7e-18	4.1e-25	2.1e-23	[3, 4]	Group30	22.755	1343	[AAAS, AAK1, AARS, ABCA1, ABHD5, ABI1, ABL2, ACACA, ACD, ACP1, ACTB, ACVR1, ACVR1B, ACVR2B, ADAM10, ADAM11, ADAM12, ADAM19, ADAMTS12, ADAMTS15, ADAMTS18, ADAMTS3, ADAMTS7, ADAMTS9, ADCY3, ADCY6, ADCY9, ADD1, ADH5, ADM2, ADNP, ADRBK1, AGO3, AGRN, AKAP1, AKAP6, AKIRIN2, AKR1B1, AKT2, AKT3, AKTIP, ALG2, ALG6, ALPK3, AMFR, ANAPC1, ANAPC15, ANAPC5, ANK3, ANOS1, ANTXR1, APBB1, APEX1, APLP2, APP, ARCN1,…
GO:0050790	regulation of catalytic activity	GO_BiologicalProcess-GOA_09.02.2016_16h18	1.7e-06	0.00083	4.1e-25	2.1e-23	[3, 4]	Group30	22.4242	555	[ABHD5, ABI1, ABL2, ACD, ACVR2B, ADCY3, ADCY6, ADCY9, ADNP, ADRBK1, AGAP6, AGFG1, AGRN, AHSA2, AKAP6, AKIRIN2, AKR1B1, AKT2, ALDH1A1, ANAPC1, ANAPC15, ANAPC5, ANOS1, ANP32E, APLP2, APP, ARF1, ARFGAP1, ARFGAP3, ARFGEF1, ARFGEF2, ARFGEF3, ARHGAP11A, ARHGAP17, ARHGAP21, ARHGAP23, ARHGAP33, ARHGAP5, ARHGEF1, ARHGEF11, ARHGEF39, ARHGEF6, ARL2, ARPP19, ARRDC3, ATP1B3, ATP6V1H, ATRAID, AUP1, AURKB, B3GA…
GO:0060255	regulation of macromolecule metabolic process	GO_BiologicalProcess-GOA_09.02.2016_16h18	3e-24	2e-21	4.1e-25	2.1e-23	[3, 4]	Group30	23.0577	1383	[AAAS, AARS, ABI1, ABL2, ACAD8, ACD, ACTA2, ACTB, ACTC1, ACVR1, ACVR1B, ACVR2B, ADCY3, ADCY6, ADCY9, ADM2, ADNP, AEBP2, AFF3, AFF4, AGO3, AGRN, AHI1, AKAP1, AKAP17A, AKAP6, AKIRIN2, AKR1B1, AKT2, AKTIP, ALPK3, ANAPC1, ANAPC15, ANAPC5, ANK3, ANKRA2, ANOS1, ANP32A, ANTXR1, APBA2, APBB1, APEX1, APLP2, APP, ARF1, ARFGEF1, ARFGEF3, ARGLU1, ARHGEF11, ARID1A, ARID3B, ARID4A, ARID5B, ARIH1, ARIH2, ARMCX3…
GO:0080090	regulation of primary metabolic process	GO_BiologicalProcess-GOA_09.02.2016_16h18	6.4e-22	4.2e-19	4.1e-25	2.1e-23	[3, 4]	Group30	22.8395	1369	[AARS, ABCA1, ABHD5, ABI1, ABL2, ACAD8, ACD, ACSL3, ACVR1, ACVR1B, ACVR2B, ADCY3, ADCY6, ADCY9, ADIPOR1, ADNP, AEBP2, AFF3, AFF4, AGO3, AGRN, AHI1, AKAP1, AKAP12, AKAP17A, AKAP6, AKIRIN2, AKR1B1, AKT2, AKTIP, ALPK3, ANAPC1, ANAPC15, ANAPC5, ANKRA2, ANOS1, ANP32A, ANTXR1, APBB1, APEX1, APLP2, APP, ARF1, ARFGEF1, ARFGEF3, ARGLU1, ARHGEF11, ARID1A, ARID3B, ARID4A, ARID5B, ARIH1, ARIH2, ARMCX3, ARNT2…
GO:0010604	positive regulation of macromolecule metabolic process	GO_BiologicalProcess-GOA_09.02.2016_16h18	1e-15	6.4e-13	4.1e-25	2.1e-23	[3, 4, 5]	Group30	24.1697	735	[ABI1, ABL2, ACD, ACTA2, ACTB, ACTC1, ACVR1, ACVR1B, ACVR2B, ADCY3, ADCY6, ADCY9, ADM2, ADNP, AGRN, AHI1, AKAP6, AKIRIN2, AKR1B1, AKT2, AKTIP, ANAPC1, ANAPC15, ANAPC5, ANK3, ANTXR1, APBB1, APEX1, APP, ARFGEF1, ARHGEF11, ARID1A, ARID3B, ARID4A, ARID5B, ARIH1, ARIH2, ARMCX3, ARNT2, ARRDC3, ASCL1, ASXL1, ATAD1, ATAD2, ATF2, ATF3, ATF5, ATF6B, ATG4B, ATP6AP1, ATR, ATRAID, AURKA, AURKB, BAMBI, BBC3, B…
GO:0031325	positive regulation of cellular metabolic process	GO_BiologicalProcess-GOA_09.02.2016_16h18	2.7e-12	1.6e-09	4.1e-25	2.1e-23	[3, 4, 5]	Group30	23.4472	721	[ABCA1, ABHD5, ABI1, ABL2, ACACA, ACD, ACSL3, ACVR1, ACVR1B, ACVR2B, ADCY3, ADCY6, ADCY9, ADNP, AGRN, AHI1, AKAP12, AKAP6, AKIRIN2, AKR1B1, AKT2, AKTIP, ANAPC1, ANAPC15, ANAPC5, ANTXR1, APBB1, APEX1, APP, ARFGEF1, ARHGEF11, ARID1A, ARID3B, ARID4A, ARID5B, ARIH1, ARIH2, ARMCX3, ARNT2, ARPP19, ARRDC3, ASCL1, ASXL1, ATAD1, ATAD2, ATF2, ATF3, ATF5, ATF6B, ATP6AP1, ATR, ATRAID, AURKA, AURKB, BAMBI, BB…
GO:0043085	positive regulation of catalytic activity	GO_BiologicalProcess-GOA_09.02.2016_16h18	3e-05	0.013	4.1e-25	2.1e-23	[3, 4, 5]	Group30	22.8167	371	[ABHD5, ABI1, ABL2, ACD, ACVR2B, ADCY3, ADCY6, ADCY9, ADNP, ADRBK1, AGAP6, AGFG1, AGRN, AHSA2, AKAP6, AKIRIN2, AKT2, ALDH1A1, ANAPC1, ANAPC15, ANAPC5, APP, ARF1, ARFGAP1, ARFGAP3, ARFGEF1, ARFGEF2, ARFGEF3, ARHGAP11A, ARHGAP17, ARHGAP21, ARHGAP23, ARHGAP33, ARHGAP5, ARHGEF1, ARHGEF11, ARHGEF39, ARHGEF6, ARRDC3, ATP1B3, ATRAID, AURKB, B3GAT3, BBC3, BCL2, BCL2L13, BCR, BMP2, BNIP2, BOK, BRAF, BRD8,…
GO:0044267	cellular protein metabolic process	GO_BiologicalProcess-GOA_09.02.2016_16h18	9.6e-28	6.5e-25	4.1e-25	2.1e-23	[4, 5]	Group30	23.8658	1252	[AAAS, AAK1, AARS, ABCA1, ABI1, ABL2, ACD, ACP1, ACTB, ACVR1, ACVR1B, ACVR2B, ADAM10, ADAMTS12, ADAMTS7, ADCY3, ADCY6, ADCY9, ADD1, ADH5, ADM2, ADNP, ADRBK1, AGO3, AKAP1, AKAP6, AKIRIN2, AKR1B1, AKT2, AKT3, AKTIP, ALG2, ALG6, ALPK3, AMFR, ANAPC1, ANAPC15, ANAPC5, ANK3, ANOS1, ANTXR1, APBB1, APEX1, APLP2, APP, ARCN1, ARFGAP1, ARFGAP3, ARFGEF1, ARFGEF3, ARHGEF6, ARID4A, ARIH1, ARIH2, ARPP19, ARRDC3…
GO:0051246	regulation of protein metabolic process	GO_BiologicalProcess-GOA_09.02.2016_16h18	1.3e-12	7.9e-10	4.1e-25	2.1e-23	[4, 5]	Group30	23.8459	656	[AARS, ABI1, ABL2, ACVR1, ACVR1B, ACVR2B, ADCY3, ADCY6, ADCY9, ADNP, AGO3, AKAP1, AKAP6, AKIRIN2, AKR1B1, AKT2, AKTIP, ANAPC1, ANAPC15, ANAPC5, ANOS1, APBB1, APEX1, APLP2, APP, ARFGEF1, ARFGEF3, ARIH1, ARIH2, ARPP19, ARRDC3, ASB1, ATF3, ATG4B, ATP6AP1, ATRAID, ATXN2, AURKA, BBC3, BBS7, BCCIP, BCL2, BCL2L13, BCL6, BHLHE40, BIRC5, BIRC6, BMP2, BMP7, BNIP2, BOK, BRAF, BRAT1, BRCA1, BRD4, BRD7, BTG2,…
GO:0051336	regulation of hydrolase activity	GO_BiologicalProcess-GOA_09.02.2016_16h18	5.2e-06	0.0025	4.1e-25	2.1e-23	[4, 5]	Group30	23.6744	317	[ABHD5, ABL2, ADCY3, ADCY6, ADCY9, ADRBK1, AGAP6, AGFG1, AGRN, AHSA2, AKAP6, AKIRIN2, AKT2, ALDH1A1, ANOS1, APLP2, APP, ARFGAP1, ARFGAP3, ARFGEF1, ARFGEF2, ARFGEF3, ARHGAP11A, ARHGAP17, ARHGAP21, ARHGAP23, ARHGAP33, ARHGAP5, ARHGEF1, ARHGEF11, ARHGEF39, ARHGEF6, ARL2, ARPP19, ATP1B3, BBC3, BCL2L13, BCL6, BCR, BIRC5, BIRC6, BMP2, BNIP2, BOK, BRD8, C5, C6orf89, CAMK2D, CASC5, CAST, CCPG1, CDC42EP1,…
GO:0051338	regulation of transferase activity	GO_BiologicalProcess-GOA_09.02.2016_16h18	6.5e-05	0.027	4.1e-25	2.1e-23	[4, 5]	Group30	23.5669	259	[ABI1, ACD, ACVR2B, ADCY3, ADCY6, ADCY9, ADNP, ANAPC1, ANAPC15, ANAPC5, APLP2, APP, ARRDC3, ATRAID, AURKB, BCCIP, BMP2, BMP7, BRAF, BUB1, BUB1B, BUB3, BUD31, C5, C6orf89, CAMK2D, CAMK2N1, CCNB1, CCND1, CCND2, CCNL1, CCNL2, CCNT1, CCNT2, CCNY, CDC16, CDC20, CDC23, CDC6, CDK1, CDK2, CDK5R1, CDK5R2, CDKN1A, CDKN1B, CDKN2C, CENPE, CENPF, CEP85, CHORDC1, CHP1, CHRNA3, CHRNA7, CKS1B, CKS2, CLSPN, CORO1…
GO:0032268	regulation of cellular protein metabolic process	GO_BiologicalProcess-GOA_09.02.2016_16h18	4.6e-12	2.7e-09	4.1e-25	2.1e-23	[4, 5, 6]	Group30	23.936	613	[AARS, ABI1, ABL2, ACVR1, ACVR1B, ACVR2B, ADCY3, ADCY6, ADCY9, ADNP, AGO3, AKAP1, AKAP6, AKIRIN2, AKR1B1, AKT2, AKTIP, ANAPC1, ANAPC15, ANAPC5, ANOS1, APEX1, APLP2, APP, ARFGEF1, ARFGEF3, ARIH1, ARIH2, ARPP19, ARRDC3, ATF3, ATP6AP1, ATRAID, ATXN2, AURKA, BBC3, BBS7, BCCIP, BCL2, BCL2L13, BCL6, BHLHE40, BIRC5, BIRC6, BMP2, BMP7, BNIP2, BOK, BRAF, BRAT1, BRCA1, BRD4, BRD7, BTG2, BUB1, BUB1B, BUB3, …
GO:0051247	positive regulation of protein metabolic process	GO_BiologicalProcess-GOA_09.02.2016_16h18	3.7e-05	0.016	4.1e-25	2.1e-23	[4, 5, 6]	Group30	22.7218	379	[ABI1, ABL2, ACVR1, ACVR1B, ACVR2B, ADCY3, ADCY6, ADCY9, ADNP, AKAP6, AKIRIN2, AKR1B1, AKT2, AKTIP, ANAPC1, ANAPC15, ANAPC5, APP, ARFGEF1, ARIH1, ARIH2, ARRDC3, ATG4B, ATP6AP1, ATRAID, AURKA, BBC3, BBS7, BCL2, BCL2L13, BCL6, BHLHE40, BMP2, BMP7, BNIP2, BOK, BRAF, BRAT1, BRCA1, BRD7, BUD31, C5, C6orf89, CAMK2D, CBLB, CCNB1, CCND1, CCND2, CCNL1, CCNL2, CCNT1, CCNT2, CCNY, CD276, CDC16, CDC20, CDC23…
GO:0051248	negative regulation of protein metabolic process	GO_BiologicalProcess-GOA_09.02.2016_16h18	2.2e-07	0.00011	4.1e-25	2.1e-23	[4, 5, 6]	Group30	24.8062	288	[AGO3, AKAP1, AKT2, ANAPC1, ANAPC15, ANAPC5, ANOS1, APBB1, APEX1, APLP2, APP, ARFGEF3, ASB1, ATF3, ATRAID, BIRC5, BIRC6, BMP7, BRCA1, BTG2, BUB1, BUB1B, BUB3, C5, CALR, CAMK2N1, CASC5, CAST, CCAR2, CCNB1, CD276, CD46, CDC16, CDC20, CDC23, CDKN1A, CDKN1B, CDKN2C, CELF1, CENPF, CEP192, CEP85, CHAC1, CHORDC1, CHP1, CIRBP, CNKSR3, CNOT1, CNOT3, CORO1C, CPAMD8, CRB2, CRIM1, CRIPAK, CRTAP, CRY1, CRY2, …
GO:0032269	negative regulation of cellular protein metabolic process	GO_BiologicalProcess-GOA_09.02.2016_16h18	3.7e-08	2e-05	4.1e-25	2.1e-23	[4, 5, 6, 7]	Group30	25.4362	277	[AGO3, AKAP1, AKT2, ANAPC1, ANAPC15, ANAPC5, ANOS1, APEX1, APLP2, APP, ARFGEF3, ATF3, ATRAID, BIRC5, BIRC6, BMP7, BRCA1, BTG2, BUB1, BUB1B, BUB3, C5, CALR, CAMK2N1, CASC5, CAST, CCAR2, CCNB1, CD46, CDC16, CDC20, CDC23, CDKN1A, CDKN1B, CDKN2C, CELF1, CENPF, CEP192, CEP85, CHAC1, CHORDC1, CHP1, CIRBP, CNKSR3, CNOT1, CNOT3, CORO1C, CPAMD8, CRB2, CRIM1, CRIPAK, CRTAP, CRY1, CRY2, CSNK2A1, CSRNP2, CST…
GO:0032270	positive regulation of cellular protein metabolic process	GO_BiologicalProcess-GOA_09.02.2016_16h18	0.0001	0.044	4.1e-25	2.1e-23	[4, 5, 6, 7]	Group30	22.6282	353	[ABI1, ABL2, ACVR1, ACVR1B, ACVR2B, ADCY3, ADCY6, ADCY9, ADNP, AKAP6, AKIRIN2, AKR1B1, AKT2, AKTIP, ANAPC1, ANAPC15, ANAPC5, APP, ARFGEF1, ARIH1, ARIH2, ARRDC3, ATP6AP1, ATRAID, AURKA, BBC3, BBS7, BCL2, BCL2L13, BCL6, BHLHE40, BMP2, BMP7, BNIP2, BOK, BRAF, BRAT1, BRCA1, BRD7, BUD31, C5, C6orf89, CAMK2D, CCNB1, CCND1, CCND2, CCNL1, CCNL2, CCNT1, CCNT2, CCNY, CDC16, CDC20, CDC23, CDC6, CDH2, CDK1, …
GO:0070925	organelle assembly	GO_BiologicalProcess-GOA_09.02.2016_16h18	1.8e-05	0.0083	1.8e-05	0.00018	[4]	Group31	25.625	164	[ABCC4, ACTC1, ACTG1, AGFG1, AHI1, AK7, ANLN, APEX1, ASPM, ATG16L2, ATG2A, ATG2B, ATG4B, ATG4D, ATXN2, AURKA, AURKB, B9D1, BBIP1, BBS10, BBS7, BHLHE40, BIRC5, BRCA1, C2CD3, CASC5, CCDC40, CDK2, CDK5RAP2, CELSR2, CELSR3, CENPC, CENPE, CENPF, CENPH, CEP135, CEP152, CEP192, CEP63, CEP89, CFAP46, CFL2, CHMP3, CHMP6, CIRBP, CNOT1, DMD, EVI5L, EZR, FAM161A, FAM175B, FEZ1, FHOD3, FLNA, FMNL3, FOXJ1, GAB…
GO:0009719	response to endogenous stimulus	GO_BiologicalProcess-GOA_09.02.2016_16h18	5.2e-06	0.0025	6.9e-08	2e-06	[2]	Group32	22.9008	420	[AARS, ABCA1, ACACA, ACVR1, ACVR2B, ADAMTS12, ADAMTS7, ADCY3, ADCY6, ADCY9, ADIPOR1, ADRBK1, AGO3, AK2, AKAP1, AKAP6, AKR1B1, AKT2, APEX1, APP, APPL1, AQP7, ARNT2, ARSB, ASCL1, ASNS, ATP2A2, ATP6AP1, ATP6V0B, ATP6V1B2, ATP6V1C1, ATP6V1E1, ATP6V1G1, ATP6V1H, AURKA, BAIAP2, BAIAP2L1, BAMBI, BCL2, BCL9L, BMP2, BMP7, BRAF, BRCA1, BRCA2, BTG2, C12orf76, C6orf89, CA2, CAD, CALR, CAMK2D, CAPN2, CAPN5, C…
GO:0010033	response to organic substance	GO_BiologicalProcess-GOA_09.02.2016_16h18	4.2e-08	2.3e-05	6.9e-08	2e-06	[3]	Group32	22.3985	706	[AAAS, AARS, ABCA1, ABCD3, ABL2, ACACA, ACD, ACSL3, ACTC1, ACVR1, ACVR2B, ADAM10, ADAMTS12, ADAMTS3, ADAMTS7, ADCY3, ADCY6, ADCY9, ADD1, ADH5, ADIPOR1, ADNP, ADRBK1, AFF3, AGO3, AK2, AKAP1, AKAP6, AKIRIN2, AKR1B1, AKT2, AMFR, APEX1, APP, APPL1, AQP7, ARFGAP1, ARFGAP3, ARHGEF1, ARHGEF11, ARHGEF6, ARID4A, ARIH1, ARNT2, ARSB, ASCL1, ASNS, ASXL1, ATF3, ATF6B, ATP2A2, ATP5G3, ATP6AP1, ATP6V0B, ATP6V1B…
GO:0071495	cellular response to endogenous stimulus	GO_BiologicalProcess-GOA_09.02.2016_16h18	3.2e-06	0.0015	6.9e-08	2e-06	[3]	Group32	23.74	325	[ACACA, ACVR1, ACVR2B, ADAMTS12, ADAMTS7, ADCY3, ADCY6, ADCY9, ADIPOR1, ADRBK1, AGO3, AKAP1, AKAP6, AKR1B1, AKT2, APEX1, APP, APPL1, AQP7, ASNS, ATP6AP1, ATP6V0B, ATP6V1B2, ATP6V1C1, ATP6V1E1, ATP6V1G1, ATP6V1H, BAIAP2, BAIAP2L1, BAMBI, BCL9L, BMP2, BMP7, BRAF, BRCA1, C6orf89, CAD, CAMK2D, CAPN2, CAPN5, CCNT1, CCNT2, CDC5L, CDC6, CDK2, CDKN1A, CDKN1B, CEBPB, CEP57, CHRDL1, CITED2, COL1A1, COL2A1,…
GO:1901698	response to nitrogen compound	GO_BiologicalProcess-GOA_09.02.2016_16h18	6.1e-05	0.026	6.9e-08	2e-06	[3]	Group32	23.5035	267	[AARS, ADCY3, ADCY6, ADCY9, ADIPOR1, AGO3, AKAP1, AKAP6, AKR1B1, AKT2, APEX1, APP, APPL1, AQP7, ASCL1, ASNS, ATP2A2, ATP6AP1, ATP6V0B, ATP6V1B2, ATP6V1C1, ATP6V1E1, ATP6V1G1, ATP6V1H, BAIAP2, BAIAP2L1, BCL2, BMP7, BRAF, BRCA1, BTG2, C12orf76, C6orf89, CAD, CAMK2D, CAPN2, CCND1, CDC5L, CDC6, CDK1, CDK2, CDKN1A, CDKN1B, CEBPB, CHRNA1, CHRNA3, CHRNA5, CHRNA7, CHRNB4, COL1A1, COL4A1, COL4A6, CRY1, CR…
GO:0009725	response to hormone	GO_BiologicalProcess-GOA_09.02.2016_16h18	7.3e-05	0.031	6.9e-08	2e-06	[3, 4]	Group32	23.4416	267	[ACACA, ACVR1, ADCY3, ADCY6, ADCY9, ADIPOR1, AK2, AKAP1, AKR1B1, AKT2, APEX1, APPL1, ARNT2, ARSB, ASNS, ATP2A2, ATP6AP1, ATP6V0B, ATP6V1B2, ATP6V1C1, ATP6V1E1, ATP6V1G1, ATP6V1H, AURKA, BAIAP2, BAIAP2L1, BCL2, BMP7, BRAF, BRCA1, BRCA2, BTG2, C6orf89, CA2, CAD, CALR, CAMK2D, CBLB, CCND1, CDC5L, CDC6, CDK2, CDKN1A, CDKN1B, CITED2, COL1A1, CPNE1, CREBRF, CRIPAK, CRY1, CRY2, CST3, CTGF, CTSB, CTSV, C…
GO:0010243	response to organonitrogen compound	GO_BiologicalProcess-GOA_09.02.2016_16h18	4.3e-05	0.019	6.9e-08	2e-06	[3, 4]	Group32	23.8278	249	[AARS, ADCY3, ADCY6, ADCY9, ADIPOR1, AKAP1, AKAP6, AKR1B1, AKT2, APEX1, APP, APPL1, AQP7, ASCL1, ASNS, ATP2A2, ATP6AP1, ATP6V0B, ATP6V1B2, ATP6V1C1, ATP6V1E1, ATP6V1G1, ATP6V1H, BAIAP2, BAIAP2L1, BCL2, BMP7, BRAF, BRCA1, BTG2, C12orf76, C6orf89, CAD, CAMK2D, CAPN2, CCND1, CDC5L, CDC6, CDK1, CDK2, CDKN1A, CDKN1B, CEBPB, CHRNA1, CHRNA3, CHRNA5, CHRNA7, CHRNB4, COL1A1, COL4A1, COL4A6, CRY1, CRY2, CT…
GO:0070848	response to growth factor	GO_BiologicalProcess-GOA_09.02.2016_16h18	6.1e-07	0.0003	6.9e-08	2e-06	[4]	Group32	25.0495	253	[ACVR1, ACVR2B, ADAMTS12, ADAMTS3, ADAMTS7, ADCY3, ADCY6, ADCY9, ADRBK1, AGO3, APEX1, APP, ARHGEF1, ARHGEF11, ARHGEF6, ASCL1, BAMBI, BCL9L, BMP2, BMP7, BRAF, C6orf89, CAD, CAMK2D, CAPN5, CCNT1, CCNT2, CD63, CDC5L, CDKN1A, CDKN1B, CEP57, CHRDL1, CITED2, COL1A1, COL2A1, COL4A2, CRB2, CRK, CRKL, CTDSPL2, CTGF, CUL3, CYR61, DDIT4, DLL1, DLL4, DMD, DNM2, DTYMK, DUSP22, DUSP4, DUSP6, DUSP7, E2F1, EEF2K…
GO:0071310	cellular response to organic substance	GO_BiologicalProcess-GOA_09.02.2016_16h18	6e-07	0.0003	6.9e-08	2e-06	[4]	Group32	22.5924	556	[AAAS, AARS, ABCA1, ABL2, ACACA, ACD, ACVR1, ACVR2B, ADAMTS12, ADAMTS3, ADAMTS7, ADCY3, ADCY6, ADCY9, ADD1, ADIPOR1, ADRBK1, AGO3, AKAP1, AKAP6, AKR1B1, AKT2, AMFR, APEX1, APP, APPL1, AQP7, ARFGAP1, ARFGAP3, ARHGEF1, ARHGEF11, ARHGEF6, ARIH1, ASNS, ATF3, ATF6B, ATP6AP1, ATP6V0B, ATP6V1B2, ATP6V1C1, ATP6V1E1, ATP6V1G1, ATP6V1H, BAIAP2, BAIAP2L1, BAMBI, BBC3, BCL2, BCL9L, BIRC5, BMP2, BMP7, BRAF, B…
GO:1901699	cellular response to nitrogen compound	GO_BiologicalProcess-GOA_09.02.2016_16h18	3.5e-05	0.015	6.9e-08	2e-06	[4]	Group32	24.8021	188	[ADCY3, ADCY6, ADCY9, ADIPOR1, AGO3, AKAP1, AKAP6, AKR1B1, AKT2, APEX1, APP, APPL1, AQP7, ATP6AP1, ATP6V0B, ATP6V1B2, ATP6V1C1, ATP6V1E1, ATP6V1G1, ATP6V1H, BAIAP2, BAIAP2L1, BRAF, BRCA1, C6orf89, CAMK2D, CAPN2, CDC5L, CDC6, CDK2, CEBPB, COL1A1, COL4A1, COL4A6, CUL3, DENND4C, DIAPH1, DNM2, DNMT3A, DROSHA, DUSP6, DUSP7, EEF2K, EGR1, EIF4EBP1, EIF4EBP2, ERRFI1, EZR, FAS, FBN1, FGF9, FGFR1, FGFR3, F…
GO:0071417	cellular response to organonitrogen compound	GO_BiologicalProcess-GOA_09.02.2016_16h18	5e-05	0.021	6.9e-08	2e-06	[4, 5]	Group32	25	175	[ADCY3, ADCY6, ADCY9, ADIPOR1, AKAP1, AKAP6, AKR1B1, AKT2, APEX1, APP, APPL1, AQP7, ATP6AP1, ATP6V0B, ATP6V1B2, ATP6V1C1, ATP6V1E1, ATP6V1G1, ATP6V1H, BAIAP2, BAIAP2L1, BRAF, BRCA1, C6orf89, CAMK2D, CAPN2, CDC5L, CDC6, CDK2, CEBPB, COL1A1, COL4A1, COL4A6, CUL3, DENND4C, DIAPH1, DNM2, DNMT3A, DUSP6, DUSP7, EEF2K, EGR1, EIF4EBP1, EIF4EBP2, ERRFI1, EZR, FAS, FBN1, FGF9, FGFR1, FGFR3, FOXO1, GFPT1, G…
GO:1901652	response to peptide	GO_BiologicalProcess-GOA_09.02.2016_16h18	7.1e-05	0.03	6.9e-08	2e-06	[4, 5]	Group32	24.9631	169	[ADCY3, ADCY6, ADCY9, ADIPOR1, AKAP1, AKR1B1, AKT2, APEX1, APPL1, ATP2A2, ATP6AP1, ATP6V0B, ATP6V1B2, ATP6V1C1, ATP6V1E1, ATP6V1G1, ATP6V1H, BAIAP2, BAIAP2L1, BMP7, BRAF, BTG2, C6orf89, CAMK2D, CDC5L, CDC6, CDK2, CDKN1B, COL1A1, CRY1, CRY2, CTGF, CTSB, CUL3, CXCL12, DAG1, DENND4C, DUSP6, DUSP7, EEF2K, EGR1, EGR2, EIF2B1, EIF4EBP1, EIF4EBP2, ERRFI1, FAS, FBN1, FGF9, FGFR1, FGFR3, FOXO1, GFPT1, GGH…
GO:0043434	response to peptide hormone	GO_BiologicalProcess-GOA_09.02.2016_16h18	4.4e-05	0.019	6.9e-08	2e-06	[4, 5, 6]	Group32	25.3521	162	[ADCY3, ADCY6, ADCY9, ADIPOR1, AKAP1, AKT2, APEX1, APPL1, ATP2A2, ATP6AP1, ATP6V0B, ATP6V1B2, ATP6V1C1, ATP6V1E1, ATP6V1G1, ATP6V1H, BAIAP2, BAIAP2L1, BMP7, BRAF, BTG2, C6orf89, CAMK2D, CDC5L, CDC6, CDK2, CDKN1B, COL1A1, CRY1, CRY2, CTGF, CTSB, CUL3, CXCL12, DAG1, DENND4C, DUSP6, DUSP7, EEF2K, EGR1, EGR2, EIF2B1, EIF4EBP1, EIF4EBP2, ERRFI1, FAS, FBN1, FGF9, FGFR1, FGFR3, FOXO1, GFPT1, GGH, GJA1, …
GO:0071560	cellular response to transforming growth factor beta stimulus	GO_BiologicalProcess-GOA_09.02.2016_16h18	6.9e-05	0.029	6.9e-05	0.0002	[4, 6]	Group33	28.9474	77	[ACVR1, BAMBI, BCL9L, CAPN5, CCNT1, CCNT2, CITED2, COL1A1, COL4A2, DNM2, DUSP22, FBN1, FBN2, FKBP1A, FLCN, FOS, GARS, GCNT2, GDF10, GDF15, GPI, HDAC1, HDAC2, HIPK2, HSPA5, HTRA1, HYAL2, ING2, ITGA8, ITGB1, ITGB5, JUN, KLF10, LDLRAD4, LIMS1, LTBP1, MAP3K1, NCOR1, NEDD4L, NEDD8, NREP, PARP1, PDPK1, PMEPA1, PPARGC1A, PPM1A, PPP1R15A, PRDM16, PXDN, RASL11B, RBL1, RHOA, RNASEH2A, SMAD2, SMAD7, SMURF1,…
GO:0044085	cellular component biogenesis	GO_BiologicalProcess-GOA_09.02.2016_16h18	1.8e-15	1.1e-12	5.6e-28	2.9e-26	[2]	Group34	24.4094	682	[AASS, ABCA1, ABCC4, ABL2, ACACA, ACD, ACOT13, ACSL3, ACTB, ACTC1, ACTG1, ADD1, ADNP, AGFG1, AGO3, AGRN, AHI1, AK7, AKR1B1, ALDH5A1, AMFR, ANK3, ANLN, ANTXR1, APEX1, APP, ARF1, ARFGEF1, ARFIP2, ARHGEF6, ARL2, ARPC4, ARPIN, ASF1B, ASIC1, ASPM, ATG16L2, ATG2A, ATG2B, ATG4B, ATG4D, ATPAF1, ATR, ATXN2, AURKA, AURKB, B9D1, BAHCC1, BAIAP2, BAIAP2L1, BAZ2A, BBC3, BBIP1, BBS10, BBS12, BBS7, BCL2, BCLAF1,…
GO:0022607	cellular component assembly	GO_BiologicalProcess-GOA_09.02.2016_16h18	3.4e-15	2.1e-12	5.6e-28	2.9e-26	[3]	Group34	24.6142	638	[AASS, ABCA1, ABCC4, ABL2, ACACA, ACD, ACOT13, ACSL3, ACTB, ACTC1, ACTG1, ADD1, ADNP, AGFG1, AGO3, AGRN, AHI1, AK7, AKR1B1, ALDH5A1, AMFR, ANK3, ANLN, ANTXR1, APEX1, APP, ARF1, ARFGEF1, ARFIP2, ARHGEF6, ARL2, ARPC4, ARPIN, ASF1B, ASIC1, ASPM, ATG16L2, ATG2A, ATG2B, ATG4B, ATG4D, ATPAF1, ATR, ATXN2, AURKA, AURKB, B9D1, BAHCC1, BAIAP2, BAIAP2L1, BAZ2A, BBC3, BBIP1, BBS10, BBS12, BBS7, BCL2, BCLAF1,…
GO:0043933	macromolecular complex subunit organization	GO_BiologicalProcess-GOA_09.02.2016_16h18	1.4e-25	9.7e-23	5.6e-28	2.9e-26	[3]	Group34	26.3255	715	[AASS, ABCA1, ABI1, ABL2, ACACA, ACOT13, ACSL3, ACTB, ACTC1, ACTR6, ADAMTS3, ADD1, AEBP2, AGFG1, AGO3, AKR1B1, ALDH5A1, AMFR, ANLN, ANP32E, ANTXR1, APBB1, ARF1, ARFGEF1, ARFIP2, ARID1A, ARID4A, ARID5B, ARL2, ARPC4, ARPIN, ASF1B, ASIC1, ASPM, ASXL1, ATAD2, ATF2, ATPAF1, ATR, ATXN2, AURKA, AURKB, BAHCC1, BAIAP2, BAIAP2L1, BAZ2A, BBC3, BBS10, BBS12, BCL2, BCL6, BCLAF1, BEND3, BHLHE40, BIRC5, BLOC1S2…
GO:0065003	macromolecular complex assembly	GO_BiologicalProcess-GOA_09.02.2016_16h18	9e-11	5.2e-08	5.6e-28	2.9e-26	[4]	Group34	24.9119	424	[AASS, ABCA1, ACACA, ACOT13, ACSL3, ADD1, AGO3, AKR1B1, ALDH5A1, AMFR, ANLN, ANTXR1, ARF1, ARFGEF1, ARFIP2, ARL2, ARPC4, ARPIN, ASF1B, ASIC1, ASPM, ATPAF1, ATR, ATXN2, AURKA, AURKB, BAHCC1, BAIAP2, BAIAP2L1, BAZ2A, BBC3, BBS10, BBS12, BCLAF1, BHLHE40, BIRC5, BLOC1S2, BRAF, BRD2, BRK1, C1QTNF6, CALR, CAMK2D, CAPZA1, CASC5, CBR4, CCDC40, CCDC88C, CCNB1, CCT8, CDC42EP1, CDC42EP2, CDC45, CDH2, CDK1, …
GO:0071822	protein complex subunit organization	GO_BiologicalProcess-GOA_09.02.2016_16h18	9.2e-13	5.6e-10	5.6e-28	2.9e-26	[4]	Group34	25.0515	486	[AASS, ABI1, ABL2, ACACA, ACOT13, ACTC1, ADAMTS3, ADD1, AGFG1, AKR1B1, ALDH5A1, AMFR, ANLN, ANP32E, ARF1, ARFGEF1, ARFIP2, ARID1A, ARL2, ARPC4, ARPIN, ASF1B, ASIC1, ASPM, ATPAF1, AURKA, AURKB, BAIAP2, BAIAP2L1, BBC3, BBS10, BBS12, BCL2, BCLAF1, BHLHE40, BIRC5, BLOC1S2, BNIP3, BORA, BRAF, BRD2, BRK1, BUD31, C1QTNF6, CALR, CAMK2D, CAPZA1, CASC5, CBR4, CCDC40, CCDC88C, CCNB1, CCT8, CDC42EP1, CDC42EP…
GO:0006461	protein complex assembly	GO_BiologicalProcess-GOA_09.02.2016_16h18	6.4e-07	0.00031	5.6e-28	2.9e-26	[4, 5]	Group34	23.9554	344	[AASS, ACACA, ACOT13, ADD1, AKR1B1, ALDH5A1, AMFR, ANLN, ARF1, ARFGEF1, ARFIP2, ARL2, ARPC4, ARPIN, ASF1B, ASIC1, ASPM, ATPAF1, AURKA, AURKB, BAIAP2, BAIAP2L1, BBC3, BBS10, BBS12, BCLAF1, BHLHE40, BIRC5, BLOC1S2, BRAF, BRD2, BRK1, C1QTNF6, CALR, CAMK2D, CAPZA1, CASC5, CBR4, CCDC40, CCDC88C, CCNB1, CCT8, CDC42EP1, CDC42EP2, CDH2, CDK1, CDKN1B, CENPC, CENPE, CENPF, CENPH, CENPI, CENPL, CENPM, CENPO…
GO:0071824	protein-DNA complex subunit organization	GO_BiologicalProcess-GOA_09.02.2016_16h18	6.2e-09	3.5e-06	6.2e-09	2.2e-07	[4]	Group35	36.1386	73	[ANP32E, ARID1A, ASF1B, BHLHE40, BRD2, CASC5, CDC45, CENPC, CENPE, CENPF, CENPH, CENPI, CENPL, CENPM, CENPO, CENPP, CENPU, CENPV, CHAF1A, CHAF1B, CTCF, GTF2H5, H1F0, H1FX, H2AFX, H2AFY, H2AFY2, HAT1, HELLS, HIRA, HIST1H2BD, HIST1H2BN, HIST2H2BC, HIST2H2BE, HIST2H2BF, HIST2H3A, HJURP, HMGA1, HMGB1, HMGB2, KALRN, KAT6A, MCM2, MCM7, MIS18A, MIS18BP1, NAP1L1, NAP1L3, NAP1L4, NASP, NPM1, OIP5, POGZ, P…
GO:0071826	ribonucleoprotein complex subunit organization	GO_BiologicalProcess-GOA_09.02.2016_16h18	2.3e-05	0.01	2.3e-05	0.00018	[4]	Group36	30.531	69	[AGO3, ANTXR1, ATR, ATXN2, CELF1, CIRBP, CLNS1A, CLP1, CNOT1, DDX39B, EIF2D, EIF2S3, EIF3E, EIF3H, HEXIM1, HNRNPC, ISY1, KLC1, LIMD1, LSM14A, LSM4, LUC7L, LUC7L3, MRPS11, NCBP2, NEDD4, NOCT, NPM1, PATL1, PLD6, RBM5, RC3H1, RPF2, RPL12, RPL15, RPL23A, RPL3, RPL5, RPS27L, RRP7BP, RSL24D1, SART1, SBDS, SCAF11, SF1, SFSWAP, SLU7, SNRNP200, SNRPB, SNRPC, SNRPD1, SNRPD2, SNRPD3, SNRPF, SRPK2, SRSF10, S…
GO:0022618	ribonucleoprotein complex assembly	GO_BiologicalProcess-GOA_09.02.2016_16h18	1.5e-05	0.007	2.3e-05	0.00018	[4, 5, 6]	Group36	31.0185	67	[AGO3, ANTXR1, ATR, ATXN2, CELF1, CIRBP, CLNS1A, CLP1, CNOT1, DDX39B, EIF2D, EIF2S3, EIF3E, EIF3H, HEXIM1, HNRNPC, ISY1, LIMD1, LSM14A, LSM4, LUC7L, LUC7L3, MRPS11, NCBP2, NEDD4, NOCT, NPM1, PATL1, RBM5, RC3H1, RPF2, RPL12, RPL15, RPL23A, RPL3, RPL5, RPS27L, RRP7BP, RSL24D1, SART1, SBDS, SCAF11, SF1, SFSWAP, SLU7, SNRNP200, SNRPB, SNRPC, SNRPD1, SNRPD2, SNRPD3, SNRPF, SRPK2, SRSF10, SRSF5, SRSF6,…
GO:0072358	cardiovascular system development	GO_BiologicalProcess-GOA_09.02.2016_16h18	0.0001	0.044	0.0001	0.0001	[4, 5, 6]	Group37	23.5462	247	[ACTA2, ACTC1, ACVR1, ACVR2B, ADAM19, ADM2, ADRBK1, AHI1, AKAP6, ALPK3, ANKS6, ARID1A, ASXL1, ATF2, ATP5B, B4GALT1, B9D1, BBS7, BMP2, BMP7, BRCA1, C2CD3, C5, CAD, CALR, CAMK2D, CCDC40, CCNB1, CDH2, CDK1, CHRNA3, CHRNA7, CITED2, CLN5, CNTRL, COL11A1, COL18A1, COL1A1, COL2A1, COL4A1, COL4A2, COL5A1, CPE, CRB2, CRKL, CSPG4, CTGF, CTH, CXADR, CXCL12, CYR61, DCTN5, DDIT3, DDX17, DDX39B, DLL1, DLL4, DN…
GO:0080135	regulation of cellular response to stress	GO_BiologicalProcess-GOA_09.02.2016_16h18	1.5e-11	9.1e-09	1.5e-11	6.3e-10	[3, 4, 5]	Group38	29.2929	203	[AAAS, ANTXR1, APBB1, APEX1, ATAD5, ATR, BAG3, BBC3, BCL6, BCLAF1, BMP2, BMP7, BNIP3, BRAF, BRCA1, BRD4, CAMK2D, CCAR2, CEBPG, CHORDC1, CREB3L1, CREBRF, CRY1, CTGF, CTTN, CXCL12, DACT1, DDIT3, DDX39B, DEK, DEPDC1B, DERL2, DHFR, DLG1, DNAJB6, DNAJC2, DNAJC3, DNAJC7, DUSP22, DYRK1A, EDEM1, EIF2AK3, EP300, EPHA4, EPHB1, ERN1, ERP29, EZR, FBXW7, FEM1B, FEZ1, FIGN, FKBP4, FKTN, FLT4, FOXM1, FOXO1, FZD…
GO:0006793	phosphorus metabolic process	GO_BiologicalProcess-GOA_09.02.2016_16h18	5.3e-08	2.8e-05	5.3e-08	1.6e-06	[3]	Group39	22.2695	732	[AAK1, AASS, ABCA1, ABHD12, ABHD3, ABHD4, ABHD5, ABI1, ABL2, ACACA, ACOT13, ACP1, ACSL3, ACVR1, ACVR1B, ACVR2B, ACYP1, ADAM10, ADCY3, ADCY6, ADCY9, ADM2, ADNP, ADPGK, ADRBK1, AGPAT4, AK2, AK7, AK9, AKAP1, AKAP10, AKAP12, AKAP6, AKAP8L, AKR1B1, AKT2, AKT3, AKTIP, ALDH18A1, ALDH5A1, ALPK3, ANTXR1, APLP2, APP, ARF1, ARFGEF3, ARHGEF6, ARPP19, ATCAY, ATF2, ATF3, ATP5B, ATP5G1, ATP5G3, ATP5S, ATP6AP1, …
GO:0006796	phosphate-containing compound metabolic process	GO_BiologicalProcess-GOA_09.02.2016_16h18	2.8e-08	1.5e-05	5.3e-08	1.6e-06	[4]	Group39	22.3908	723	[AAK1, ABCA1, ABHD12, ABHD3, ABHD4, ABHD5, ABI1, ABL2, ACACA, ACP1, ACSL3, ACVR1, ACVR1B, ACVR2B, ACYP1, ADAM10, ADCY3, ADCY6, ADCY9, ADM2, ADNP, ADPGK, ADRBK1, AGPAT4, AK2, AK7, AK9, AKAP1, AKAP10, AKAP12, AKAP6, AKAP8L, AKR1B1, AKT2, AKT3, AKTIP, ALDH18A1, ALDH5A1, ALPK3, ANTXR1, APLP2, APP, ARF1, ARFGEF3, ARHGEF6, ARPP19, ATF2, ATF3, ATP5B, ATP5G1, ATP5G3, ATP5S, ATP6AP1, ATP6V1B2, ATR, ATRAID…
GO:0023051	regulation of signaling	GO_BiologicalProcess-GOA_09.02.2016_16h18	6e-07	0.0003	1.9e-12	8.1e-11	[2, 3]	Group4	22.0714	699	[AAK1, ABCA1, ABL2, ACVR1, ACVR1B, ACVR2B, ADAMTS12, ADAMTS3, ADIPOR1, ADNP, ADRBK1, AGRN, AKAP12, AKAP6, AKR1B1, AKT2, ANKRD10, ANTXR1, APCDD1, APEX1, APLP2, APP, ARF1, ARFGEF1, ARFGEF2, ARFGEF3, ARHGAP11A, ARHGAP11B, ARHGAP17, ARHGAP21, ARHGAP23, ARHGAP33, ARHGAP39, ARHGAP5, ARHGEF1, ARHGEF11, ARHGEF39, ARHGEF6, ARL2, ARPP19, ARRDC3, ASCL1, ASIC1, ASPM, ASXL1, ATAD1, ATAD5, ATF3, ATP1B3, ATP2A2…
GO:0010646	regulation of cell communication	GO_BiologicalProcess-GOA_09.02.2016_16h18	6.2e-08	3.3e-05	1.9e-12	8.1e-11	[3, 4]	Group4	22.3341	710	[AAK1, ABCA1, ABL2, ACVR1, ACVR1B, ACVR2B, ADAMTS12, ADAMTS3, ADIPOR1, ADNP, ADRBK1, AGRN, AKAP12, AKAP6, AKR1B1, AKT2, ANKRD10, ANTXR1, APCDD1, APEX1, APLP2, APP, ARF1, ARFGEF1, ARFGEF2, ARFGEF3, ARHGAP11A, ARHGAP11B, ARHGAP17, ARHGAP21, ARHGAP23, ARHGAP33, ARHGAP39, ARHGAP5, ARHGEF1, ARHGEF11, ARHGEF39, ARHGEF6, ARL2, ARPP19, ARRDC3, ASCL1, ASIC1, ASPM, ASXL1, ATAD1, ATAD5, ATF3, ATP2A2, ATP2C1…
GO:0009966	regulation of signal transduction	GO_BiologicalProcess-GOA_09.02.2016_16h18	8.4e-07	0.00041	1.9e-12	8.1e-11	[3, 4, 5]	Group4	22.2779	622	[AAK1, ABCA1, ABL2, ACVR1, ACVR1B, ACVR2B, ADAMTS12, ADAMTS3, ADIPOR1, ADRBK1, AGRN, AKAP12, AKAP6, AKR1B1, AKT2, ANKRD10, ANTXR1, APCDD1, APEX1, APLP2, APP, ARFGEF1, ARFGEF2, ARFGEF3, ARHGAP11A, ARHGAP11B, ARHGAP17, ARHGAP21, ARHGAP23, ARHGAP33, ARHGAP39, ARHGAP5, ARHGEF1, ARHGEF11, ARHGEF39, ARHGEF6, ARPP19, ARRDC3, ASCL1, ASPM, ASXL1, ATAD5, ATF3, ATP2C1, ATP6AP1, ATR, BAIAP2L1, BAMBI, BBC3, B…
GO:0035556	intracellular signal transduction	GO_BiologicalProcess-GOA_09.02.2016_16h18	1e-08	6.1e-06	1.9e-12	8.1e-11	[4, 5]	Group4	22.7654	652	[ABCA1, ABI1, ABL2, ACTB, ACTG1, ADCY3, ADCY6, ADCY9, ADIPOR1, AEN, AGO3, AKAP12, AKAP6, AKR1B1, AKT2, AKT3, ANP32A, ANTXR1, APEX1, ARF1, ARFGEF1, ARFGEF2, ARFGEF3, ARFIP2, ARHGAP11A, ARHGAP11B, ARHGAP17, ARHGAP21, ARHGAP23, ARHGAP33, ARHGAP39, ARHGAP5, ARHGEF1, ARHGEF11, ARHGEF39, ARHGEF6, ARL10, ARL2, ARL3, ARL8A, ARPC4, ARPP19, ASB1, ASB16, ASB3, ASB7, ATAD5, ATF2, ATF3, ATP2A2, ATP2C1, ATP6AP…
GO:0007049	cell cycle	GO_BiologicalProcess-GOA_09.02.2016_16h18	5.8e-43	4e-40	1.9e-42	1e-40	[3]	Group40	31.3067	587	[AAAS, ACTR1A, ACVR1, ACVR1B, ADCY3, AKT2, ALPK3, ANAPC1, ANAPC15, ANAPC5, ANK3, ANLN, ANTXR1, APBB1, APEX1, APLP2, APP, APPL1, ARHGEF11, ARL2, ARL3, ARL8A, ARPP19, ASCL1, ASNS, ASPM, ATF2, ATF5, ATR, ATRAID, ATRIP, AURKA, AURKB, BANF1, BCAT1, BCCIP, BCL2, BCR, BEX1, BHLHE40, BIRC5, BIRC6, BLCAP, BMP2, BMP7, BOP1, BORA, BRCA1, BRCA2, BRD4, BRD7, BRINP2, BRIP1, BUB1, BUB1B, BUB3, C2CD3, C6orf89, C…
GO:0007059	chromosome segregation	GO_BiologicalProcess-GOA_09.02.2016_16h18	1e-10	6.2e-08	1.9e-42	1e-40	[3]	Group40	34.5638	103	[ANAPC1, ANAPC15, ANAPC5, ARL8A, AURKB, BHLHE40, BIRC5, BRCA1, BRCA2, BRD4, BUB1, BUB1B, BUB3, CASC5, CCNB1, CDC16, CDC20, CDC23, CDC6, CDCA5, CDCA8, CDK5RAP2, CENPC, CENPE, CENPF, CEP55, CEP57, CEP85, CHMP3, CHMP6, CIT, CSNK2A1, CTCF, CUL3, DDX11, DDX3Y, DLGAP5, DSCC1, DUSP1, ERCC2, ESCO1, ESPL1, FAM175B, FANCD2, FBXW7, GEN1, H2AFY, HDAC8, HJURP, INCENP, KIF11, KIF18B, KIF22, KIF2C, KIFC1, KNSTR…
GO:0051301	cell division	GO_BiologicalProcess-GOA_09.02.2016_16h18	7.8e-14	4.8e-11	1.9e-42	1e-40	[3]	Group40	30.3244	215	[ANAPC1, ANAPC15, ANAPC5, ANK3, ANLN, ARHGEF11, ARL3, ARL8A, ARPP19, ASPM, ATRAID, AURKA, AURKB, BHLHE40, BIRC5, BIRC6, BMP7, BORA, BRCA2, BUB1, BUB1B, BUB3, C9orf114, CABLES2, CALR, CASC5, CCNB1, CCNB2, CCND1, CCND2, CCNL1, CCNL2, CCNT1, CCNT2, CCNY, CDC16, CDC20, CDC23, CDC6, CDC7, CDCA3, CDCA4, CDCA5, CDCA7, CDCA8, CDK1, CDK11A, CDK2, CDK20, CDKN1A, CDKN1B, CECR2, CENPC, CENPE, CENPF, CENPV, C…
GO:0022402	cell cycle process	GO_BiologicalProcess-GOA_09.02.2016_16h18	7.9e-37	5.5e-34	1.9e-42	1e-40	[3, 4]	Group40	32.5145	450	[AAAS, ACTR1A, ACVR1, ACVR1B, ADCY3, AKT2, ANAPC1, ANAPC15, ANAPC5, ANK3, ANLN, ANTXR1, APBB1, APEX1, APP, ARHGEF11, ARL3, ARL8A, ARPP19, ASPM, ATF2, ATF5, ATR, ATRAID, ATRIP, AURKA, AURKB, BANF1, BCAT1, BCL2, BHLHE40, BIRC5, BIRC6, BMP7, BORA, BRCA1, BRCA2, BRD4, BRD7, BRINP2, BRIP1, BUB1, BUB1B, BUB3, C2CD3, CALR, CAMK2D, CASC5, CAST, CCAR2, CCNB1, CCNB2, CCND1, CCND2, CCNL1, CCNL2, CCNT1, CCNT…
GO:0051302	regulation of cell division	GO_BiologicalProcess-GOA_09.02.2016_16h18	1e-05	0.0048	1.9e-42	1e-40	[3, 4]	Group40	28.7425	96	[ANAPC1, ANAPC15, ANAPC5, ANLN, ASPM, ATRAID, AURKA, AURKB, BIRC5, BIRC6, BMP7, BORA, BRCA2, BUB1, BUB1B, BUB3, CALR, CCNB1, CCND1, CCND2, CCNL1, CCNL2, CCNT1, CCNT2, CCNY, CDC16, CDC20, CDC23, CDC6, CDCA5, CDKN1A, CDKN1B, CENPE, CENPF, CENPV, CEP85, CHMP3, CIT, COL26A1, CSNK2A1, CUL3, DAPK3, DLGAP5, DLL1, DUSP1, E2F7, ESPL1, FBXO43, FGF9, FGFR3, FLCN, GEN1, H2AFY, IGF2, ITGB1BP1, KIF11, KIF18B, …
GO:0051726	regulation of cell cycle	GO_BiologicalProcess-GOA_09.02.2016_16h18	3.2e-20	2.1e-17	1.9e-42	1e-40	[3, 4]	Group40	30.0273	330	[AKT2, ALPK3, ANAPC1, ANAPC15, ANAPC5, ANLN, APBB1, APEX1, APP, ASCL1, ASNS, ASPM, ATF2, ATF5, ATRAID, AURKA, AURKB, BCCIP, BCL2, BCR, BEX1, BIRC5, BIRC6, BMP2, BMP7, BOP1, BORA, BRCA1, BRCA2, BRD4, BRD7, BRINP2, BUB1, BUB1B, BUB3, C6orf89, CABLES2, CALR, CAMK2D, CAMK2N1, CAST, CCAR2, CCNB1, CCNB2, CCND1, CCND2, CCNL1, CCNL2, CCNT1, CCNT2, CCNY, CCPG1, CDC16, CDC20, CDC23, CDC45, CDC5L, CDC6, CDC…
GO:0000278	mitotic cell cycle	GO_BiologicalProcess-GOA_09.02.2016_16h18	2e-36	1.3e-33	1.9e-42	1e-40	[4]	Group40	34.47	374	[AAAS, ACTR1A, ACVR1, ACVR1B, ANAPC1, ANAPC15, ANAPC5, ANK3, ANLN, APEX1, APP, ARL8A, ARPP19, ASCL1, ASNS, ASPM, ATF2, AURKA, AURKB, BANF1, BCAT1, BCL2, BHLHE40, BIRC5, BIRC6, BMP7, BORA, BRCA2, BRD4, BRD7, BRINP2, BRIP1, BUB1, BUB1B, BUB3, CAMK2D, CASC5, CCNB1, CCNB2, CCND1, CCNY, CDC16, CDC20, CDC23, CDC45, CDC5L, CDC6, CDC7, CDCA3, CDCA5, CDCA8, CDK1, CDK10, CDK11A, CDK2, CDK5RAP2, CDKN1A, CDK…
GO:0045786	negative regulation of cell cycle	GO_BiologicalProcess-GOA_09.02.2016_16h18	1.5e-11	8.9e-09	1.9e-42	1e-40	[3, 4, 5]	Group40	30.8411	165	[AKT2, ANAPC1, ANAPC15, ANAPC5, APBB1, ATF2, ATF5, ATRAID, AURKB, BCL2, BMP2, BMP7, BRCA1, BRD4, BRD7, BRINP2, BUB1, BUB1B, BUB3, CALR, CAST, CCNB1, CCND1, CDC16, CDC20, CDC23, CDC5L, CDK1, CDK2, CDK5R1, CDK5RAP2, CDKN1A, CDKN1B, CDKN2C, CENPF, CLSPN, CSNK2A1, CTDSP2, CUL3, DACT1, DDIT3, DDX39B, DGKZ, DLG1, DST, DUSP1, E2F7, EIF4G2, ERN1, ESPL1, FANCI, FBXO31, FBXO43, FBXW7, FGFR3, FOXM1, FOXN3, …
GO:0045787	positive regulation of cell cycle	GO_BiologicalProcess-GOA_09.02.2016_16h18	1.1e-05	0.0053	1.9e-42	1e-40	[3, 4, 5]	Group40	28.3333	102	[APEX1, APP, ASCL1, ASNS, ATRAID, AURKA, AURKB, BIRC5, BRCA1, BRCA2, BRD4, C6orf89, CALR, CAST, CCAR2, CCNB1, CCND1, CCND2, CCNL1, CCNL2, CCNT1, CCNT2, CCNY, CCPG1, CDC45, CDC6, CDC7, CDCA5, CDK1, CDK10, CDK2, CDK5R1, CDKN1A, CDKN1B, CENPV, CIT, CITED2, COL26A1, CTGF, CUL3, DBF4B, DLGAP5, E2F7, EIF4EBP1, ESPL1, FGFR1, GEN1, GTSE1, H2AFY, HMGA2, ID2, IGF2, KIF23, LONP1, LRP5, LSM10, MAD2L1, MCM2, …
GO:0048285	organelle fission	GO_BiologicalProcess-GOA_09.02.2016_16h18	1.4e-12	8.6e-10	1.9e-42	1e-40	[4]	Group40	30.414	191	[ADCY3, ANAPC1, ANAPC15, ANAPC5, ANLN, ARL8A, ARPP19, ASPM, AURKA, AURKB, BHLHE40, BIRC5, BIRC6, BMP7, BNIP3, BORA, BRCA2, BUB1, BUB1B, BUB3, CALR, CASC5, CCAR2, CCNB1, CCNB2, CDC16, CDC20, CDC23, CDC6, CDCA3, CDCA5, CDCA8, CDK1, CDK11A, CDK2, CENPC, CENPE, CENPF, CENPV, CEP55, CEP57, CEP63, CEP85, CHMP3, CHMP6, CIT, CKAP5, CKS2, CLASP2, COL26A1, CSNK1A1, CSNK2A1, CUL3, CYP26B1, DAPK3, DEPDC1B, D…
GO:0000075	cell cycle checkpoint	GO_BiologicalProcess-GOA_09.02.2016_16h18	1.6e-13	1e-10	1.9e-42	1e-40	[4, 5]	Group40	38.1132	101	[ANAPC1, ANAPC15, ANAPC5, ANTXR1, ATF2, ATR, ATRIP, AURKB, BIRC5, BRCA1, BRD4, BRIP1, BUB1, BUB1B, BUB3, CASC5, CCAR2, CCNB1, CCND1, CDC16, CDC20, CDC23, CDC45, CDC5L, CDC6, CDK1, CDK2, CDK5RAP2, CDKN1A, CDKN1B, CDT1, CENPF, CEP63, CLSPN, CRY1, CSNK2A1, DDX39B, DEPDC1B, DGKZ, DLG1, DNA2, DTL, DUSP1, E2F1, FANCI, FBXO31, FEM1B, FOXN3, GEN1, GIGYF2, GTSE1, H2AFX, HMGA2, HUS1, KNTC1, MAD2L1, MAPKAPK…
GO:0007346	regulation of mitotic cell cycle	GO_BiologicalProcess-GOA_09.02.2016_16h18	1.9e-10	1.1e-07	1.9e-42	1e-40	[4, 5]	Group40	30.2682	158	[ANAPC1, ANAPC15, ANAPC5, ANLN, APEX1, APP, ASCL1, ASNS, ATF2, AURKA, BCL2, BIRC5, BMP7, BORA, BRCA2, BRD4, BRD7, BRINP2, BUB1, BUB1B, BUB3, CAMK2D, CCNB1, CCND1, CDC16, CDC20, CDC23, CDC45, CDC6, CDC7, CDCA5, CDK1, CDK10, CDK2, CDKN1A, CDKN1B, CENPE, CENPF, CEP85, CHMP3, CIT, CLSPN, COL26A1, CSNK2A1, CTDSP2, CUL3, DACT1, DAPK3, DBF4B, DGKZ, DLG1, DLGAP5, DUSP1, E2F1, E2F7, EIF4EBP1, ERCC2, ESPL1…
GO:0010564	regulation of cell cycle process	GO_BiologicalProcess-GOA_09.02.2016_16h18	5.2e-12	3.1e-09	1.9e-42	1e-40	[4, 5]	Group40	30.4714	181	[AKT2, ANAPC1, ANAPC15, ANAPC5, ANLN, APEX1, APP, ATF5, ATRAID, AURKA, AURKB, BCL2, BIRC5, BIRC6, BMP7, BORA, BRCA1, BRCA2, BRD4, BRD7, BUB1, BUB1B, BUB3, CALR, CAMK2D, CAST, CCAR2, CCNB1, CCND1, CCND2, CCNL1, CCNL2, CCNT1, CCNT2, CCNY, CDC16, CDC20, CDC23, CDC45, CDC5L, CDC6, CDC7, CDCA5, CDK1, CDK10, CDK2, CDK5R1, CDK5RAP2, CDKN1A, CDKN1B, CDT1, CENPE, CENPF, CENPV, CEP85, CHMP3, CHORDC1, CIT, …
GO:0044770	cell cycle phase transition	GO_BiologicalProcess-GOA_09.02.2016_16h18	1.5e-18	9.9e-16	1.9e-42	1e-40	[4, 5]	Group40	34.7826	184	[ACTR1A, ACVR1, ACVR1B, ANAPC1, ANAPC15, ANAPC5, ANLN, APEX1, APP, ARPP19, ATF5, AURKA, BCAT1, BCL2, BIRC5, BORA, BRD4, BRD7, BRIP1, BUB1, BUB1B, BUB3, CAMK2D, CCNB1, CCNB2, CCND1, CCNY, CDC16, CDC20, CDC23, CDC45, CDC5L, CDC6, CDC7, CDCA5, CDK1, CDK10, CDK2, CDK5RAP2, CDKN1A, CDKN1B, CDKN2C, CDT1, CENPE, CENPF, CEP135, CEP152, CEP192, CEP57, CEP63, CEP70, CEP78, CIT, CKAP5, CKS1B, CLASP2, CLSPN,…
GO:0098813	nuclear chromosome segregation	GO_BiologicalProcess-GOA_09.02.2016_16h18	1.3e-07	7e-05	1.9e-42	1e-40	[4, 5]	Group40	33.4802	76	[ANAPC1, ANAPC15, ANAPC5, AURKB, BHLHE40, BRCA2, BUB1, BUB1B, BUB3, CASC5, CCNB1, CDC16, CDC20, CDC23, CDC6, CDCA5, CDCA8, CENPE, CENPF, CEP55, CEP57, CHMP3, CHMP6, CIT, CSNK2A1, CTCF, CUL3, DDX11, DLGAP5, DSCC1, DUSP1, ESCO1, ESPL1, FAM175B, FANCD2, FBXW7, GEN1, H2AFY, HDAC8, KIF18B, KIF22, KIF2C, KIFC1, KNSTRN, KPNB1, MAD2L1, MAU2, MRE11A, NAA50, NCAPD2, NCAPD3, NCAPG, NCAPH, NDC1, NDC80, NUSAP…
GO:1903047	mitotic cell cycle process	GO_BiologicalProcess-GOA_09.02.2016_16h18	1.7e-29	1.2e-26	1.9e-42	1e-40	[4, 5]	Group40	34.1731	312	[AAAS, ACTR1A, ACVR1, ACVR1B, ANAPC1, ANAPC15, ANAPC5, ANK3, ANLN, APEX1, APP, ARL8A, ARPP19, ASPM, ATF2, AURKA, AURKB, BANF1, BCAT1, BCL2, BHLHE40, BIRC5, BIRC6, BMP7, BORA, BRD4, BRD7, BRIP1, BUB1, BUB1B, BUB3, CAMK2D, CASC5, CCNB1, CCNB2, CCND1, CCNY, CDC16, CDC20, CDC23, CDC45, CDC6, CDC7, CDCA3, CDCA5, CDCA8, CDK1, CDK10, CDK11A, CDK2, CDK5RAP2, CDKN1A, CDKN1B, CDKN2C, CDT1, CENPC, CENPE, CE…
GO:0000819	sister chromatid segregation	GO_BiologicalProcess-GOA_09.02.2016_16h18	5.6e-10	3.2e-07	1.9e-42	1e-40	[4, 5, 6]	Group40	39.6341	65	[ANAPC1, ANAPC15, ANAPC5, BUB1, BUB1B, BUB3, CCNB1, CDC16, CDC20, CDC23, CDC6, CDCA5, CDCA8, CENPE, CENPF, CEP55, CEP57, CHMP3, CHMP6, CIT, CSNK2A1, CTCF, CUL3, DDX11, DLGAP5, DSCC1, DUSP1, ESCO1, ESPL1, FBXW7, GEN1, H2AFY, HDAC8, KIF18B, KIF22, KIF2C, KIFC1, KNSTRN, KPNB1, MAD2L1, MAU2, MRE11A, NAA50, NCAPD2, NCAPD3, NCAPG, NCAPH, NDC80, NUSAP1, PLK1, POGZ, PTTG1, RAB11A, SEH1L, SFPQ, SGOL2, SMC…
GO:0007067	mitotic nuclear division	GO_BiologicalProcess-GOA_09.02.2016_16h18	6.5e-16	4e-13	1.9e-42	1e-40	[4, 5, 6]	Group40	34.6491	158	[ANAPC1, ANAPC15, ANAPC5, ANLN, ARL8A, ARPP19, ASPM, AURKA, AURKB, BHLHE40, BIRC5, BIRC6, BMP7, BORA, BUB1, BUB1B, BUB3, CASC5, CCNB1, CCNB2, CDC16, CDC20, CDC23, CDC6, CDCA3, CDCA5, CDCA8, CDK1, CDK11A, CDK2, CENPC, CENPE, CENPF, CENPV, CEP55, CEP57, CEP63, CEP85, CHMP3, CHMP6, CIT, CKAP5, CLASP2, COL26A1, CSNK1A1, CSNK2A1, CUL3, DAPK3, DEPDC1B, DLGAP5, DSCC1, DUSP1, DYNLT1, ENSA, ESPL1, FAM175B…
GO:0010948	negative regulation of cell cycle process	GO_BiologicalProcess-GOA_09.02.2016_16h18	4.5e-09	2.5e-06	1.9e-42	1e-40	[4, 5, 6]	Group40	33.5714	94	[ANAPC1, ANAPC15, ANAPC5, ATF5, AURKB, BCL2, BMP7, BRCA1, BRD4, BRD7, BUB1, BUB1B, BUB3, CAST, CCNB1, CCND1, CDC16, CDC20, CDC23, CDC5L, CDK1, CDK2, CDK5RAP2, CDKN1A, CDKN1B, CENPF, CLSPN, CSNK2A1, CTDSP2, DACT1, DDX39B, DGKZ, DUSP1, E2F7, ESPL1, FANCI, FBXO31, FBXO43, FBXW7, FGFR3, FOXN3, GEN1, GIGYF2, GTSE1, H2AFY, HMGA2, HUS1, MAD2L1, MDM2, MRE11A, MSH2, MTBP, NAE1, NPM1, NUBP1, PCBP4, PLK1, P…
GO:0045930	negative regulation of mitotic cell cycle	GO_BiologicalProcess-GOA_09.02.2016_16h18	1.4e-08	8.2e-06	1.9e-42	1e-40	[4, 5, 6]	Group40	33.8583	86	[ANAPC1, ANAPC15, ANAPC5, ATF2, BCL2, BMP7, BRD7, BRINP2, BUB1, BUB1B, BUB3, CCNB1, CCND1, CDC16, CDC20, CDC23, CDK1, CDK2, CDKN1A, CDKN1B, CENPF, CLSPN, CSNK2A1, CTDSP2, DACT1, DGKZ, DLG1, DUSP1, E2F7, FANCI, FBXO31, FGFR3, FOXN3, FZD3, GEN1, GIGYF2, GTSE1, HECA, HMGA2, HUS1, KNTC1, MAD2L1, MDC1, MDM2, MRE11A, MSH2, MTBP, NAE1, PCBP4, PLK1, PLK2, PPP2R5C, PRKDC, PRMT2, PSMA3, PSMA6, PSMB2, PSMB7…
GO:0090068	positive regulation of cell cycle process	GO_BiologicalProcess-GOA_09.02.2016_16h18	9.6e-05	0.04	1.9e-42	1e-40	[4, 5, 6]	Group40	28.6792	76	[APEX1, APP, AURKA, AURKB, BIRC5, BRCA1, BRD4, CCAR2, CCNB1, CCND1, CDC45, CDC6, CDC7, CDCA5, CDK10, CDK2, CDK5R1, CDKN1A, CDKN1B, CENPV, CIT, COL26A1, CTGF, CUL3, DBF4B, DLGAP5, E2F7, ESPL1, GEN1, GTSE1, H2AFY, HMGA2, ID2, IGF2, KIF23, LRP5, LSM10, MAD2L1, MDM2, MED1, MTBP, NEUROG1, NPM1, NUSAP1, PCBP4, PKP4, PLK1, PLRG1, PPP2R5B, PPP2R5C, PSMA3, PSMA6, PSMB2, PSMB7, PSMD11, PSMD12, PSMD13, PSMD…
GO:1903829	positive regulation of cellular protein localization	GO_BiologicalProcess-GOA_09.02.2016_16h18	6.3e-05	0.027	3e-05	0.00021	[2, 3, 4, 5, 6]	Group41	27.3224	100	[ACSL3, AKAP6, AKT2, ARIH2, B3GAT3, BAMBI, BBC3, BCL2, BRCA1, CCNB1, CCT5, CCT8, CDK1, CDK5R1, CHORDC1, CHP1, CTDSPL2, DACT1, DKC1, DLG1, DMAP1, DPH6, DYNLL1, E2F1, EDEM1, EIF2AK3, EPHA2, EZR, FAM20B, FBXW7, FLNA, FZD5, GAS6, GLI3, GNL3, GSK3B, HNRNPK, HNRNPM, HYAL2, ITGB1, ITGB1BP1, JAK2, KAT2A, KCNB1, LEPROT, LGALS9, LRP4, MAPK8, MBD1, MDM2, MED1, MIS18A, MSN, NPEPPS, NUTF2, OAZ1, OAZ2, OGT, PA…
GO:1903827	regulation of cellular protein localization	GO_BiologicalProcess-GOA_09.02.2016_16h18	3e-05	0.013	3e-05	0.00021	[4, 5]	Group41	25.8176	150	[ACSL3, AKAP1, AKAP6, AKR1B1, AKT2, APPL1, ARIH2, B3GAT3, BAMBI, BBC3, BCL2, BMP7, BRCA1, CCNB1, CCT5, CCT8, CDCA5, CDH2, CDK1, CDK5R1, CDKN1A, CHORDC1, CHP1, CSNK1E, CTDSPL2, DACT1, DERL2, DKC1, DLG1, DMAP1, DPH6, DYNLL1, DYRK2, E2F1, EDEM1, EIF2AK3, EPHA2, EZR, FAM20B, FBXW7, FLCN, FLNA, FZD5, FZD7, GAS6, GBF1, GLI3, GNL3, GSK3B, H2AFY, HDAC8, HECTD1, HNRNPK, HNRNPM, HSPH1, HYAL2, INPP5K, ITGB1…
GO:2001020	regulation of response to DNA damage stimulus	GO_BiologicalProcess-GOA_09.02.2016_16h18	4.9e-07	0.00025	4.9e-07	1.1e-05	[4, 5, 6]	Group42	35.5828	58	[ANTXR1, APBB1, APEX1, ATAD5, ATR, BCLAF1, BRCA1, BRD4, CCAR2, CEBPG, CRY1, CXCL12, DDX39B, DEK, DEPDC1B, DYRK1A, FEM1B, FIGN, FOXM1, H2AFX, HMGA2, HMGB1, HNRNPK, ING2, KMT5A, LRIF1, MDM2, NSMCE4A, OGG1, OTUB1, PARP1, PARPBP, PCNA, PGAP2, PIAS4, PMAIP1, POLH, PPP4C, PPP4R2, RAD51AP1, RAD52, RFWD3, RIF1, RNF169, RPA2, SFRP2, SMYD2, TERF2, TERF2IP, THOC1, TRIP12, UBE2N, UBE2V1, UIMC1, USP1, USP47, …
GO:0006811	ion transport	GO_BiologicalProcess-GOA_09.02.2016_16h18	6.3e-07	0.00031	6.3e-07	1.4e-05	[4, 5]	Group43	14.3574	229	[ABCA1, ABCC4, ABCC5, ABCD3, ACACA, ACSL3, AKAP6, AKT2, ANK3, APEX1, AQP7, ARF1, ASIC1, ATP11B, ATP13A3, ATP1B3, ATP2A2, ATP2C1, ATP5B, ATP5G1, ATP5G3, ATP5S, ATP6AP1, ATP6V0B, ATP6V1B2, ATP6V1C1, ATP6V1E1, ATP6V1G1, ATP6V1H, ATP8B2, BBC3, BCL2, C12orf76, CA14, CA2, CA5B, CACHD1, CACNA1C, CAMK2D, CBARP, CCDC109B, CD63, CDK2, CDKN1B, CELSR3, CHORDC1, CHP1, CHRNA1, CHRNA3, CHRNA5, CHRNA7, CHRNB4, C…
GO:0000723	telomere maintenance	GO_BiologicalProcess-GOA_09.02.2016_16h18	6.3e-09	3.5e-06	6.3e-09	2.2e-07	[3, 4, 5, 6, 7]	Group44	40.7692	53	[ACD, ANTXR1, APEX1, ATR, AURKB, CCT5, CCT8, CNGB1, DHX36, DKC1, DNA2, ERCC1, FEN1, GNL3, HDAC8, HNRNPC, HNRNPU, LIG1, LRIG1, MAPK15, MAPKAPK5, MCRS1, MRE11A, NEK7, NHP2, OBFC1, PARP1, PCNA, PIF1, POLA2, POLD1, POLD3, POLDIP2, POLE, POLR1A, PRKDC, RAD50, RAD51D, RFC2, RFC3, RFC4, RPA1, RPA2, SLC19A1, SMG1, TERF2, TERF2IP, TNKS1BP1, TNKS2, UPF1, USP7, XRCC5, YLPM1]
GO:0006954	inflammatory response	GO_BiologicalProcess-GOA_09.02.2016_16h18	2e-06	0.00096	2e-06	3.4e-05	[4]	Group45	12.3077	88	[ACVR1, ADAMTS12, AHCY, AK7, ATRN, B4GALT1, BCL6, BCR, BMP2, BRD4, C5, CAMK1D, CCDC6, CD276, CD46, CD47, CEBPB, CHID1, CTNNBIP1, F2R, FAS, FEM1A, FOS, GARS, GBA, GJA1, GPRC5B, HDAC5, HMGB1, HMGB2, HNRNPA0, HNRNPC, HNRNPK, HYAL2, IGFBP4, IL20RB, JAK2, KDM6B, KIT, KLF4, LGALS9, LPL, MAPK13, MAPKAPK2, MVK, MYDGF, NDST1, NFATC4, NFE2L1, NFE2L2, NFKB2, NFX1, NGFR, NR1D2, NTRK2, OGG1, PARP4, PBK, PER1,…
GO:0002376	immune system process	GO_BiologicalProcess-GOA_09.02.2016_16h18	1.7e-05	0.0078	5.7e-06	9.1e-05	[1]	Group46	16.0213	451	[ABI1, ABL2, ACTB, ACTG1, ACTR1A, ACVR1B, ADAM10, ADCY3, ADCY6, ADCY9, ADD1, ADRBK1, AGO3, AHCY, AK7, AKAP17A, AKIRIN2, ALKBH5, ANLN, AP1G1, AP1S1, AP3B1, AP3D1, APP, AQP7, ARF1, ARID4A, ARIH2, ARPC4, ATF2, ATP1B3, ATP6AP1, ATP6V1H, ATXN1L, B4GALT1, BAIAP2, BCL2, BCL6, BCR, BNIP3, BRAF, BRCA2, BRK1, C5, C6orf89, CA2, CALR, CAMK1D, CAMK2D, CANX, CAPZA1, CBLB, CCNB2, CD248, CD276, CD37, CD46, CD47,…
GO:0006955	immune response	GO_BiologicalProcess-GOA_09.02.2016_16h18	5e-10	2.9e-07	5.7e-06	9.1e-05	[2]	Group46	13.7053	253	[ABI1, ABL2, ACTB, ACTG1, ADCY3, ADCY6, ADCY9, ADRBK1, AGO3, AHCY, AK7, AKIRIN2, AP1G1, APP, AQP7, ARPC4, ATF2, BAIAP2, BCL2, BCL6, BCR, BRAF, BRK1, C5, C6orf89, CAMK2D, CAPZA1, CBLB, CD276, CD37, CD46, CDKN1A, CDKN1B, CEBPB, CEBPG, CHID1, CMTM3, CNIH1, CNPY3, COL1A1, COL2A1, CPAMD8, CPLX2, CRK, CTSB, CTSC, CUL3, CXADR, CXCL12, CYFIP1, DAPK3, DHX36, DLG1, DLL1, DNAJA3, DUSP22, DUSP4, DUSP6, DUSP7…
GO:0002682	regulation of immune system process	GO_BiologicalProcess-GOA_09.02.2016_16h18	2.6e-05	0.011	5.7e-06	9.1e-05	[2, 3]	Group46	15.1057	250	[ABI1, ACTB, ACTG1, ACVR1B, ADAM10, AGO3, ALKBH5, AP1G1, AP1S1, AP3B1, AP3D1, ARF1, ARID4A, ARPC4, ATF2, ATP6AP1, ATP6V1H, ATXN1L, BAIAP2, BCL2, BCL6, BCR, BRAF, BRK1, C5, C6orf89, CA2, CALR, CAMK1D, CAMK2D, CBLB, CD276, CD37, CD46, CD47, CDKN1A, CDKN1B, CEBPB, CHAF1B, CMTM3, CNPY3, COL1A1, COL2A1, CRK, CTNNBIP1, CTSB, CUL3, CXADR, CXCL12, CYFIP1, DHPS, DLG1, DLL1, DNAJA3, DUSP22, DUSP4, DUSP6, D…
GO:0002684	positive regulation of immune system process	GO_BiologicalProcess-GOA_09.02.2016_16h18	2.8e-05	0.012	5.7e-06	9.1e-05	[2, 3, 4]	Group46	14.0791	146	[ABI1, ACTB, ACTG1, ACVR1B, ADAM10, AP1G1, AP3B1, AP3D1, ARPC4, ATF2, ATP6AP1, ATXN1L, BAIAP2, BCL2, BCL6, BRK1, C5, CA2, CALR, CAMK1D, CBLB, CD276, CD37, CD46, CD47, CDKN1A, CMTM3, CNPY3, CRK, CTNNBIP1, CTSB, CXCL12, CYFIP1, DHPS, DNAJA3, DUSP22, DUSP4, DUSP6, DUSP7, EFNB3, EGR3, EP300, EXOSC3, EZR, FADD, FLOT1, FOS, FOXJ1, FZD5, GAS6, GLI3, GPRC5B, HLA-A, HMGB1, HMGB2, HNRNPC, HSP90B1, HSPH1, I…
GO:0006952	defense response	GO_BiologicalProcess-GOA_09.02.2016_16h18	1e-06	0.00049	5.7e-06	9.1e-05	[3]	Group46	14.9194	296	[ABI1, ABL2, ACTB, ACTG1, ACVR1, ADAMTS12, ADCY3, ADCY6, ADCY9, ADRBK1, AGO3, AHCY, AK7, AKIRIN2, ALKBH5, AP1G1, AP1S1, APP, ARF1, ARPC4, ATF2, ATP6V1H, ATRN, B4GALT1, BAIAP2, BCL2, BCL6, BCR, BMP2, BNIP3, BRAF, BRD4, BRK1, C5, C6orf89, CAMK1D, CAMK2D, CAMLG, CAPZA1, CCDC6, CD276, CD37, CD46, CD47, CDKN1A, CDKN1B, CEBPB, CEBPG, CHAF1B, CHID1, CNPY3, COTL1, CPAMD8, CRK, CST3, CTNNBIP1, CTSB, CUL3,…
GO:0050778	positive regulation of immune response	GO_BiologicalProcess-GOA_09.02.2016_16h18	0.00011	0.046	5.7e-06	9.1e-05	[3, 4, 5]	Group46	13.6605	103	[ABI1, ACTB, ACTG1, AP1G1, ARPC4, ATF2, BAIAP2, BCL2, BRK1, C5, CBLB, CD46, CMTM3, CNPY3, CRK, CTSB, CYFIP1, DUSP22, DUSP4, DUSP6, DUSP7, EP300, EXOSC3, EZR, FADD, FLOT1, FOS, FZD5, GPRC5B, HLA-A, HMGB1, HMGB2, HNRNPC, HSP90B1, IGF2BP1, JUN, LAMP1, LGALS9, LSM14A, MAP2K4, MAP3K1, MAPK10, MAPK11, MAPK8, MAPK9, MAPKAPK2, MED1, MMP2, MYO10, NFKB2, NFKBIA, NR1D1, NR4A3, PAK1, PDPK1, PELI1, PELI2, PHB…
GO:0071840	cellular component organization or biogenesis	GO_BiologicalProcess-GOA_09.02.2016_16h18	6.1e-48	4.2e-45	6.1e-48	3.4e-46	[1]	Group47	24.4885	1592	[AAAS, AAK1, AASS, ABCA1, ABCC4, ABCD3, ABI1, ABL2, ACACA, ACD, ACOT13, ACSL3, ACTB, ACTC1, ACTG1, ACTR1A, ACTR6, ACVR1B, ADAM10, ADAMTS3, ADAMTS7, ADCY3, ADCY6, ADD1, ADIPOR1, ADNP, AEBP2, AGFG1, AGO3, AGRN, AHI1, AK7, AKAP6, AKR1B1, AKT2, AKT3, AKTIP, ALDH5A1, AMFR, ANAPC1, ANAPC15, ANAPC5, ANK3, ANLN, ANOS1, ANP32E, ANTXR1, AP1G1, AP1S1, AP3B1, AP3D1, AP4M1, APBB1, APEX1, APLP2, APOO, APP, APP…
GO:0016043	cellular component organization	GO_BiologicalProcess-GOA_09.02.2016_16h18	8.5e-48	5.9e-45	6.1e-48	3.4e-46	[2]	Group47	24.5801	1566	[AAAS, AAK1, AASS, ABCA1, ABCC4, ABCD3, ABI1, ABL2, ACACA, ACD, ACOT13, ACSL3, ACTB, ACTC1, ACTG1, ACTR1A, ACTR6, ACVR1B, ADAM10, ADAMTS3, ADAMTS7, ADCY3, ADCY6, ADD1, ADIPOR1, ADNP, AEBP2, AGFG1, AGO3, AGRN, AHI1, AK7, AKAP6, AKR1B1, AKT2, AKT3, AKTIP, ALDH5A1, AMFR, ANAPC1, ANAPC15, ANAPC5, ANK3, ANLN, ANOS1, ANP32E, ANTXR1, AP1G1, AP1S1, AP3B1, AP3D1, AP4M1, APBB1, APEX1, APLP2, APOO, APP, APP…
GO:0006996	organelle organization	GO_BiologicalProcess-GOA_09.02.2016_16h18	1.2e-45	8.3e-43	6.1e-48	3.4e-46	[3]	Group47	27.0284	1036	[AAAS, ABCA1, ABCC4, ABCD3, ABI1, ABL2, ACD, ACTB, ACTC1, ACTG1, ACTR1A, ACTR6, ADAMTS7, ADCY3, ADD1, AEBP2, AGFG1, AHI1, AK7, AKT2, AKT3, AKTIP, ANAPC1, ANAPC15, ANAPC5, ANK3, ANLN, ANP32E, ANTXR1, AP1G1, AP3B1, AP3D1, APBB1, APEX1, APOO, ARCN1, ARF1, ARFGAP1, ARFGAP3, ARFGEF1, ARFGEF2, ARFIP2, ARHGAP21, ARHGEF11, ARID1A, ARID4A, ARID5B, ARIH2, ARL2, ARL3, ARL8A, ARPC4, ARPIN, ARPP19, ARSB, ASCC…
GO:1902589	single-organism organelle organization	GO_BiologicalProcess-GOA_09.02.2016_16h18	1.6e-27	1e-24	6.1e-48	3.4e-46	[3, 4]	Group47	26.5043	740	[ABCC4, ABI1, ABL2, ACD, ACTC1, ACTG1, ADAMTS7, ADCY3, ADD1, AGFG1, AHI1, AK7, AKT2, ANAPC1, ANAPC15, ANAPC5, ANK3, ANLN, ANTXR1, APBB1, APEX1, APOO, ARCN1, ARF1, ARFGAP1, ARFGAP3, ARFGEF1, ARFIP2, ARHGEF11, ARID1A, ARID4A, ARL2, ARL3, ARL8A, ARPC4, ARPIN, ARPP19, ASPM, ASXL1, ATCAY, ATF2, ATF5, ATG2A, ATG2B, ATG4B, ATG4D, ATP2C1, ATR, AURKA, AURKB, B9D1, BAIAP2, BAIAP2L1, BAZ2A, BBC3, BBIP1, BBS…
GO:0007186	G-protein coupled receptor signaling pathway	GO_BiologicalProcess-GOA_09.02.2016_16h18	3.4e-31	2.3e-28	3.4e-31	1.8e-29	[4, 5]	Group48	7.95199	106	[ABCA1, ADCY3, ADCY6, ADCY9, ADGRA3, ADGRV1, ADIPOR1, ADM2, ADRBK1, AGRN, AKAP12, APLP2, ARHGEF11, ARPP19, ARRDC3, BAIAP3, BUD31, C5, CA2, CAMKMT, CCDC6, CDK5R1, CELSR1, CELSR2, CELSR3, CENPI, CHRM3, CNGB1, CNTN2, CPAMD8, CPE, CRY1, CXCL12, DGKZ, DNM1, DNM2, DRD4, DYNLT1, ECE1, ECEL1, EZR, F2R, FLNA, FZD2, FZD3, FZD4, FZD5, FZD7, GIT2, GNAL, GNAO1, GNG4, GNG7, GPR153, GPR157, GPR161, GPR173, GPR1…
GO:0060322	head development	GO_BiologicalProcess-GOA_09.02.2016_16h18	2.3e-09	1.3e-06	2.2e-13	1e-11	[3]	Group49	27.1951	223	[AARS, ABL2, ACSL3, ACTB, AHI1, AK2, AK7, ANKRD11, APEX1, APLP2, APP, ARCN1, ARHGAP11B, ARID1A, ARID5B, ARNT2, ASCL1, ASPM, ATF5, ATRN, ATXN2, BAG3, BBS7, BCL2, BCR, BMP2, BOK, BRAF, BRCA1, BRCA2, BTG2, BUD31, C2CD3, CAST, CCDC14, CCDC85C, CDH2, CDK5R1, CDK5R2, CDK5RAP2, CELSR2, CENPF, CLN5, CLP1, CNP, CNTN2, COL1A1, COL4A1, CRISPLD1, CSRNP1, CST3, CTNNA2, CTNS, CXCL12, DCLK1, DDIT4, DFNB31, DLL1…
GO:0007399	nervous system development	GO_BiologicalProcess-GOA_09.02.2016_16h18	5e-13	3e-10	2.2e-13	1e-11	[4, 5]	Group49	24.1797	619	[AARS, ABL2, ACD, ACSL3, ACTB, ACTG1, ACVR1B, ADAM10, ADCY6, ADGRV1, ADNP, AGRN, AHI1, AK2, AK7, AKT2, ALDH5A1, ANK3, ANOS1, APBA2, APBB1, APCDD1, APEX1, APLP2, APP, ARCN1, ARF1, ARFGEF1, ARHGAP11B, ARHGAP39, ARHGEF1, ARHGEF11, ARID1A, ARL3, ARNT2, ARPC4, ARSB, ASCL1, ASPM, ASTN1, ATCAY, ATF5, ATRN, ATXN2, AURKA, BAG3, BAIAP2, BBS7, BCL2, BCL6, BCR, BEX1, BLOC1S1, BLOC1S2, BMP2, BMP7, BNIP2, BOK,…
GO:0007417	central nervous system development	GO_BiologicalProcess-GOA_09.02.2016_16h18	6.9e-09	3.9e-06	2.2e-13	1e-11	[4, 5, 6]	Group49	26.0274	266	[AARS, ABL2, ACD, ACSL3, ACTB, ACVR1B, AHI1, AK2, AK7, ALDH5A1, APEX1, APLP2, APP, ARCN1, ARHGAP11B, ARID1A, ARNT2, ARSB, ASCL1, ASPM, ATF5, ATRN, ATXN2, BAG3, BBS7, BCL2, BCR, BMP2, BOK, BRCA1, BRCA2, BTG2, BUD31, C2CD3, CAST, CCDC14, CCDC85C, CDH11, CDH2, CDK5R1, CDK5R2, CDK5RAP2, CDKN2C, CELSR1, CELSR2, CENPF, CITED2, CLN5, CLP1, CNP, CNTN2, COL2A1, COL4A1, COX7B, CST3, CTNNA2, CTNS, CXCL12, D…
GO:0007420	brain development	GO_BiologicalProcess-GOA_09.02.2016_16h18	2.8e-09	1.6e-06	2.2e-13	1e-11	[3, 4, 5, 6, 7]	Group49	27.4131	213	[AARS, ABL2, ACSL3, ACTB, AHI1, AK2, AK7, APEX1, APLP2, APP, ARCN1, ARHGAP11B, ARID1A, ARNT2, ASCL1, ASPM, ATF5, ATRN, ATXN2, BAG3, BBS7, BCL2, BCR, BMP2, BOK, BRCA1, BRCA2, BTG2, BUD31, C2CD3, CAST, CCDC14, CCDC85C, CDH2, CDK5R1, CDK5R2, CDK5RAP2, CELSR2, CENPF, CLN5, CLP1, CNP, CNTN2, COL4A1, CST3, CTNNA2, CTNS, CXCL12, DCLK1, DDIT4, DFNB31, DLL1, DMRTA2, DRAXIN, DYNLL1, E2F1, EFHC1, EGR2, EOME…
GO:0030900	forebrain development	GO_BiologicalProcess-GOA_09.02.2016_16h18	1.9e-07	0.0001	2.2e-13	1e-11	[3, 4, 5, 6, 7, 8]	Group49	29.2162	123	[APEX1, APLP2, APP, ARHGAP11B, ARID1A, ASCL1, ASPM, ATF5, BMP2, BTG2, BUD31, CCDC85C, CDH2, CDK5R1, CDK5R2, CNP, CNTN2, CXCL12, DCLK1, DMRTA2, DRAXIN, DYNLL1, E2F1, EFHC1, EOMES, EPHB2, EZH1, FABP7, FAS, FAT4, FEZF1, FGFR1, FGFR3, FLNB, FOXB1, GART, GLI3, GNAO1, GSK3B, H2AFX, HMGA2, HNRNPK, HOOK3, HTT, ID2, IGF2BP1, KALRN, KAT2A, KDM2B, KDM6B, LRP1, LRP2, MBD1, MDK, MLLT4, MYH10, NCOR1, NDE1, NDE…
GO:0021537	telencephalon development	GO_BiologicalProcess-GOA_09.02.2016_16h18	2.7e-05	0.012	2.2e-13	1e-11	[3, 4, 5, 6, 7, 8, 9]	Group49	29.368	79	[ARHGAP11B, ASCL1, ASPM, ATF5, BMP2, BTG2, BUD31, CCDC85C, CDH2, CDK5R1, CDK5R2, CNTN2, CXCL12, DMRTA2, EFHC1, EOMES, EPHB2, EZH1, FAS, FAT4, FEZF1, FGFR1, FLNB, FOXB1, GART, GLI3, GSK3B, H2AFX, HNRNPK, HTT, ID2, IGF2BP1, KAT2A, KDM2B, KDM6B, LRP1, MDK, MLLT4, MYH10, NDE1, NDEL1, NEFH, NEFL, NELL2, NF1, NME1, NR2E1, NR2F1, NR2F2, NR4A3, NRP2, NTRK2, PAFAH1B1, PAX6, POU3F2, POU3F3, PPP1R9B, PTPRS,…
GO:0021543	pallium development	GO_BiologicalProcess-GOA_09.02.2016_16h18	9e-06	0.0042	2.2e-13	1e-11	[3, 4, 5, 6, 7, 8, 9, 10]	Group49	32.5967	59	[ARHGAP11B, ASCL1, ASPM, BTG2, CCDC85C, CDH2, CDK5R1, CDK5R2, DMRTA2, EFHC1, EOMES, EZH1, FAT4, FGFR1, FLNB, GART, GLI3, GSK3B, H2AFX, HNRNPK, IGF2BP1, KDM6B, LRP1, MDK, MLLT4, NDE1, NDEL1, NEFH, NEFL, NELL2, NF1, NME1, NR2E1, NR2F1, NR2F2, NR4A3, NRP2, NTRK2, PAFAH1B1, PAX6, POU3F2, POU3F3, PPP1R9B, PTPRS, PTPRZ1, RELN, RTN4, SLC38A2, SMO, SMOX, SOCS7, SOX2, SRGAP2, TACC3, TRA2B, USP9X, VLDLR, W…
GO:0021987	cerebral cortex development	GO_BiologicalProcess-GOA_09.02.2016_16h18	1.6e-07	8.8e-05	2.2e-13	1e-11	[3, 4, 5, 6, 7, 8, 9, 10, 11]	Group49	38.7597	50	[ARHGAP11B, ASCL1, ASPM, CCDC85C, CDH2, CDK5R1, CDK5R2, DMRTA2, EFHC1, EOMES, FAT4, FGFR1, GART, GLI3, GSK3B, H2AFX, HNRNPK, LRP1, MDK, MLLT4, NDE1, NDEL1, NEFH, NEFL, NELL2, NF1, NR2E1, NR2F1, NR2F2, NRP2, NTRK2, PAFAH1B1, PAX6, POU3F2, POU3F3, PPP1R9B, PTPRS, RELN, RTN4, SLC38A2, SMO, SMOX, SOCS7, SOX2, SRGAP2, TACC3, TRA2B, VLDLR, WDR62, XAB2]
GO:0035966	response to topologically incorrect protein	GO_BiologicalProcess-GOA_09.02.2016_16h18	6.6e-12	3.9e-09	4.4e-13	1.9e-11	[3, 4]	Group5	40.7609	75	[AARS, ACD, ADD1, AMFR, ARFGAP1, ARFGAP3, ASNS, ATF3, ATF6B, BBC3, CALR, CCND1, CHAC1, CREB3L1, CREB3L2, CREBRF, CTDSP2, CTH, DDIT3, DDX11, DERL2, DNAJB11, DNAJB2, DNAJB9, DNAJC3, EDEM1, EIF2AK3, EP300, ERN1, EXTL3, GFPT1, GOSR2, HDGF, HERPUD1, HSP90B1, HSPA4, HSPA5, HSPA8, HSPE1, HSPH1, HYOU1, LMNA, MYDGF, NFE2L2, PARP16, POMT2, PPP1R15A, PPP1R15B, PPP2R5B, PREB, RNF126, RNF175, SDF2L1, SEC31A, …
GO:0034976	response to endoplasmic reticulum stress	GO_BiologicalProcess-GOA_09.02.2016_16h18	8.6e-14	5.3e-11	4.4e-13	1.9e-11	[4]	Group5	38.3459	102	[AARS, ACD, ADD1, AMFR, ARFGAP1, ARFGAP3, ASNS, ATF3, ATF6B, ATP2A2, AUP1, BBC3, BCL2, CALR, CCND1, CEBPB, CHAC1, CREB3L1, CREB3L2, CREBRF, CTDSP2, CTH, DDIT3, DDRGK1, DDX11, DERL2, DNAJB11, DNAJB2, DNAJB9, DNAJC10, DNAJC3, EDEM1, EIF2AK3, EP300, ERLIN1, ERLIN2, ERN1, ERP29, EXTL3, FAM129A, FLOT1, FOXRED2, GFPT1, GOSR2, GSK3B, HDGF, HERPUD1, HM13, HSP90B1, HSPA5, HYOU1, JUN, LMNA, MYDGF, NFE2L2, …
GO:0035967	cellular response to topologically incorrect protein	GO_BiologicalProcess-GOA_09.02.2016_16h18	7.3e-13	4.5e-10	4.4e-13	1.9e-11	[4, 5]	Group5	44.8276	65	[AARS, ACD, ADD1, AMFR, ARFGAP1, ARFGAP3, ASNS, ATF3, ATF6B, BBC3, CALR, CCND1, CREB3L1, CREB3L2, CREBRF, CTDSP2, CTH, DDIT3, DDX11, DERL2, DNAJB11, DNAJB9, DNAJC3, EDEM1, EIF2AK3, EP300, ERN1, EXTL3, GFPT1, GOSR2, HDGF, HERPUD1, HSP90B1, HSPA5, HYOU1, LMNA, MYDGF, NFE2L2, PARP16, POMT2, PPP1R15A, PPP1R15B, PPP2R5B, PREB, RNF126, RNF175, SDF2L1, SEC31A, SEC61A1, SEC61B, SEC62, SEC63, SRPRA, SRPRB…
GO:0030968	endoplasmic reticulum unfolded protein response	GO_BiologicalProcess-GOA_09.02.2016_16h18	1e-14	6.6e-12	4.4e-13	1.9e-11	[4, 5, 6, 7]	Group5	48.4848	64	[AARS, ACD, ADD1, AMFR, ARFGAP1, ARFGAP3, ASNS, ATF3, ATF6B, BBC3, CALR, CCND1, CREB3L1, CREB3L2, CREBRF, CTDSP2, CTH, DDIT3, DDX11, DERL2, DNAJB11, DNAJB9, DNAJC3, EDEM1, EIF2AK3, EP300, ERN1, EXTL3, GFPT1, GOSR2, HDGF, HERPUD1, HSP90B1, HSPA5, HYOU1, LMNA, MYDGF, NFE2L2, PARP16, POMT2, PPP1R15A, PPP1R15B, PPP2R5B, PREB, RNF175, SDF2L1, SEC31A, SEC61A1, SEC61B, SEC62, SEC63, SRPRA, SRPRB, SSR1, …
GO:0007623	circadian rhythm	GO_BiologicalProcess-GOA_09.02.2016_16h18	3.4e-05	0.015	3.4e-05	0.00013	[2]	Group50	30.2222	68	[AHCY, ATF5, BHLHE40, BHLHE41, CCAR2, CPT1A, CRTC1, CRY1, CRY2, CSNK1E, CST3, DRD4, DYRK1A, EGR3, EP300, FAS, GFPT1, GSK3B, HDAC1, HDAC2, HNRNPD, HNRNPR, HNRNPU, HSD17B4, ID2, JUN, KLF10, KMT2A, MAGEL2, MAPK10, MAPK8, MAPK9, NAGLU, NAMPT, NCOR1, NFE2L2, NFIL3, NGFR, NOCT, NR1D1, NR1D2, NR2F6, NTRK2, OGT, PER1, PER2, PPARGC1A, PRKDC, PSPC1, RBM4, RBM4B, RELB, ROCK2, RORA, SFPQ, SIK1, SIX3, SLC9A3,…
GO:0009628	response to abiotic stimulus	GO_BiologicalProcess-GOA_09.02.2016_16h18	1.9e-07	9.9e-05	1.9e-07	5.3e-06	[2]	Group51	24.5008	319	[AAAS, ABHD12, ABL2, AEN, AGRN, AHCY, AKR1B1, AKT2, ALKBH5, ANTXR1, APP, AQP7, ARID4A, ARNT2, ARSB, ASCL1, ASIC1, ASNS, ATF2, ATR, AURKB, BAG3, BBC3, BCL2, BHLHE40, BMP2, BMP7, BNIP3, BRAF, BRAT1, BRCA1, BRCA2, BRD1, BRIP1, BTG2, BUD31, CA2, CACNA1C, CAMK2D, CAMKMT, CAPN2, CBLB, CCAR2, CCDC66, CCNB1, CCND1, CDK2, CDKN1A, CDKN1B, CHORDC1, CHP1, CHRNA7, CIRBP, CITED2, CLCN6, CNGB1, COL11A1, COL18A1…
GO:0009314	response to radiation	GO_BiologicalProcess-GOA_09.02.2016_16h18	5.3e-05	0.023	1.9e-07	5.3e-06	[3]	Group51	25.7658	143	[ABL2, AEN, AGRN, ANTXR1, APP, ARID4A, ASNS, ATR, AURKB, BCL2, BHLHE40, BRAF, BRAT1, BRCA1, BRCA2, CACNA1C, CAMKMT, CCAR2, CCDC66, CCND1, CDKN1A, CIRBP, CNGB1, CRTC1, CRY1, CRY2, CTNS, CXCL12, DDB2, DEPDC1B, DNM2, DNMT3A, DRD4, DTL, DUSP1, E2F1, EGR1, EP300, ERCC1, ERCC2, FANCD2, FBXW7, FEN1, FLNB, FOS, FOXB1, GADD45A, GPC1, GPC2, GPC3, GPC4, GRIN2A, GTF2H2, GTF2H5, H2AFX, HMGA2, HMGCR, HMGCS1, H…
GO:0009790	embryo development	GO_BiologicalProcess-GOA_09.02.2016_16h18	7.8e-07	0.00038	7.8e-07	1.7e-05	[3, 4]	Group52	24.747	269	[ABI1, ACD, ACVR1, ACVR1B, ACVR2B, ADAM10, ADD1, AFF3, AHI1, AKIRIN2, AKR1B1, ANKRD11, APBA2, ARID1A, ARNT2, B9D1, BBS7, BCR, BIRC6, BMP2, BMP7, BNIP2, BRCA1, BRCA2, BRD4, BRK1, C2CD3, C5, CAPN2, CCDC40, CCNB1, CCNB2, CDK1, CDK5R1, CEBPB, CECR2, CELF1, CELSR1, CENPU, CITED2, CLASP2, CNOT3, COL11A1, COL1A1, COL2A1, COL4A2, COL5A1, COQ7, CRB2, CUL3, CYP26B1, CYR61, DACT1, DAG1, DDIT3, DLG1, DLK1, D…
GO:0009987	cellular process	GO_BiologicalProcess-GOA_09.02.2016_16h18	3.4e-11	2e-08	3.4e-11	1.3e-09	[1]	Group53	19.4902	3005	[AAAS, AAK1, AARS, AASS, ABCA1, ABCC4, ABCC5, ABCD3, ABCD4, ABHD12, ABHD3, ABHD4, ABHD5, ABI1, ABL2, ABTB2, ACACA, ACAD11, ACAD8, ACD, ACER3, ACOT13, ACP1, ACSL3, ACTA2, ACTB, ACTC1, ACTG1, ACTR1A, ACTR6, ACVR1, ACVR1B, ACVR2B, ACYP1, ADAM10, ADAM11, ADAM12, ADAMTS12, ADAMTS18, ADAMTS3, ADAMTS7, ADAMTS9, ADCY3, ADCY6, ADCY9, ADD1, ADGRA3, ADGRV1, ADH5, ADIPOR1, ADM2, ADNP, ADPGK, ADRBK1, AEBP2, A…
GO:0048518	positive regulation of biological process	GO_BiologicalProcess-GOA_09.02.2016_16h18	1.9e-14	1.2e-11	4.7e-21	2.3e-19	[1, 2, 3]	Group54	22.1257	1274	[AAK1, ABCA1, ABHD5, ABI1, ABL2, ACACA, ACD, ACER3, ACSL3, ACTA2, ACTB, ACTC1, ACTG1, ACVR1, ACVR1B, ACVR2B, ADAM10, ADAMTS3, ADCY3, ADCY6, ADCY9, ADIPOR1, ADM2, ADNP, ADRBK1, AGAP6, AGFG1, AGRN, AHI1, AHSA2, AKAP12, AKAP6, AKIRIN2, AKR1B1, AKT2, AKTIP, ALDH1A1, ANAPC1, ANAPC15, ANAPC5, ANK3, ANTXR1, AP1G1, AP3B1, AP3D1, APBB1, APEX1, APP, ARF1, ARFGAP1, ARFGAP3, ARFGEF1, ARFGEF2, ARFGEF3, ARFIP2…
GO:0065009	regulation of molecular function	GO_BiologicalProcess-GOA_09.02.2016_16h18	2e-09	1.1e-06	4.7e-21	2.3e-19	[2]	Group54	22.8648	680	[ABHD5, ABI1, ABL2, ACD, ACVR2B, ADCY3, ADCY6, ADCY9, ADD1, ADNP, ADRBK1, AGAP6, AGFG1, AGRN, AHSA2, AKAP6, AKIRIN2, AKR1B1, AKT2, AKTIP, ALDH1A1, AMFR, ANAPC1, ANAPC15, ANAPC5, ANK3, ANOS1, ANP32E, ANTXR1, APEX1, APLP2, APP, ARF1, ARFGAP1, ARFGAP3, ARFGEF1, ARFGEF2, ARFGEF3, ARHGAP11A, ARHGAP17, ARHGAP21, ARHGAP23, ARHGAP33, ARHGAP5, ARHGEF1, ARHGEF11, ARHGEF39, ARHGEF6, ARID5B, ARL2, ARPP19, AR…
GO:0019222	regulation of metabolic process	GO_BiologicalProcess-GOA_09.02.2016_16h18	3.8e-25	2.5e-22	4.7e-21	2.3e-19	[2, 3]	Group54	22.6519	1570	[AAAS, AARS, ABCA1, ABHD5, ABI1, ABL2, ACACA, ACAD8, ACD, ACSL3, ACTA2, ACTB, ACTC1, ACVR1, ACVR1B, ACVR2B, ADCY3, ADCY6, ADCY9, ADIPOR1, ADM2, ADNP, ADRBK1, AEBP2, AFF3, AFF4, AGAP6, AGFG1, AGO3, AGRN, AHI1, AHSA2, AKAP1, AKAP12, AKAP17A, AKAP6, AKIRIN2, AKR1B1, AKT2, AKTIP, ALDH1A1, ALPK3, ANAPC1, ANAPC15, ANAPC5, ANK3, ANKRA2, ANOS1, ANP32A, ANP32E, ANTXR1, APBA2, APBB1, APEX1, APLP2, APP, ARF…
GO:0009893	positive regulation of metabolic process	GO_BiologicalProcess-GOA_09.02.2016_16h18	4.9e-17	3.1e-14	4.7e-21	2.3e-19	[2, 3, 4]	Group54	23.7023	895	[ABCA1, ABHD5, ABI1, ABL2, ACACA, ACD, ACSL3, ACTA2, ACTB, ACTC1, ACVR1, ACVR1B, ACVR2B, ADCY3, ADCY6, ADCY9, ADM2, ADNP, ADRBK1, AGAP6, AGFG1, AGRN, AHI1, AHSA2, AKAP12, AKAP6, AKIRIN2, AKR1B1, AKT2, AKTIP, ALDH1A1, ANAPC1, ANAPC15, ANAPC5, ANK3, ANTXR1, APBB1, APEX1, APP, ARF1, ARFGAP1, ARFGAP3, ARFGEF1, ARFGEF2, ARFGEF3, ARHGAP11A, ARHGAP17, ARHGAP21, ARHGAP23, ARHGAP33, ARHGAP5, ARHGEF1, ARHG…
GO:0044093	positive regulation of molecular function	GO_BiologicalProcess-GOA_09.02.2016_16h18	5.3e-08	2.8e-05	4.7e-21	2.3e-19	[3]	Group54	23.6002	451	[ABHD5, ABI1, ABL2, ACD, ACVR2B, ADCY3, ADCY6, ADCY9, ADD1, ADNP, ADRBK1, AGAP6, AGFG1, AGRN, AHSA2, AKAP6, AKIRIN2, AKR1B1, AKT2, AKTIP, ALDH1A1, AMFR, ANAPC1, ANAPC15, ANAPC5, ANK3, APEX1, APP, ARF1, ARFGAP1, ARFGAP3, ARFGEF1, ARFGEF2, ARFGEF3, ARHGAP11A, ARHGAP17, ARHGAP21, ARHGAP23, ARHGAP33, ARHGAP5, ARHGEF1, ARHGEF11, ARHGEF39, ARHGEF6, ARID5B, ARRDC3, ATF2, ATP1B3, ATRAID, AURKB, B3GAT3, B…
GO:0048522	positive regulation of cellular process	GO_BiologicalProcess-GOA_09.02.2016_16h18	6.5e-14	4e-11	4.7e-21	2.3e-19	[2, 3, 4]	Group54	22.4399	1111	[AAK1, ABCA1, ABHD5, ABI1, ABL2, ACACA, ACD, ACER3, ACSL3, ACVR1, ACVR1B, ACVR2B, ADAM10, ADAMTS3, ADCY3, ADCY6, ADCY9, ADIPOR1, ADNP, ADRBK1, AGRN, AHI1, AKAP12, AKAP6, AKIRIN2, AKR1B1, AKT2, AKTIP, ANAPC1, ANAPC15, ANAPC5, ANK3, ANTXR1, AP1G1, AP3B1, AP3D1, APBB1, APEX1, APP, ARF1, ARFGEF1, ARFIP2, ARHGAP5, ARHGEF11, ARHGEF39, ARHGEF6, ARID1A, ARID3B, ARID4A, ARID5B, ARIH1, ARIH2, ARL2, ARMCX3,…
GO:0009889	regulation of biosynthetic process	GO_BiologicalProcess-GOA_09.02.2016_16h18	1.7e-16	1.1e-13	4.7e-21	2.3e-19	[3, 4]	Group54	23.1524	1015	[AARS, ABCA1, ACAD8, ACD, ACSL3, ACVR1, ACVR1B, ACVR2B, ADNP, AEBP2, AFF3, AFF4, AGO3, AGRN, AHI1, AKAP12, AKAP17A, AKAP6, AKIRIN2, AKR1B1, AKT2, ALPK3, ANKRA2, ANP32A, ANTXR1, APBB1, APEX1, APP, ARFGEF1, ARGLU1, ARHGEF11, ARID1A, ARID3B, ARID4A, ARID5B, ARMCX3, ARNT2, ARPP19, ASB1, ASCC3, ASCL1, ASF1B, ASXL1, ATAD2, ATF2, ATF3, ATF5, ATF6B, ATF7IP2, ATR, ATXN1L, ATXN2, AURKB, BACH2, BAHCC1, BAMB…
GO:0031323	regulation of cellular metabolic process	GO_BiologicalProcess-GOA_09.02.2016_16h18	3.8e-22	2.5e-19	4.7e-21	2.3e-19	[3, 4]	Group54	22.82	1387	[AARS, ABCA1, ABHD5, ABI1, ABL2, ACACA, ACAD8, ACD, ACSL3, ACVR1, ACVR1B, ACVR2B, ADCY3, ADCY6, ADCY9, ADIPOR1, ADNP, AEBP2, AFF3, AFF4, AGO3, AGRN, AHI1, AKAP1, AKAP12, AKAP17A, AKAP6, AKIRIN2, AKR1B1, AKT2, AKTIP, ALPK3, ANAPC1, ANAPC15, ANAPC5, ANKRA2, ANOS1, ANP32A, ANTXR1, APBB1, APEX1, APLP2, APP, ARF1, ARFGEF1, ARFGEF3, ARGLU1, ARHGEF11, ARID1A, ARID3B, ARID4A, ARID5B, ARIH1, ARIH2, ARMCX3…
GO:0051171	regulation of nitrogen compound metabolic process	GO_BiologicalProcess-GOA_09.02.2016_16h18	4.4e-21	2.9e-18	4.7e-21	2.3e-19	[3, 4]	Group54	23.7365	1052	[AARS, ABCA1, ACAD8, ACD, ACSL3, ACVR1, ACVR1B, ACVR2B, ADNP, AEBP2, AFF3, AFF4, AGO3, AGRN, AHI1, AKAP12, AKAP17A, AKAP6, AKIRIN2, AKR1B1, AKT2, ALPK3, ANKRA2, ANP32A, ANTXR1, APBB1, APEX1, APP, ARGLU1, ARHGEF11, ARID1A, ARID3B, ARID4A, ARID5B, ARMCX3, ARNT2, ASCC3, ASCL1, ASF1B, ASXL1, ATAD2, ATCAY, ATF2, ATF3, ATF5, ATF6B, ATF7IP2, ATR, ATXN1L, ATXN2, AURKB, BACH2, BAHCC1, BAMBI, BAZ2A, BBS7, …
GO:0060255	regulation of macromolecule metabolic process	GO_BiologicalProcess-GOA_09.02.2016_16h18	3e-24	2e-21	4.7e-21	2.3e-19	[3, 4]	Group54	23.0577	1383	[AAAS, AARS, ABI1, ABL2, ACAD8, ACD, ACTA2, ACTB, ACTC1, ACVR1, ACVR1B, ACVR2B, ADCY3, ADCY6, ADCY9, ADM2, ADNP, AEBP2, AFF3, AFF4, AGO3, AGRN, AHI1, AKAP1, AKAP17A, AKAP6, AKIRIN2, AKR1B1, AKT2, AKTIP, ALPK3, ANAPC1, ANAPC15, ANAPC5, ANK3, ANKRA2, ANOS1, ANP32A, ANTXR1, APBA2, APBB1, APEX1, APLP2, APP, ARF1, ARFGEF1, ARFGEF3, ARGLU1, ARHGEF11, ARID1A, ARID3B, ARID4A, ARID5B, ARIH1, ARIH2, ARMCX3…
GO:0080090	regulation of primary metabolic process	GO_BiologicalProcess-GOA_09.02.2016_16h18	6.4e-22	4.2e-19	4.7e-21	2.3e-19	[3, 4]	Group54	22.8395	1369	[AARS, ABCA1, ABHD5, ABI1, ABL2, ACAD8, ACD, ACSL3, ACVR1, ACVR1B, ACVR2B, ADCY3, ADCY6, ADCY9, ADIPOR1, ADNP, AEBP2, AFF3, AFF4, AGO3, AGRN, AHI1, AKAP1, AKAP12, AKAP17A, AKAP6, AKIRIN2, AKR1B1, AKT2, AKTIP, ALPK3, ANAPC1, ANAPC15, ANAPC5, ANKRA2, ANOS1, ANP32A, ANTXR1, APBB1, APEX1, APLP2, APP, ARF1, ARFGEF1, ARFGEF3, ARGLU1, ARHGEF11, ARID1A, ARID3B, ARID4A, ARID5B, ARIH1, ARIH2, ARMCX3, ARNT2…
GO:0009891	positive regulation of biosynthetic process	GO_BiologicalProcess-GOA_09.02.2016_16h18	8e-07	0.00039	4.7e-21	2.3e-19	[3, 4, 5]	Group54	23.1086	449	[ABCA1, ACD, ACSL3, ACVR1, ACVR1B, ADNP, AGRN, AHI1, AKAP12, AKIRIN2, AKR1B1, AKT2, ANTXR1, APBB1, APP, ARFGEF1, ARHGEF11, ARID1A, ARID3B, ARID4A, ARID5B, ARMCX3, ARNT2, ARPP19, ASCL1, ASXL1, ATAD2, ATF2, ATF3, ATF5, ATF6B, ATR, AURKB, BAMBI, BCL9L, BCLAF1, BEX1, BLOC1S2, BMP2, BMP7, BRCA1, BRCA2, BRD1, BRD4, BRD7, BRIP1, BUD31, CALCOCO1, CALR, CAMK1D, CAMTA1, CCNL1, CCNL2, CCNT1, CCNT2, CCPG1, C…
GO:0010604	positive regulation of macromolecule metabolic process	GO_BiologicalProcess-GOA_09.02.2016_16h18	1e-15	6.4e-13	4.7e-21	2.3e-19	[3, 4, 5]	Group54	24.1697	735	[ABI1, ABL2, ACD, ACTA2, ACTB, ACTC1, ACVR1, ACVR1B, ACVR2B, ADCY3, ADCY6, ADCY9, ADM2, ADNP, AGRN, AHI1, AKAP6, AKIRIN2, AKR1B1, AKT2, AKTIP, ANAPC1, ANAPC15, ANAPC5, ANK3, ANTXR1, APBB1, APEX1, APP, ARFGEF1, ARHGEF11, ARID1A, ARID3B, ARID4A, ARID5B, ARIH1, ARIH2, ARMCX3, ARNT2, ARRDC3, ASCL1, ASXL1, ATAD1, ATAD2, ATF2, ATF3, ATF5, ATF6B, ATG4B, ATP6AP1, ATR, ATRAID, AURKA, AURKB, BAMBI, BBC3, B…
GO:0031325	positive regulation of cellular metabolic process	GO_BiologicalProcess-GOA_09.02.2016_16h18	2.7e-12	1.6e-09	4.7e-21	2.3e-19	[3, 4, 5]	Group54	23.4472	721	[ABCA1, ABHD5, ABI1, ABL2, ACACA, ACD, ACSL3, ACVR1, ACVR1B, ACVR2B, ADCY3, ADCY6, ADCY9, ADNP, AGRN, AHI1, AKAP12, AKAP6, AKIRIN2, AKR1B1, AKT2, AKTIP, ANAPC1, ANAPC15, ANAPC5, ANTXR1, APBB1, APEX1, APP, ARFGEF1, ARHGEF11, ARID1A, ARID3B, ARID4A, ARID5B, ARIH1, ARIH2, ARMCX3, ARNT2, ARPP19, ARRDC3, ASCL1, ASXL1, ATAD1, ATAD2, ATF2, ATF3, ATF5, ATF6B, ATP6AP1, ATR, ATRAID, AURKA, AURKB, BAMBI, BB…
GO:0043085	positive regulation of catalytic activity	GO_BiologicalProcess-GOA_09.02.2016_16h18	3e-05	0.013	4.7e-21	2.3e-19	[3, 4, 5]	Group54	22.8167	371	[ABHD5, ABI1, ABL2, ACD, ACVR2B, ADCY3, ADCY6, ADCY9, ADNP, ADRBK1, AGAP6, AGFG1, AGRN, AHSA2, AKAP6, AKIRIN2, AKT2, ALDH1A1, ANAPC1, ANAPC15, ANAPC5, APP, ARF1, ARFGAP1, ARFGAP3, ARFGEF1, ARFGEF2, ARFGEF3, ARHGAP11A, ARHGAP17, ARHGAP21, ARHGAP23, ARHGAP33, ARHGAP5, ARHGEF1, ARHGEF11, ARHGEF39, ARHGEF6, ARRDC3, ATP1B3, ATRAID, AURKB, B3GAT3, BBC3, BCL2, BCL2L13, BCR, BMP2, BNIP2, BOK, BRAF, BRD8,…
GO:0051173	positive regulation of nitrogen compound metabolic process	GO_BiologicalProcess-GOA_09.02.2016_16h18	9.6e-10	5.5e-07	4.7e-21	2.3e-19	[3, 4, 5]	Group54	24.1919	464	[ABCA1, ACD, ACSL3, ACVR1, ACVR1B, ADNP, AGRN, AHI1, AKAP12, AKIRIN2, AKR1B1, AKT2, ANTXR1, APBB1, APEX1, APP, ARHGEF11, ARID1A, ARID3B, ARID4A, ARID5B, ARMCX3, ARNT2, ASCL1, ASXL1, ATAD2, ATF2, ATF3, ATF5, ATF6B, ATR, AURKB, BAMBI, BCL9L, BCLAF1, BEX1, BLOC1S2, BMP2, BMP7, BRCA1, BRCA2, BRD1, BRD4, BRD7, BRIP1, BTG2, BUD31, CALCOCO1, CALR, CAMK1D, CAMTA1, CCNB1, CCNL1, CCNL2, CCNT1, CCNT2, CCPG1…
GO:0010468	regulation of gene expression	GO_BiologicalProcess-GOA_09.02.2016_16h18	5.4e-21	3.5e-18	4.7e-21	2.3e-19	[4, 5]	Group54	23.7489	1044	[AAAS, AARS, ACAD8, ACTA2, ACTB, ACTC1, ACVR1, ACVR1B, ACVR2B, ADM2, ADNP, AEBP2, AFF3, AFF4, AGO3, AGRN, AHI1, AKAP17A, AKIRIN2, AKR1B1, AKT2, ALPK3, ANK3, ANKRA2, ANP32A, APBA2, APBB1, APEX1, APP, ARGLU1, ARHGEF11, ARID1A, ARID3B, ARID4A, ARID5B, ARMCX3, ARNT2, ASCC3, ASCL1, ASF1B, ASXL1, ATAD2, ATF2, ATF3, ATF5, ATF6B, ATF7IP2, ATRAID, ATXN1L, ATXN2, AURKB, BACH2, BAHCC1, BAMBI, BAZ2A, BBS7, B…
GO:0010556	regulation of macromolecule biosynthetic process	GO_BiologicalProcess-GOA_09.02.2016_16h18	2.4e-19	1.5e-16	4.7e-21	2.3e-19	[4, 5]	Group54	23.7325	983	[AARS, ACAD8, ACD, ACVR1, ACVR1B, ACVR2B, ADNP, AEBP2, AFF3, AFF4, AGO3, AGRN, AHI1, AKAP17A, AKIRIN2, AKR1B1, AKT2, ALPK3, ANKRA2, ANP32A, ANTXR1, APBB1, APEX1, APP, ARFGEF1, ARGLU1, ARHGEF11, ARID1A, ARID3B, ARID4A, ARID5B, ARMCX3, ARNT2, ASB1, ASCC3, ASCL1, ASF1B, ASXL1, ATAD2, ATF2, ATF3, ATF5, ATF6B, ATF7IP2, ATR, ATXN1L, ATXN2, AURKB, BACH2, BAHCC1, BAMBI, BAZ2A, BBS7, BCL2, BCL6, BCL7A, BC…
GO:0019219	regulation of nucleobase-containing compound metabolic process	GO_BiologicalProcess-GOA_09.02.2016_16h18	1.8e-19	1.1e-16	4.7e-21	2.3e-19	[4, 5]	Group54	23.7588	981	[ABCA1, ACAD8, ACD, ACVR1, ACVR1B, ACVR2B, ADNP, AEBP2, AFF3, AFF4, AGRN, AHI1, AKAP12, AKAP17A, AKAP6, AKIRIN2, AKR1B1, AKT2, ALPK3, ANKRA2, ANP32A, ANTXR1, APBB1, APEX1, APP, ARGLU1, ARHGEF11, ARID1A, ARID3B, ARID4A, ARID5B, ARMCX3, ARNT2, ASCC3, ASCL1, ASF1B, ASXL1, ATAD2, ATF2, ATF3, ATF5, ATF6B, ATF7IP2, ATR, ATXN1L, AURKB, BACH2, BAHCC1, BAMBI, BAZ2A, BBS7, BCL6, BCL7A, BCL9L, BCLAF1, BEND3…
GO:0031326	regulation of cellular biosynthetic process	GO_BiologicalProcess-GOA_09.02.2016_16h18	6.4e-17	4e-14	4.7e-21	2.3e-19	[4, 5]	Group54	23.2488	1009	[AARS, ABCA1, ACAD8, ACD, ACSL3, ACVR1, ACVR1B, ACVR2B, ADNP, AEBP2, AFF3, AFF4, AGO3, AGRN, AHI1, AKAP12, AKAP17A, AKAP6, AKIRIN2, AKR1B1, AKT2, ALPK3, ANKRA2, ANP32A, ANTXR1, APBB1, APEX1, APP, ARFGEF1, ARGLU1, ARHGEF11, ARID1A, ARID3B, ARID4A, ARID5B, ARMCX3, ARNT2, ARPP19, ASB1, ASCC3, ASCL1, ASF1B, ASXL1, ATAD2, ATF2, ATF3, ATF5, ATF6B, ATF7IP2, ATR, ATXN1L, ATXN2, AURKB, BACH2, BAHCC1, BAMB…
GO:0051246	regulation of protein metabolic process	GO_BiologicalProcess-GOA_09.02.2016_16h18	1.3e-12	7.9e-10	4.7e-21	2.3e-19	[4, 5]	Group54	23.8459	656	[AARS, ABI1, ABL2, ACVR1, ACVR1B, ACVR2B, ADCY3, ADCY6, ADCY9, ADNP, AGO3, AKAP1, AKAP6, AKIRIN2, AKR1B1, AKT2, AKTIP, ANAPC1, ANAPC15, ANAPC5, ANOS1, APBB1, APEX1, APLP2, APP, ARFGEF1, ARFGEF3, ARIH1, ARIH2, ARPP19, ARRDC3, ASB1, ATF3, ATG4B, ATP6AP1, ATRAID, ATXN2, AURKA, BBC3, BBS7, BCCIP, BCL2, BCL2L13, BCL6, BHLHE40, BIRC5, BIRC6, BMP2, BMP7, BNIP2, BOK, BRAF, BRAT1, BRCA1, BRD4, BRD7, BTG2,…
GO:0010557	positive regulation of macromolecule biosynthetic process	GO_BiologicalProcess-GOA_09.02.2016_16h18	2.2e-09	1.3e-06	4.7e-21	2.3e-19	[4, 5, 6]	Group54	24.2954	431	[ACD, ACVR1, ACVR1B, AGRN, AHI1, AKIRIN2, AKR1B1, AKT2, ANTXR1, APBB1, APP, ARFGEF1, ARHGEF11, ARID1A, ARID3B, ARID4A, ARID5B, ARMCX3, ARNT2, ASCL1, ASXL1, ATAD2, ATF2, ATF3, ATF5, ATF6B, ATR, AURKB, BAMBI, BCL9L, BCLAF1, BEX1, BLOC1S2, BMP2, BMP7, BRCA1, BRCA2, BRD1, BRD4, BRD7, BRIP1, BUD31, CALCOCO1, CALR, CAMK1D, CAMTA1, CCNL1, CCNL2, CCNT1, CCNT2, CCPG1, CCT5, CCT8, CD276, CDC7, CDK1, CDK2, …
GO:0010628	positive regulation of gene expression	GO_BiologicalProcess-GOA_09.02.2016_16h18	2.9e-11	1.7e-08	4.7e-21	2.3e-19	[4, 5, 6]	Group54	24.7711	460	[ACTA2, ACTB, ACTC1, ACVR1, ACVR1B, ADM2, AGRN, AHI1, AKIRIN2, AKR1B1, AKT2, ANK3, APBB1, APP, ARHGEF11, ARID1A, ARID3B, ARID4A, ARID5B, ARMCX3, ARNT2, ASCL1, ASXL1, ATAD2, ATF2, ATF3, ATF5, ATF6B, BAMBI, BCL9L, BCLAF1, BEX1, BLOC1S2, BMP2, BMP7, BRAF, BRCA1, BRCA2, BRD1, BRD4, BRD7, BRIP1, BTG2, BUD31, CALCOCO1, CALR, CAMK1D, CAMTA1, CCNB1, CCNL1, CCNL2, CCNT1, CCNT2, CCPG1, CD46, CDK1, CDK2, CD…
GO:0031328	positive regulation of cellular biosynthetic process	GO_BiologicalProcess-GOA_09.02.2016_16h18	2.5e-07	0.00013	4.7e-21	2.3e-19	[4, 5, 6]	Group54	23.3264	446	[ABCA1, ACD, ACSL3, ACVR1, ACVR1B, ADNP, AGRN, AHI1, AKAP12, AKIRIN2, AKR1B1, AKT2, ANTXR1, APBB1, APP, ARFGEF1, ARHGEF11, ARID1A, ARID3B, ARID4A, ARID5B, ARMCX3, ARNT2, ARPP19, ASCL1, ASXL1, ATAD2, ATF2, ATF3, ATF5, ATF6B, ATR, AURKB, BAMBI, BCL9L, BCLAF1, BEX1, BLOC1S2, BMP2, BMP7, BRCA1, BRCA2, BRD1, BRD4, BRD7, BRIP1, BUD31, CALCOCO1, CALR, CAMK1D, CAMTA1, CCNL1, CCNL2, CCNT1, CCNT2, CCPG1, C…
GO:0032268	regulation of cellular protein metabolic process	GO_BiologicalProcess-GOA_09.02.2016_16h18	4.6e-12	2.7e-09	4.7e-21	2.3e-19	[4, 5, 6]	Group54	23.936	613	[AARS, ABI1, ABL2, ACVR1, ACVR1B, ACVR2B, ADCY3, ADCY6, ADCY9, ADNP, AGO3, AKAP1, AKAP6, AKIRIN2, AKR1B1, AKT2, AKTIP, ANAPC1, ANAPC15, ANAPC5, ANOS1, APEX1, APLP2, APP, ARFGEF1, ARFGEF3, ARIH1, ARIH2, ARPP19, ARRDC3, ATF3, ATP6AP1, ATRAID, ATXN2, AURKA, BBC3, BBS7, BCCIP, BCL2, BCL2L13, BCL6, BHLHE40, BIRC5, BIRC6, BMP2, BMP7, BNIP2, BOK, BRAF, BRAT1, BRCA1, BRD4, BRD7, BTG2, BUB1, BUB1B, BUB3, …
GO:0045935	positive regulation of nucleobase-containing compound metabolic process	GO_BiologicalProcess-GOA_09.02.2016_16h18	4.1e-09	2.3e-06	4.7e-21	2.3e-19	[4, 5, 6]	Group54	24.1341	439	[ABCA1, ACD, ACVR1, ACVR1B, ADNP, AGRN, AHI1, AKAP12, AKIRIN2, AKR1B1, AKT2, ANTXR1, APBB1, APEX1, APP, ARHGEF11, ARID1A, ARID3B, ARID4A, ARID5B, ARMCX3, ARNT2, ASCL1, ASXL1, ATAD2, ATF2, ATF3, ATF5, ATF6B, ATR, AURKB, BAMBI, BCL9L, BCLAF1, BEX1, BLOC1S2, BMP2, BMP7, BRCA1, BRCA2, BRD1, BRD4, BRD7, BRIP1, BTG2, BUD31, CALCOCO1, CALR, CAMK1D, CAMTA1, CCNB1, CCNL1, CCNL2, CCNT1, CCNT2, CCPG1, CCT5,…
GO:0051247	positive regulation of protein metabolic process	GO_BiologicalProcess-GOA_09.02.2016_16h18	3.7e-05	0.016	4.7e-21	2.3e-19	[4, 5, 6]	Group54	22.7218	379	[ABI1, ABL2, ACVR1, ACVR1B, ACVR2B, ADCY3, ADCY6, ADCY9, ADNP, AKAP6, AKIRIN2, AKR1B1, AKT2, AKTIP, ANAPC1, ANAPC15, ANAPC5, APP, ARFGEF1, ARIH1, ARIH2, ARRDC3, ATG4B, ATP6AP1, ATRAID, AURKA, BBC3, BBS7, BCL2, BCL2L13, BCL6, BHLHE40, BMP2, BMP7, BNIP2, BOK, BRAF, BRAT1, BRCA1, BRD7, BUD31, C5, C6orf89, CAMK2D, CBLB, CCNB1, CCND1, CCND2, CCNL1, CCNL2, CCNT1, CCNT2, CCNY, CD276, CDC16, CDC20, CDC23…
GO:0032270	positive regulation of cellular protein metabolic process	GO_BiologicalProcess-GOA_09.02.2016_16h18	0.0001	0.044	4.7e-21	2.3e-19	[4, 5, 6, 7]	Group54	22.6282	353	[ABI1, ABL2, ACVR1, ACVR1B, ACVR2B, ADCY3, ADCY6, ADCY9, ADNP, AKAP6, AKIRIN2, AKR1B1, AKT2, AKTIP, ANAPC1, ANAPC15, ANAPC5, APP, ARFGEF1, ARIH1, ARIH2, ARRDC3, ATP6AP1, ATRAID, AURKA, BBC3, BBS7, BCL2, BCL2L13, BCL6, BHLHE40, BMP2, BMP7, BNIP2, BOK, BRAF, BRAT1, BRCA1, BRD7, BUD31, C5, C6orf89, CAMK2D, CCNB1, CCND1, CCND2, CCNL1, CCNL2, CCNT1, CCNT2, CCNY, CDC16, CDC20, CDC23, CDC6, CDH2, CDK1, …
GO:0051252	regulation of RNA metabolic process	GO_BiologicalProcess-GOA_09.02.2016_16h18	1.9e-18	1.2e-15	4.7e-21	2.3e-19	[4, 5, 6, 7]	Group54	23.9039	905	[ACAD8, ACVR1, ACVR1B, ACVR2B, ADNP, AEBP2, AFF3, AFF4, AGRN, AHI1, AKAP17A, AKIRIN2, AKR1B1, AKT2, ALPK3, ANKRA2, ANP32A, APBB1, APEX1, APP, ARGLU1, ARHGEF11, ARID1A, ARID3B, ARID4A, ARID5B, ARMCX3, ARNT2, ASCC3, ASCL1, ASF1B, ASXL1, ATAD2, ATF2, ATF3, ATF5, ATF6B, ATF7IP2, ATXN1L, AURKB, BACH2, BAHCC1, BAMBI, BAZ2A, BBS7, BCL6, BCL7A, BCL9L, BCLAF1, BEND3, BEX1, BHLHE40, BHLHE41, BIRC5, BLOC1S2…
GO:0051254	positive regulation of RNA metabolic process	GO_BiologicalProcess-GOA_09.02.2016_16h18	2.9e-09	1.6e-06	4.7e-21	2.3e-19	[4, 5, 6, 7, 8]	Group54	24.6077	392	[ACVR1, ACVR1B, AGRN, AHI1, AKIRIN2, AKR1B1, AKT2, APBB1, APP, ARHGEF11, ARID1A, ARID3B, ARID4A, ARID5B, ARMCX3, ARNT2, ASCL1, ASXL1, ATAD2, ATF2, ATF3, ATF5, ATF6B, BAMBI, BCL9L, BCLAF1, BEX1, BLOC1S2, BMP2, BMP7, BRCA1, BRCA2, BRD1, BRD4, BRD7, BRIP1, BTG2, BUD31, CALCOCO1, CAMK1D, CAMTA1, CCNB1, CCNL1, CCNL2, CCNT1, CCNT2, CCPG1, CDK2, CDK5RAP2, CDKN2AIP, CEBPB, CEBPG, CHD1, CHURC1, CITED2, CK…
GO:0001764	neuron migration	GO_BiologicalProcess-GOA_09.02.2016_16h18	8.1e-06	0.0038	8.1e-06	0.00012	[4, 5, 6, 7, 8]	Group55	33.758	53	[ASCL1, ASPM, ASTN1, CDK5R1, CDK5R2, CELSR1, CELSR2, CELSR3, CNTN2, CXCL12, DCLK1, DDIT4, DDX11, FAT3, FEZF1, FGFR1, FLRT2, FZD3, GAS6, GJA1, GPR173, GSK3B, MARK1, MBD1, MYH10, NAV1, NDE1, NDEL1, NELL2, NEUROD4, NEUROG2, NR2F1, NR2F2, NR4A2, NRCAM, NRP2, NTN1, NTRK2, OLIG3, PAFAH1B1, PAX6, PCM1, PTPRZ1, RAPGEF2, RELN, RIPK2, ROBO3, SCRT1, SEMA6A, SOX1, SRGAP2, STAT3, USP9X]
GO:0016458	gene silencing	GO_BiologicalProcess-GOA_09.02.2016_16h18	8.6e-06	0.004	8.6e-06	0.00012	[3, 5, 6, 7]	Group56	31.2217	69	[AAAS, AGO3, ARID1A, ATAD2, BAHCC1, BAZ2A, BEND3, CDC45, CDK2, CELF1, CLP1, CNOT1, CNOT3, DNMT3A, DOT1L, DROSHA, GARS, H2AFV, H2AFX, H2AFY, H2AFY2, H2AFZ, HAT1, HDAC2, HDAC5, HELLS, HEXIM1, HIST2H3A, HMGA1, HNRNPA2B1, IPO8, KMT2B, LIMD1, MBD1, MBD2, MBD3, MECP2, NCBP2, NDC1, NUP107, NUP205, NUP210, NUP54, NUP58, NUP62, PHF1, PLD6, POLR2A, POLR2H, POLR2L, POM121, RAN, RBM3, RBM4, SEH1L, SMAD2, SND…
GO:0040007	growth	GO_BiologicalProcess-GOA_09.02.2016_16h18	1.6e-07	8.5e-05	1.6e-07	4.7e-06	[1]	Group6	25.2117	268	[ACVR1B, ACVR2B, ADAM10, ADD1, ADIPOR1, ADNP, AGRN, AKAP6, AKR1B1, ANKRD11, APBA2, APBB1, APP, ARHGEF11, ARID5B, ARIH2, ASPM, ATF5, ATRN, ATXN2, AURKA, BBC3, BCL2, BCL6, BMP2, BMP7, BRAT1, BRCA2, BRD4, BRD8, CACNA1C, CAMK2D, CAPN5, CCAR2, CCNB1, CCNB2, CD320, CDH4, CDK1, CDK11A, CDK5R1, CDKN1A, CDKN1B, CDKN2AIP, CDKN2C, CELF1, CHRNA1, CLASP2, COL9A1, COLQ, CPNE1, CREG1, CRIM1, CSNK2A1, CTGF, CTTN…
GO:0016049	cell growth	GO_BiologicalProcess-GOA_09.02.2016_16h18	3.8e-06	0.0018	1.6e-07	4.7e-06	[2, 3]	Group6	26.9159	144	[ACVR1B, ADAM10, ADIPOR1, ADNP, AKAP6, AKR1B1, APBB1, APP, ARHGEF11, ARIH2, AURKA, BCL2, BCL6, BRAT1, CAMK2D, CAPN5, CCAR2, CD320, CDH4, CDK11A, CDK5R1, CDKN1A, CDKN1B, CDKN2AIP, CDKN2C, CLASP2, CPNE1, CRIM1, CSNK2A1, CTGF, CTTN, CXCL12, CYFIP1, CYR61, DCBLD2, DCLK1, DDR1, DDX39B, DERL2, DMAP1, DNAJC2, DNM2, DNPH1, DRAXIN, ENO1, EPHA7, EXOSC9, EXTL3, FAM107A, FGFR1OP, FLCN, FLRT1, FLRT3, FOXK1, F…
GO:0040008	regulation of growth	GO_BiologicalProcess-GOA_09.02.2016_16h18	3.3e-05	0.014	1.6e-07	4.7e-06	[2, 3]	Group6	25.107	176	[ACVR1B, ADAM10, ADIPOR1, ADNP, AGRN, AKAP6, AKR1B1, APBB1, APP, ARHGEF11, ATRN, ATXN2, BBC3, BCL2, BCL6, BRD8, CACNA1C, CAMK2D, CAPN5, CCAR2, CCNB1, CD320, CDH4, CDK1, CDK11A, CDK5R1, CDKN1A, CDKN1B, CDKN2AIP, CDKN2C, CELF1, CLASP2, COLQ, CREG1, CRIM1, CSNK2A1, CTGF, CTTN, CXADR, CXCL12, CYR61, DCBLD2, DDR1, DDR2, DDX39B, DERL2, DLL1, DMAP1, DNAJC2, DNM2, DNPH1, DRAXIN, DUSP6, ENO1, EPHA7, EXOSC…
GO:0048589	developmental growth	GO_BiologicalProcess-GOA_09.02.2016_16h18	6.3e-05	0.027	1.6e-07	4.7e-06	[2, 3]	Group6	25.1156	163	[ACVR2B, ADD1, ADNP, AGRN, AKAP6, AKR1B1, ANKRD11, APBA2, APP, ARID5B, ARIH2, ASPM, ATF5, ATRN, ATXN2, AURKA, BCL2, BRCA2, BRD4, CACNA1C, CAMK2D, CCNB1, CDH4, CDK1, CDK5R1, CELF1, CHRNA1, CLASP2, COL9A1, COLQ, CPNE1, CTTN, CXADR, CXCL12, CYFIP1, DCLK1, DDR2, DDX39B, DLL1, DNM2, DRAXIN, DUSP6, EPHA7, ERCC1, ERCC2, EVC, EZR, FGFR1, FGFR3, FLRT1, FLRT3, FZD7, GARS, GIGYF2, GINS1, GINS4, GJA1, GLI3, …
GO:0001558	regulation of cell growth	GO_BiologicalProcess-GOA_09.02.2016_16h18	8.6e-05	0.036	1.6e-07	4.7e-06	[3, 4, 5]	Group6	26.6033	112	[ACVR1B, ADAM10, ADIPOR1, ADNP, AKAP6, APBB1, ARHGEF11, BCL2, BCL6, CAMK2D, CAPN5, CCAR2, CD320, CDH4, CDK11A, CDK5R1, CDKN1A, CDKN1B, CDKN2AIP, CDKN2C, CLASP2, CRIM1, CSNK2A1, CTGF, CTTN, CXCL12, CYR61, DCBLD2, DDR1, DDX39B, DERL2, DMAP1, DNAJC2, DNM2, DNPH1, DRAXIN, ENO1, EPHA7, EXOSC9, EXTL3, FAM107A, FGFR1OP, FLCN, FOXK1, FOXM1, GJA1, GNG4, GSK3B, H2AFY, H2AFY2, HNRNPK, HTRA1, HYAL2, IFRD1, I…
GO:1901564	organonitrogen compound metabolic process	GO_BiologicalProcess-GOA_09.02.2016_16h18	9.3e-05	0.039	9.3e-05	0.00018	[3]	Group7	21.8167	526	[AARS, AASS, ABCA1, ABCC5, ABCD4, ABHD12, ABHD3, ACACA, ACAD8, ACD, ACER3, ACSL3, ADCY3, ADCY6, ADCY9, ADNP, ADPGK, AGO3, AGRN, AHCY, AHCYL2, AK2, AK9, AKAP12, AKAP6, AKR1B1, AKT2, ALDH18A1, ALDH1L2, ALDH5A1, ALDH7A1, AMD1, APEX1, APP, ARSB, ARSD, ARV1, ASNS, ATCAY, ATP5B, ATP5G1, ATP5G3, ATP5S, ATP6V1B2, ATXN2, B3GAT1, B3GAT2, B3GAT3, B4GALT1, B4GALT5, BCAT1, BCKDHB, BDH2, BPHL, BRF1, BTG2, BUD3…
GO:0043603	cellular amide metabolic process	GO_BiologicalProcess-GOA_09.02.2016_16h18	2.4e-07	0.00012	9.3e-05	0.00018	[4]	Group7	25.0943	266	[AARS, ACACA, ACD, ACER3, AGO3, AKT2, ALDH1L2, ALDH5A1, APEX1, APP, ASNS, ATXN2, BDH2, BRF1, BTG2, CAD, CALR, CARS, CELF1, CERK, CERS4, CERS5, CHAC1, CIRBP, CLN5, CLN6, CNOT1, CNOT3, COA1, CPE, CPNE1, CPXM1, CTNS, CYR61, DAPK3, DARS2, DDX39B, DDX3Y, DHFR, DHPS, DMD, DNAJC1, DNAJC3, DROSHA, ECE1, EEF1A2, EEF2K, EIF1, EIF1B, EIF2AK3, EIF2B1, EIF2D, EIF2S2, EIF2S3, EIF3E, EIF3H, EIF4A1, EIF4A2, EIF4…
GO:1901566	organonitrogen compound biosynthetic process	GO_BiologicalProcess-GOA_09.02.2016_16h18	9e-07	0.00044	9.3e-05	0.00018	[4]	Group7	23.7525	357	[AARS, ABCA1, ABCC5, ABHD3, ACACA, ACER3, ACSL3, ADCY3, ADCY6, ADCY9, ADNP, AGO3, AGRN, AHCY, AK2, AK9, AKAP12, AKAP6, AKT2, ALDH18A1, ALDH7A1, AMD1, APEX1, APP, ASNS, ATP5B, ATP5G1, ATP5G3, ATP5S, ATXN2, B3GAT1, B3GAT2, B3GAT3, B4GALT1, B4GALT5, BCAT1, BDH2, BRF1, BTG2, BUD31, CAD, CALR, CARS, CBSL, CELF1, CERS4, CERS5, CHAC1, CHKA, CHPF2, CHST14, CIRBP, CNOT1, CNOT3, COA1, COX15, CPAMD8, CSPG4,…
GO:0006518	peptide metabolic process	GO_BiologicalProcess-GOA_09.02.2016_16h18	7.5e-06	0.0035	9.3e-05	0.00018	[4, 5]	Group7	24.8581	219	[AARS, ACD, AGO3, AKT2, ALDH5A1, APEX1, APP, ATXN2, BDH2, BRF1, BTG2, CALR, CARS, CELF1, CHAC1, CIRBP, CLN5, CNOT1, CNOT3, COA1, CPE, CPNE1, CPXM1, CTNS, DAPK3, DARS2, DDX39B, DDX3Y, DHPS, DMD, DNAJC1, DNAJC3, DROSHA, ECE1, EEF1A2, EEF2K, EIF1, EIF1B, EIF2AK3, EIF2B1, EIF2D, EIF2S2, EIF2S3, EIF3E, EIF3H, EIF4A1, EIF4A2, EIF4EBP1, EIF4EBP2, EIF4G2, EIF5, ELAVL1, EPRS, ERO1B, ETF1, FAM129A, FARS2, …
GO:0034248	regulation of cellular amide metabolic process	GO_BiologicalProcess-GOA_09.02.2016_16h18	1.7e-06	0.00083	9.3e-05	0.00018	[4, 5]	Group7	29.2011	106	[AARS, AGO3, AKT2, APEX1, APP, ATXN2, BTG2, CALR, CELF1, CIRBP, CNOT1, CNOT3, CYR61, DAPK3, DDX39B, DNAJC1, DNAJC3, DROSHA, EIF1, EIF1B, EIF2AK3, EIF2B1, EIF3E, EIF3H, EIF4A1, EIF4A2, EIF4EBP1, EIF4EBP2, EIF4G2, EIF5, ELAVL1, EPRS, ETF1, FAM129A, FMR1, FXR1, FXR2, GARS, GIGYF2, HNRNPA2B1, HNRNPD, HNRNPR, IARS, IARS2, IGF2BP1, IGF2BP3, IGFBP5, ILF3, LARP1, LARP4B, LARP6, LARS, LARS2, LIMD1, LSM14A…
GO:0005975	carbohydrate metabolic process	GO_BiologicalProcess-GOA_09.02.2016_16h18	8.2e-07	0.0004	8.2e-07	1.6e-05	[3]	Group8	24.7903	266	[AAAS, ABCC5, ADAMTS7, ADIPOR1, ADNP, ADPGK, AGRN, AKR1B1, AKT2, ALDH5A1, ALG2, ALG6, ANK3, ARCN1, ARFGAP1, ARFGAP3, ARFGEF1, ARPP19, ARSB, ATF3, ATHL1, B3GAT1, B3GAT2, B3GAT3, B3GLCT, B4GALT1, B4GALT5, BRAT1, C1GALT1C1, CALR, CANX, CHID1, CHORDC1, CHP1, CHPF2, CHST10, CHST14, CLN5, CNIH1, COG1, COG3, COG8, COPA, COPB2, COPE, COPG1, COPG2, COPZ1, COX11, CPT1A, CRTC2, CRY1, CSPG4, CTSC, DCTN5, DCT…
GO:0044723	single-organism carbohydrate metabolic process	GO_BiologicalProcess-GOA_09.02.2016_16h18	9.9e-06	0.0046	8.2e-07	1.6e-05	[3, 4]	Group8	24.7178	219	[ADAMTS7, ADIPOR1, ADNP, ADPGK, AKR1B1, AKT2, ALDH5A1, ALG2, ALG6, ANK3, ARCN1, ARFGAP1, ARFGAP3, ARFGEF1, ARPP19, ATF3, B3GAT1, B3GAT2, B3GAT3, B3GLCT, B4GALT1, B4GALT5, BRAT1, C1GALT1C1, CALR, CANX, CHORDC1, CHP1, CHST10, CHST14, CLN5, CNIH1, COG1, COG3, COG8, COPA, COPB2, COPE, COPG1, COPG2, COPZ1, COX11, CPT1A, CRTC2, CRY1, CTSC, DCTN5, DCTN6, DDIT4, DDR2, DERL2, DHTKD1, DPM2, DPM3, DPY19L1, …
GO:0005996	monosaccharide metabolic process	GO_BiologicalProcess-GOA_09.02.2016_16h18	9.6e-05	0.04	8.2e-07	1.6e-05	[4, 5]	Group8	27.3775	95	[ADIPOR1, ADPGK, AKR1B1, AKT2, ALDH5A1, ARPP19, ATF3, B3GLCT, B4GALT1, BRAT1, COX11, CPT1A, CRTC2, CRY1, DDR2, DYRK2, ENO1, FABP5, FOXO1, FUCA2, GAPDHS, GFPT1, GOLT1B, GOT1, GOT2, GPD2, GPI, GRB10, GSK3B, GYG1, H6PD, HECTD4, HOOK3, IGF2, IGFBP4, IGFBP5, INPP5K, IRS1, IRS2, KAT2A, KAT2B, KHSRP, LDHA, LEPR, LEPROT, LRP5, MAN2A2, NISCH, NLN, NR1D1, NUDT5, OGT, PASK, PCK2, PCNX4, PDHX, PDPK1, PER2, P…
GO:0016051	carbohydrate biosynthetic process	GO_BiologicalProcess-GOA_09.02.2016_16h18	8e-05	0.033	8.2e-07	1.6e-05	[4, 5]	Group8	29.6943	68	[AKR1B1, AKT2, ARPP19, ATF3, B4GALT1, CHST10, CHST14, CRTC2, CRY1, DDR2, DYRK2, ENO1, FOXO1, GAPDHS, GFPT1, GOLT1B, GOT1, GOT2, GPD2, GPI, GRB10, GSK3B, GYG1, IGF2, INPP5K, IRS1, IRS2, KAT2A, KAT2B, KHSRP, LEPR, LEPROT, MGAT2, NANS, NDST1, NLN, NR1D1, NTSR1, OGT, PASK, PCK2, PCNX4, PER2, PGAM1, PGD, PGM1, PGM5, PGPEP1, PHGDH, PODXL, PPARGC1A, PPP1R3B, PPP1R3C, PPP4R3B, SBDS, SESN2, SIK1, SLC25A10…
GO:0044033	multi-organism metabolic process	GO_BiologicalProcess-GOA_09.02.2016_16h18	3.1e-05	0.014	3.1e-05	0.00015	[2]	Group9	30.3571	68	[AAAS, ATG16L2, CCNT1, CHD1, ELL, EP300, ERCC2, GTF2F1, GTF2H2, GTF2H5, HDAC1, HMGA2, INPP5K, JUN, MRPL13, NCBP2, NDC1, NELFA, NELFB, NELFCD, NUP107, NUP205, NUP210, NUP54, NUP58, NUP62, POLR2A, POLR2H, POLR2L, POM121, REST, RPL10A, RPL12, RPL14, RPL15, RPL21, RPL22, RPL23, RPL23A, RPL28, RPL3, RPL31, RPL37, RPL5, RPS15A, RPS2, RPS20, RPS3A, RPS6, RSL24D1, SEH1L, SSRP1, SUPT16H, SUPT5H, TAF11, TA…
GO:0019080	viral gene expression	GO_BiologicalProcess-GOA_09.02.2016_16h18	2.1e-05	0.0097	3.1e-05	0.00015	[3, 4, 5, 6]	Group9	30.8411	66	[AAAS, CCNT1, CHD1, ELL, EP300, ERCC2, GTF2F1, GTF2H2, GTF2H5, HDAC1, HMGA2, INPP5K, JUN, MRPL13, NCBP2, NDC1, NELFA, NELFB, NELFCD, NUP107, NUP205, NUP210, NUP54, NUP58, NUP62, POLR2A, POLR2H, POLR2L, POM121, REST, RPL10A, RPL12, RPL14, RPL15, RPL21, RPL22, RPL23, RPL23A, RPL28, RPL3, RPL31, RPL37, RPL5, RPS15A, RPS2, RPS20, RPS3A, RPS6, RSL24D1, SEH1L, SSRP1, SUPT16H, SUPT5H, TAF11, TARBP2, TAR…
GO:0019083	viral transcription	GO_BiologicalProcess-GOA_09.02.2016_16h18	6.1e-05	0.026	3.1e-05	0.00015	[4, 5, 6, 7, 8]	Group9	30.5419	62	[AAAS, CCNT1, CHD1, ELL, EP300, ERCC2, GTF2F1, GTF2H2, GTF2H5, HDAC1, HMGA2, INPP5K, JUN, MRPL13, NCBP2, NDC1, NELFA, NELFB, NELFCD, NUP107, NUP205, NUP210, NUP54, NUP58, NUP62, POLR2A, POLR2H, POLR2L, POM121, REST, RPL10A, RPL12, RPL14, RPL15, RPL21, RPL22, RPL23, RPL23A, RPL28, RPL3, RPL31, RPL37, RPL5, RPS15A, RPS2, RPS20, RPS3A, RPS6, RSL24D1, SEH1L, SSRP1, SUPT16H, SUPT5H, TAF11, TARBP2, TAR…
