# Supplementary material for: Zika infection of neural progenitor cells perturbs transcription in neurodevelopmental pathways
Source: PLoS One. 2017 Apr 27;12(4):e0175744. doi: 10.1371/journal.pone.0175744 (PMC5407828; doi:10.1371/journal.pone.0175744)
Supplement: S5 Table — (XLS) [file pone.0175744.s005.xls]

## Sheet: ClueGO Results
GOID	GOTerm	Ontology Source	Term PValue	Term PValue Corrected with Bonferroni step down	Group PValue	Group PValue Corrected with Bonferroni step down	GOLevels	GOGroups	% Associated Genes	Nr. Genes	Associated Genes Found
GO:0043170	macromolecule metabolic process	GO_BiologicalProcess-GOA_09.02.2016_16h18	2.9e-41	2.7e-38	3.7e-40	1.9e-38	[3]	Group0	38.7355	3633	[AAAS, AAK1, AARS, AARSD1, ABCA1, ABCA3, ABCA7, ABCC5, ABCE1, ABCF1, ABCG1, ABHD14A-ACY1, ABHD14B, ABHD5, ABI2, ABL2, ABLIM2, ACACA, ACACB, ACD, ACHE, ACP1, ACTA1, ACTA2, ACTB, ACTC1, ACTL6A, ACTL6B, ACTR8, ACVR1, ACVR1B, ACVR2B, ADAM11, ADAM12, ADAM15, ADAM19, ADAM22, ADAM28, ADAMTS10, ADAMTS12, ADAMTS13, ADAMTS15, ADAMTS18, ADAMTS3, ADAMTS6, ADAMTS7, ADAMTS8, ADAMTS9, ADAMTSL1, ADAT1, ADAT2, AD…
GO:0019538	protein metabolic process	GO_BiologicalProcess-GOA_09.02.2016_16h18	9.7e-13	8.4e-10	3.7e-40	1.9e-38	[3, 4]	Group0	37.9193	2238	[AAAS, AAK1, AARS, AARSD1, ABCA1, ABCA3, ABCA7, ABCF1, ABCG1, ABHD14A-ACY1, ABHD5, ABI2, ABL2, ACACA, ACD, ACHE, ACP1, ACTB, ACTL6A, ACVR1, ACVR1B, ACVR2B, ADAM11, ADAM12, ADAM15, ADAM19, ADAM22, ADAM28, ADAMTS10, ADAMTS12, ADAMTS13, ADAMTS15, ADAMTS18, ADAMTS3, ADAMTS6, ADAMTS7, ADAMTS8, ADAMTS9, ADAMTSL1, ADCK2, ADCY3, ADCY6, ADCY7, ADCY9, ADH5, ADM2, ADORA1, ADRA1A, ADRB2, ADRBK1, AEBP1, AGBL5…
GO:0044260	cellular macromolecule metabolic process	GO_BiologicalProcess-GOA_09.02.2016_16h18	2.2e-53	2.1e-50	3.7e-40	1.9e-38	[3, 4]	Group0	39.8176	3449	[AAAS, AAK1, AARS, AARSD1, ABCA1, ABCA3, ABCA7, ABCE1, ABCF1, ABCG1, ABHD14B, ABI2, ABL2, ABLIM2, ACD, ACHE, ACP1, ACTB, ACTL6A, ACTL6B, ACTR8, ACVR1, ACVR1B, ACVR2B, ADAMTS12, ADAMTS13, ADAMTS7, ADAMTS9, ADAMTSL1, ADAT1, ADAT2, ADCK2, ADCY3, ADCY6, ADCY7, ADCY9, ADH5, ADM2, ADNP2, ADORA1, ADRA1A, ADRB2, ADRBK1, AEBP1, AEBP2, AFF1, AFF3, AFF4, AGBL5, AGO2, AGO3, AGO4, AGRN, AHCTF1, AHI1, AHR, AIF…
GO:0010604	positive regulation of macromolecule metabolic process	GO_BiologicalProcess-GOA_09.02.2016_16h18	2.4e-10	2e-07	3.7e-40	1.9e-38	[3, 4, 5]	Group0	39.3292	1196	[ABCA7, ABCF1, ABHD14B, ABL2, ABLIM2, ACD, ACTA1, ACTA2, ACTB, ACTC1, ACVR1, ACVR1B, ACVR2B, ADCY3, ADCY6, ADCY7, ADCY9, ADM2, ADORA1, ADRA1A, ADRB2, AFF1, AGO2, AGRN, AHI1, AHR, AIFM1, AIM2, AKAP6, AKAP9, AKIRIN2, AKNA, AKR1B1, AKT2, ALS2, ANAPC1, ANAPC11, ANAPC7, ANG, ANK3, ANKRD1, ANTXR1, ANXA2, APAF1, APBB1, APC, APC2, APEX1, APITD1, APLF, ARF4, ARHGEF11, ARHGEF2, ARID3B, ARID4A, ARID4B, ARID…
GO:0031325	positive regulation of cellular metabolic process	GO_BiologicalProcess-GOA_09.02.2016_16h18	2.9e-08	2.3e-05	3.7e-40	1.9e-38	[3, 4, 5]	Group0	38.6667	1189	[ABCA1, ABCA7, ABCF1, ABHD14B, ABHD5, ABL2, ABLIM2, ACACA, ACACB, ACD, ACSL3, ACVR1, ACVR1B, ACVR2B, ADCY3, ADCY6, ADCY7, ADCY9, ADORA1, ADRA1A, ADRB2, AFF1, AGO2, AGPAT1, AGRN, AHI1, AHR, AIFM1, AIM2, AKAP6, AKAP9, AKIRIN2, AKNA, AKR1B1, AKT2, ALS2, AMBRA1, ANAPC1, ANAPC11, ANAPC7, ANG, ANKRD1, ANTXR1, ANXA1, ANXA2, APAF1, APBB1, APEX1, APITD1, APLF, APLN, ARF4, ARHGEF11, ARHGEF2, ARID3B, ARID4A…
GO:0043412	macromolecule modification	GO_BiologicalProcess-GOA_09.02.2016_16h18	3.2e-26	2.9e-23	3.7e-40	1.9e-38	[4]	Group0	41.1014	1739	[AAAS, AAK1, AARS, ABCA1, ABCA7, ABI2, ABL2, ACP1, ACTL6A, ACVR1, ACVR1B, ACVR2B, ADAMTS13, ADAMTS7, ADAMTSL1, ADAT1, ADAT2, ADCK2, ADCY3, ADCY6, ADCY7, ADCY9, ADH5, ADM2, ADORA1, ADRA1A, ADRB2, ADRBK1, AGBL5, AKAP1, AKAP6, AKAP9, AKR1B1, AKT1S1, AKT2, ALG10B, ALG13, ALG14, ALG2, ALG3, ALG5, ALG6, ALG8, ALKBH1, ALKBH2, ALKBH5, ALKBH8, ALPK3, ALS2, ANAPC1, ANAPC11, ANAPC13, ANAPC7, ANG, ANK3, ANTX…
GO:0036211	protein modification process	GO_BiologicalProcess-GOA_09.02.2016_16h18	1.4e-24	1.3e-21	3.7e-40	1.9e-38	[4, 5]	Group0	41.0534	1668	[AAAS, AAK1, ABCA1, ABCA7, ABI2, ABL2, ACP1, ACTL6A, ACVR1, ACVR1B, ACVR2B, ADAMTS13, ADAMTS7, ADAMTSL1, ADCK2, ADCY3, ADCY6, ADCY7, ADCY9, ADH5, ADM2, ADORA1, ADRA1A, ADRB2, ADRBK1, AGBL5, AKAP1, AKAP6, AKAP9, AKR1B1, AKT1S1, AKT2, ALG10B, ALG13, ALG14, ALG2, ALG3, ALG5, ALG6, ALG8, ALPK3, ALS2, ANAPC1, ANAPC11, ANAPC13, ANAPC7, ANG, ANK3, ANTXR1, ANXA1, ANXA2, APBB1, APC, APITD1, APLP2, ARCN1, …
GO:0044267	cellular protein metabolic process	GO_BiologicalProcess-GOA_09.02.2016_16h18	1e-20	9.1e-18	3.7e-40	1.9e-38	[4, 5]	Group0	39.4586	2070	[AAAS, AAK1, AARS, AARSD1, ABCA1, ABCA3, ABCA7, ABCF1, ABI2, ABL2, ACD, ACP1, ACTB, ACTL6A, ACVR1, ACVR1B, ACVR2B, ADAMTS12, ADAMTS13, ADAMTS7, ADAMTSL1, ADCK2, ADCY3, ADCY6, ADCY7, ADCY9, ADH5, ADM2, ADORA1, ADRA1A, ADRB2, ADRBK1, AGBL5, AGO2, AGO3, AGO4, AIFM1, AIM2, AKAP1, AKAP6, AKAP9, AKIRIN2, AKR1B1, AKT1S1, AKT2, ALG10B, ALG13, ALG14, ALG2, ALG3, ALG5, ALG6, ALG8, ALPK3, ALS2, ANAPC1, ANAP…
GO:0051246	regulation of protein metabolic process	GO_BiologicalProcess-GOA_09.02.2016_16h18	1.8e-05	0.013	3.7e-40	1.9e-38	[4, 5]	Group0	37.9135	1043	[AARS, AARSD1, ABCA7, ABCF1, ABL2, ACVR1, ACVR1B, ACVR2B, ADCY3, ADCY6, ADCY7, ADCY9, ADORA1, ADRA1A, ADRB2, AGO2, AGO3, AGO4, AIFM1, AIM2, AKAP1, AKAP6, AKAP9, AKIRIN2, AKR1B1, AKT1S1, AKT2, ALS2, ANAPC1, ANAPC11, ANAPC7, ANG, ANOS1, ANXA2, APAF1, APBB1, APC, APC2, APEX1, APITD1, APLP2, ARFGEF3, ARHGEF2, ARIH1, ARIH2, ARL2BP, ARL6IP5, ARNT, ARNTL, ARPP19, ARRDC3, ASH1L, ASXL2, ATF3, ATF4, ATP2B4…
GO:0032268	regulation of cellular protein metabolic process	GO_BiologicalProcess-GOA_09.02.2016_16h18	8.5e-06	0.0062	3.7e-40	1.9e-38	[4, 5, 6]	Group0	38.2273	979	[AARS, AARSD1, ABCA7, ABCF1, ABL2, ACVR1, ACVR1B, ACVR2B, ADCY3, ADCY6, ADCY7, ADCY9, ADORA1, ADRA1A, ADRB2, AGO2, AGO3, AGO4, AIFM1, AIM2, AKAP1, AKAP6, AKAP9, AKIRIN2, AKR1B1, AKT1S1, AKT2, ALS2, ANAPC1, ANAPC11, ANAPC7, ANG, ANOS1, ANXA2, APAF1, APC, APEX1, APITD1, APLP2, ARFGEF3, ARHGEF2, ARIH1, ARIH2, ARL2BP, ARL6IP5, ARNT, ARPP19, ARRDC3, ASH1L, ASXL2, ATF3, ATF4, ATP2B4, ATP6AP1, ATRAID, A…
GO:0030010	establishment of cell polarity	GO_BiologicalProcess-GOA_09.02.2016_16h18	5.6e-05	0.039	5.6e-05	0.00017	[4]	Group1	53.0973	60	[AMOTL1, ARF6, ARHGEF11, ARHGEF2, BCAS3, BRSK1, CDK5RAP2, CENPA, CHAF1B, CLASP1, CYTH1, CYTH3, DYNLT1, EPHB1, EZR, FOXJ1, FRMD4A, GBF1, GOLPH3, GSK3B, GSN, JAM3, KANK1, KIF26B, KRIT1, LAMA1, LLGL1, MAP1B, MARK2, MCPH1, MPP5, MSN, MYO9B, NDC80, NDE1, NDEL1, NEK3, PAX6, PKD1, PRKCI, PTK7, RAB11FIP2, RAP1B, RAP2A, RICTOR, RNF41, ROCK1, ROCK2, SHH, SHTN1, SIPA1L3, SNX27, SPAG5, SPDL1, SPRY2, WDR43, W…
GO:0040007	growth	GO_BiologicalProcess-GOA_09.02.2016_16h18	1.9e-05	0.013	1.9e-05	0.00019	[1]	Group10	40.4516	430	[ACACB, ACSL4, ACTA1, ACTL6A, ACVR1B, ACVR2B, ADAM15, ADIPOR1, ADNP2, ADRA1A, ADRB2, AGRN, AKAP6, AKR1B1, ANKRD11, ANXA1, APBA1, APBA2, APBB1, ARHGEF11, ARID5B, ARIH2, ASPM, ATF5, ATP6V0E2, ATXN2, AURKA, BAP1, BBC3, BBS4, BCAR1, BCL11A, BCL6, BDNF, BDNF-AS, BMP2, BMP3, BMP4, BMP7, BRAT1, BRCA2, BRD4, BRMS1L, BTG1, C3orf58, CACNA1C, CACNA2D2, CAMK2D, CAPN5, CCAR2, CCNB1, CCNB2, CCNE1, CD320, CD81,…
GO:0044710	single-organism metabolic process	GO_BiologicalProcess-GOA_09.02.2016_16h18	1.3e-08	1e-05	1.3e-08	3.8e-07	[2]	Group11	37.2093	2176	[AAAS, AADAT, AARS, AARSD1, AASS, ABCA1, ABCA7, ABCC1, ABCC4, ABCC5, ABCG1, ABHD10, ABHD14A-ACY1, ABHD14B, ABHD3, ABHD4, ABHD5, ABHD6, ABL2, ACAA2, ACACA, ACACB, ACAD10, ACAD9, ACAT1, ACBD3, ACBD5, ACD, ACHE, ACOT9, ACOX1, ACOX3, ACP6, ACSF2, ACSL3, ACSL4, ACSL6, ACSS2, ACTL6A, ACTR8, ACVR1, ACVR1B, ACVR2B, ADAL, ADAM15, ADAMTS13, ADAMTS3, ADAMTS7, ADAMTSL1, ADCK3, ADCY3, ADCY6, ADCY7, ADCY9, ADH…
GO:0002250	adaptive immune response	GO_BiologicalProcess-GOA_09.02.2016_16h18	1.5e-10	1.3e-07	3.2e-11	1.1e-09	[3]	Group12	20.2381	85	[ANXA1, APLF, BCL10, BCL3, BCL6, C1RL, C5, CAMK4, CD24, CLEC4A, CLSTN1, CRACR2A, CTSC, CTSH, DBNL, DCLRE1C, DUSP10, DUSP22, EMP2, EOMES, EPHB6, ERCC1, EXO1, EXOSC3, FADD, FAS, FASN, FOXJ1, FZD5, HLA-A, HLA-E, HMGB1, HPX, IL20RB, IL6ST, IRF1, IRF7, JAG1, JAK2, JAM3, KDM5D, LIG4, LYST, MALT1, MASP2, MEF2C, MLH1, MSH2, MSH6, MYD88, MYDGF, NBN, NDFIP1, NEDD4, NFKB2, NR4A3, PIK3CA, PIK3CB, PKN1, RC3H1…
GO:0002443	leukocyte mediated immunity	GO_BiologicalProcess-GOA_09.02.2016_16h18	4.1e-08	3.3e-05	3.2e-11	1.1e-09	[3]	Group12	21.1699	76	[APLF, BCL10, BCL3, BCL6, BCR, C1RL, C5, CAMK4, CD24, CEBPG, CHGA, CLSTN1, CPLX2, CTSC, CTSH, DUSP22, EMP2, EPHB6, ERCC1, EXO1, EXOSC3, FADD, FAS, FASN, FER, FOXJ1, FZD5, GAB2, HLA-A, HLA-E, HMGB1, HPX, IGF2, IL20RB, IRF7, JAG1, KDM5D, KIT, KMT2E, LAG3, LGALS9, LIG4, LYST, MALT1, MASP2, MLH1, MSH2, MSH6, MYD88, NBN, NDFIP1, NR4A3, PDPK1, PRAM1, PRDX1, RABGEF1, RNF168, RNF19B, SERPING1, SNX4, SPON…
GO:0002449	lymphocyte mediated immunity	GO_BiologicalProcess-GOA_09.02.2016_16h18	8.1e-07	0.00062	3.2e-11	1.1e-09	[4]	Group12	20.8633	58	[APLF, BCL10, BCL3, BCL6, C1RL, C5, CD24, CEBPG, CTSC, CTSH, DUSP22, EMP2, EPHB6, ERCC1, EXO1, EXOSC3, FADD, FAS, FASN, FOXJ1, FZD5, HLA-A, HLA-E, HMGB1, HPX, IGF2, IL20RB, IRF7, JAG1, KDM5D, LAG3, LGALS9, LIG4, LYST, MALT1, MASP2, MLH1, MSH2, MSH6, MYD88, NBN, NDFIP1, PRDX1, RNF168, RNF19B, SERPING1, SUPT6H, TANK, THOC1, TRAF2, TRAF6, TRPM4, TUBB, TUBB4B, ULBP1, ULBP3, UNG, WHSC1]
GO:0002460	adaptive immune response based on somatic recombination of immune receptors built from immunoglobulin superfamily domains	GO_BiologicalProcess-GOA_09.02.2016_16h18	8.1e-06	0.006	3.2e-11	1.1e-09	[4]	Group12	22.0641	62	[ANXA1, APLF, BCL10, BCL3, BCL6, C1RL, C5, CD24, CTSC, CTSH, DUSP22, EMP2, EPHB6, ERCC1, EXO1, EXOSC3, FADD, FAS, FASN, FOXJ1, FZD5, HLA-A, HLA-E, HMGB1, HPX, IL20RB, IRF7, JAG1, KDM5D, LIG4, LYST, MALT1, MASP2, MEF2C, MLH1, MSH2, MSH6, MYD88, MYDGF, NBN, NDFIP1, NFKB2, PKN1, RC3H1, RELB, RIPK2, RNF168, RORA, SEMA4A, SERPING1, SOCS5, SUPT6H, TANK, THOC1, TNFAIP3, TNFRSF13C, TNFSF13B, TRAF2, TRAF6…
GO:0001775	cell activation	GO_BiologicalProcess-GOA_09.02.2016_16h18	3.5e-05	0.024	3.5e-05	0.00021	[3]	Group13	28.5714	304	[ABCC4, ABHD6, ABL2, ACTB, ACTG1, ADAMTS13, ADAMTS18, ADK, ADRB2, AHR, ANXA1, AP3B1, AP3D1, APC, APLF, APOLD1, ATP11C, AXL, AZI2, AZIN2, BAD, BATF3, BCAR1, BCL10, BCL11A, BCL11B, BCL3, BCL6, BCR, BLOC1S3, BMP4, BMPER, BRAF, BRPF3, BTN2A2, C1GALT1C1, C21orf33, CAMK2B, CAMK4, CASP3, CAST, CBLB, CD151, CD24, CD276, CD47, CD59, CD81, CD83, CD9, CDKN1A, CEBPB, CEBPG, CHGA, CLIC1, CLSTN1, CNR1, COL1A1,…
GO:0045321	leukocyte activation	GO_BiologicalProcess-GOA_09.02.2016_16h18	5.4e-05	0.038	3.5e-05	0.00021	[2, 4]	Group13	27.7916	224	[ABL2, ADK, AHR, ANXA1, AP3B1, AP3D1, APC, APLF, ATP11C, AXL, AZI2, AZIN2, BAD, BATF3, BCL10, BCL11A, BCL11B, BCL3, BCL6, BCR, BLOC1S3, BMP4, BRAF, BTN2A2, C21orf33, CAMK4, CASP3, CBLB, CD151, CD24, CD276, CD47, CD59, CD81, CD83, CDKN1A, CEBPB, CEBPG, CHGA, CLSTN1, CNR1, CPLX2, CRTC3, CTPS1, CX3CL1, CXCL12, CYLD, DCLRE1C, DHRS2, DLL4, DNAJA3, DUSP22, EDN1, EFNB3, EGR1, EGR3, EHHADH, EOMES, EP300,…
GO:0045931	positive regulation of mitotic cell cycle	GO_BiologicalProcess-GOA_09.02.2016_16h18	3.7e-05	0.026	3.7e-05	0.00018	[4, 5, 6]	Group14	52.4194	65	[ANAPC11, ANKRD17, ANXA1, APEX1, ASNS, AURKA, BIRC5, BRCA2, BRD4, C21orf33, CCNB1, CCND1, CDC25B, CDC45, CDC6, CDC7, CDCA5, CDK1, CDK10, CDK4, COL26A1, CREBBP, CUL3, DBF4B, DLGAP5, DYNC1LI1, EDN1, EGF, EIF4EBP1, ESPL1, FGF8, GEN1, H2AFY, HES1, IGF2, LRP5, LSM10, MAD2L1, MDM2, MTBP, NACC2, NEUROG1, NSMCE2, NUSAP1, PCID2, PLCB1, PLK1, PLRG1, PRKCA, PTEN, PTPN11, RAB11A, RANBP1, RCC2, RPS6KB1, SH2B1…
GO:0007049	cell cycle	GO_BiologicalProcess-GOA_09.02.2016_16h18	2e-44	1.9e-41	1e-45	5.3e-44	[3]	Group15	49.12	921	[AAAS, ACTR1A, ACTR3, ACTR8, ACVR1, ACVR1B, ADCY3, AHCTF1, AHR, AKAP8, AKAP9, AKT2, ALMS1, ALPK3, ANAPC1, ANAPC11, ANAPC13, ANAPC7, ANGEL2, ANK3, ANKRD17, ANLN, ANTXR1, ANXA1, ANXA11, APBB1, APC, APEX1, APEX2, APITD1, APLP2, APPL1, ARF6, ARHGEF10, ARHGEF11, ARHGEF2, ARL3, ARL8A, ARL8B, ARNTL, ARPP19, ASCL1, ASNS, ASPM, ASUN, ATF2, ATF5, ATP2B4, ATRAID, AURKA, AURKB, AURKC, AZI2, AZIN2, B9D2, BABA…
GO:0007059	chromosome segregation	GO_BiologicalProcess-GOA_09.02.2016_16h18	2.7e-12	2.3e-09	1e-45	5.3e-44	[3]	Group15	54.0268	161	[ACTR3, ANAPC1, ANAPC11, ANAPC7, APC, APITD1, ARL8A, ARL8B, AURKB, AURKC, BHLHE40, BIRC5, BRCA1, BRCA2, BRD4, BUB1, BUB1B, BUB3, CASC5, CCNB1, CDC16, CDC20, CDC6, CDCA2, CDCA5, CDCA8, CDK5RAP2, CENPE, CENPF, CENPN, CENPW, CEP55, CEP57, CEP85, CHMP2B, CHMP6, CIT, CSNK2A2, CTCF, CUL3, DDX11, DDX3Y, DHDDS, DLGAP5, DMC1, DSCC1, DSN1, DUSP1, DYNC1LI1, ECT2, ERCC2, ERCC4, ESCO1, ESCO2, ESPL1, FAM175B, …
GO:0051301	cell division	GO_BiologicalProcess-GOA_09.02.2016_16h18	2.8e-20	2.5e-17	1e-45	5.3e-44	[3]	Group15	50.9168	361	[ACTR3, ACTR8, AHCTF1, ANAPC1, ANAPC11, ANAPC13, ANAPC7, ANK3, ANLN, ANXA11, APC, APITD1, ARF6, ARHGEF11, ARHGEF2, ARL3, ARL8A, ARL8B, ARPP19, ASPM, ASUN, ATRAID, AURKA, AURKB, AURKC, BABAM1, BBS4, BCAR1, BHLHE40, BIRC5, BIRC6, BLM, BMP4, BMP7, BRCA2, BRCC3, BUB1, BUB1B, BUB3, C9orf114, CABLES2, CAMK2B, CASC5, CCNA2, CCNB1, CCNB2, CCND1, CCND2, CCNE1, CCNE2, CCNF, CCNG2, CCNL1, CCNO, CCNT1, CCNT2…
GO:0022402	cell cycle process	GO_BiologicalProcess-GOA_09.02.2016_16h18	6.1e-35	5.6e-32	1e-45	5.3e-44	[3, 4]	Group15	49.7832	689	[AAAS, ACTR1A, ACTR3, ACTR8, ACVR1, ACVR1B, ADCY3, AHCTF1, AKAP8, AKAP9, AKT2, ALMS1, ANAPC1, ANAPC11, ANAPC13, ANAPC7, ANK3, ANKRD17, ANLN, ANTXR1, ANXA1, APBB1, APC, APEX1, APITD1, ARHGEF10, ARHGEF11, ARHGEF2, ARL3, ARL8A, ARPP19, ASPM, ASUN, ATF2, ATF5, ATP2B4, ATRAID, AURKA, AURKB, AURKC, BABAM1, BACH1, BANF1, BARD1, BBS4, BCAT1, BHLHE40, BIN1, BIRC2, BIRC5, BIRC6, BLM, BMP4, BMP7, BRCA1, BRC…
GO:0051302	regulation of cell division	GO_BiologicalProcess-GOA_09.02.2016_16h18	1.5e-05	0.011	1e-45	5.3e-44	[3, 4]	Group15	45.8084	153	[ANAPC1, ANAPC11, ANAPC7, ANLN, APC, ASPM, ATRAID, AURKA, AURKB, AURKC, BBS4, BIRC5, BIRC6, BLM, BMP4, BMP7, BRCA2, BUB1, BUB1B, BUB3, CAMK2B, CCNB1, CCND1, CCND2, CCNL1, CCNT1, CCNT2, CCNY, CCP110, CDC14A, CDC16, CDC20, CDC25B, CDC25C, CDC6, CDCA5, CDK13, CDKN1A, CDKN1B, CENPE, CENPF, CENPV, CEP85, CHEK1, CHMP2B, CIT, COL26A1, CSNK2A2, CUL3, DAPK3, DHDDS, DLGAP5, DUSP1, DYNC1LI1, E2F7, E2F8, ECT…
GO:0051726	regulation of cell cycle	GO_BiologicalProcess-GOA_09.02.2016_16h18	8.8e-22	7.8e-19	1e-45	5.3e-44	[3, 4]	Group15	47.9527	527	[AKT2, ALPK3, ANAPC1, ANAPC11, ANAPC7, ANGEL2, ANKRD17, ANLN, ANXA1, APBB1, APC, APEX1, ARNTL, ASCL1, ASNS, ASPM, ASUN, ATF2, ATF5, ATP2B4, ATRAID, AURKA, AURKB, AURKC, BAD, BAP1, BARD1, BBS4, BCCIP, BCR, BEX1, BIN1, BIRC2, BIRC5, BIRC6, BLM, BMP2, BMP4, BMP7, BOP1, BRCA1, BRCA2, BRD4, BRD7, BRINP2, BUB1, BUB1B, BUB3, C21orf33, CAB39, CABLES2, CAMK2B, CAMK2D, CAMK2N1, CAMK2N2, CASP2, CASP3, CAST,…
GO:0000278	mitotic cell cycle	GO_BiologicalProcess-GOA_09.02.2016_16h18	5.9e-42	5.5e-39	1e-45	5.3e-44	[4]	Group15	53.8249	584	[AAAS, ACTR1A, ACTR8, ACVR1, ACVR1B, AHCTF1, AKAP8, AKAP9, ALMS1, ANAPC1, ANAPC11, ANAPC13, ANAPC7, ANGEL2, ANK3, ANKRD17, ANLN, ANXA1, APC, APEX1, APITD1, ARHGEF10, ARHGEF2, ARL8A, ARPP19, ASCL1, ASNS, ASPM, ASUN, ATF2, AURKA, AURKB, AURKC, AZI2, AZIN2, B9D2, BABAM1, BACH1, BANF1, BBS4, BCAT1, BHLHE40, BIRC2, BIRC5, BIRC6, BLM, BMP4, BMP7, BRCA2, BRCC3, BRD4, BRD7, BRINP2, BRIP1, BUB1, BUB1B, BU…
GO:0045786	negative regulation of cell cycle	GO_BiologicalProcess-GOA_09.02.2016_16h18	1.9e-09	1.6e-06	1e-45	5.3e-44	[3, 4, 5]	Group15	46.729	250	[AKT2, ANAPC1, ANAPC11, ANAPC7, ANGEL2, APBB1, APC, ATF2, ATF5, ATRAID, AURKB, BARD1, BIN1, BLM, BMP2, BMP4, BMP7, BRCA1, BRD4, BRD7, BRINP2, BUB1, BUB1B, BUB3, CAB39, CASP2, CASP3, CAST, CCNA2, CCNB1, CCND1, CCNF, CDC14A, CDC16, CDC20, CDC5L, CDK1, CDK2, CDK4, CDK5R1, CDK5RAP1, CDK5RAP2, CDK5RAP3, CDK7, CDKN1A, CDKN1B, CDKN1C, CDKN2C, CDKN2D, CDKN3, CEBPA, CEL, CENPF, CGRRF1, CHEK1, CHEK2, CLSPN…
GO:0048285	organelle fission	GO_BiologicalProcess-GOA_09.02.2016_16h18	3.4e-17	3e-14	1e-45	5.3e-44	[4]	Group15	50.4777	317	[ACOX1, ACTR3, ACTR8, ADCY3, AKAP8, ANAPC1, ANAPC11, ANAPC13, ANAPC7, ANLN, APC, APITD1, ARHGEF10, ARHGEF2, ARL8A, ARPP19, ASPM, ASUN, ATG3, AURKA, AURKB, AURKC, BABAM1, BHLHE40, BIRC2, BIRC5, BIRC6, BMP4, BMP7, BNIP3, BRCA2, BRCC3, BUB1, BUB1B, BUB3, CAMK2B, CASC5, CCAR2, CCNA2, CCNB1, CCNB2, CCNF, CCNG2, CD2AP, CDC14A, CDC16, CDC20, CDC25A, CDC25B, CDC25C, CDC6, CDCA2, CDCA3, CDCA5, CDCA8, CDK1…
GO:0000075	cell cycle checkpoint	GO_BiologicalProcess-GOA_09.02.2016_16h18	2.3e-11	2e-08	1e-45	5.3e-44	[4, 5]	Group15	54.3396	144	[ANAPC1, ANAPC11, ANAPC7, ANTXR1, APC, ATF2, AURKB, BABAM1, BIRC5, BLM, BRCA1, BRCC3, BRD4, BRIP1, BRSK1, BUB1, BUB1B, BUB3, CASC5, CASP2, CCAR2, CCNA2, CCNB1, CCND1, CCNE2, CCNG2, CDC16, CDC20, CDC45, CDC5L, CDC6, CDK1, CDK2, CDK5RAP2, CDK5RAP3, CDKN1A, CDKN1B, CDT1, CENPF, CHEK1, CHEK2, CLOCK, CLSPN, CRADD, CRY1, CSNK2A2, DDX39B, DEPDC1B, DGKZ, DNA2, DTL, DUSP1, DYNC1LI1, E2F1, ERCC4, FAM175A, …
GO:0007346	regulation of mitotic cell cycle	GO_BiologicalProcess-GOA_09.02.2016_16h18	4.2e-12	3.6e-09	1e-45	5.3e-44	[4, 5]	Group15	48.8506	255	[ANAPC1, ANAPC11, ANAPC7, ANGEL2, ANKRD17, ANLN, ANXA1, APC, APEX1, ASCL1, ASNS, ASUN, ATF2, AURKA, BIRC5, BLM, BMP4, BMP7, BRCA2, BRD4, BRD7, BRINP2, BUB1, BUB1B, BUB3, C21orf33, CAMK2D, CASP2, CCNA2, CCNB1, CCND1, CDC14A, CDC16, CDC20, CDC25B, CDC25C, CDC45, CDC6, CDC7, CDCA5, CDK1, CDK10, CDK13, CDK2, CDK4, CDK5RAP3, CDKN1A, CDKN1B, CDKN1C, CENPE, CENPF, CEP85, CHEK1, CHEK2, CHMP2B, CIT, CLSPN…
GO:0010564	regulation of cell cycle process	GO_BiologicalProcess-GOA_09.02.2016_16h18	5.9e-11	5.1e-08	1e-45	5.3e-44	[4, 5]	Group15	47.138	280	[AKT2, ANAPC1, ANAPC11, ANAPC7, ANKRD17, ANLN, ANXA1, APC, APEX1, ATF5, ATP2B4, ATRAID, AURKA, AURKB, AURKC, BBS4, BIN1, BIRC5, BIRC6, BLM, BMP4, BMP7, BRCA1, BRCA2, BRD4, BRD7, BUB1, BUB1B, BUB3, CAMK2B, CAMK2D, CASP2, CAST, CCAR2, CCNA2, CCNB1, CCND1, CCND2, CCNF, CCNL1, CCNT1, CCNT2, CCNY, CCP110, CDC14A, CDC16, CDC20, CDC25B, CDC25C, CDC45, CDC5L, CDC6, CDC7, CDCA5, CDK1, CDK10, CDK13, CDK2, …
GO:0044770	cell cycle phase transition	GO_BiologicalProcess-GOA_09.02.2016_16h18	4.3e-24	3.9e-21	1e-45	5.3e-44	[4, 5]	Group15	55.5766	294	[ACTR1A, ACVR1, ACVR1B, AKAP9, ALMS1, ANAPC1, ANAPC11, ANAPC7, ANKRD17, ANLN, ANXA1, APC, APEX1, ARPP19, ATF5, ATP2B4, AURKA, BACH1, BCAT1, BIRC5, BLM, BRD4, BRD7, BRIP1, BUB1, BUB1B, BUB3, CACUL1, CAMK2B, CAMK2D, CASP2, CCNA2, CCNB1, CCNB2, CCND1, CCNE1, CCNE2, CCNY, CCP110, CDC14A, CDC16, CDC20, CDC25A, CDC25B, CDC25C, CDC34, CDC45, CDC5L, CDC6, CDC7, CDCA5, CDK1, CDK10, CDK2, CDK4, CDK5RAP2, C…
GO:1903047	mitotic cell cycle process	GO_BiologicalProcess-GOA_09.02.2016_16h18	1.8e-35	1.7e-32	1e-45	5.3e-44	[4, 5]	Group15	53.8883	492	[AAAS, ACTR1A, ACTR8, ACVR1, ACVR1B, AKAP8, AKAP9, ALMS1, ANAPC1, ANAPC11, ANAPC13, ANAPC7, ANK3, ANKRD17, ANLN, ANXA1, APC, APEX1, APITD1, ARHGEF10, ARHGEF2, ARL8A, ARPP19, ASPM, ASUN, ATF2, AURKA, AURKB, AURKC, BABAM1, BACH1, BANF1, BBS4, BCAT1, BHLHE40, BIRC2, BIRC5, BIRC6, BLM, BMP4, BMP7, BRCC3, BRD4, BRD7, BRIP1, BUB1, BUB1B, BUB3, CACUL1, CAMK2B, CAMK2D, CASC5, CASP2, CCNA2, CCNB1, CCNB2, …
GO:0007067	mitotic nuclear division	GO_BiologicalProcess-GOA_09.02.2016_16h18	3.4e-21	3e-18	1e-45	5.3e-44	[4, 5, 6]	Group15	55.7018	254	[ACTR8, AKAP8, ANAPC1, ANAPC11, ANAPC13, ANAPC7, ANLN, APC, APITD1, ARHGEF10, ARHGEF2, ARL8A, ARPP19, ASPM, ASUN, AURKA, AURKB, AURKC, BABAM1, BHLHE40, BIRC2, BIRC5, BIRC6, BMP4, BMP7, BRCC3, BUB1, BUB1B, BUB3, CASC5, CCNA2, CCNB1, CCNB2, CCNF, CCNG2, CD2AP, CDC14A, CDC16, CDC20, CDC25A, CDC25B, CDC25C, CDC6, CDCA2, CDCA3, CDCA5, CDCA8, CDK1, CDK11A, CDK11B, CDK13, CDK2, CENPE, CENPF, CENPN, CENP…
GO:0010948	negative regulation of cell cycle process	GO_BiologicalProcess-GOA_09.02.2016_16h18	5.7e-06	0.0043	1e-45	5.3e-44	[4, 5, 6]	Group15	47.5	133	[ANAPC1, ANAPC11, ANAPC7, APC, ATF5, AURKB, BLM, BMP4, BMP7, BRCA1, BRD4, BRD7, BUB1, BUB1B, BUB3, CASP2, CAST, CCNA2, CCNB1, CCND1, CCNF, CDC16, CDC20, CDC5L, CDK1, CDK2, CDK4, CDK5RAP2, CDK5RAP3, CDKN1A, CDKN1B, CENPF, CHEK1, CHEK2, CLSPN, CRADD, CSNK2A2, CTDSP1, CTDSPL, DACT1, DDX39B, DGKZ, DUSP1, DYNC1LI1, E2F7, E2F8, ERC2, ERCC4, ESPL1, FANCI, FBXO31, FBXO5, FBXW7, FGFR2, FGFR3, FHL1, FOXN3,…
GO:0045930	negative regulation of mitotic cell cycle	GO_BiologicalProcess-GOA_09.02.2016_16h18	7.1e-06	0.0052	1e-45	5.3e-44	[4, 5, 6]	Group15	48.0315	122	[ANAPC1, ANAPC11, ANAPC7, ANGEL2, APC, ATF2, BLM, BMP4, BMP7, BRD7, BRINP2, BUB1, BUB1B, BUB3, CASP2, CCNA2, CCNB1, CCND1, CDC16, CDC20, CDK1, CDK2, CDK5RAP3, CDKN1A, CDKN1B, CENPF, CHEK1, CHEK2, CLSPN, CRADD, CSNK2A2, CTDSP1, CTDSPL, DACT1, DGKZ, DUSP1, DYNC1LI1, E2F7, FANCI, FBXO31, FGFR2, FGFR3, FHL1, FOXN3, FOXO4, FZD3, GAS1, GEN1, GIGYF2, GTSE1, HECA, HMGA2, HUS1, IER3, JADE1, KANK2, KNTC1, …
GO:0032501	multicellular organismal process	GO_BiologicalProcess-GOA_09.02.2016_16h18	1.2e-05	0.0089	0.00036	0.00036	[1]	Group16	32.5254	2402	[AAAS, AARS, ABCA1, ABCA5, ABCA7, ABCB6, ABCC4, ABCG1, ABHD6, ABI2, ABL2, ABLIM2, ACACA, ACACB, ACAT1, ACD, ACHE, ACKR1, ACOX1, ACP6, ACSL3, ACSL4, ACTA1, ACTA2, ACTB, ACTC1, ACTG1, ACTL6A, ACTL6B, ACTR3, ACVR1, ACVR1B, ACVR2B, ADAM15, ADAM19, ADAM22, ADAM28, ADAMTS12, ADAMTS13, ADAMTS18, ADAMTS3, ADAMTS6, ADAMTS7, ADAMTS9, ADCY3, ADCY6, ADCY7, ADCY9, ADGRB1, ADGRB2, ADGRB3, ADGRL2, ADH5, ADK, AD…
GO:0032502	developmental process	GO_BiologicalProcess-GOA_09.02.2016_16h18	2.6e-05	0.019	0.00036	0.00036	[1]	Group16	36.3695	2248	[AARS, ABCA1, ABCA5, ABCB6, ABCC4, ABCG1, ABHD5, ABI2, ABL2, ABLIM2, ACACB, ACAT1, ACD, ACHE, ACP6, ACSL3, ACSL4, ACTA1, ACTA2, ACTB, ACTC1, ACTG1, ACTL6A, ACTL6B, ACTR3, ACVR1, ACVR1B, ACVR2B, ADAM12, ADAM15, ADAM19, ADAM22, ADAMTS12, ADAMTS18, ADAMTS6, ADAMTS7, ADAMTS9, ADCY6, ADGRB1, ADGRB2, ADGRB3, ADGRL2, ADM2, ADNP2, ADORA1, ADRA1A, ADRB2, ADRBK1, AEBP1, AFF3, AFF4, AGFG1, AGO2, AGPAT2, AGP…
GO:0044767	single-organism developmental process	GO_BiologicalProcess-GOA_09.02.2016_16h18	1e-05	0.0079	0.00036	0.00036	[2]	Group16	36.4889	2224	[AARS, ABCA1, ABCA5, ABCB6, ABCC4, ABCG1, ABHD5, ABI2, ABL2, ABLIM2, ACACB, ACAT1, ACD, ACHE, ACP6, ACSL3, ACSL4, ACTA1, ACTA2, ACTB, ACTC1, ACTG1, ACTL6A, ACTL6B, ACTR3, ACVR1, ACVR1B, ACVR2B, ADAM12, ADAM15, ADAM19, ADAM22, ADAMTS12, ADAMTS18, ADAMTS6, ADAMTS7, ADAMTS9, ADCY6, ADGRB1, ADGRB2, ADGRB3, ADGRL2, ADM2, ADNP2, ADORA1, ADRA1A, ADRB2, ADRBK1, AEBP1, AFF3, AFF4, AGFG1, AGO2, AGPAT5, AGR…
GO:0048856	anatomical structure development	GO_BiologicalProcess-GOA_09.02.2016_16h18	7e-06	0.0052	0.00036	0.00036	[2]	Group16	36.7121	2021	[AARS, ABCB6, ABCC4, ABI2, ABL2, ABLIM2, ACACB, ACAT1, ACD, ACHE, ACP6, ACSL3, ACSL4, ACTA1, ACTA2, ACTB, ACTC1, ACTG1, ACTL6A, ACTL6B, ACTR3, ACVR1, ACVR1B, ACVR2B, ADAM12, ADAM15, ADAM19, ADAM22, ADAMTS12, ADAMTS18, ADAMTS6, ADAMTS7, ADCY6, ADGRB1, ADGRB2, ADGRB3, ADGRL2, ADM2, ADNP2, ADORA1, ADRA1A, ADRB2, ADRBK1, AEBP1, AFF3, AFF4, AGFG1, AGPAT2, AGPAT5, AGRN, AHI1, AHR, AIFM1, AK2, AK7, AKAP…
GO:0007275	multicellular organismal development	GO_BiologicalProcess-GOA_09.02.2016_16h18	4.5e-05	0.031	0.00036	0.00036	[3]	Group16	36.5751	1918	[AARS, ABCB6, ABI2, ABL2, ABLIM2, ACACB, ACAT1, ACD, ACHE, ACP6, ACSL3, ACSL4, ACTA1, ACTA2, ACTB, ACTC1, ACTG1, ACTL6A, ACTL6B, ACTR3, ACVR1, ACVR1B, ACVR2B, ADAM15, ADAM19, ADAM22, ADAMTS12, ADAMTS18, ADAMTS6, ADAMTS7, ADAMTS9, ADCY6, ADGRB1, ADGRB2, ADGRB3, ADGRL2, ADM2, ADNP2, ADORA1, ADRA1A, ADRB2, ADRBK1, AEBP1, AFF3, AGFG1, AGO2, AGPAT5, AGRN, AHI1, AHR, AIFM1, AK2, AK7, AKAP6, AKAP9, AKIR…
GO:0030030	cell projection organization	GO_BiologicalProcess-GOA_09.02.2016_16h18	1.5e-12	1.3e-09	0.00036	0.00036	[3]	Group16	42.3264	695	[ABCC4, ABI2, ABL2, ABLIM2, ACSL4, ACTB, ACTG1, ACTR3, ADCY6, ADGRB1, ADGRB3, AGRN, AHI1, AK7, AKAP9, ALS2, ANK3, ANKRD1, ANOS1, AP2A2, APBB1, APC, APEX1, APH1A, ARF1, ARF4, ARF6, ARFIP2, ARHGAP39, ARHGEF1, ARHGEF11, ARHGEF6, ARL13B, ARL3, ARL6, ARMC4, ARPIN, ARSB, ASAP1, ATCAY, ATG3, ATMIN, ATP2B4, ATP6V1D, ATXN2, AURKA, B9D1, B9D2, BAG4, BAIAP2, BBIP1, BBS10, BBS12, BBS4, BBS7, BCAS3, BCL11A, B…
GO:0048869	cellular developmental process	GO_BiologicalProcess-GOA_09.02.2016_16h18	1.7e-05	0.012	0.00036	0.00036	[3]	Group16	37.0388	1596	[ABCA1, ABCA5, ABCC4, ABCG1, ABHD5, ABI2, ABL2, ABLIM2, ACD, ACHE, ACP6, ACSL4, ACTA1, ACTA2, ACTB, ACTC1, ACTG1, ACTR3, ACVR1, ACVR1B, ACVR2B, ADAM12, ADAM15, ADAM22, ADAMTS12, ADAMTS7, ADCY6, ADGRB1, ADGRB3, ADNP2, ADRB2, AFF4, AGFG1, AGPAT5, AGRN, AHI1, AIFM1, AK7, AKAP6, AKAP9, AKR1B1, AKT2, ALDOC, ALKBH5, ALPK3, ALPL, ALS2, AMBRA1, ANG, ANK3, ANKRD1, ANKRD17, ANLN, ANOS1, ANTXR1, ANXA1, ANXA…
GO:0032989	cellular component morphogenesis	GO_BiologicalProcess-GOA_09.02.2016_16h18	2.1e-08	1.7e-05	0.00036	0.00036	[3, 4]	Group16	40.5565	685	[ABCC4, ABL2, ABLIM2, ACTA1, ACTB, ACTC1, ACTG1, ACTR3, ADAM15, ADGRB1, ADGRB3, AGFG1, AGRN, AHI1, AK7, AKAP9, AKR1B1, ALS2, ANK3, ANKRD1, ANOS1, ANTXR1, ANXA1, AP1AR, AP2A2, APBB1, APC, APEX1, APH1A, ARAP3, ARHGAP39, ARHGEF1, ARHGEF11, ARHGEF18, ARHGEF2, ARL13B, ARL3, ARL6, ARMC4, ARPIN, ASAP1, ATG3, ATMIN, ATP2B4, ATP6V1D, ATXN2, AURKA, AXL, B9D1, B9D2, BAIAP2, BAMBI, BBIP1, BBS10, BBS4, BBS7, …
GO:0048731	system development	GO_BiologicalProcess-GOA_09.02.2016_16h18	6e-06	0.0044	0.00036	0.00036	[3, 4]	Group16	37.0347	1731	[AARS, ABCB6, ABI2, ABL2, ABLIM2, ACACB, ACAT1, ACD, ACHE, ACP6, ACSL3, ACSL4, ACTA1, ACTA2, ACTB, ACTC1, ACTG1, ACTL6A, ACTL6B, ACTR3, ACVR1, ACVR1B, ACVR2B, ADAM15, ADAM19, ADAM22, ADAMTS12, ADAMTS18, ADAMTS6, ADAMTS7, ADCY6, ADGRB1, ADGRB2, ADGRB3, ADGRL2, ADM2, ADNP2, ADORA1, ADRA1A, ADRB2, ADRBK1, AEBP1, AGPAT5, AGRN, AHI1, AHR, AIFM1, AK2, AK7, AKAP6, AKAP9, AKR1B1, AKT2, ALDH3A2, ALDH5A1, …
GO:0048468	cell development	GO_BiologicalProcess-GOA_09.02.2016_16h18	4.6e-05	0.032	0.00036	0.00036	[3, 4, 5]	Group16	38.0629	896	[ABI2, ABL2, ABLIM2, ACHE, ACSL4, ACTA1, ACTA2, ACTB, ACTC1, ACTG1, ACTR3, ACVR1, ADAM15, ADAM22, ADCY6, ADGRB1, ADGRB3, AFF4, AGFG1, AGRN, AHI1, AKAP6, AKAP9, AKR1B1, AKT2, ALPK3, ALS2, ANG, ANK3, ANKRD1, ANOS1, ANTXR1, ANXA2, AP1AR, AP2A2, APBB1, APC, APEX1, APH1A, ARF1, ARF4, ARF6, ARHGAP39, ARHGEF1, ARHGEF10, ARHGEF11, ARHGEF2, ARID4A, ARID4B, ARID5B, ARIH2, ARL13B, ARL3, ARNTL, ARSB, ASAP1, …
GO:0000902	cell morphogenesis	GO_BiologicalProcess-GOA_09.02.2016_16h18	8.9e-09	7.3e-06	0.00036	0.00036	[4, 5]	Group16	40.9204	658	[ABCC4, ABL2, ABLIM2, ACTB, ACTG1, ACTR3, ADAM15, ADGRB1, ADGRB3, AGRN, AHI1, AK7, AKAP9, AKR1B1, ALS2, ANK3, ANOS1, ANTXR1, ANXA1, AP1AR, AP2A2, APBB1, APC, APEX1, APH1A, ARAP3, ARHGAP39, ARHGEF1, ARHGEF11, ARHGEF18, ARHGEF2, ARL13B, ARL3, ARL6, ARMC4, ARPIN, ASAP1, ATG3, ATMIN, ATP2B4, ATP6V1D, ATXN2, AURKA, AXL, B9D1, B9D2, BAIAP2, BAMBI, BBIP1, BBS10, BBS4, BBS7, BCL11A, BCL11B, BCL6, BCL9L, …
GO:0007399	nervous system development	GO_BiologicalProcess-GOA_09.02.2016_16h18	1.2e-12	1e-09	0.00036	0.00036	[4, 5]	Group16	40.5469	1038	[AARS, ABCB6, ABI2, ABL2, ABLIM2, ACAT1, ACD, ACHE, ACSL3, ACSL4, ACTB, ACTG1, ACTL6A, ACTL6B, ACTR3, ACVR1B, ADAM22, ADCY6, ADGRB1, ADGRB2, ADGRB3, ADGRL2, ADNP2, ADORA1, AGRN, AHI1, AIFM1, AK2, AK7, AKAP9, AKT2, ALDH3A2, ALDH5A1, ALS2, AMBRA1, AMIGO2, ANK3, ANKRD1, ANOS1, ANXA1, AP2A2, APAF1, APBA1, APBA2, APBB1, APC, APCDD1, APEX1, APH1A, APLP1, APLP2, ARCN1, ARF1, ARF4, ARF6, ARHGAP11B, ARHGA…
GO:0032990	cell part morphogenesis	GO_BiologicalProcess-GOA_09.02.2016_16h18	2.5e-10	2.1e-07	0.00036	0.00036	[4, 5]	Group16	42.7406	524	[ABCC4, ABL2, ABLIM2, ACTB, ACTG1, ACTR3, ADGRB1, ADGRB3, AGRN, AHI1, AK7, AKAP9, ALS2, ANK3, ANOS1, AP2A2, APBB1, APC, APEX1, APH1A, ARHGAP39, ARHGEF1, ARHGEF11, ARL13B, ARL3, ARL6, ARMC4, ARPIN, ASAP1, ATG3, ATMIN, ATP6V1D, ATXN2, AURKA, B9D1, B9D2, BAIAP2, BBIP1, BBS10, BBS4, BBS7, BCL11A, BCL11B, BDNF, BDNF-AS, BMP7, BRAF, BRAP, BRSK1, C21orf2, C21orf59, C2CD3, C5orf30, C5orf42, CACNA1C, CACN…
GO:0000904	cell morphogenesis involved in differentiation	GO_BiologicalProcess-GOA_09.02.2016_16h18	3.9e-05	0.027	0.00036	0.00036	[4, 5, 6]	Group16	40	454	[ABL2, ABLIM2, ACTB, ACTG1, ACTR3, ADAM15, ADGRB1, ADGRB3, AGRN, AKAP9, AKR1B1, ALS2, ANK3, ANOS1, ANTXR1, AP1AR, AP2A2, APBB1, APC, APH1A, ARHGAP39, ARHGEF1, ARHGEF11, ARL13B, ATP2B4, AXL, BAIAP2, BAMBI, BCL11A, BCL11B, BCL9L, BDNF, BDNF-AS, BMP2, BMP4, BMP7, BRAF, BRAP, BRSK1, C1GALT1C1, C21orf33, CACNA1C, CACNA1G, CACNB1, CACNB4, CAMK2B, CAMK2D, CASP3, CD24, CDH11, CDH2, CDH23, CDH4, CDK5R1, C…
GO:0007417	central nervous system development	GO_BiologicalProcess-GOA_09.02.2016_16h18	1.3e-07	0.0001	0.00036	0.00036	[4, 5, 6]	Group16	42.0744	430	[AARS, ABCB6, ABL2, ACAT1, ACD, ACSL3, ACTB, ACTL6A, ACTL6B, ACVR1B, ADAM22, AHI1, AK2, AK7, ALDH3A2, ALDH5A1, APAF1, APEX1, APLP2, ARCN1, ARF4, ARHGAP11B, ARL13B, ARL6, ARMC4, ARNT2, ARSA, ARSB, ASCL1, ASPM, ATF5, ATP2B1, ATP2B4, ATXN2, AXIN1, AXL, B3GNT5, BAD, BAG3, BBS4, BBS7, BCL11B, BCR, BDH1, BIN1, BMP2, BMP4, BOK, BRCA1, BRCA2, BTD, BTG2, BUD31, BYSL, C1D, C21orf33, C2CD3, C5orf42, CASP2, …
GO:0048858	cell projection morphogenesis	GO_BiologicalProcess-GOA_09.02.2016_16h18	2.8e-10	2.3e-07	0.00036	0.00036	[4, 5, 6]	Group16	42.7861	516	[ABCC4, ABL2, ABLIM2, ACTB, ACTG1, ACTR3, ADGRB1, ADGRB3, AGRN, AHI1, AK7, AKAP9, ALS2, ANK3, ANOS1, AP2A2, APBB1, APC, APEX1, APH1A, ARHGAP39, ARHGEF1, ARHGEF11, ARL13B, ARL3, ARL6, ARMC4, ARPIN, ASAP1, ATG3, ATMIN, ATP6V1D, ATXN2, AURKA, B9D1, B9D2, BAIAP2, BBIP1, BBS10, BBS4, BBS7, BCL11A, BCL11B, BDNF, BDNF-AS, BMP7, BRAF, BRAP, BRSK1, C21orf2, C21orf59, C2CD3, C5orf30, C5orf42, CACNA1C, CACN…
GO:0060284	regulation of cell development	GO_BiologicalProcess-GOA_09.02.2016_16h18	3.4e-05	0.024	0.00036	0.00036	[4, 5, 6]	Group16	40.7735	369	[ABL2, ADCY6, ADGRB3, AKAP6, ANKRD1, AP1AR, APBB1, APEX1, ARF1, ARF6, ARHGEF1, ARHGEF2, ARNTL, ARSB, ASAP1, ASCL1, ASPM, ATF5, ATP6AP1, ATXN1, AURKA, B4GALT1, BAD, BAIAP2, BAMBI, BCL11A, BCL11B, BCL6, BCL9L, BDNF, BDNF-AS, BHLHE23, BIN1, BMP2, BMP4, BMP7, BNIP2, BRAF, BRINP2, BUD31, C1D, C21orf33, CAMK1D, CAMK2B, CASZ1, CD24, CDC20, CDH2, CDH4, CDK1, CDK5R1, CDK5RAP1, CDK5RAP2, CDK5RAP3, CDKL5, C…
GO:0048666	neuron development	GO_BiologicalProcess-GOA_09.02.2016_16h18	5e-07	0.00039	0.00036	0.00036	[4, 5, 6, 8, 9]	Group16	40.6667	549	[ABI2, ABL2, ABLIM2, ACSL4, ACTB, ACTG1, ACTR3, ADCY6, ADGRB1, ADGRB3, AGRN, AHI1, AKAP9, ALS2, ANK3, ANKRD1, ANOS1, AP2A2, APBB1, APC, APH1A, ARF1, ARF4, ARF6, ARHGAP39, ARHGEF1, ARHGEF11, ARL3, ARSB, ASAP1, ASCL1, ATCAY, ATF5, ATP2B4, ATXN2, AURKA, BAIAP2, BBS4, BCL11A, BCL11B, BDNF, BDNF-AS, BHLHE23, BLOC1S1, BLOC1S2, BLOC1S3, BMP4, BMP7, BRAF, BRAP, BRSK1, BTG2, BUD31, C1D, C21orf33, CACNA1C,…
GO:0031175	neuron projection development	GO_BiologicalProcess-GOA_09.02.2016_16h18	6.3e-08	5e-05	0.00036	0.00036	[4, 5, 6, 7, 9, 10]	Group16	41.604	498	[ABI2, ABL2, ABLIM2, ACSL4, ACTB, ACTG1, ACTR3, ADCY6, ADGRB1, ADGRB3, AGRN, AKAP9, ALS2, ANK3, ANKRD1, ANOS1, AP2A2, APBB1, APC, APH1A, ARF1, ARF4, ARF6, ARHGAP39, ARHGEF1, ARHGEF11, ARSB, ASAP1, ATCAY, ATXN2, AURKA, BAIAP2, BBS4, BCL11A, BCL11B, BDNF, BDNF-AS, BLOC1S1, BLOC1S2, BLOC1S3, BMP4, BMP7, BRAF, BRAP, BRSK1, BTG2, BUD31, C1D, CACNA1C, CACNA1G, CACNB1, CACNB4, CAMK1D, CAMK2B, CAMK2D, CA…
GO:0002376	immune system process	GO_BiologicalProcess-GOA_09.02.2016_16h18	1.2e-09	1e-06	1.8e-10	5.7e-09	[1]	Group17	29.4139	828	[ABCF3, ABL2, ACP6, ACTB, ACTG1, ACTR1A, ACTR3, ACVR1B, ADAM15, ADAMTS13, ADCY3, ADCY6, ADCY7, ADCY9, ADK, ADORA1, ADRBK1, AGO2, AGO3, AGO4, AGPAT5, AHCY, AHR, AIM2, AK7, AKAP9, AKIRIN2, AKT1S1, ALKBH5, ANG, ANKRD17, ANLN, ANXA1, ANXA2, AP1S1, AP1S2, AP2A2, AP3B1, AP3D1, APC, APLF, APLN, APOBEC3C, ARF1, ARHGEF2, ARID4A, ARIH2, ARMC6, ARNT, ASS1, ASXL2, ATF2, ATP11C, ATP1B2, ATP1B3, ATP6AP1, ATP6V…
GO:0006955	immune response	GO_BiologicalProcess-GOA_09.02.2016_16h18	6.4e-17	5.6e-14	1.8e-10	5.7e-09	[2]	Group17	25.7855	476	[ABL2, ACTB, ACTG1, ACTR3, ADAM15, ADAMTS13, ADCY3, ADCY6, ADCY7, ADCY9, ADRBK1, AGO2, AGO3, AGO4, AHCY, AIM2, AK7, AKAP9, AKIRIN2, AKT1S1, ANG, ANKRD17, ANXA1, APLF, APLN, APOBEC3C, ARHGEF2, ASS1, ATF2, AXL, BAD, BAIAP2, BCAR1, BCL10, BCL3, BCL6, BCR, BIRC2, BRAF, BRAP, BRK1, C1RL, C5, CACNB4, CAMK2B, CAMK2D, CAMK4, CAPZA2, CBLB, CCR6, CD164, CD24, CD276, CD58, CD59, CD81, CD83, CDKN1A, CDKN1B, …
GO:0002682	regulation of immune system process	GO_BiologicalProcess-GOA_09.02.2016_16h18	3e-08	2.4e-05	1.8e-10	5.7e-09	[2, 3]	Group17	28.2779	468	[ACTB, ACTG1, ACTR3, ACVR1B, ADK, ADORA1, AGO2, AGO3, AGO4, AHR, AIM2, AKAP9, AKT1S1, ALKBH5, ANKRD17, ANXA1, AP1S1, AP1S2, AP2A2, AP3B1, AP3D1, APC, APLF, ARF1, ARID4A, ARNT, ASXL2, ATF2, ATP11C, ATP6AP1, ATP6V1H, ATXN1L, AXL, BAD, BAIAP2, BCAR1, BCL10, BCL6, BCR, BIRC2, BLOC1S3, BMP4, BRAF, BRAP, BRK1, BTN2A2, C1RL, C21orf33, C5, CA2, CACNB4, CAMK1D, CAMK2B, CAMK2D, CAMK4, CASP3, CBLB, CCR6, CD…
GO:0002684	positive regulation of immune system process	GO_BiologicalProcess-GOA_09.02.2016_16h18	9.1e-08	7.2e-05	1.8e-10	5.7e-09	[2, 3, 4]	Group17	26.8081	278	[ACTB, ACTG1, ACTR3, ACVR1B, ADK, AIM2, ANKRD17, ANXA1, AP3B1, AP3D1, ARNT, ASXL2, ATF2, ATP11C, ATP6AP1, ATXN1L, AXL, BAD, BAIAP2, BCAR1, BCL10, BCL6, BIRC2, BLOC1S3, BRK1, C1RL, C21orf33, C5, CA2, CACNB4, CAMK1D, CBLB, CCR6, CD24, CD276, CD47, CD59, CD81, CD83, CDKN1A, CHUK, CLEC4A, CLSTN1, CMTM3, CNPY3, CNR1, COLEC12, CREBBP, CRK, CTNNBIP1, CTSB, CX3CL1, CXCL12, CXCL14, CXCL3, CYBA, CYFIP1, CY…
GO:0006952	defense response	GO_BiologicalProcess-GOA_09.02.2016_16h18	1.4e-14	1.2e-11	1.8e-10	5.7e-09	[3]	Group17	26.7641	531	[ABCF1, ABCF3, ABL2, ACKR1, ACTB, ACTG1, ACTR3, ACVR1, ADAM15, ADAMTS12, ADAMTS13, ADCY3, ADCY6, ADCY7, ADCY9, ADORA1, ADRB2, ADRBK1, AGO2, AGO3, AGO4, AHCY, AIM2, AK7, AKAP9, AKIRIN2, AKT1S1, ALKBH5, ALS2, ANG, ANKRD17, ANXA1, AP1S1, AP1S2, AP2A2, APOBEC3C, ARF1, ARHGEF2, ASH1L, ASS1, ATF2, ATP6V1H, AXL, B4GALT1, BAD, BAIAP2, BCL10, BCL3, BCL6, BCR, BDNF, BDNF-AS, BIRC2, BMP2, BNIP3, BRAF, BRAP,…
GO:0045087	innate immune response	GO_BiologicalProcess-GOA_09.02.2016_16h18	4.4e-08	3.5e-05	1.8e-10	5.7e-09	[3, 4]	Group17	27.2502	330	[ABL2, ACTB, ACTG1, ACTR3, ADAM15, ADAMTS13, ADCY3, ADCY6, ADCY7, ADCY9, ADRBK1, AGO2, AGO3, AGO4, AIM2, AKAP9, AKIRIN2, AKT1S1, ANG, ANKRD17, ANXA1, APOBEC3C, ARHGEF2, ASS1, ATF2, AXL, BAD, BAIAP2, BCL10, BIRC2, BRAF, BRAP, BRK1, C1RL, C5, CAMK2B, CAMK2D, CAMK4, CAPZA2, CCR6, CD58, CD59, CDKN1A, CDKN1B, CEBPG, CHGA, CHID1, CHUK, CLEC4A, CLSTN1, CNPY3, COLEC12, CPAMD8, CRCP, CREBBP, CRK, CTSB, CU…
GO:0050776	regulation of immune response	GO_BiologicalProcess-GOA_09.02.2016_16h18	6.6e-07	0.00051	1.8e-10	5.7e-09	[3, 4]	Group17	27.5831	307	[ACTB, ACTG1, ACTR3, AGO2, AGO3, AGO4, AIM2, AKAP9, AKT1S1, ANKRD17, ANXA1, APLF, ATF2, BAD, BAIAP2, BCAR1, BCL10, BCL6, BCR, BIRC2, BRAF, BRAP, BRK1, C1RL, C5, CACNB4, CAMK2B, CAMK2D, CBLB, CD24, CD276, CD59, CD81, CDKN1A, CDKN1B, CHUK, CLEC2D, CLEC4A, CLSTN1, CMTM3, CNPY3, CNR1, COL1A1, COL2A1, COLEC12, CREBBP, CRK, CTSB, CTSH, CUL3, CYBA, CYFIP1, CYLD, DDX58, DNAJA3, DOCK1, DUSP10, DUSP22, DUS…
GO:0050778	positive regulation of immune response	GO_BiologicalProcess-GOA_09.02.2016_16h18	1.3e-06	0.001	1.8e-10	5.7e-09	[3, 4, 5]	Group17	26.2599	198	[ACTB, ACTG1, ACTR3, AIM2, ANKRD17, ANXA1, ATF2, BAIAP2, BCAR1, BCL10, BIRC2, BRK1, C1RL, C5, CACNB4, CBLB, CD24, CD59, CHUK, CLEC4A, CLSTN1, CMTM3, CNPY3, CNR1, COLEC12, CREBBP, CRK, CTSB, CYBA, CYFIP1, CYLD, DDX58, DOCK1, DUSP22, DUSP4, DUSP6, DUSP7, EHHADH, ELF1, ELK1, ELMO1, EP300, EXOSC3, EZR, FADD, FBXW11, FLOT1, FOS, FZD5, GAB2, GPRC5B, HLA-A, HLA-E, HMGB1, HMGB2, HPX, HSP90AA1, HSP90B1, H…
GO:0002253	activation of immune response	GO_BiologicalProcess-GOA_09.02.2016_16h18	6e-05	0.042	1.8e-10	5.7e-09	[2, 4, 5, 6]	Group17	26.8092	163	[ACTB, ACTG1, ACTR3, AIM2, ANKRD17, ATF2, BAIAP2, BCAR1, BCL10, BIRC2, BRK1, C1RL, C5, CACNB4, CBLB, CD59, CHUK, CLEC4A, CLSTN1, CMTM3, CNPY3, COLEC12, CREBBP, CRK, CTSB, CYBA, CYFIP1, CYLD, DDX58, DOCK1, DUSP22, DUSP4, DUSP6, DUSP7, EHHADH, ELF1, ELK1, ELMO1, EP300, EZR, FADD, FBXW11, FLOT1, FOS, HMGB1, HSP90AA1, HSP90B1, HSPA1B, ICAM2, IKBKB, IRAK1, IRF1, IRF7, ITCH, ITPR1, ITPR3, JUN, LGALS9, …
GO:0002429	immune response-activating cell surface receptor signaling pathway	GO_BiologicalProcess-GOA_09.02.2016_16h18	1.5e-05	0.011	1.8e-10	5.7e-09	[4, 6, 7, 8]	Group17	24.2347	95	[ACTB, ACTG1, ACTR3, BAIAP2, BCAR1, BCL10, BRK1, CACNB4, CBLB, CHUK, CLEC4A, CLSTN1, CMTM3, CREBBP, CRK, CYFIP1, DOCK1, DUSP22, ELF1, ELMO1, EP300, EZR, FBXW11, HSP90AA1, ICAM2, IKBKB, ITPR1, ITPR3, LIMK1, MALT1, MAPK1, MEF2C, MYO10, NCK1, NCOR2, NFKB1, NFKB2, NFKBIA, NR4A3, PAK1, PAK3, PAWR, PDE4D, PDPK1, PHPT1, PIK3CA, PIK3CB, PKN1, PLCL2, PLD2, PLEKHA1, PPP3CA, PPP3R1, PRKACB, PRKCA, PRKCE, PR…
GO:0050808	synapse organization	GO_BiologicalProcess-GOA_09.02.2016_16h18	8.4e-07	0.00064	8.4e-07	1.8e-05	[3]	Group18	49.4024	124	[ACHE, ADGRB1, ADGRB2, ADGRB3, ADGRL2, AGRN, ALS2, AMIGO2, ANK3, ATP2B4, BDNF, BDNF-AS, BSN, CACNA2D2, CACNB1, CACNB4, CAMK2B, CDC20, CDH2, CEL, CHRNA1, CHRNB1, CLSTN1, CLSTN2, CLSTN3, CNTN2, COL4A1, COL4A5, COLQ, CTNNA2, DACT1, DBNL, DMPK, DNAJA3, DNER, DNM3, EEF2K, ELFN1, EPHA7, EPHB1, EPHB2, ERBB2, ETV5, F2R, FBXO45, FGFR2, FLRT1, FLRT2, FLRT3, FNTA, FZD5, FZR1, GHRL, GPHN, GPM6A, IGSF9, LAMB2…
GO:0003008	system process	GO_BiologicalProcess-GOA_09.02.2016_16h18	7.5e-24	6.8e-21	7.5e-24	3.6e-22	[2]	Group19	24.8831	532	[AAAS, AARS, ABCA7, ABI2, ABL2, ACD, ACTA1, ACTA2, ACTC1, ADCY3, ADCY6, ADCY7, ADCY9, ADH5, ADK, ADM2, ADORA1, ADRA1A, ADRB2, ADRBK1, AGTRAP, AKAP1, AKAP6, AKAP9, AKR1B1, ALDH7A1, ANK3, ANO1, ANXA1, ANXA2, AP1S2, APLN, APLP2, ARF4, ARHGEF11, ARL6, ASIC1, ATAD1, ATF6, ATP1A1, ATP1A2, ATP1A3, ATP1B2, ATP1B3, ATP2A3, ATP2B1, ATP2B4, ATP8A1, ATXN1, ATXN2, ATXN7, AVPR1B, AXIN1, BBS10, BBS4, BBS7, BCHE…
GO:0050877	neurological system process	GO_BiologicalProcess-GOA_09.02.2016_16h18	2.3e-30	2.1e-27	7.5e-24	3.6e-22	[3]	Group19	20.9136	293	[AAAS, AARS, ABCA7, ABI2, ABL2, ACD, ADCY3, ADORA1, ADRA1A, ADRB2, ALDH7A1, ANK3, ANO1, AP1S2, APLP2, ARF4, ARL6, ASIC1, ATAD1, ATF6, ATP1A2, ATP1A3, ATP2B4, ATP8A1, ATXN1, ATXN2, ATXN7, AXIN1, BBS10, BBS4, BBS7, BCHE, BCR, BDNF, BDNF-AS, BRAF, BTBD9, BTG2, CACNA1C, CACNA1E, CACNB4, CACNG3, CACNG7, CALB1, CAMK2B, CAMK4, CAMTA1, CASP3, CCDC6, CDH23, CDKN1B, CDKN2D, CEBPB, CHM, CHMP2B, CHRNA1, CHRN…
GO:0007600	sensory perception	GO_BiologicalProcess-GOA_09.02.2016_16h18	3.9e-49	3.6e-46	7.5e-24	3.6e-22	[4]	Group19	14.5083	149	[ADCY3, ADORA1, ADRB2, ALDH7A1, ANO1, ARL6, ASIC1, ATF6, ATP2B4, ATXN7, AXIN1, BBS10, BBS4, BBS7, BTBD9, CACNA1E, CACNB4, CASP3, CCDC6, CDH23, CDKN1B, CDKN2D, CHM, CLN5, CLN6, CNGB1, CNNM4, CNR1, COL18A1, COL1A1, COL2A1, CPAMD8, CRYZ, CYP4V2, DFNA5, DFNB31, DHRS3, DIAPH1, DLG2, DLL4, DNAJC19, E2F1, EDN1, EFEMP1, EML2, EPHB1, F2R, FAM107B, FAM134B, FAM161A, FAM65B, FBXO11, FGFR1, FZD2, FZD4, GABRR…
GO:0002252	immune effector process	GO_BiologicalProcess-GOA_09.02.2016_16h18	2.6e-08	2.1e-05	1.1e-11	4.1e-10	[2]	Group2	25.7506	223	[ABCF3, ACTB, ACTG1, ACTR3, AIM2, ALKBH5, ANKRD17, ANXA1, AP1S1, AP1S2, AP2A2, APLF, APOBEC3C, ARF1, ATP6V1H, BAIAP2, BCL10, BCL3, BCL6, BCR, BIRC2, BNIP3, BRK1, C1RL, C5, CAMK4, CD24, CD47, CD59, CEBPB, CEBPG, CHAF1B, CHGA, CLSTN1, COX8A, CPLX2, CRCP, CRK, CSPG5, CSRP1, CTSC, CTSH, CYFIP1, DDIT4, DDX58, DNAJC3, DOCK1, DUSP10, DUSP22, EHHADH, ELMO1, ELMOD2, EMP2, EOMES, EPHB6, ERCC1, EXO1, EXOSC3…
GO:0009607	response to biotic stimulus	GO_BiologicalProcess-GOA_09.02.2016_16h18	1.1e-09	9.9e-07	1.1e-11	4.1e-10	[2]	Group2	25.7782	265	[ABCA1, ABCE1, ABCF3, ACTA2, ADH5, AIM2, AKIRIN2, ALKBH5, ALPL, ANG, ANKRD1, ANKRD17, AP1S1, AP1S2, AP2A2, APAF1, APOBEC3C, ARF1, ASS1, ATP6V1H, AXL, BAD, BAIAP2, BAIAP2L1, BANF1, BATF3, BCL10, BCL3, BCR, BIRC2, BNIP3, BTBD17, BYSL, CASP3, CCDC130, CCT5, CD24, CD47, CEBPB, CHAF1B, CHGA, CHUK, CLN5, CLSTN1, CNR1, CNTN1, COTL1, COX8A, CPAMD8, CPS1, CRCP, CREBZF, CSPG5, CSRP1, CTR9, CXCL12, CXCL3, C…
GO:0051707	response to other organism	GO_BiologicalProcess-GOA_09.02.2016_16h18	9.7e-11	8.2e-08	1.1e-11	4.1e-10	[2, 4]	Group2	25.0505	248	[ABCA1, ABCE1, ABCF3, ACTA2, ADH5, AIM2, AKIRIN2, ALKBH5, ALPL, ANG, ANKRD1, ANKRD17, AP1S1, AP1S2, AP2A2, APOBEC3C, ARF1, ASS1, ATP6V1H, AXL, BAD, BAIAP2, BAIAP2L1, BANF1, BATF3, BCL10, BCL3, BCR, BIRC2, BNIP3, BTBD17, BYSL, CASP3, CCDC130, CCT5, CD24, CD47, CEBPB, CHAF1B, CHGA, CHUK, CLN5, CLSTN1, CNR1, CNTN1, COTL1, COX8A, CPAMD8, CPS1, CRCP, CREBZF, CSPG5, CSRP1, CTR9, CXCL12, CXCL3, CYBA, DD…
GO:0002697	regulation of immune effector process	GO_BiologicalProcess-GOA_09.02.2016_16h18	1.9e-05	0.014	1.1e-11	4.1e-10	[3, 4]	Group2	25	111	[AIM2, ALKBH5, ANKRD17, ANXA1, AP1S1, AP1S2, AP2A2, APLF, ARF1, ATP6V1H, BCL10, BCL6, BCR, BIRC2, C5, CD24, CD59, CHAF1B, COX8A, CSPG5, DDX58, DUSP10, DUSP22, EHHADH, ELMO1, ELMOD2, EXOSC3, FADD, FANCL, FER, FOXJ1, FXR2, FZD5, GAB2, GMIP, GPRC5B, HERC5, HILPDA, HLA-A, HLA-E, HMGB1, HPX, HTRA1, IGF2, IL20RB, IST1, ITCH, ITPKC, KIAA1549L, LAG3, LENG9, LGALS9, LSM4, MALT1, MAVS, MSH6, MSTN, MTSS1, M…
GO:0009617	response to bacterium	GO_BiologicalProcess-GOA_09.02.2016_16h18	5.5e-10	4.6e-07	1.1e-11	4.1e-10	[3, 5]	Group2	22.8333	137	[ABCA1, ADH5, AKIRIN2, ALPL, ANG, ANKRD1, ANKRD17, ASS1, AXL, BAIAP2, BAIAP2L1, BCL10, BCL3, BCR, BYSL, CASP3, CD24, CD47, CEBPB, CHGA, CHUK, CLN5, CNR1, CNTN1, CPAMD8, CPS1, CSRP1, CTR9, CXCL3, CYBA, DNMT1, DROSHA, DUSP10, EDN1, EHHADH, F2R, FAS, FASN, FER, FN1, FOS, FUCA2, FZD5, GSTP1, HDAC5, HIST2H2BE, HLA-A, HLA-E, HMGB2, HNRNPA0, HNRNPM, HSF1, IFNAR1, IKBKB, IRAK1, ISG15, JAK2, JUN, JUNB, LG…
GO:0098542	defense response to other organism	GO_BiologicalProcess-GOA_09.02.2016_16h18	3e-14	2.6e-11	1.1e-11	4.1e-10	[3, 4, 5]	Group2	20.4013	122	[ABCF3, AIM2, ALKBH5, ANG, ANKRD17, AP1S1, AP1S2, AP2A2, APOBEC3C, ARF1, ATP6V1H, BCL3, BIRC2, BNIP3, CEBPB, CHAF1B, CHGA, CLSTN1, COTL1, COX8A, CPAMD8, CRCP, CSPG5, CSRP1, CYBA, DDIT4, DDX58, DNAJC3, DROSHA, EHHADH, ELMO1, ELMOD2, FADD, FAM111A, FANCL, FXR2, GMIP, GPAM, HERC5, HILPDA, HIST2H2BE, HLA-A, HLA-E, HMGB2, HTRA1, HYAL2, IFIT2, IFIT3, IFIT5, IFITM2, IFNAR1, IL10RB, IL17RC, ILF3, IRF1, I…
GO:0051052	regulation of DNA metabolic process	GO_BiologicalProcess-GOA_09.02.2016_16h18	2.5e-05	0.018	2.5e-05	0.00022	[4, 5, 6, 7]	Group20	45.0276	163	[ACD, AIFM1, ANKRD1, ANKRD17, ANTXR1, APAF1, APBB1, APEX1, APLF, AURKB, BABAM1, BCL6, BLM, BMP4, BRCA1, BRCA2, BRCC3, CCT5, CDC6, CDC7, CDK1, CDK2, CDKN1A, CDT1, CEBPG, CHEK1, CHEK2, CIZ1, COL26A1, CST3, DBF4B, DDX39B, DEK, DEPDC1B, DHX36, DKC1, DNA2, DNAJC2, DNMT1, DNMT3A, DSCC1, DUSP1, E2F7, E2F8, ERCC1, ERCC4, ESCO1, ESCO2, EXOSC3, FAM175A, FBXW7, FIGN, FIGNL1, FIGNL2, FOXM1, GJA1, GLI2, GMNN,…
GO:0051128	regulation of cellular component organization	GO_BiologicalProcess-GOA_09.02.2016_16h18	6.8e-17	6e-14	6.8e-17	2.8e-15	[3, 4]	Group21	42.0426	988	[AAK1, ABCA7, ABI2, ABL2, ACAA2, ACD, ACSL3, ACSL4, ACTL6A, ACTR3, ACVR1B, ADAM15, ADCY6, ADGRB1, ADGRB2, ADGRB3, ADGRL2, ADIPOR1, ADNP2, ADRB2, AGRN, AHI1, AHR, AIFM1, AIM2, AKAP6, AKR1B1, AKT2, ALMS1, AMBRA1, AMIGO2, ANAPC1, ANAPC11, ANAPC7, ANKRD1, ANLN, ANTXR1, ANXA1, ANXA2, AP1AR, APAF1, APBB1, APC, APC2, APEX1, APPL1, ARAP3, ARF1, ARF6, ARFGAP1, ARFGAP3, ARFIP1, ARFIP2, ARHGEF1, ARHGEF10, A…
GO:0051130	positive regulation of cellular component organization	GO_BiologicalProcess-GOA_09.02.2016_16h18	3.2e-08	2.6e-05	6.8e-17	2.8e-15	[3, 4, 5]	Group21	41.6941	507	[ABCA7, ABI2, ABL2, ACD, ACSL3, ACTL6A, ACTR3, ADGRB1, ADGRB2, ADGRB3, ADGRL2, ADRB2, AGRN, AHI1, AHR, AIM2, AKR1B1, AKT2, AMBRA1, AMIGO2, ANAPC11, ANKRD1, ANTXR1, ANXA1, ANXA2, AP1AR, APBB1, APC, APEX1, ARF1, ARF6, ARFIP1, ARFIP2, ARHGEF10, ARHGEF16, ARIH2, ARPC5L, ARPIN, ARSB, ASXL2, ATAD1, ATP8A1, AURKA, AURKB, AXL, BAD, BAG4, BAIAP2, BAIAP2L1, BAMBI, BAP1, BBC3, BBS4, BCAS3, BCL11A, BCL6, BCL…
GO:0033043	regulation of organelle organization	GO_BiologicalProcess-GOA_09.02.2016_16h18	2.1e-13	1.8e-10	6.8e-17	2.8e-15	[4, 5]	Group21	44.3873	518	[ABI2, ABL2, ACAA2, ACD, ACTL6A, ACTR3, ADRB2, AKT2, ALMS1, AMBRA1, ANAPC1, ANAPC11, ANAPC7, ANLN, ANTXR1, ANXA1, ANXA2, AP1AR, APC, APC2, APEX1, ARF1, ARF6, ARFIP1, ARFIP2, ARHGEF10, ARHGEF19, ARHGEF2, ARIH2, ARPC5L, ARPIN, ASXL2, ATAD2, ATAD2B, ATF5, ATG3, ATXN2, ATXN2L, AURKA, AURKB, BAD, BAG4, BAIAP2, BAIAP2L1, BAP1, BBC3, BBS4, BCAS3, BCL6, BIRC5, BMP4, BMP7, BNIP3, BRAF, BRCA1, BRD7, BRK1, …
GO:0010638	positive regulation of organelle organization	GO_BiologicalProcess-GOA_09.02.2016_16h18	1e-05	0.0073	6.8e-17	2.8e-15	[4, 5, 6]	Group21	42.7877	264	[ABI2, ACD, ACTL6A, ACTR3, ADRB2, AKT2, AMBRA1, ANAPC11, ANTXR1, ANXA1, ANXA2, AP1AR, APC, APEX1, ARF1, ARF6, ARFIP1, ARFIP2, ARHGEF10, ARIH2, ARPC5L, ARPIN, ASXL2, AURKA, AURKB, BAD, BAG4, BAIAP2, BAIAP2L1, BAP1, BBC3, BBS4, BCAS3, BCL6, BIRC5, BNIP3, BRAF, BRCA1, BRD7, BRK1, BUD31, C21orf33, C2CD5, CAMK2B, CCNB1, CCT5, CDC42EP1, CDC42EP2, CDC42EP3, CDC42EP4, CDCA5, CDKL2, CDKN1B, CHTOP, CLASP1,…
GO:0008152	metabolic process	GO_BiologicalProcess-GOA_09.02.2016_16h18	1e-42	1e-39	1.8e-10	5.8e-09	[1]	Group22	37.4485	4544
GO:0065007	biological regulation	GO_BiologicalProcess-GOA_09.02.2016_16h18	5.6e-05	0.039	1.8e-10	5.8e-09	[1]	Group22	35.3376	4108
GO:0050789	regulation of biological process	GO_BiologicalProcess-GOA_09.02.2016_16h18	2e-05	0.014	1.8e-10	5.8e-09	[1, 2]	Group22	35.4639	3945
GO:0006807	nitrogen compound metabolic process	GO_BiologicalProcess-GOA_09.02.2016_16h18	2e-37	1.9e-34	1.8e-10	5.8e-09	[2]	Group22	39.8837	2811
GO:0009058	biosynthetic process	GO_BiologicalProcess-GOA_09.02.2016_16h18	1e-32	9.2e-30	1.8e-10	5.8e-09	[2]	Group22	39.8561	2603
GO:0044237	cellular metabolic process	GO_BiologicalProcess-GOA_09.02.2016_16h18	1.5e-49	1.4e-46	1.8e-10	5.8e-09	[2]	Group22	38.5451	4043
GO:0044238	primary metabolic process	GO_BiologicalProcess-GOA_09.02.2016_16h18	3e-37	2.8e-34	1.8e-10	5.8e-09	[2]	Group22	37.9379	4007
GO:0071704	organic substance metabolic process	GO_BiologicalProcess-GOA_09.02.2016_16h18	3e-38	2.8e-35	1.8e-10	5.8e-09	[2]	Group22	37.8316	4121
GO:0019222	regulation of metabolic process	GO_BiologicalProcess-GOA_09.02.2016_16h18	1.9e-27	1.8e-24	1.8e-10	5.8e-09	[2, 3]	Group22	39.1141	2711
GO:0050794	regulation of cellular process	GO_BiologicalProcess-GOA_09.02.2016_16h18	6.4e-06	0.0047	1.8e-10	5.8e-09	[2, 3]	Group22	35.6179	3773
GO:0006725	cellular aromatic compound metabolic process	GO_BiologicalProcess-GOA_09.02.2016_16h18	1.5e-33	1.3e-30	1.8e-10	5.8e-09	[3]	Group22	40.2879	2435
GO:0009893	positive regulation of metabolic process	GO_BiologicalProcess-GOA_09.02.2016_16h18	2.2e-11	1.9e-08	1.8e-10	5.8e-09	[2, 3, 4]	Group22	38.9301	1470
GO:0034641	cellular nitrogen compound metabolic process	GO_BiologicalProcess-GOA_09.02.2016_16h18	1.8e-36	1.7e-33	1.8e-10	5.8e-09	[3]	Group22	40.0267	2697
GO:0043170	macromolecule metabolic process	GO_BiologicalProcess-GOA_09.02.2016_16h18	2.9e-41	2.7e-38	1.8e-10	5.8e-09	[3]	Group22	38.7355	3633	[AAAS, AAK1, AARS, AARSD1, ABCA1, ABCA3, ABCA7, ABCC5, ABCE1, ABCF1, ABCG1, ABHD14A-ACY1, ABHD14B, ABHD5, ABI2, ABL2, ABLIM2, ACACA, ACACB, ACD, ACHE, ACP1, ACTA1, ACTA2, ACTB, ACTC1, ACTL6A, ACTL6B, ACTR8, ACVR1, ACVR1B, ACVR2B, ADAM11, ADAM12, ADAM15, ADAM19, ADAM22, ADAM28, ADAMTS10, ADAMTS12, ADAMTS13, ADAMTS15, ADAMTS18, ADAMTS3, ADAMTS6, ADAMTS7, ADAMTS8, ADAMTS9, ADAMTSL1, ADAT1, ADAT2, AD…
GO:0044249	cellular biosynthetic process	GO_BiologicalProcess-GOA_09.02.2016_16h18	3.6e-33	3.3e-30	1.8e-10	5.8e-09	[3]	Group22	40.0284	2539
GO:0046483	heterocycle metabolic process	GO_BiologicalProcess-GOA_09.02.2016_16h18	3.9e-35	3.6e-32	1.8e-10	5.8e-09	[3]	Group22	40.4446	2438
GO:1901360	organic cyclic compound metabolic process	GO_BiologicalProcess-GOA_09.02.2016_16h18	2.7e-30	2.5e-27	1.8e-10	5.8e-09	[3]	Group22	39.8088	2498
GO:1901576	organic substance biosynthetic process	GO_BiologicalProcess-GOA_09.02.2016_16h18	9.2e-34	8.4e-31	1.8e-10	5.8e-09	[3]	Group22	40.0093	2577
GO:0006139	nucleobase-containing compound metabolic process	GO_BiologicalProcess-GOA_09.02.2016_16h18	5.5e-35	5.1e-32	1.8e-10	5.8e-09	[3, 4]	Group22	40.5859	2369
GO:0009889	regulation of biosynthetic process	GO_BiologicalProcess-GOA_09.02.2016_16h18	8.2e-21	7.3e-18	1.8e-10	5.8e-09	[3, 4]	Group22	40.1688	1761
GO:0019538	protein metabolic process	GO_BiologicalProcess-GOA_09.02.2016_16h18	9.7e-13	8.4e-10	1.8e-10	5.8e-09	[3, 4]	Group22	37.9193	2238	[AAAS, AAK1, AARS, AARSD1, ABCA1, ABCA3, ABCA7, ABCF1, ABCG1, ABHD14A-ACY1, ABHD5, ABI2, ABL2, ACACA, ACD, ACHE, ACP1, ACTB, ACTL6A, ACVR1, ACVR1B, ACVR2B, ADAM11, ADAM12, ADAM15, ADAM19, ADAM22, ADAM28, ADAMTS10, ADAMTS12, ADAMTS13, ADAMTS15, ADAMTS18, ADAMTS3, ADAMTS6, ADAMTS7, ADAMTS8, ADAMTS9, ADAMTSL1, ADCK2, ADCY3, ADCY6, ADCY7, ADCY9, ADH5, ADM2, ADORA1, ADRA1A, ADRB2, ADRBK1, AEBP1, AGBL5…
GO:0031323	regulation of cellular metabolic process	GO_BiologicalProcess-GOA_09.02.2016_16h18	1.7e-22	1.5e-19	1.8e-10	5.8e-09	[3, 4]	Group22	39.1247	2378
GO:0044260	cellular macromolecule metabolic process	GO_BiologicalProcess-GOA_09.02.2016_16h18	2.2e-53	2.1e-50	1.8e-10	5.8e-09	[3, 4]	Group22	39.8176	3449	[AAAS, AAK1, AARS, AARSD1, ABCA1, ABCA3, ABCA7, ABCE1, ABCF1, ABCG1, ABHD14B, ABI2, ABL2, ABLIM2, ACD, ACHE, ACP1, ACTB, ACTL6A, ACTL6B, ACTR8, ACVR1, ACVR1B, ACVR2B, ADAMTS12, ADAMTS13, ADAMTS7, ADAMTS9, ADAMTSL1, ADAT1, ADAT2, ADCK2, ADCY3, ADCY6, ADCY7, ADCY9, ADH5, ADM2, ADNP2, ADORA1, ADRA1A, ADRB2, ADRBK1, AEBP1, AEBP2, AFF1, AFF3, AFF4, AGBL5, AGO2, AGO3, AGO4, AGRN, AHCTF1, AHI1, AHR, AIF…
GO:0051171	regulation of nitrogen compound metabolic process	GO_BiologicalProcess-GOA_09.02.2016_16h18	4.3e-23	3.9e-20	1.8e-10	5.8e-09	[3, 4]	Group22	40.4558	1793
GO:0060255	regulation of macromolecule metabolic process	GO_BiologicalProcess-GOA_09.02.2016_16h18	1.8e-24	1.6e-21	1.8e-10	5.8e-09	[3, 4]	Group22	39.3965	2363
GO:0080090	regulation of primary metabolic process	GO_BiologicalProcess-GOA_09.02.2016_16h18	4.8e-21	4.3e-18	1.8e-10	5.8e-09	[3, 4]	Group22	39.0057	2338
GO:0009059	macromolecule biosynthetic process	GO_BiologicalProcess-GOA_09.02.2016_16h18	5.1e-40	4.7e-37	1.8e-10	5.8e-09	[4]	Group22	41.4734	2235
GO:0009891	positive regulation of biosynthetic process	GO_BiologicalProcess-GOA_09.02.2016_16h18	3.1e-05	0.022	1.8e-10	5.8e-09	[3, 4, 5]	Group22	38.6001	750
GO:0010467	gene expression	GO_BiologicalProcess-GOA_09.02.2016_16h18	5.3e-28	4.8e-25	1.8e-10	5.8e-09	[4]	Group22	40.1602	2206
GO:0010604	positive regulation of macromolecule metabolic process	GO_BiologicalProcess-GOA_09.02.2016_16h18	2.4e-10	2e-07	1.8e-10	5.8e-09	[3, 4, 5]	Group22	39.3292	1196	[ABCA7, ABCF1, ABHD14B, ABL2, ABLIM2, ACD, ACTA1, ACTA2, ACTB, ACTC1, ACVR1, ACVR1B, ACVR2B, ADCY3, ADCY6, ADCY7, ADCY9, ADM2, ADORA1, ADRA1A, ADRB2, AFF1, AGO2, AGRN, AHI1, AHR, AIFM1, AIM2, AKAP6, AKAP9, AKIRIN2, AKNA, AKR1B1, AKT2, ALS2, ANAPC1, ANAPC11, ANAPC7, ANG, ANK3, ANKRD1, ANTXR1, ANXA2, APAF1, APBB1, APC, APC2, APEX1, APITD1, APLF, ARF4, ARHGEF11, ARHGEF2, ARID3B, ARID4A, ARID4B, ARID…
GO:0018130	heterocycle biosynthetic process	GO_BiologicalProcess-GOA_09.02.2016_16h18	1.1e-20	9.9e-18	1.8e-10	5.8e-09	[4]	Group22	40.0535	1796
GO:0019438	aromatic compound biosynthetic process	GO_BiologicalProcess-GOA_09.02.2016_16h18	4.6e-20	4e-17	1.8e-10	5.8e-09	[4]	Group22	39.9555	1794
GO:0031325	positive regulation of cellular metabolic process	GO_BiologicalProcess-GOA_09.02.2016_16h18	2.9e-08	2.3e-05	1.8e-10	5.8e-09	[3, 4, 5]	Group22	38.6667	1189	[ABCA1, ABCA7, ABCF1, ABHD14B, ABHD5, ABL2, ABLIM2, ACACA, ACACB, ACD, ACSL3, ACVR1, ACVR1B, ACVR2B, ADCY3, ADCY6, ADCY7, ADCY9, ADORA1, ADRA1A, ADRB2, AFF1, AGO2, AGPAT1, AGRN, AHI1, AHR, AIFM1, AIM2, AKAP6, AKAP9, AKIRIN2, AKNA, AKR1B1, AKT2, ALS2, AMBRA1, ANAPC1, ANAPC11, ANAPC7, ANG, ANKRD1, ANTXR1, ANXA1, ANXA2, APAF1, APBB1, APEX1, APITD1, APLF, APLN, ARF4, ARHGEF11, ARHGEF2, ARID3B, ARID4A…
GO:0044271	cellular nitrogen compound biosynthetic process	GO_BiologicalProcess-GOA_09.02.2016_16h18	2.2e-23	2e-20	1.8e-10	5.8e-09	[4]	Group22	39.9761	2010
GO:0051173	positive regulation of nitrogen compound metabolic process	GO_BiologicalProcess-GOA_09.02.2016_16h18	5.4e-07	0.00042	1.8e-10	5.8e-09	[3, 4, 5]	Group22	39.5203	758
GO:1901362	organic cyclic compound biosynthetic process	GO_BiologicalProcess-GOA_09.02.2016_16h18	8.3e-19	7.3e-16	1.8e-10	5.8e-09	[4]	Group22	39.6623	1832
GO:0010468	regulation of gene expression	GO_BiologicalProcess-GOA_09.02.2016_16h18	1.4e-22	1.3e-19	1.8e-10	5.8e-09	[4, 5]	Group22	40.4231	1777
GO:0010556	regulation of macromolecule biosynthetic process	GO_BiologicalProcess-GOA_09.02.2016_16h18	1.3e-24	1.2e-21	1.8e-10	5.8e-09	[4, 5]	Group22	40.9705	1697
GO:0019219	regulation of nucleobase-containing compound metabolic process	GO_BiologicalProcess-GOA_09.02.2016_16h18	1.2e-22	1.1e-19	1.8e-10	5.8e-09	[4, 5]	Group22	40.6878	1680
GO:0031326	regulation of cellular biosynthetic process	GO_BiologicalProcess-GOA_09.02.2016_16h18	4.3e-21	3.8e-18	1.8e-10	5.8e-09	[4, 5]	Group22	40.2535	1747
GO:0034645	cellular macromolecule biosynthetic process	GO_BiologicalProcess-GOA_09.02.2016_16h18	3.5e-41	3.2e-38	1.8e-10	5.8e-09	[4, 5]	Group22	41.7416	2181
GO:0034654	nucleobase-containing compound biosynthetic process	GO_BiologicalProcess-GOA_09.02.2016_16h18	9.1e-20	8e-17	1.8e-10	5.8e-09	[4, 5]	Group22	39.9864	1763
GO:0044267	cellular protein metabolic process	GO_BiologicalProcess-GOA_09.02.2016_16h18	1e-20	9.1e-18	1.8e-10	5.8e-09	[4, 5]	Group22	39.4586	2070	[AAAS, AAK1, AARS, AARSD1, ABCA1, ABCA3, ABCA7, ABCF1, ABI2, ABL2, ACD, ACP1, ACTB, ACTL6A, ACVR1, ACVR1B, ACVR2B, ADAMTS12, ADAMTS13, ADAMTS7, ADAMTSL1, ADCK2, ADCY3, ADCY6, ADCY7, ADCY9, ADH5, ADM2, ADORA1, ADRA1A, ADRB2, ADRBK1, AGBL5, AGO2, AGO3, AGO4, AIFM1, AIM2, AKAP1, AKAP6, AKAP9, AKIRIN2, AKR1B1, AKT1S1, AKT2, ALG10B, ALG13, ALG14, ALG2, ALG3, ALG5, ALG6, ALG8, ALPK3, ALS2, ANAPC1, ANAP…
GO:0090304	nucleic acid metabolic process	GO_BiologicalProcess-GOA_09.02.2016_16h18	6.4e-40	5.9e-37	1.8e-10	5.8e-09	[4, 5]	Group22	41.6395	2169
GO:0010557	positive regulation of macromolecule biosynthetic process	GO_BiologicalProcess-GOA_09.02.2016_16h18	2.5e-07	0.00019	1.8e-10	5.8e-09	[4, 5, 6]	Group22	39.9098	708
GO:0010628	positive regulation of gene expression	GO_BiologicalProcess-GOA_09.02.2016_16h18	1.5e-08	1.3e-05	1.8e-10	5.8e-09	[4, 5, 6]	Group22	40.28	748
GO:0016070	RNA metabolic process	GO_BiologicalProcess-GOA_09.02.2016_16h18	1e-29	9.5e-27	1.8e-10	5.8e-09	[4, 5, 6]	Group22	41.0798	1925
GO:0031328	positive regulation of cellular biosynthetic process	GO_BiologicalProcess-GOA_09.02.2016_16h18	1.5e-05	0.011	1.8e-10	5.8e-09	[4, 5, 6]	Group22	38.8075	742
GO:0045935	positive regulation of nucleobase-containing compound metabolic process	GO_BiologicalProcess-GOA_09.02.2016_16h18	8.7e-07	0.00067	1.8e-10	5.8e-09	[4, 5, 6]	Group22	39.5822	720
GO:0051252	regulation of RNA metabolic process	GO_BiologicalProcess-GOA_09.02.2016_16h18	7.5e-23	6.8e-20	1.8e-10	5.8e-09	[4, 5, 6, 7]	Group22	41.0988	1556
GO:0051254	positive regulation of RNA metabolic process	GO_BiologicalProcess-GOA_09.02.2016_16h18	2.4e-08	1.9e-05	1.8e-10	5.8e-09	[4, 5, 6, 7, 8]	Group22	40.7407	649
GO:0051276	chromosome organization	GO_BiologicalProcess-GOA_09.02.2016_16h18	6.4e-21	5.7e-18	6.4e-21	2.9e-19	[4]	Group23	47.3043	544
GO:0006325	chromatin organization	GO_BiologicalProcess-GOA_09.02.2016_16h18	1.2e-11	1.1e-08	6.4e-21	2.9e-19	[4, 5]	Group23	45.953	352
GO:0016570	histone modification	GO_BiologicalProcess-GOA_09.02.2016_16h18	1.7e-08	1.3e-05	6.4e-21	2.9e-19	[3, 4, 5, 6, 7, 8]	Group23	47.2603	207
GO:0051606	detection of stimulus	GO_BiologicalProcess-GOA_09.02.2016_16h18	4.1e-40	3.8e-37	4.1e-40	2e-38	[2]	Group24	13.9623	111
GO:0051640	organelle localization	GO_BiologicalProcess-GOA_09.02.2016_16h18	1.5e-08	1.2e-05	1.7e-10	5.6e-09	[3]	Group25	46.5587	230
GO:0051668	localization within membrane	GO_BiologicalProcess-GOA_09.02.2016_16h18	3.2e-06	0.0024	1.7e-10	5.6e-09	[3]	Group25	57.5758	57
GO:0051656	establishment of organelle localization	GO_BiologicalProcess-GOA_09.02.2016_16h18	3.3e-09	2.7e-06	1.7e-10	5.6e-09	[3, 4]	Group25	49.1892	182
GO:0016050	vesicle organization	GO_BiologicalProcess-GOA_09.02.2016_16h18	8.1e-06	0.0059	1.7e-10	5.6e-09	[4]	Group25	47.0588	136
GO:0051648	vesicle localization	GO_BiologicalProcess-GOA_09.02.2016_16h18	1.2e-07	9.6e-05	1.7e-10	5.6e-09	[4]	Group25	50.6024	126
GO:0006900	membrane budding	GO_BiologicalProcess-GOA_09.02.2016_16h18	6.4e-06	0.0047	1.7e-10	5.6e-09	[4, 5]	Group25	53.8462	70
GO:0051650	establishment of vesicle localization	GO_BiologicalProcess-GOA_09.02.2016_16h18	5.5e-07	0.00043	1.7e-10	5.6e-09	[4, 5]	Group25	50.211	119
GO:0006903	vesicle targeting	GO_BiologicalProcess-GOA_09.02.2016_16h18	1.1e-06	0.00091	1.7e-10	5.6e-09	[3, 5, 6]	Group25	59.3407	54
GO:1902591	single-organism membrane budding	GO_BiologicalProcess-GOA_09.02.2016_16h18	7.5e-07	0.00058	1.7e-10	5.6e-09	[4, 5, 6]	Group25	60.2273	53
GO:0051704	multi-organism process	GO_BiologicalProcess-GOA_09.02.2016_16h18	2.3e-07	0.00018	2.3e-07	5.9e-06	[1]	Group26	29.9105	769
GO:0055085	transmembrane transport	GO_BiologicalProcess-GOA_09.02.2016_16h18	6e-05	0.042	1.5e-05	0.00018	[3, 4, 5]	Group27	29.589	432
GO:0006811	ion transport	GO_BiologicalProcess-GOA_09.02.2016_16h18	7e-06	0.0052	1.5e-05	0.00018	[4, 5]	Group27	29.279	467
GO:0048468	cell development	GO_BiologicalProcess-GOA_09.02.2016_16h18	4.6e-05	0.032	3.2e-05	0.00023	[3, 4, 5]	Group28	38.0629	896	[ABI2, ABL2, ABLIM2, ACHE, ACSL4, ACTA1, ACTA2, ACTB, ACTC1, ACTG1, ACTR3, ACVR1, ADAM15, ADAM22, ADCY6, ADGRB1, ADGRB3, AFF4, AGFG1, AGRN, AHI1, AKAP6, AKAP9, AKR1B1, AKT2, ALPK3, ALS2, ANG, ANK3, ANKRD1, ANOS1, ANTXR1, ANXA2, AP1AR, AP2A2, APBB1, APC, APEX1, APH1A, ARF1, ARF4, ARF6, ARHGAP39, ARHGEF1, ARHGEF10, ARHGEF11, ARHGEF2, ARID4A, ARID4B, ARID5B, ARIH2, ARL13B, ARL3, ARNTL, ARSB, ASAP1, …
GO:0051960	regulation of nervous system development	GO_BiologicalProcess-GOA_09.02.2016_16h18	8.9e-06	0.0065	3.2e-05	0.00023	[4, 5, 6]	Group28	41.6769	338
GO:0060284	regulation of cell development	GO_BiologicalProcess-GOA_09.02.2016_16h18	3.4e-05	0.024	3.2e-05	0.00023	[4, 5, 6]	Group28	40.7735	369	[ABL2, ADCY6, ADGRB3, AKAP6, ANKRD1, AP1AR, APBB1, APEX1, ARF1, ARF6, ARHGEF1, ARHGEF2, ARNTL, ARSB, ASAP1, ASCL1, ASPM, ATF5, ATP6AP1, ATXN1, AURKA, B4GALT1, BAD, BAIAP2, BAMBI, BCL11A, BCL11B, BCL6, BCL9L, BDNF, BDNF-AS, BHLHE23, BIN1, BMP2, BMP4, BMP7, BNIP2, BRAF, BRINP2, BUD31, C1D, C21orf33, CAMK1D, CAMK2B, CASZ1, CD24, CDC20, CDH2, CDH4, CDK1, CDK5R1, CDK5RAP1, CDK5RAP2, CDK5RAP3, CDKL5, C…
GO:0060322	head development	GO_BiologicalProcess-GOA_09.02.2016_16h18	4.1e-07	0.00032	4e-13	1.6e-11	[3]	Group29	42.6829	350
GO:0007399	nervous system development	GO_BiologicalProcess-GOA_09.02.2016_16h18	1.2e-12	1e-09	4e-13	1.6e-11	[4, 5]	Group29	40.5469	1038	[AARS, ABCB6, ABI2, ABL2, ABLIM2, ACAT1, ACD, ACHE, ACSL3, ACSL4, ACTB, ACTG1, ACTL6A, ACTL6B, ACTR3, ACVR1B, ADAM22, ADCY6, ADGRB1, ADGRB2, ADGRB3, ADGRL2, ADNP2, ADORA1, AGRN, AHI1, AIFM1, AK2, AK7, AKAP9, AKT2, ALDH3A2, ALDH5A1, ALS2, AMBRA1, AMIGO2, ANK3, ANKRD1, ANOS1, ANXA1, AP2A2, APAF1, APBA1, APBA2, APBB1, APC, APCDD1, APEX1, APH1A, APLP1, APLP2, ARCN1, ARF1, ARF4, ARF6, ARHGAP11B, ARHGA…
GO:0007417	central nervous system development	GO_BiologicalProcess-GOA_09.02.2016_16h18	1.3e-07	0.0001	4e-13	1.6e-11	[4, 5, 6]	Group29	42.0744	430	[AARS, ABCB6, ABL2, ACAT1, ACD, ACSL3, ACTB, ACTL6A, ACTL6B, ACVR1B, ADAM22, AHI1, AK2, AK7, ALDH3A2, ALDH5A1, APAF1, APEX1, APLP2, ARCN1, ARF4, ARHGAP11B, ARL13B, ARL6, ARMC4, ARNT2, ARSA, ARSB, ASCL1, ASPM, ATF5, ATP2B1, ATP2B4, ATXN2, AXIN1, AXL, B3GNT5, BAD, BAG3, BBS4, BBS7, BCL11B, BCR, BDH1, BIN1, BMP2, BMP4, BOK, BRCA1, BRCA2, BTD, BTG2, BUD31, BYSL, C1D, C21orf33, C2CD3, C5orf42, CASP2, …
GO:0007420	brain development	GO_BiologicalProcess-GOA_09.02.2016_16h18	1e-06	0.0008	4e-13	1.6e-11	[3, 4, 5, 6, 7]	Group29	42.5997	331
GO:0030900	forebrain development	GO_BiologicalProcess-GOA_09.02.2016_16h18	5.9e-05	0.041	4e-13	1.6e-11	[3, 4, 5, 6, 7, 8]	Group29	43.7055	184
GO:0021537	telencephalon development	GO_BiologicalProcess-GOA_09.02.2016_16h18	7e-06	0.0052	4e-13	1.6e-11	[3, 4, 5, 6, 7, 8, 9]	Group29	47.5836	128
GO:0009894	regulation of catabolic process	GO_BiologicalProcess-GOA_09.02.2016_16h18	3.1e-07	0.00024	2.5e-07	6.1e-06	[3, 4]	Group3	43.3752	311
GO:0009057	macromolecule catabolic process	GO_BiologicalProcess-GOA_09.02.2016_16h18	1.7e-05	0.012	2.5e-07	6.1e-06	[4]	Group3	40.0328	488
GO:0009896	positive regulation of catabolic process	GO_BiologicalProcess-GOA_09.02.2016_16h18	2.9e-05	0.021	2.5e-07	6.1e-06	[3, 4, 5]	Group3	44.3609	177
GO:0030163	protein catabolic process	GO_BiologicalProcess-GOA_09.02.2016_16h18	1.3e-06	0.001	2.5e-07	6.1e-06	[4, 5]	Group3	42.2062	352
GO:0031329	regulation of cellular catabolic process	GO_BiologicalProcess-GOA_09.02.2016_16h18	9e-06	0.0066	2.5e-07	6.1e-06	[4, 5]	Group3	42.9766	257
GO:0044265	cellular macromolecule catabolic process	GO_BiologicalProcess-GOA_09.02.2016_16h18	6.1e-05	0.042	2.5e-07	6.1e-06	[4, 5]	Group3	40.3708	392
GO:0050900	leukocyte migration	GO_BiologicalProcess-GOA_09.02.2016_16h18	3.4e-06	0.0026	3.3e-06	5.9e-05	[2, 4, 5, 6]	Group30	23.4375	90
GO:0060326	cell chemotaxis	GO_BiologicalProcess-GOA_09.02.2016_16h18	4.2e-05	0.029	3.3e-06	5.9e-05	[4, 5, 6]	Group30	22.6054	59
GO:0005975	carbohydrate metabolic process	GO_BiologicalProcess-GOA_09.02.2016_16h18	6.9e-09	5.7e-06	8e-06	0.00011	[3]	Group31	42.5909	457
GO:1901135	carbohydrate derivative metabolic process	GO_BiologicalProcess-GOA_09.02.2016_16h18	3.1e-05	0.022	8e-06	0.00011	[3]	Group31	39.3668	572
GO:0044723	single-organism carbohydrate metabolic process	GO_BiologicalProcess-GOA_09.02.2016_16h18	3e-08	2.4e-05	8e-06	0.00011	[3, 4]	Group31	43.1151	382
GO:0009100	glycoprotein metabolic process	GO_BiologicalProcess-GOA_09.02.2016_16h18	5.3e-08	4.2e-05	8e-06	0.00011	[4, 5]	Group31	45.2007	259
GO:0070085	glycosylation	GO_BiologicalProcess-GOA_09.02.2016_16h18	1.8e-08	1.4e-05	8e-06	0.00011	[4, 5]	Group31	47.0982	211
GO:0006486	protein glycosylation	GO_BiologicalProcess-GOA_09.02.2016_16h18	3.6e-08	2.9e-05	8e-06	0.00011	[3, 6, 7]	Group31	46.9526	208
GO:0006487	protein N-linked glycosylation	GO_BiologicalProcess-GOA_09.02.2016_16h18	2e-10	1.7e-07	8e-06	0.00011	[4, 7, 8]	Group31	53.1599	143
GO:0070925	organelle assembly	GO_BiologicalProcess-GOA_09.02.2016_16h18	4.3e-06	0.0032	4.3e-06	7.3e-05	[4]	Group32	42.9688	275
GO:0009719	response to endogenous stimulus	GO_BiologicalProcess-GOA_09.02.2016_16h18	4.6e-10	3.8e-07	6.2e-07	1.4e-05	[2]	Group33	40.9487	751
GO:0010033	response to organic substance	GO_BiologicalProcess-GOA_09.02.2016_16h18	4.3e-07	0.00033	6.2e-07	1.4e-05	[3]	Group33	38.2297	1205
GO:0071495	cellular response to endogenous stimulus	GO_BiologicalProcess-GOA_09.02.2016_16h18	4e-11	3.4e-08	6.2e-07	1.4e-05	[3]	Group33	42.5858	583
GO:1901698	response to nitrogen compound	GO_BiologicalProcess-GOA_09.02.2016_16h18	5.8e-06	0.0043	6.2e-07	1.4e-05	[3]	Group33	40.581	461
GO:0009725	response to hormone	GO_BiologicalProcess-GOA_09.02.2016_16h18	4.3e-06	0.0032	6.2e-07	1.4e-05	[3, 4]	Group33	40.6497	463
GO:0010243	response to organonitrogen compound	GO_BiologicalProcess-GOA_09.02.2016_16h18	1.2e-06	0.00094	6.2e-07	1.4e-05	[3, 4]	Group33	41.3397	432
GO:0070848	response to growth factor	GO_BiologicalProcess-GOA_09.02.2016_16h18	2.3e-08	1.9e-05	6.2e-07	1.4e-05	[4]	Group33	42.5743	430
GO:0071310	cellular response to organic substance	GO_BiologicalProcess-GOA_09.02.2016_16h18	8.8e-07	0.00068	6.2e-07	1.4e-05	[4]	Group33	38.7241	953
GO:1901699	cellular response to nitrogen compound	GO_BiologicalProcess-GOA_09.02.2016_16h18	1.4e-06	0.001	6.2e-07	1.4e-05	[4]	Group33	42.6121	323
GO:0032870	cellular response to hormone stimulus	GO_BiologicalProcess-GOA_09.02.2016_16h18	4e-05	0.028	6.2e-07	1.4e-05	[4, 5]	Group33	41.2596	321
GO:0071417	cellular response to organonitrogen compound	GO_BiologicalProcess-GOA_09.02.2016_16h18	5.4e-07	0.00042	6.2e-07	1.4e-05	[4, 5]	Group33	43.2857	303
GO:0071560	cellular response to transforming growth factor beta stimulus	GO_BiologicalProcess-GOA_09.02.2016_16h18	6.6e-05	0.045	6.6e-05	0.00013	[4, 6]	Group34	46.2406	123
GO:0044085	cellular component biogenesis	GO_BiologicalProcess-GOA_09.02.2016_16h18	2.2e-16	1.9e-13	5.7e-23	2.6e-21	[2]	Group35	41.1596	1150
GO:0022607	cellular component assembly	GO_BiologicalProcess-GOA_09.02.2016_16h18	9.3e-16	8.1e-13	5.7e-23	2.6e-21	[3]	Group35	41.3194	1071
GO:0043933	macromolecular complex subunit organization	GO_BiologicalProcess-GOA_09.02.2016_16h18	8.3e-17	7.2e-14	5.7e-23	2.6e-21	[3]	Group35	41.3844	1124
GO:0065003	macromolecular complex assembly	GO_BiologicalProcess-GOA_09.02.2016_16h18	1.1e-10	9.9e-08	5.7e-23	2.6e-21	[4]	Group35	41.4806	706
GO:0071822	protein complex subunit organization	GO_BiologicalProcess-GOA_09.02.2016_16h18	3.4e-08	2.7e-05	5.7e-23	2.6e-21	[4]	Group35	40	776
GO:0006461	protein complex assembly	GO_BiologicalProcess-GOA_09.02.2016_16h18	2e-09	1.6e-06	5.7e-23	2.6e-21	[4, 5]	Group35	41.6435	598
GO:0080135	regulation of cellular response to stress	GO_BiologicalProcess-GOA_09.02.2016_16h18	1.5e-10	1.3e-07	1.5e-10	5.2e-09	[3, 4, 5]	Group36	45.8874	318
GO:0007059	chromosome segregation	GO_BiologicalProcess-GOA_09.02.2016_16h18	2.7e-12	2.3e-09	1.8e-20	7.9e-19	[3]	Group37	54.0268	161	[ACTR3, ANAPC1, ANAPC11, ANAPC7, APC, APITD1, ARL8A, ARL8B, AURKB, AURKC, BHLHE40, BIRC5, BRCA1, BRCA2, BRD4, BUB1, BUB1B, BUB3, CASC5, CCNB1, CDC16, CDC20, CDC6, CDCA2, CDCA5, CDCA8, CDK5RAP2, CENPE, CENPF, CENPN, CENPW, CEP55, CEP57, CEP85, CHMP2B, CHMP6, CIT, CSNK2A2, CTCF, CUL3, DDX11, DDX3Y, DHDDS, DLGAP5, DMC1, DSCC1, DSN1, DUSP1, DYNC1LI1, ECT2, ERCC2, ERCC4, ESCO1, ESCO2, ESPL1, FAM175B, …
GO:0051983	regulation of chromosome segregation	GO_BiologicalProcess-GOA_09.02.2016_16h18	4.3e-05	0.03	1.8e-20	7.9e-19	[3, 4]	Group37	54.5455	54
GO:0048285	organelle fission	GO_BiologicalProcess-GOA_09.02.2016_16h18	3.4e-17	3e-14	1.8e-20	7.9e-19	[4]	Group37	50.4777	317	[ACOX1, ACTR3, ACTR8, ADCY3, AKAP8, ANAPC1, ANAPC11, ANAPC13, ANAPC7, ANLN, APC, APITD1, ARHGEF10, ARHGEF2, ARL8A, ARPP19, ASPM, ASUN, ATG3, AURKA, AURKB, AURKC, BABAM1, BHLHE40, BIRC2, BIRC5, BIRC6, BMP4, BMP7, BNIP3, BRCA2, BRCC3, BUB1, BUB1B, BUB3, CAMK2B, CASC5, CCAR2, CCNA2, CCNB1, CCNB2, CCNF, CCNG2, CD2AP, CDC14A, CDC16, CDC20, CDC25A, CDC25B, CDC25C, CDC6, CDCA2, CDCA3, CDCA5, CDCA8, CDK1…
GO:0098813	nuclear chromosome segregation	GO_BiologicalProcess-GOA_09.02.2016_16h18	9.5e-07	0.00073	1.8e-20	7.9e-19	[4, 5]	Group37	50.2203	114
GO:0000819	sister chromatid segregation	GO_BiologicalProcess-GOA_09.02.2016_16h18	4.4e-06	0.0032	1.8e-20	7.9e-19	[4, 5, 6]	Group37	51.8293	85
GO:0007067	mitotic nuclear division	GO_BiologicalProcess-GOA_09.02.2016_16h18	3.4e-21	3e-18	1.8e-20	7.9e-19	[4, 5, 6]	Group37	55.7018	254	[ACTR8, AKAP8, ANAPC1, ANAPC11, ANAPC13, ANAPC7, ANLN, APC, APITD1, ARHGEF10, ARHGEF2, ARL8A, ARPP19, ASPM, ASUN, AURKA, AURKB, AURKC, BABAM1, BHLHE40, BIRC2, BIRC5, BIRC6, BMP4, BMP7, BRCC3, BUB1, BUB1B, BUB3, CASC5, CCNA2, CCNB1, CCNB2, CCNF, CCNG2, CD2AP, CDC14A, CDC16, CDC20, CDC25A, CDC25B, CDC25C, CDC6, CDCA2, CDCA3, CDCA5, CDCA8, CDK1, CDK11A, CDK11B, CDK13, CDK2, CENPE, CENPF, CENPN, CENP…
GO:0033036	macromolecule localization	GO_BiologicalProcess-GOA_09.02.2016_16h18	3.2e-11	2.7e-08	4.2e-12	1.6e-10	[2]	Group38	39.6863	1164
GO:0051641	cellular localization	GO_BiologicalProcess-GOA_09.02.2016_16h18	4.5e-12	3.9e-09	4.2e-12	1.6e-10	[2]	Group38	39.6297	1263
GO:0008104	protein localization	GO_BiologicalProcess-GOA_09.02.2016_16h18	1.4e-13	1.2e-10	4.2e-12	1.6e-10	[3]	Group38	40.8044	1045
GO:0051649	establishment of localization in cell	GO_BiologicalProcess-GOA_09.02.2016_16h18	9.1e-08	7.2e-05	4.2e-12	1.6e-10	[3]	Group38	38.7925	1073
GO:0070727	cellular macromolecule localization	GO_BiologicalProcess-GOA_09.02.2016_16h18	1.1e-10	1e-07	4.2e-12	1.6e-10	[3]	Group38	41.6615	677
GO:1902580	single-organism cellular localization	GO_BiologicalProcess-GOA_09.02.2016_16h18	4.7e-07	0.00037	4.2e-12	1.6e-10	[3]	Group38	40.6994	547
GO:0045184	establishment of protein localization	GO_BiologicalProcess-GOA_09.02.2016_16h18	2.5e-08	2e-05	4.2e-12	1.6e-10	[3, 4]	Group38	39.7911	838
GO:0034613	cellular protein localization	GO_BiologicalProcess-GOA_09.02.2016_16h18	6.1e-11	5.2e-08	4.2e-12	1.6e-10	[4]	Group38	41.7957	675
GO:0046907	intracellular transport	GO_BiologicalProcess-GOA_09.02.2016_16h18	8.5e-09	7e-06	4.2e-12	1.6e-10	[4]	Group38	40.1606	800
GO:0015031	protein transport	GO_BiologicalProcess-GOA_09.02.2016_16h18	3.5e-06	0.0026	4.2e-12	1.6e-10	[4, 5]	Group38	39.0681	763
GO:1902582	single-organism intracellular transport	GO_BiologicalProcess-GOA_09.02.2016_16h18	4.6e-08	3.7e-05	4.2e-12	1.6e-10	[4, 5]	Group38	40.1428	731
GO:0032101	regulation of response to external stimulus	GO_BiologicalProcess-GOA_09.02.2016_16h18	3.5e-05	0.025	6.2e-08	1.6e-06	[3, 4]	Group39	28.178	266
GO:0006954	inflammatory response	GO_BiologicalProcess-GOA_09.02.2016_16h18	2.8e-10	2.4e-07	6.2e-08	1.6e-06	[4]	Group39	23.6364	169
GO:1903034	regulation of response to wounding	GO_BiologicalProcess-GOA_09.02.2016_16h18	2.1e-05	0.015	6.2e-08	1.6e-06	[4, 5]	Group39	25.0559	112
GO:0050727	regulation of inflammatory response	GO_BiologicalProcess-GOA_09.02.2016_16h18	2e-06	0.0015	6.2e-08	1.6e-06	[4, 5, 6]	Group39	22.1519	70
GO:0031023	microtubule organizing center organization	GO_BiologicalProcess-GOA_09.02.2016_16h18	4.3e-08	3.4e-05	4.3e-08	1.2e-06	[4, 5, 6]	Group4	58.6777	71
GO:1904029	regulation of cyclin-dependent protein kinase activity	GO_BiologicalProcess-GOA_09.02.2016_16h18	4.5e-06	0.0034	4.5e-06	6.8e-05	[4, 5, 7, 8, 9, 10]	Group40	52.2013	83
GO:0033554	cellular response to stress	GO_BiologicalProcess-GOA_09.02.2016_16h18	8.1e-25	7.3e-22	3.3e-27	1.6e-25	[3]	Group41	44.6735	910
GO:0006974	cellular response to DNA damage stimulus	GO_BiologicalProcess-GOA_09.02.2016_16h18	8.9e-20	7.8e-17	3.3e-27	1.6e-25	[4]	Group41	49.3381	410
GO:0006259	DNA metabolic process	GO_BiologicalProcess-GOA_09.02.2016_16h18	1e-17	9.1e-15	3.3e-27	1.6e-25	[4, 5, 6]	Group41	47.0705	474
GO:0006281	DNA repair	GO_BiologicalProcess-GOA_09.02.2016_16h18	4.1e-17	3.6e-14	3.3e-27	1.6e-25	[3, 5, 6, 7]	Group41	51.8868	275
GO:0000725	recombinational repair	GO_BiologicalProcess-GOA_09.02.2016_16h18	1.5e-06	0.0011	3.3e-27	1.6e-25	[4, 6, 7, 8]	Group41	53.2051	83
GO:0006302	double-strand break repair	GO_BiologicalProcess-GOA_09.02.2016_16h18	3.1e-09	2.5e-06	3.3e-27	1.6e-25	[4, 6, 7, 8]	Group41	53.2468	123
GO:2001020	regulation of response to DNA damage stimulus	GO_BiologicalProcess-GOA_09.02.2016_16h18	2.8e-06	0.0021	2.8e-06	5.3e-05	[4, 5, 6]	Group42	52.1472	85
GO:0006793	phosphorus metabolic process	GO_BiologicalProcess-GOA_09.02.2016_16h18	1.2e-07	0.0001	1.2e-07	3.3e-06	[3]	Group43	38.3024	1259
GO:0006796	phosphate-containing compound metabolic process	GO_BiologicalProcess-GOA_09.02.2016_16h18	1e-07	8.3e-05	1.2e-07	3.3e-06	[4]	Group43	38.371	1239
GO:0007017	microtubule-based process	GO_BiologicalProcess-GOA_09.02.2016_16h18	6.4e-16	5.5e-13	1.3e-12	5.4e-11	[3]	Group44	49.6845	315
GO:0007010	cytoskeleton organization	GO_BiologicalProcess-GOA_09.02.2016_16h18	7.7e-12	6.6e-09	1.3e-12	5.4e-11	[4]	Group44	43.7772	503
GO:0000226	microtubule cytoskeleton organization	GO_BiologicalProcess-GOA_09.02.2016_16h18	9e-17	7.9e-14	1.3e-12	5.4e-11	[4, 5]	Group44	53.1868	242
GO:0007051	spindle organization	GO_BiologicalProcess-GOA_09.02.2016_16h18	2e-06	0.0015	2e-06	4.2e-05	[4, 5, 6]	Group45	53.8462	77
GO:0007186	G-protein coupled receptor signaling pathway	GO_BiologicalProcess-GOA_09.02.2016_16h18	5.4e-60	5e-57	5.4e-60	2.9e-58	[4, 5]	Group46	15.1538	202
GO:0009628	response to abiotic stimulus	GO_BiologicalProcess-GOA_09.02.2016_16h18	1.5e-05	0.011	1.5e-05	0.00017	[2]	Group47	39.8618	519
GO:0009314	response to radiation	GO_BiologicalProcess-GOA_09.02.2016_16h18	5e-05	0.035	1.5e-05	0.00017	[3]	Group47	42.5225	236
GO:0009987	cellular process	GO_BiologicalProcess-GOA_09.02.2016_16h18	5.9e-19	5.2e-16	5.9e-19	2.5e-17	[1]	Group48	35.3418	5449
GO:0010256	endomembrane system organization	GO_BiologicalProcess-GOA_09.02.2016_16h18	4.6e-05	0.032	4.6e-05	0.00018	[3]	Group49	42.5267	239
GO:0048519	negative regulation of biological process	GO_BiologicalProcess-GOA_09.02.2016_16h18	6.1e-11	5.2e-08	6.1e-11	2.1e-09	[1, 2, 3]	Group5	38.1648	1830
GO:0009892	negative regulation of metabolic process	GO_BiologicalProcess-GOA_09.02.2016_16h18	5.5e-09	4.5e-06	6.1e-11	2.1e-09	[2, 3, 4]	Group5	39.1474	1102
GO:0048523	negative regulation of cellular process	GO_BiologicalProcess-GOA_09.02.2016_16h18	1.4e-12	1.2e-09	6.1e-11	2.1e-09	[2, 3, 4]	Group5	38.7265	1709
GO:0009890	negative regulation of biosynthetic process	GO_BiologicalProcess-GOA_09.02.2016_16h18	2.3e-09	1.9e-06	6.1e-11	2.1e-09	[3, 4, 5]	Group5	41.195	655
GO:0010605	negative regulation of macromolecule metabolic process	GO_BiologicalProcess-GOA_09.02.2016_16h18	1.5e-10	1.3e-07	6.1e-11	2.1e-09	[3, 4, 5]	Group5	40	1006
GO:0031324	negative regulation of cellular metabolic process	GO_BiologicalProcess-GOA_09.02.2016_16h18	3.2e-09	2.7e-06	6.1e-11	2.1e-09	[3, 4, 5]	Group5	39.5833	988
GO:0051172	negative regulation of nitrogen compound metabolic process	GO_BiologicalProcess-GOA_09.02.2016_16h18	9.5e-11	8e-08	6.1e-11	2.1e-09	[3, 4, 5]	Group5	41.7976	665
GO:0010558	negative regulation of macromolecule biosynthetic process	GO_BiologicalProcess-GOA_09.02.2016_16h18	1.9e-10	1.6e-07	6.1e-11	2.1e-09	[4, 5, 6]	Group5	41.9226	628
GO:0010629	negative regulation of gene expression	GO_BiologicalProcess-GOA_09.02.2016_16h18	5e-10	4.2e-07	6.1e-11	2.1e-09	[4, 5, 6]	Group5	41.468	661
GO:0031327	negative regulation of cellular biosynthetic process	GO_BiologicalProcess-GOA_09.02.2016_16h18	7.2e-10	6e-07	6.1e-11	2.1e-09	[4, 5, 6]	Group5	41.4853	648
GO:0045934	negative regulation of nucleobase-containing compound metabolic process	GO_BiologicalProcess-GOA_09.02.2016_16h18	1.7e-09	1.4e-06	6.1e-11	2.1e-09	[4, 5, 6]	Group5	41.5815	610
GO:0051253	negative regulation of RNA metabolic process	GO_BiologicalProcess-GOA_09.02.2016_16h18	1e-08	8.9e-06	6.1e-11	2.1e-09	[4, 5, 6, 7, 8]	Group5	41.6224	549
GO:0048518	positive regulation of biological process	GO_BiologicalProcess-GOA_09.02.2016_16h18	4.2e-09	3.4e-06	3.8e-23	1.7e-21	[1, 2, 3]	Group50	37.3394	2150
GO:0019222	regulation of metabolic process	GO_BiologicalProcess-GOA_09.02.2016_16h18	1.9e-27	1.8e-24	3.8e-23	1.7e-21	[2, 3]	Group50	39.1141	2711
GO:0009893	positive regulation of metabolic process	GO_BiologicalProcess-GOA_09.02.2016_16h18	2.2e-11	1.9e-08	3.8e-23	1.7e-21	[2, 3, 4]	Group50	38.9301	1470
GO:0048522	positive regulation of cellular process	GO_BiologicalProcess-GOA_09.02.2016_16h18	1e-09	8.6e-07	3.8e-23	1.7e-21	[2, 3, 4]	Group50	37.8307	1873
GO:0009889	regulation of biosynthetic process	GO_BiologicalProcess-GOA_09.02.2016_16h18	8.2e-21	7.3e-18	3.8e-23	1.7e-21	[3, 4]	Group50	40.1688	1761
GO:0031323	regulation of cellular metabolic process	GO_BiologicalProcess-GOA_09.02.2016_16h18	1.7e-22	1.5e-19	3.8e-23	1.7e-21	[3, 4]	Group50	39.1247	2378
GO:0051171	regulation of nitrogen compound metabolic process	GO_BiologicalProcess-GOA_09.02.2016_16h18	4.3e-23	3.9e-20	3.8e-23	1.7e-21	[3, 4]	Group50	40.4558	1793
GO:0060255	regulation of macromolecule metabolic process	GO_BiologicalProcess-GOA_09.02.2016_16h18	1.8e-24	1.6e-21	3.8e-23	1.7e-21	[3, 4]	Group50	39.3965	2363
GO:0080090	regulation of primary metabolic process	GO_BiologicalProcess-GOA_09.02.2016_16h18	4.8e-21	4.3e-18	3.8e-23	1.7e-21	[3, 4]	Group50	39.0057	2338
GO:0009891	positive regulation of biosynthetic process	GO_BiologicalProcess-GOA_09.02.2016_16h18	3.1e-05	0.022	3.8e-23	1.7e-21	[3, 4, 5]	Group50	38.6001	750
GO:0010604	positive regulation of macromolecule metabolic process	GO_BiologicalProcess-GOA_09.02.2016_16h18	2.4e-10	2e-07	3.8e-23	1.7e-21	[3, 4, 5]	Group50	39.3292	1196	[ABCA7, ABCF1, ABHD14B, ABL2, ABLIM2, ACD, ACTA1, ACTA2, ACTB, ACTC1, ACVR1, ACVR1B, ACVR2B, ADCY3, ADCY6, ADCY7, ADCY9, ADM2, ADORA1, ADRA1A, ADRB2, AFF1, AGO2, AGRN, AHI1, AHR, AIFM1, AIM2, AKAP6, AKAP9, AKIRIN2, AKNA, AKR1B1, AKT2, ALS2, ANAPC1, ANAPC11, ANAPC7, ANG, ANK3, ANKRD1, ANTXR1, ANXA2, APAF1, APBB1, APC, APC2, APEX1, APITD1, APLF, ARF4, ARHGEF11, ARHGEF2, ARID3B, ARID4A, ARID4B, ARID…
GO:0031325	positive regulation of cellular metabolic process	GO_BiologicalProcess-GOA_09.02.2016_16h18	2.9e-08	2.3e-05	3.8e-23	1.7e-21	[3, 4, 5]	Group50	38.6667	1189	[ABCA1, ABCA7, ABCF1, ABHD14B, ABHD5, ABL2, ABLIM2, ACACA, ACACB, ACD, ACSL3, ACVR1, ACVR1B, ACVR2B, ADCY3, ADCY6, ADCY7, ADCY9, ADORA1, ADRA1A, ADRB2, AFF1, AGO2, AGPAT1, AGRN, AHI1, AHR, AIFM1, AIM2, AKAP6, AKAP9, AKIRIN2, AKNA, AKR1B1, AKT2, ALS2, AMBRA1, ANAPC1, ANAPC11, ANAPC7, ANG, ANKRD1, ANTXR1, ANXA1, ANXA2, APAF1, APBB1, APEX1, APITD1, APLF, APLN, ARF4, ARHGEF11, ARHGEF2, ARID3B, ARID4A…
GO:0051173	positive regulation of nitrogen compound metabolic process	GO_BiologicalProcess-GOA_09.02.2016_16h18	5.4e-07	0.00042	3.8e-23	1.7e-21	[3, 4, 5]	Group50	39.5203	758
GO:0010468	regulation of gene expression	GO_BiologicalProcess-GOA_09.02.2016_16h18	1.4e-22	1.3e-19	3.8e-23	1.7e-21	[4, 5]	Group50	40.4231	1777
GO:0010556	regulation of macromolecule biosynthetic process	GO_BiologicalProcess-GOA_09.02.2016_16h18	1.3e-24	1.2e-21	3.8e-23	1.7e-21	[4, 5]	Group50	40.9705	1697
GO:0019219	regulation of nucleobase-containing compound metabolic process	GO_BiologicalProcess-GOA_09.02.2016_16h18	1.2e-22	1.1e-19	3.8e-23	1.7e-21	[4, 5]	Group50	40.6878	1680
GO:0031326	regulation of cellular biosynthetic process	GO_BiologicalProcess-GOA_09.02.2016_16h18	4.3e-21	3.8e-18	3.8e-23	1.7e-21	[4, 5]	Group50	40.2535	1747
GO:0051246	regulation of protein metabolic process	GO_BiologicalProcess-GOA_09.02.2016_16h18	1.8e-05	0.013	3.8e-23	1.7e-21	[4, 5]	Group50	37.9135	1043	[AARS, AARSD1, ABCA7, ABCF1, ABL2, ACVR1, ACVR1B, ACVR2B, ADCY3, ADCY6, ADCY7, ADCY9, ADORA1, ADRA1A, ADRB2, AGO2, AGO3, AGO4, AIFM1, AIM2, AKAP1, AKAP6, AKAP9, AKIRIN2, AKR1B1, AKT1S1, AKT2, ALS2, ANAPC1, ANAPC11, ANAPC7, ANG, ANOS1, ANXA2, APAF1, APBB1, APC, APC2, APEX1, APITD1, APLP2, ARFGEF3, ARHGEF2, ARIH1, ARIH2, ARL2BP, ARL6IP5, ARNT, ARNTL, ARPP19, ARRDC3, ASH1L, ASXL2, ATF3, ATF4, ATP2B4…
GO:0010557	positive regulation of macromolecule biosynthetic process	GO_BiologicalProcess-GOA_09.02.2016_16h18	2.5e-07	0.00019	3.8e-23	1.7e-21	[4, 5, 6]	Group50	39.9098	708
GO:0010628	positive regulation of gene expression	GO_BiologicalProcess-GOA_09.02.2016_16h18	1.5e-08	1.3e-05	3.8e-23	1.7e-21	[4, 5, 6]	Group50	40.28	748
GO:0031328	positive regulation of cellular biosynthetic process	GO_BiologicalProcess-GOA_09.02.2016_16h18	1.5e-05	0.011	3.8e-23	1.7e-21	[4, 5, 6]	Group50	38.8075	742
GO:0032268	regulation of cellular protein metabolic process	GO_BiologicalProcess-GOA_09.02.2016_16h18	8.5e-06	0.0062	3.8e-23	1.7e-21	[4, 5, 6]	Group50	38.2273	979	[AARS, AARSD1, ABCA7, ABCF1, ABL2, ACVR1, ACVR1B, ACVR2B, ADCY3, ADCY6, ADCY7, ADCY9, ADORA1, ADRA1A, ADRB2, AGO2, AGO3, AGO4, AIFM1, AIM2, AKAP1, AKAP6, AKAP9, AKIRIN2, AKR1B1, AKT1S1, AKT2, ALS2, ANAPC1, ANAPC11, ANAPC7, ANG, ANOS1, ANXA2, APAF1, APC, APEX1, APITD1, APLP2, ARFGEF3, ARHGEF2, ARIH1, ARIH2, ARL2BP, ARL6IP5, ARNT, ARPP19, ARRDC3, ASH1L, ASXL2, ATF3, ATF4, ATP2B4, ATP6AP1, ATRAID, A…
GO:0045935	positive regulation of nucleobase-containing compound metabolic process	GO_BiologicalProcess-GOA_09.02.2016_16h18	8.7e-07	0.00067	3.8e-23	1.7e-21	[4, 5, 6]	Group50	39.5822	720
GO:0051252	regulation of RNA metabolic process	GO_BiologicalProcess-GOA_09.02.2016_16h18	7.5e-23	6.8e-20	3.8e-23	1.7e-21	[4, 5, 6, 7]	Group50	41.0988	1556
GO:0051254	positive regulation of RNA metabolic process	GO_BiologicalProcess-GOA_09.02.2016_16h18	2.4e-08	1.9e-05	3.8e-23	1.7e-21	[4, 5, 6, 7, 8]	Group50	40.7407	649
GO:0000723	telomere maintenance	GO_BiologicalProcess-GOA_09.02.2016_16h18	2.5e-06	0.0019	2.5e-06	5e-05	[3, 4, 5, 6, 7]	Group51	54.6154	71
GO:0010833	telomere maintenance via telomere lengthening	GO_BiologicalProcess-GOA_09.02.2016_16h18	6.3e-05	0.043	2.5e-06	5e-05	[4, 5, 6, 7, 8]	Group51	54.8387	51
GO:0071840	cellular component organization or biogenesis	GO_BiologicalProcess-GOA_09.02.2016_16h18	1.1e-41	1e-38	1.1e-41	5.7e-40	[1]	Group52	40.6245	2641
GO:0016043	cellular component organization	GO_BiologicalProcess-GOA_09.02.2016_16h18	1.5e-40	1.4e-37	1.1e-41	5.7e-40	[2]	Group52	40.6373	2589
GO:0006996	organelle organization	GO_BiologicalProcess-GOA_09.02.2016_16h18	2.6e-44	2.4e-41	1.1e-41	5.7e-40	[3]	Group52	43.8821	1682
GO:1902589	single-organism organelle organization	GO_BiologicalProcess-GOA_09.02.2016_16h18	1.1e-32	1e-29	1.1e-41	5.7e-40	[3, 4]	Group52	44.2693	1236
GO:0016241	regulation of macroautophagy	GO_BiologicalProcess-GOA_09.02.2016_16h18	1.4e-05	0.01	1.4e-05	0.00019	[4, 5, 6, 7]	Group53	55.3398	57
GO:0032103	positive regulation of response to external stimulus	GO_BiologicalProcess-GOA_09.02.2016_16h18	4.3e-06	0.0032	4.3e-06	7e-05	[3, 4, 5]	Group6	22.3642	70
GO:0032886	regulation of microtubule-based process	GO_BiologicalProcess-GOA_09.02.2016_16h18	2.7e-05	0.019	2.7e-05	0.00022	[3, 4]	Group7	50	84
GO:0023051	regulation of signaling	GO_BiologicalProcess-GOA_09.02.2016_16h18	1.4e-05	0.01	5.2e-12	2e-10	[2, 3]	Group8	37.6697	1193
GO:0010646	regulation of cell communication	GO_BiologicalProcess-GOA_09.02.2016_16h18	1.1e-06	0.00085	5.2e-12	2e-10	[3, 4]	Group8	38.0623	1210
GO:0035556	intracellular signal transduction	GO_BiologicalProcess-GOA_09.02.2016_16h18	2.4e-07	0.00019	5.2e-12	2e-10	[4, 5]	Group8	38.5475	1104
GO:0035966	response to topologically incorrect protein	GO_BiologicalProcess-GOA_09.02.2016_16h18	6.7e-07	0.00052	1.1e-08	3.3e-07	[3, 4]	Group9	52.1739	96
GO:0034976	response to endoplasmic reticulum stress	GO_BiologicalProcess-GOA_09.02.2016_16h18	7.2e-08	5.7e-05	1.1e-08	3.3e-07	[4]	Group9	50.3759	134
GO:0006986	response to unfolded protein	GO_BiologicalProcess-GOA_09.02.2016_16h18	2.6e-07	0.0002	1.1e-08	3.3e-07	[4, 5]	Group9	53.4884	92
GO:0035967	cellular response to topologically incorrect protein	GO_BiologicalProcess-GOA_09.02.2016_16h18	3.8e-06	0.0028	1.1e-08	3.3e-07	[4, 5]	Group9	53.1034	77
GO:0030968	endoplasmic reticulum unfolded protein response	GO_BiologicalProcess-GOA_09.02.2016_16h18	1.9e-06	0.0015	1.1e-08	3.3e-07	[4, 5, 6, 7]	Group9	54.5455	72
